# Supplementary material for: Unified synthesis of enantiopure β2h, β3h and β2,3-amino acids
Source: Royal Society of Chemistry journal article supplement (doi:10.1039/c0sc00317d), 2010-01-01

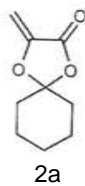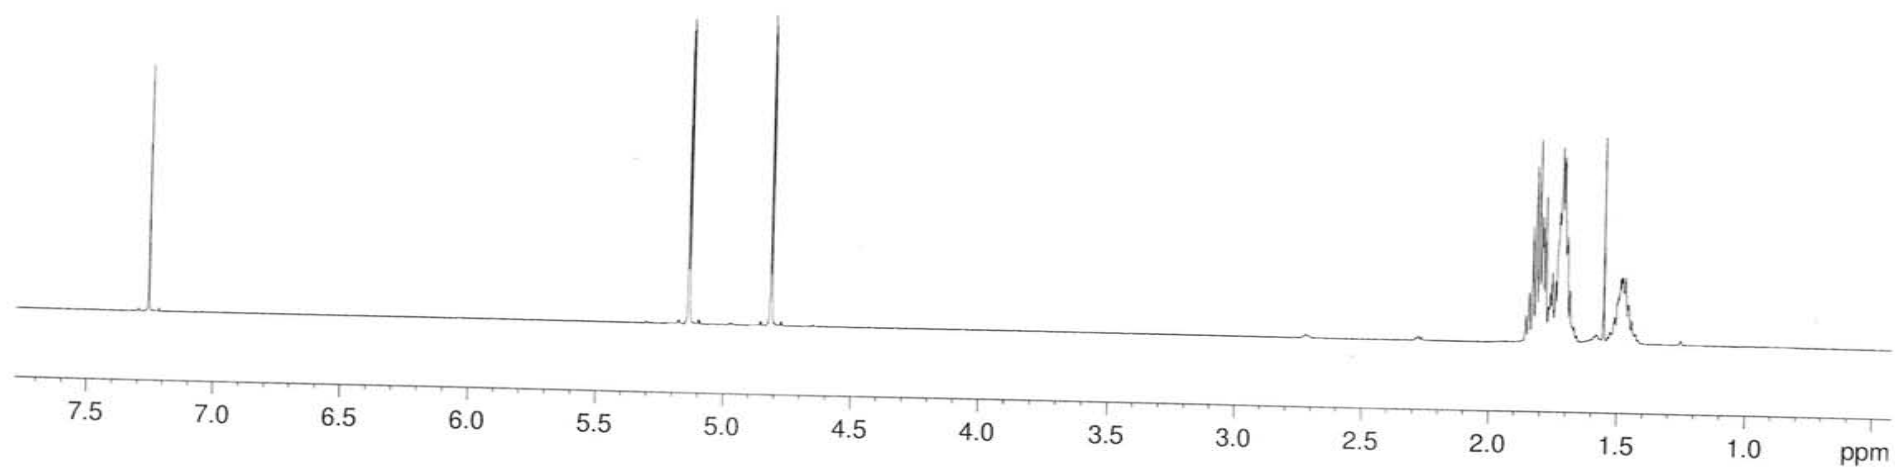

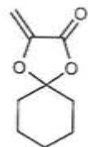

2a

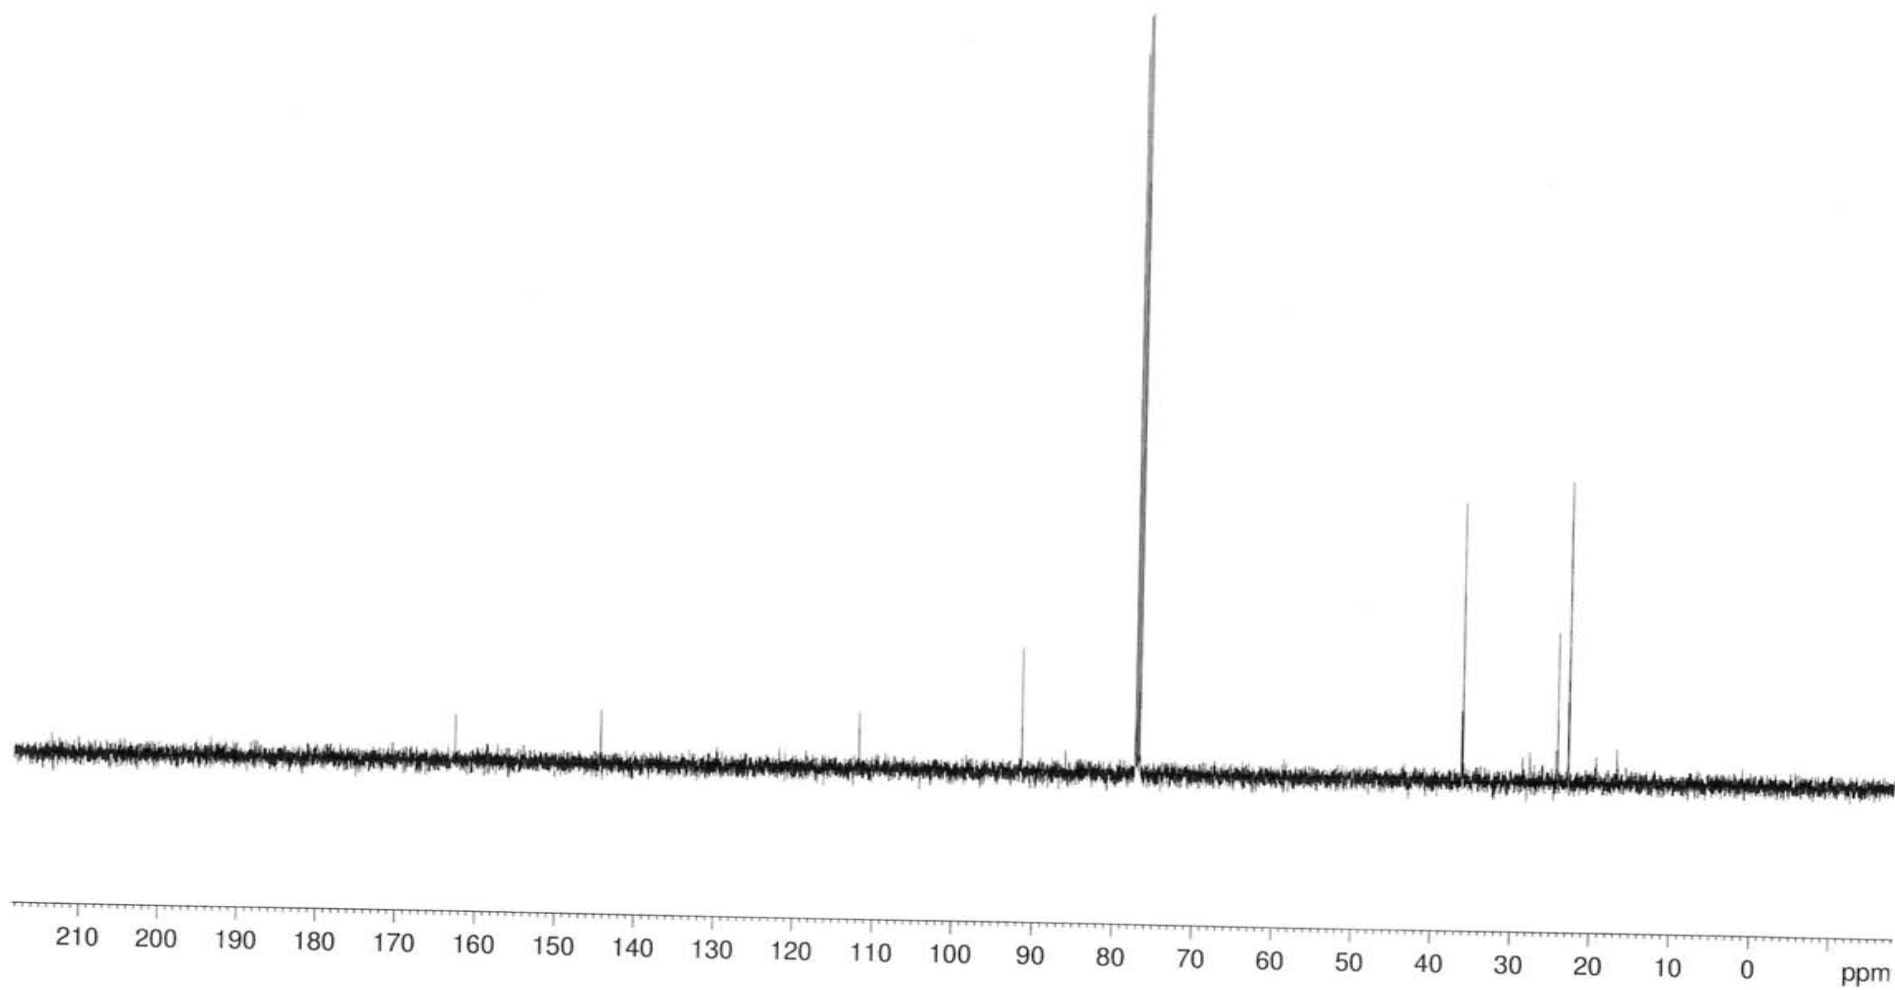

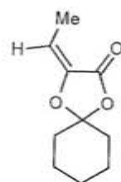

E-2b

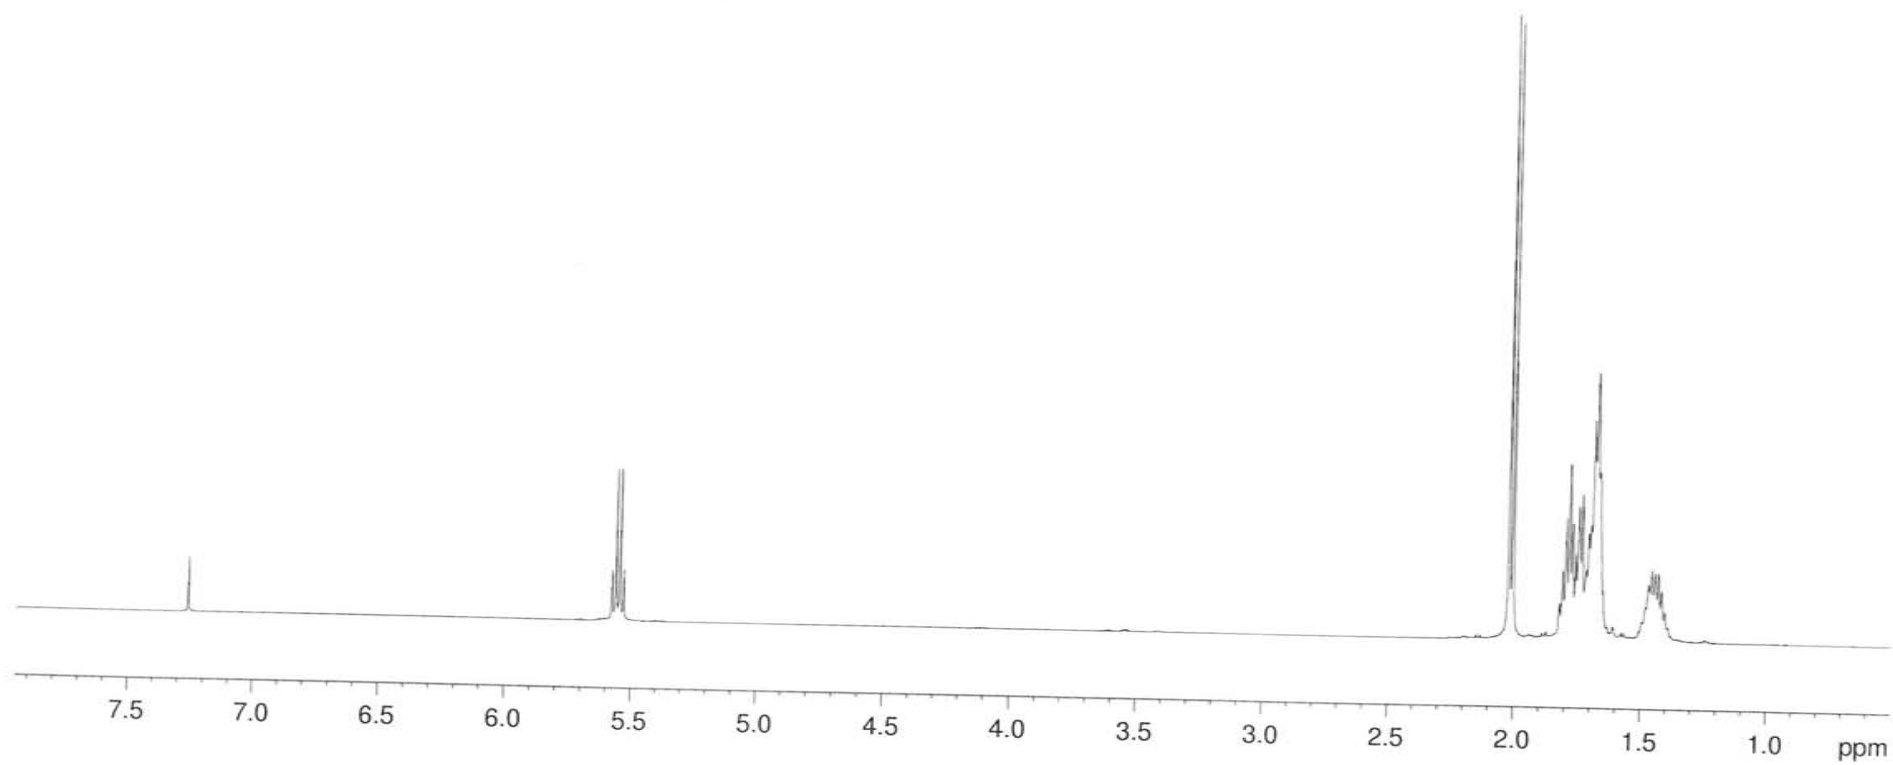

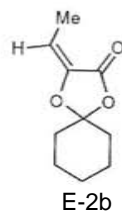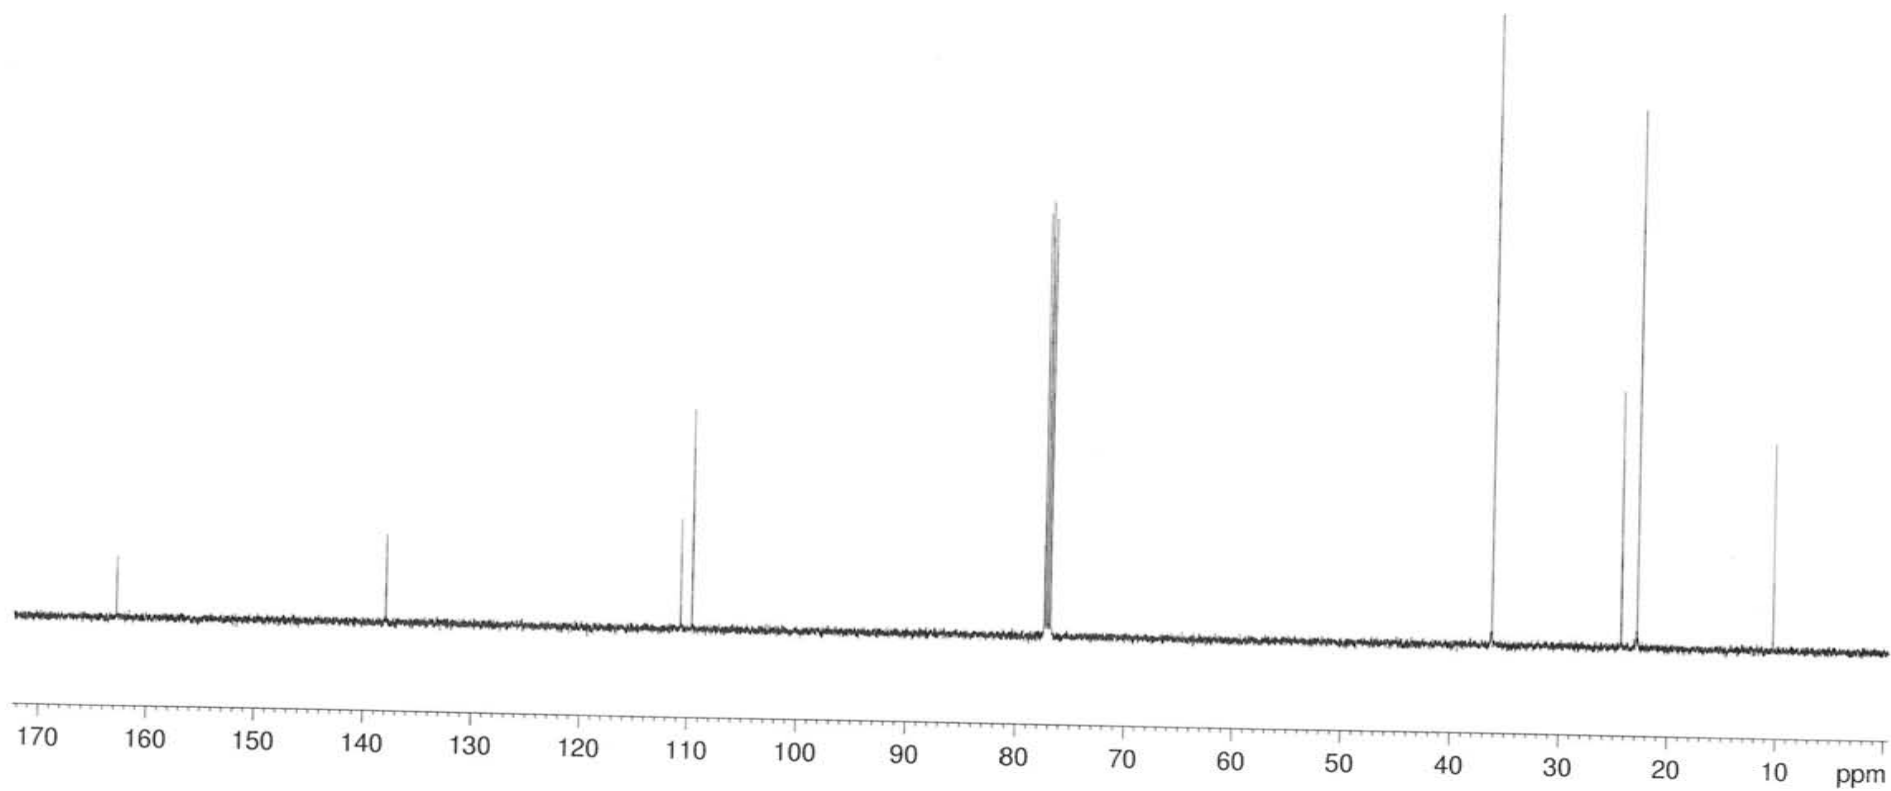



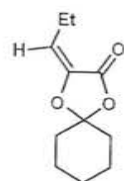

E-2c

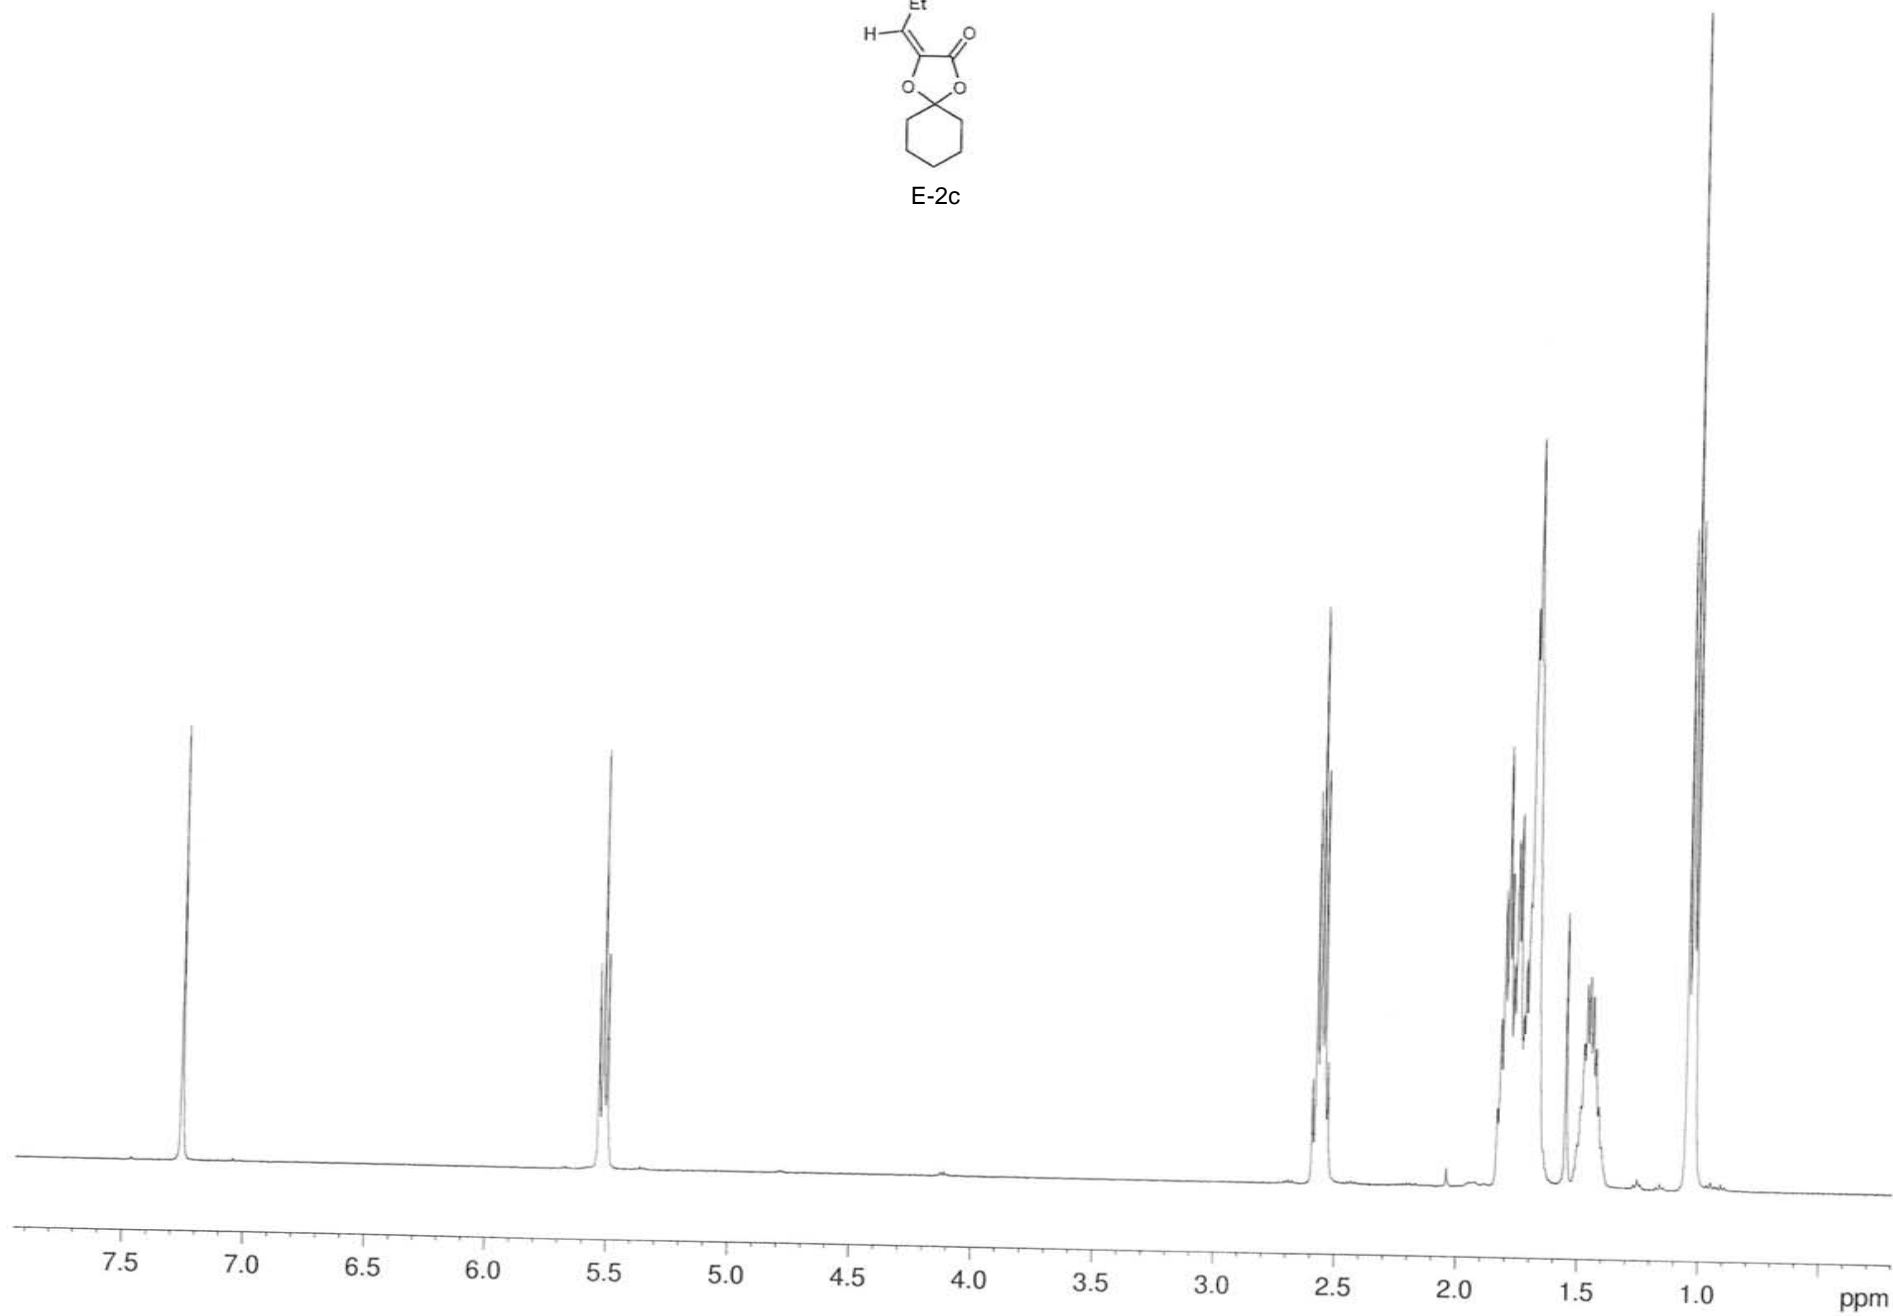

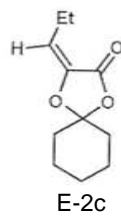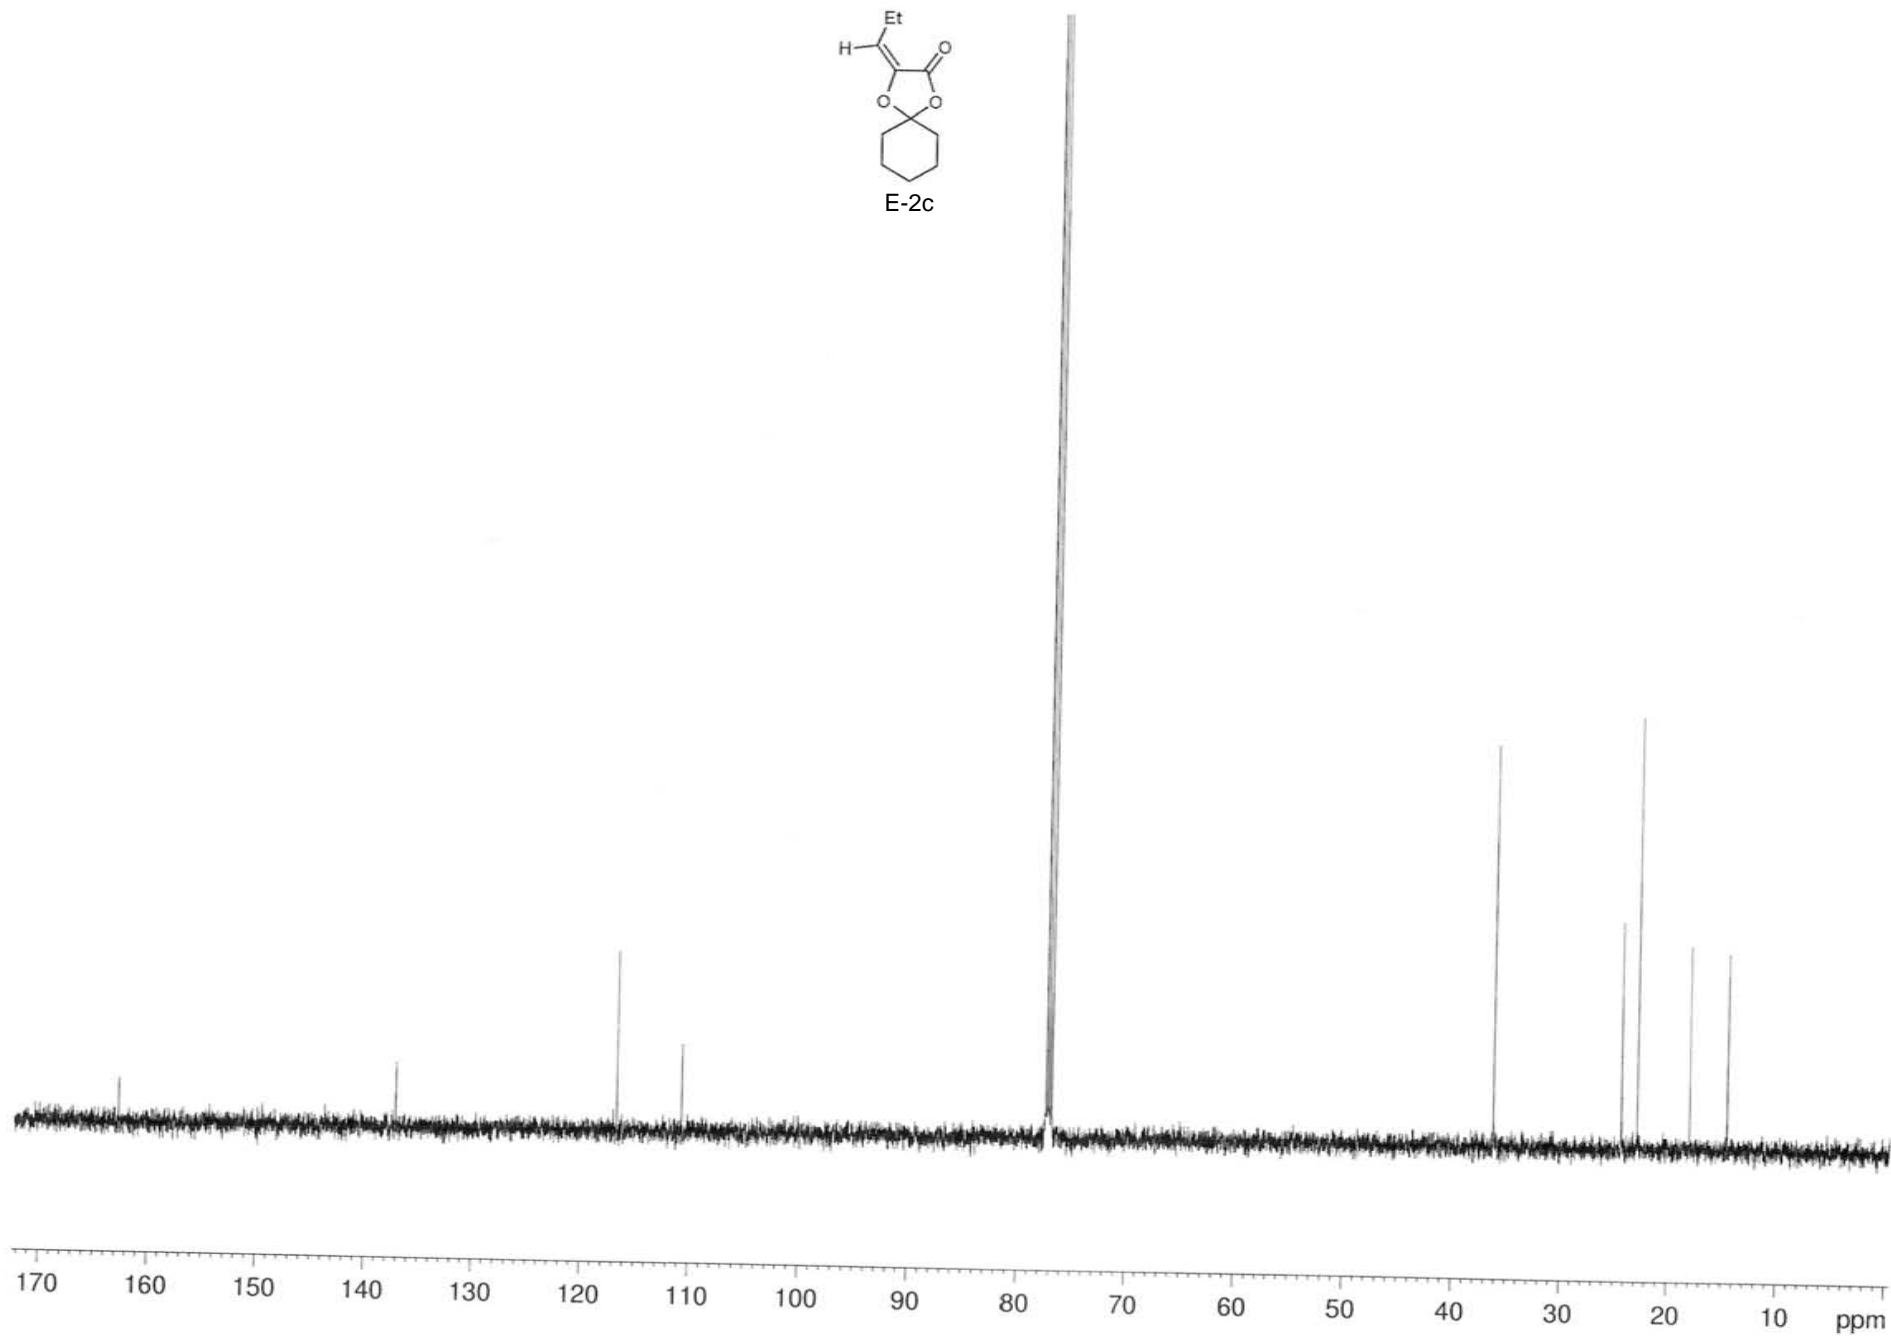

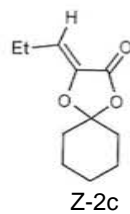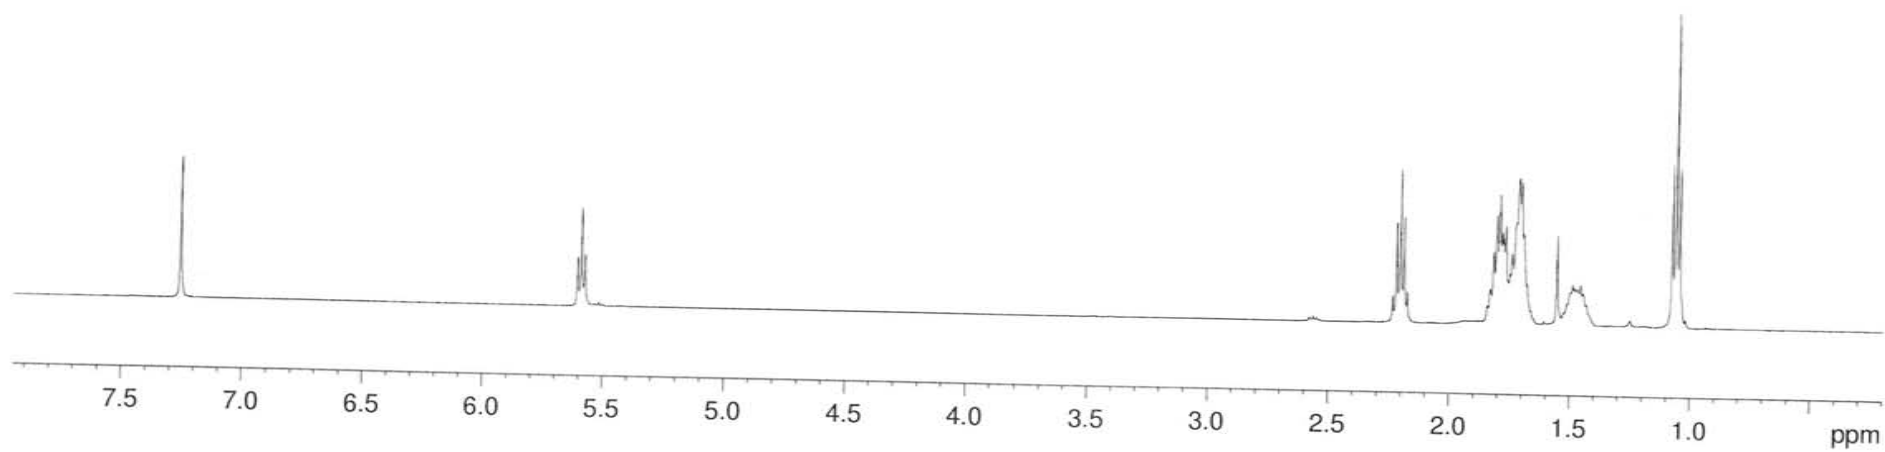

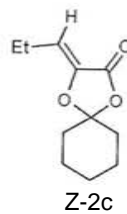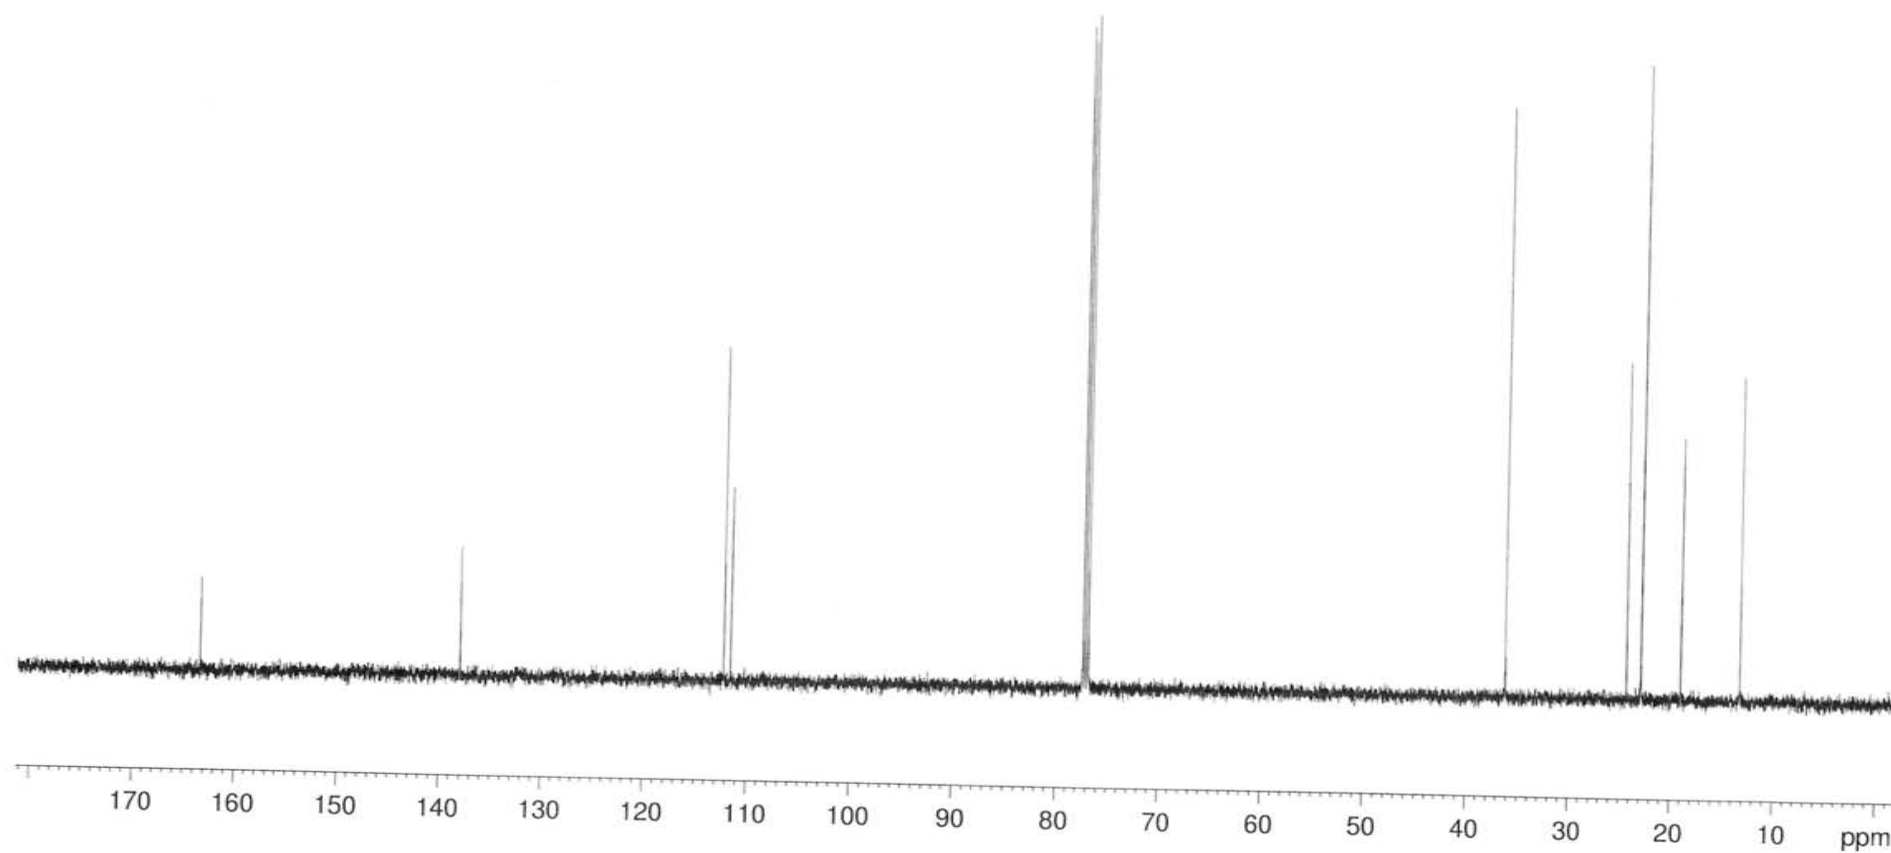

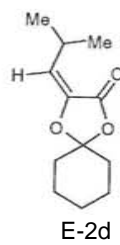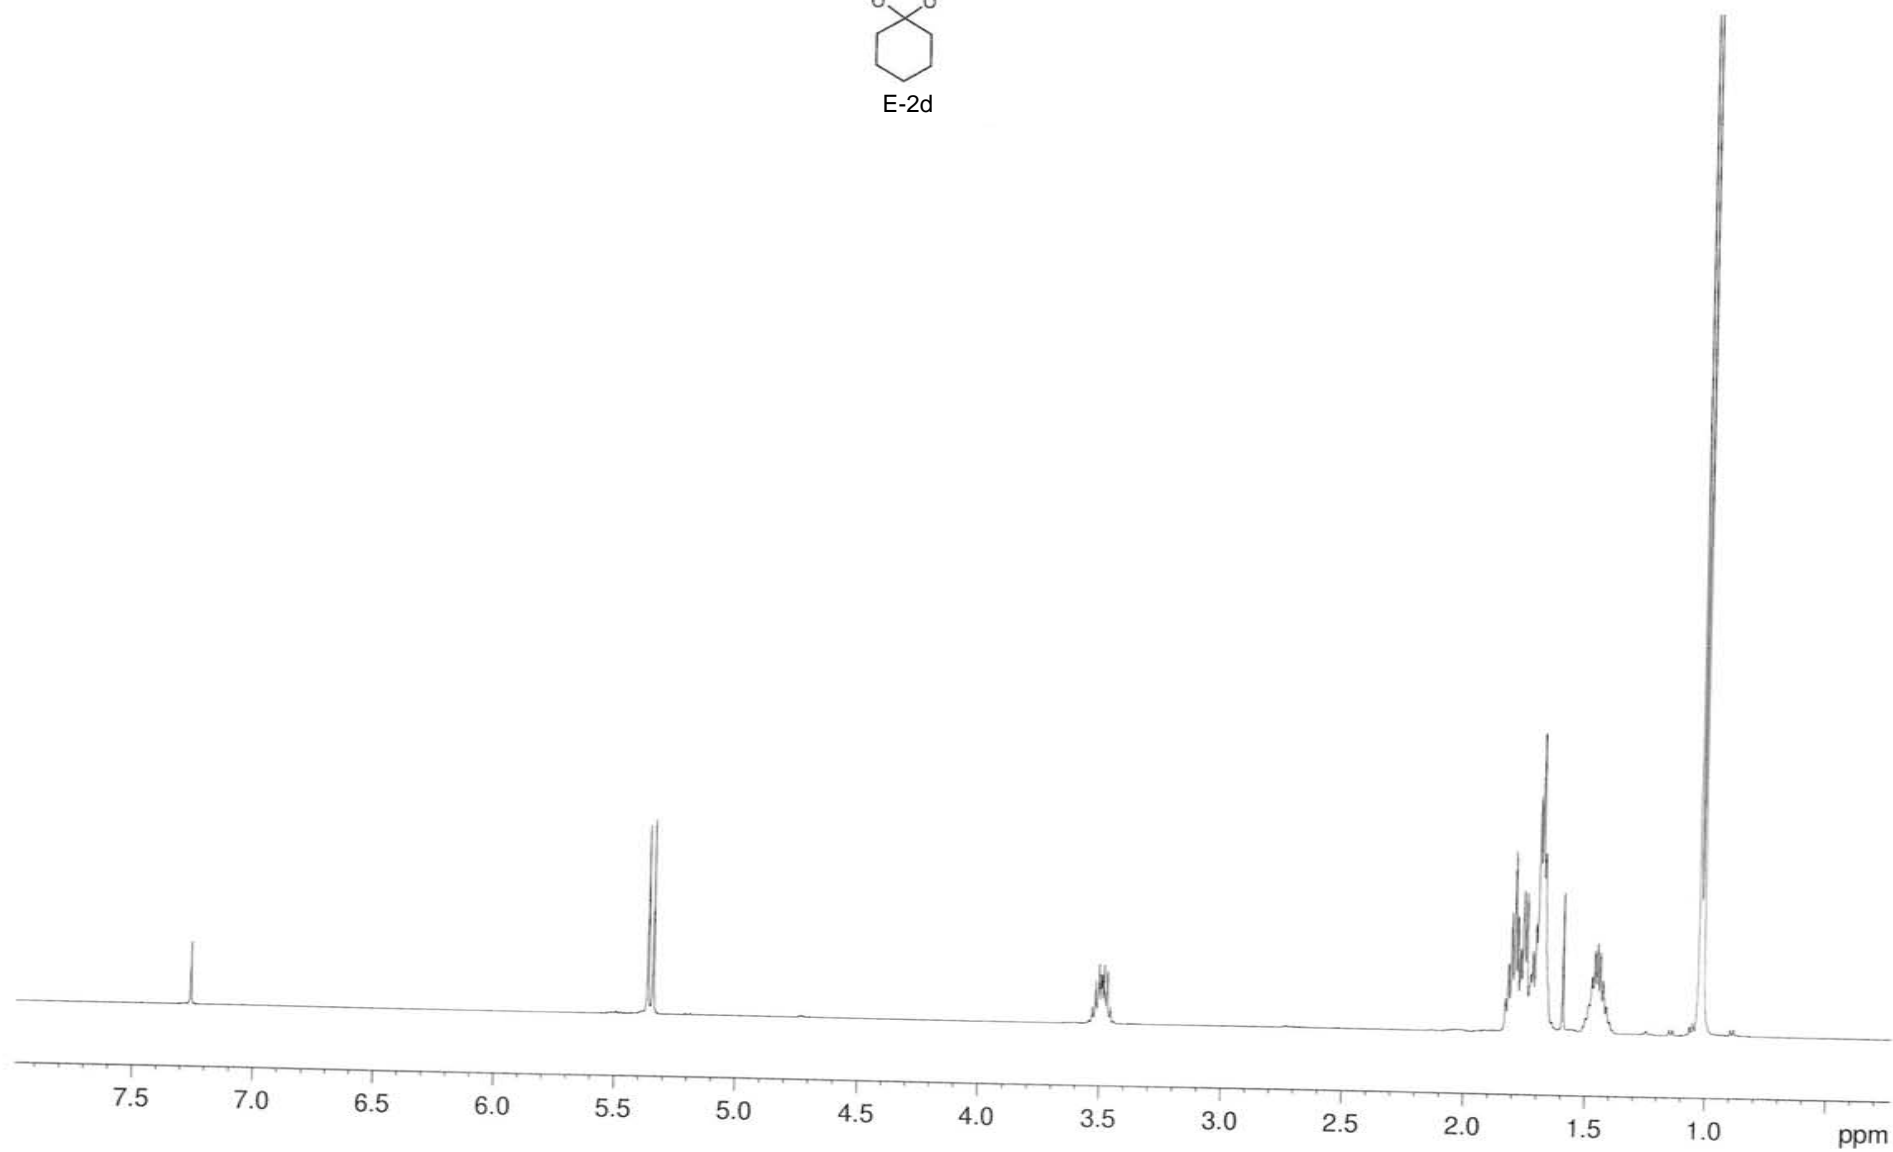

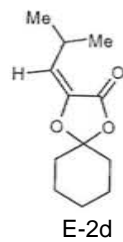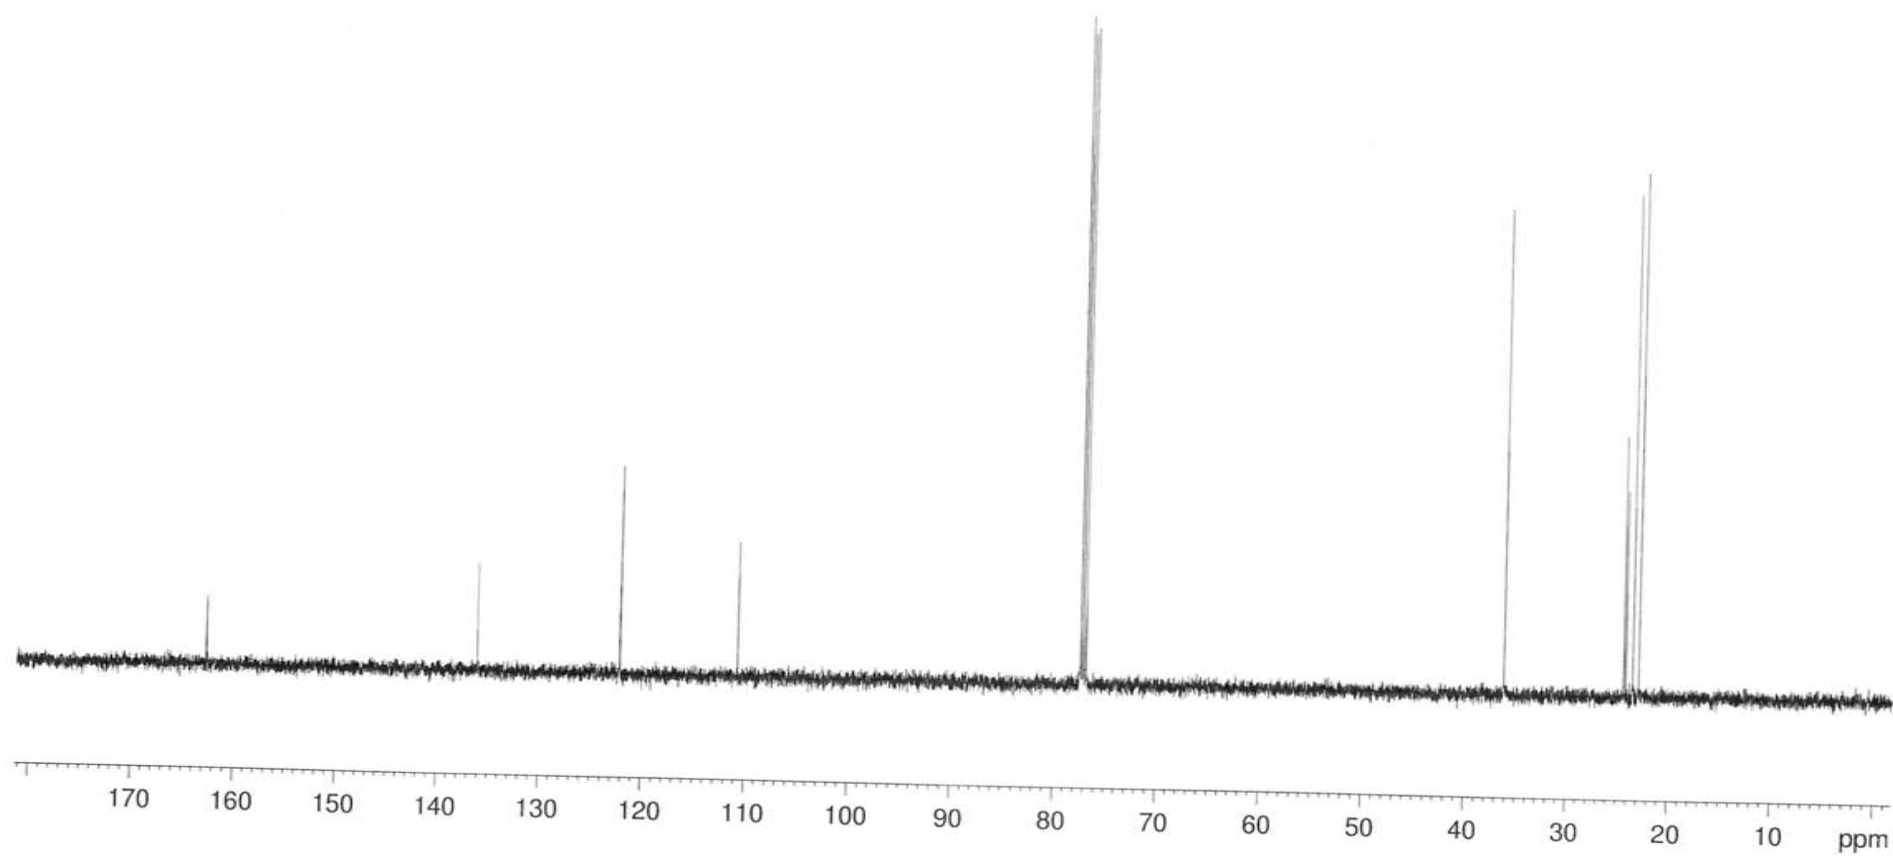

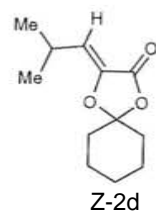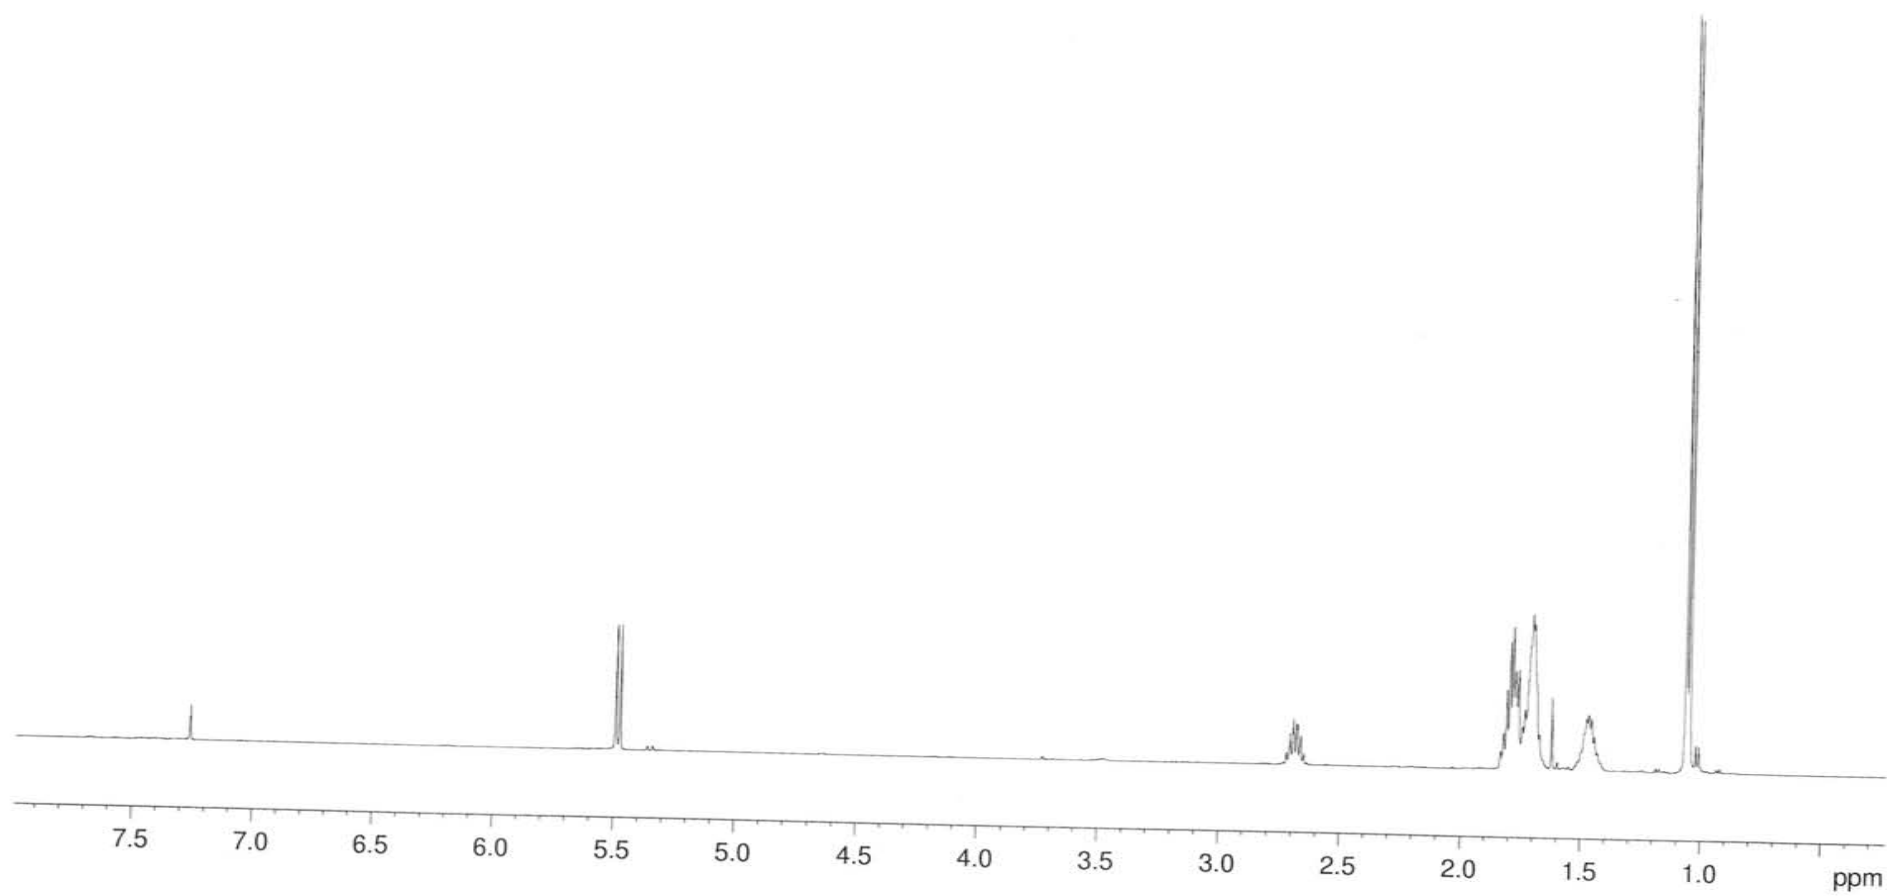

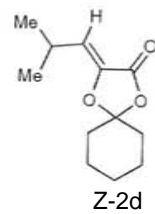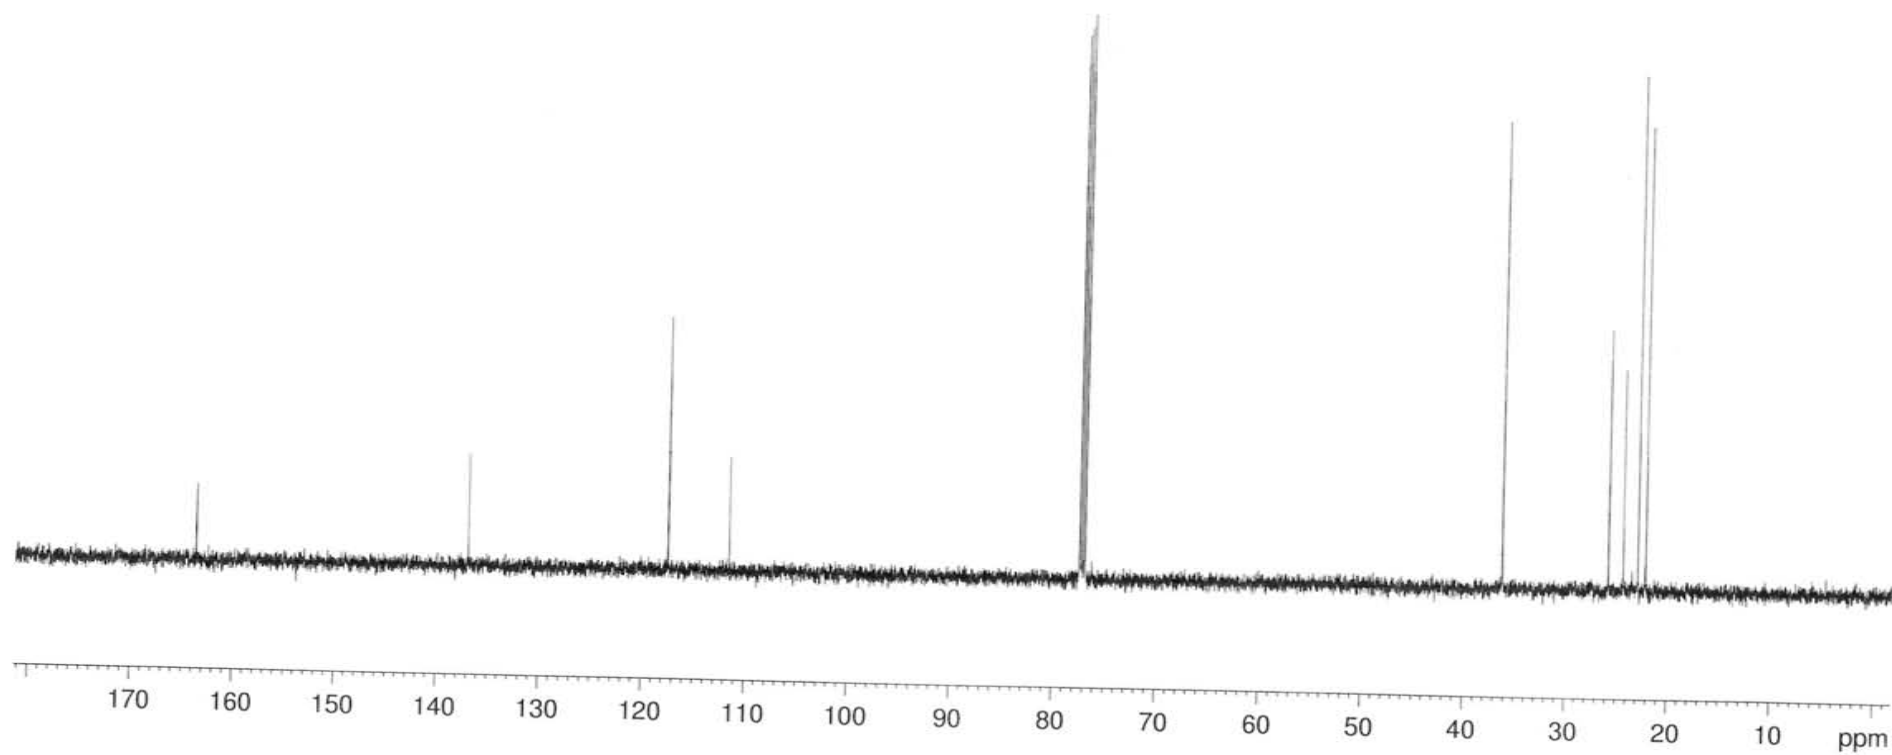



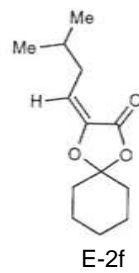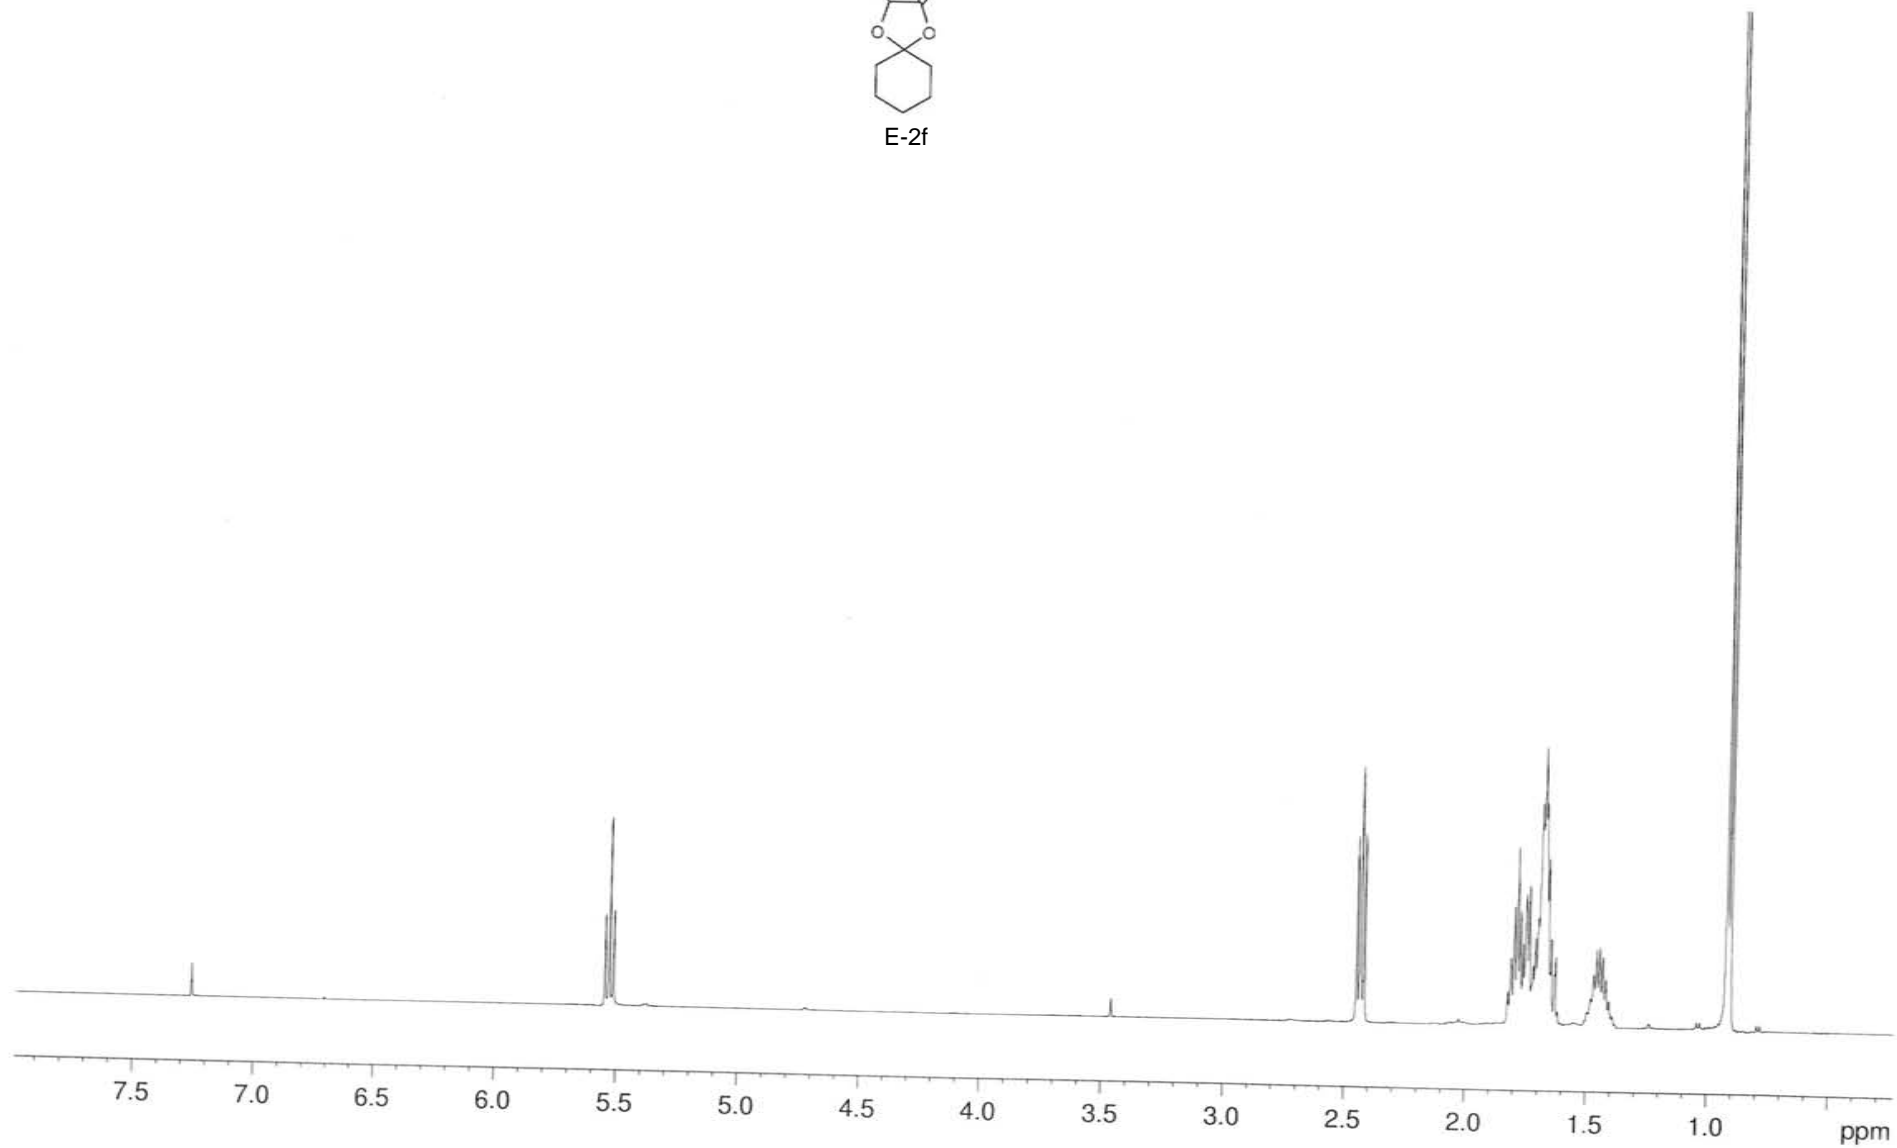

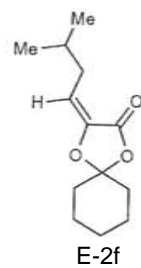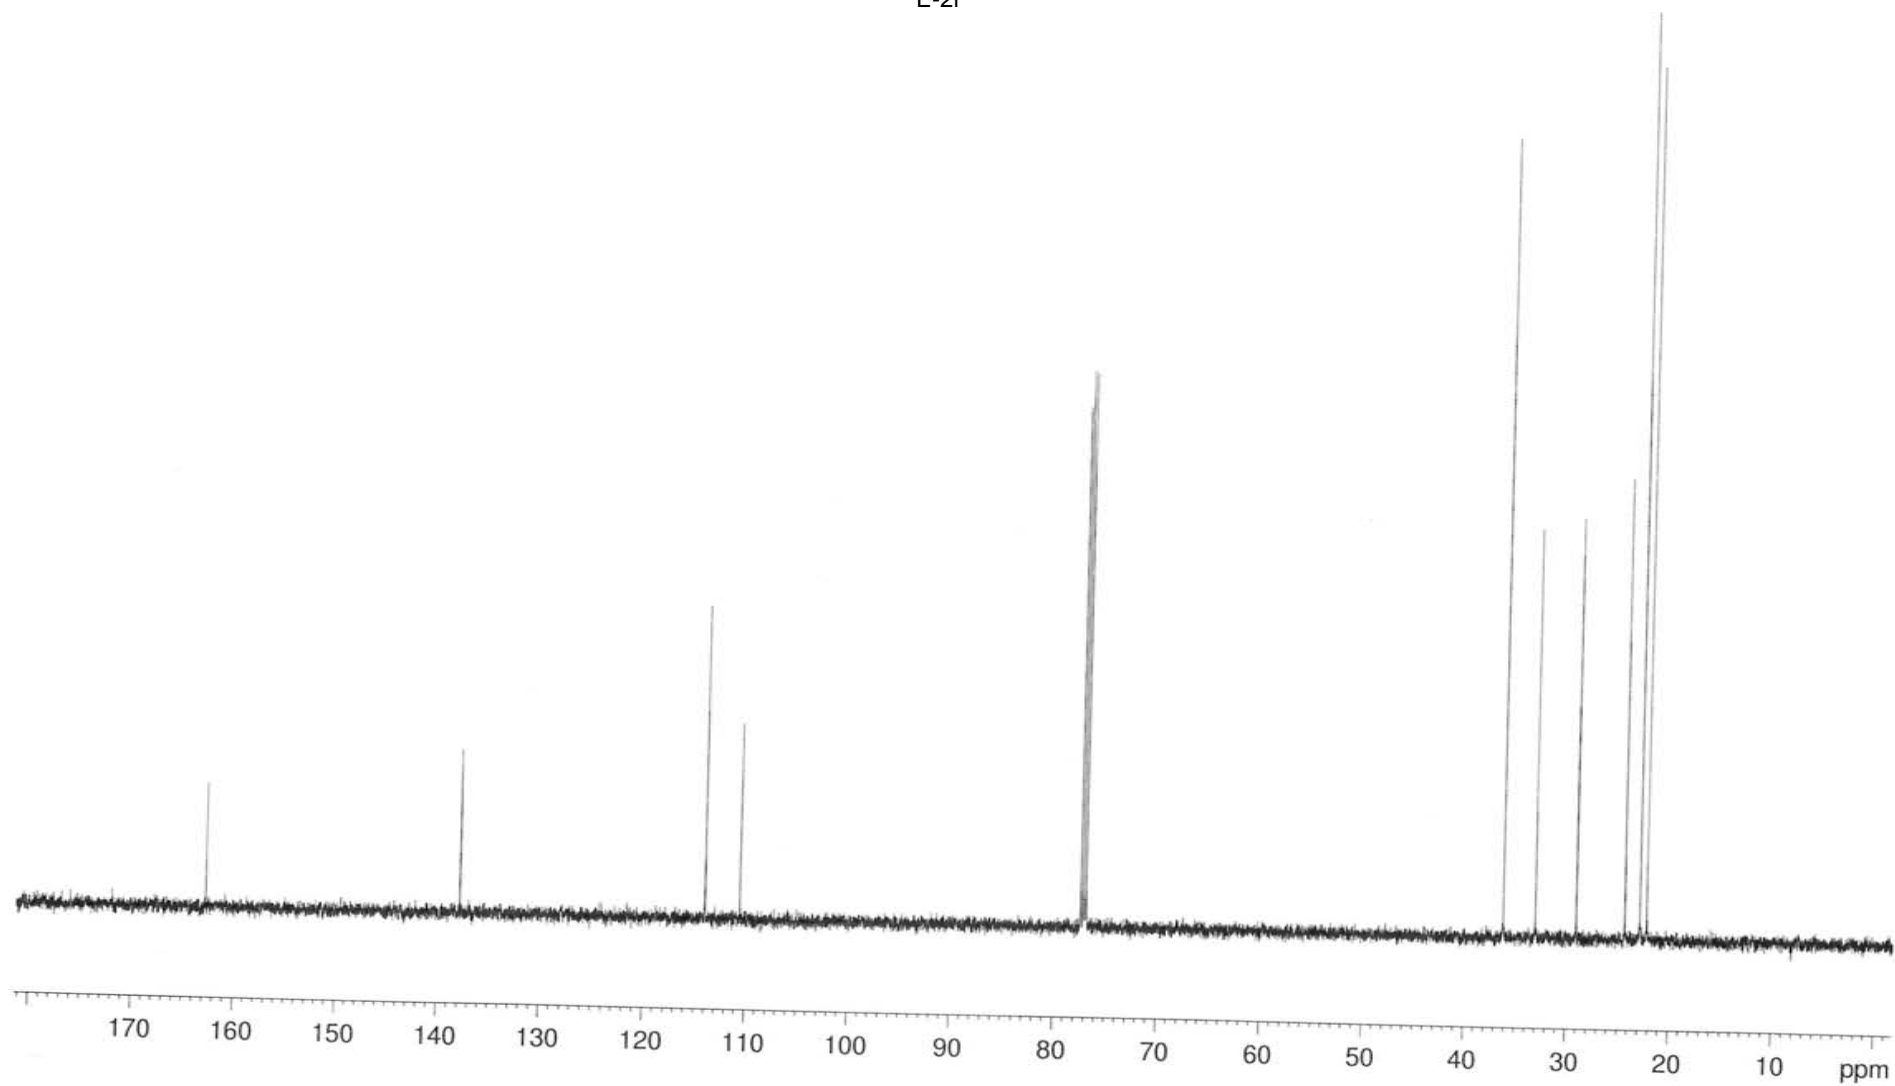

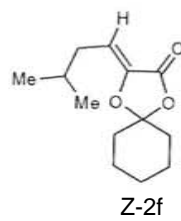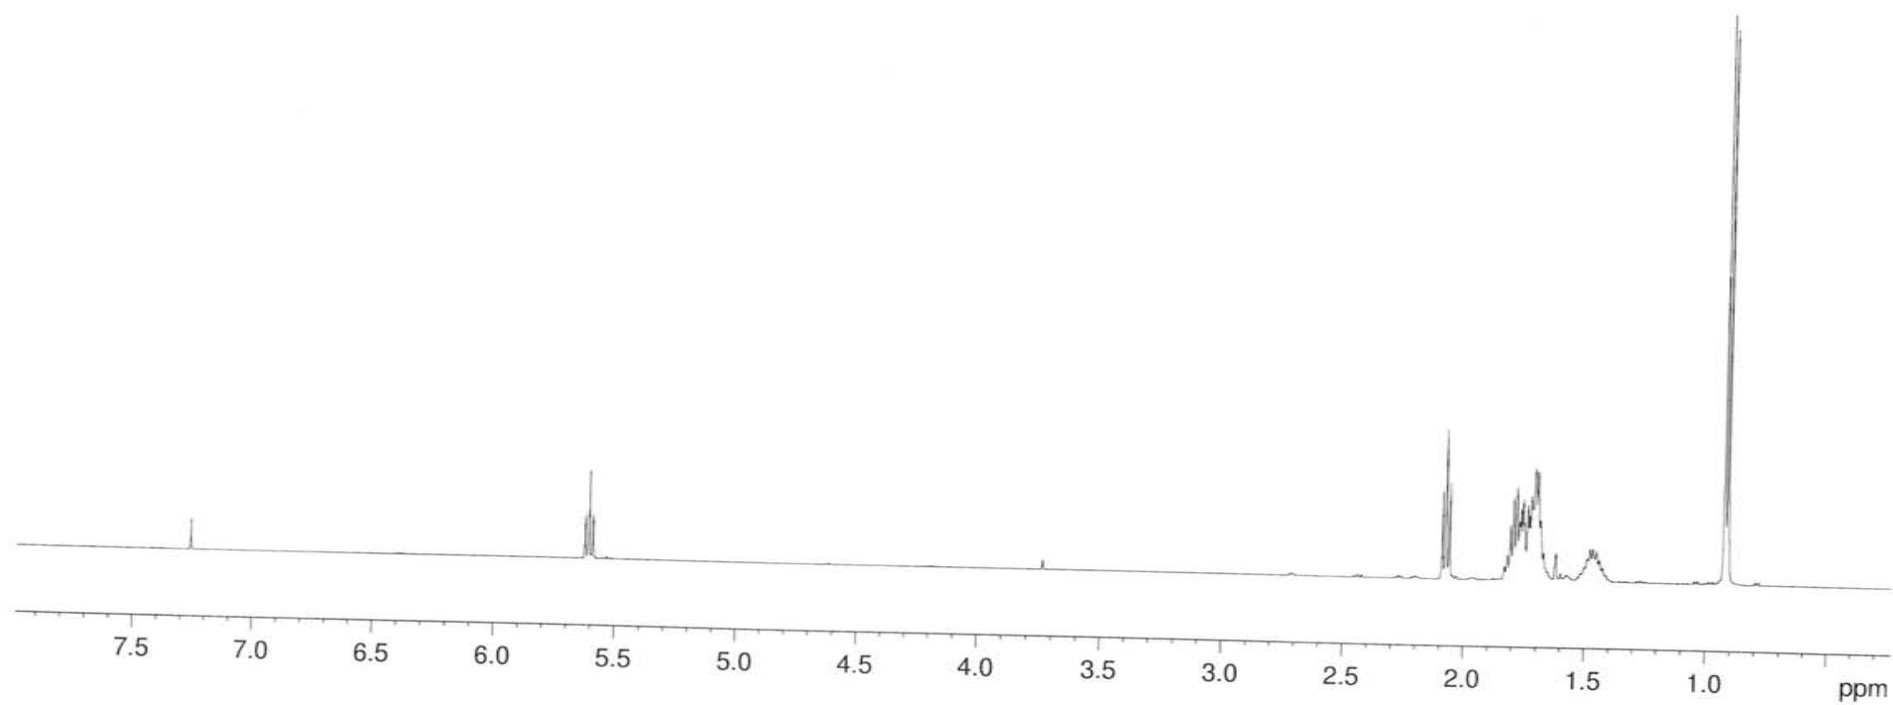

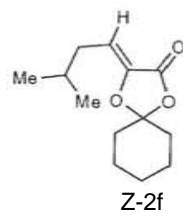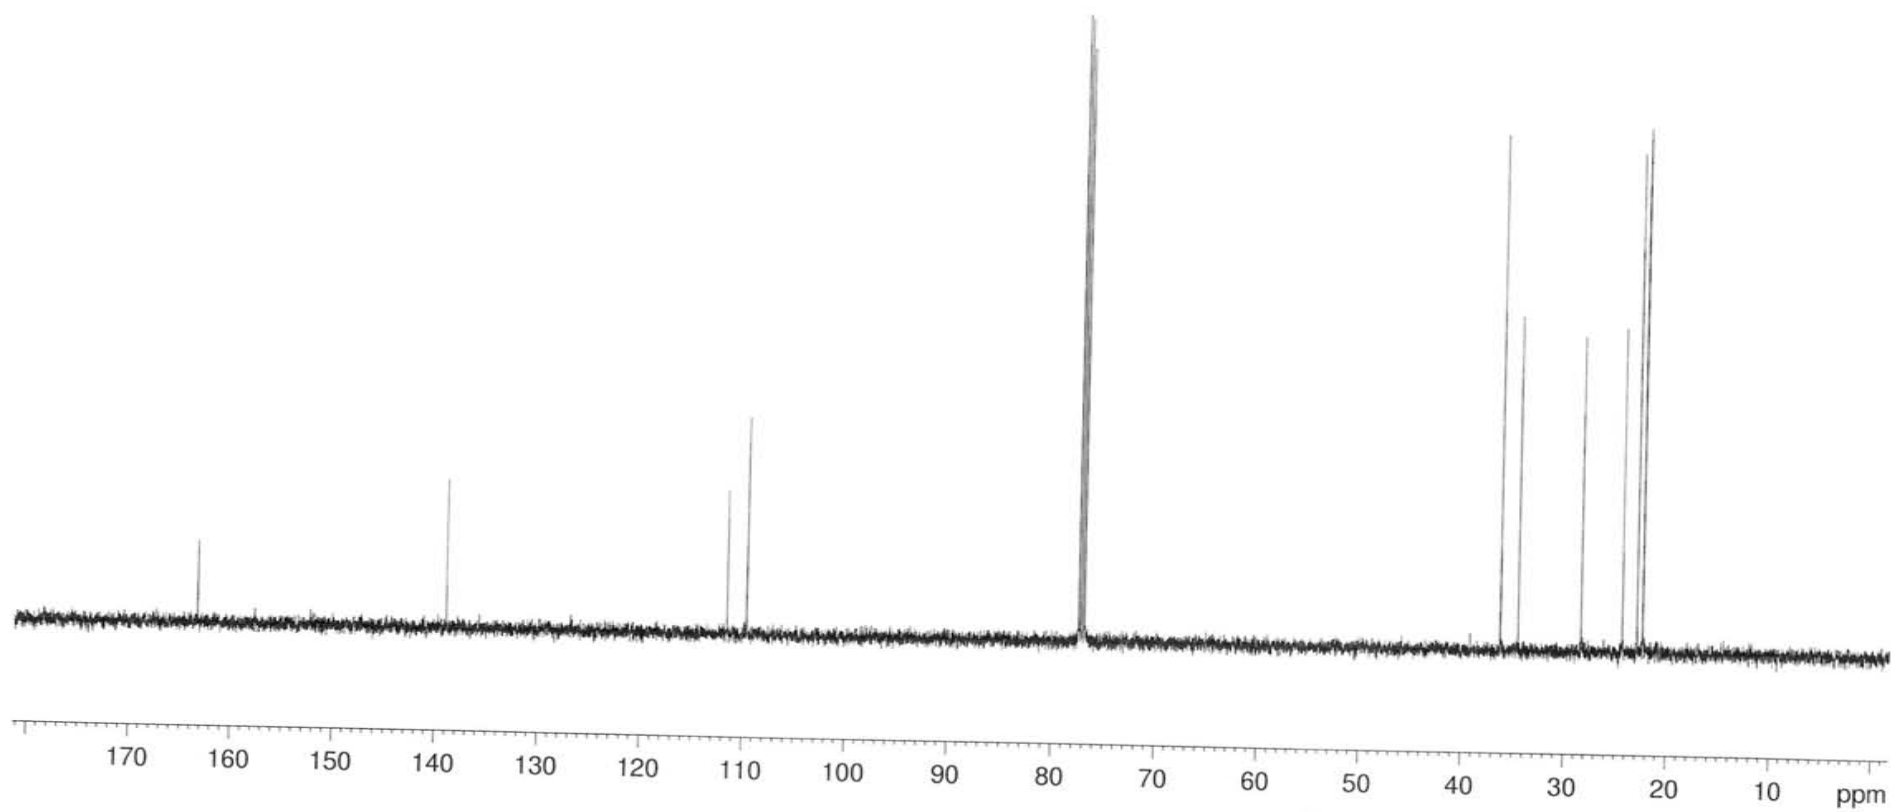

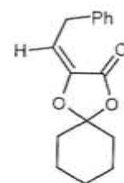

E-2e

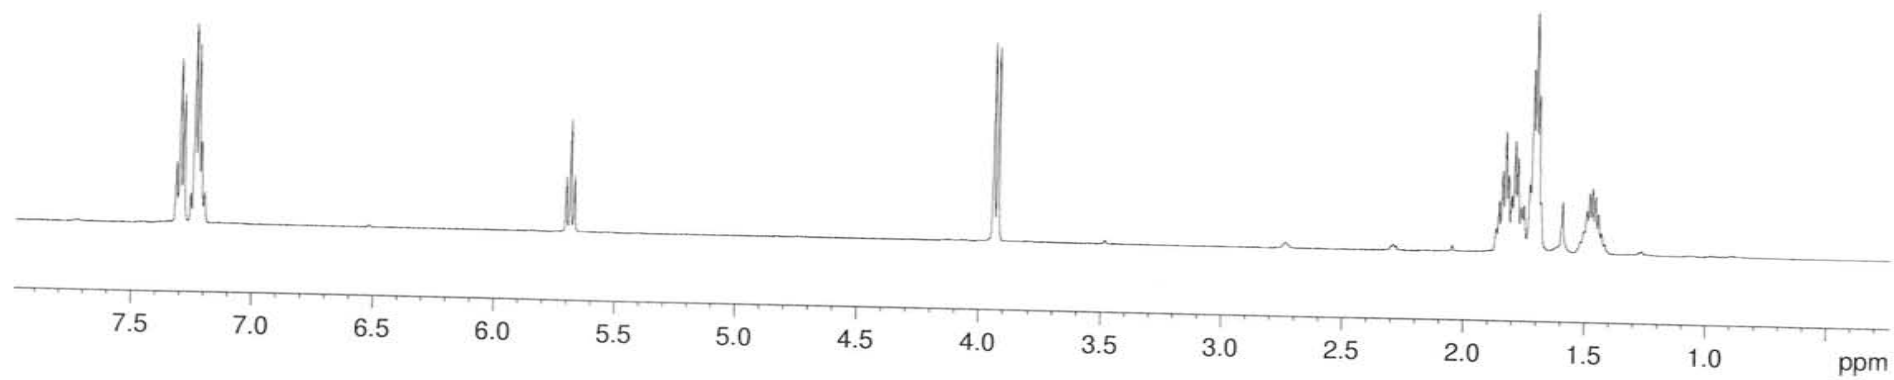

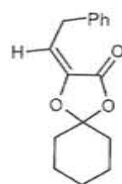

E-2e

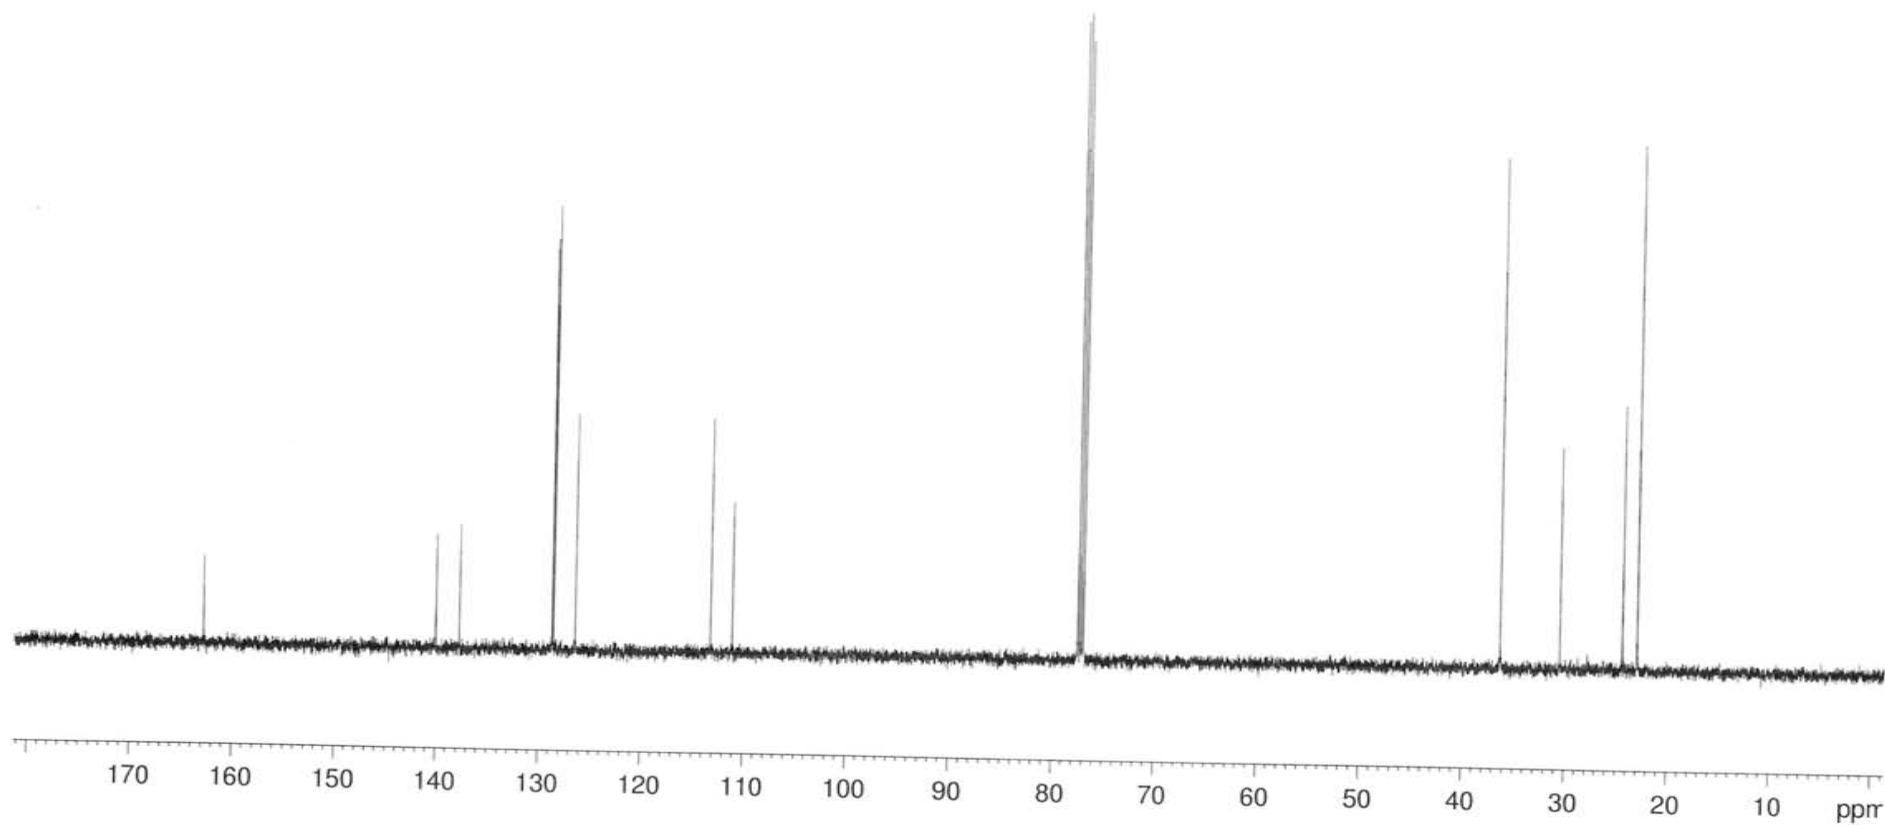

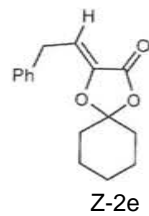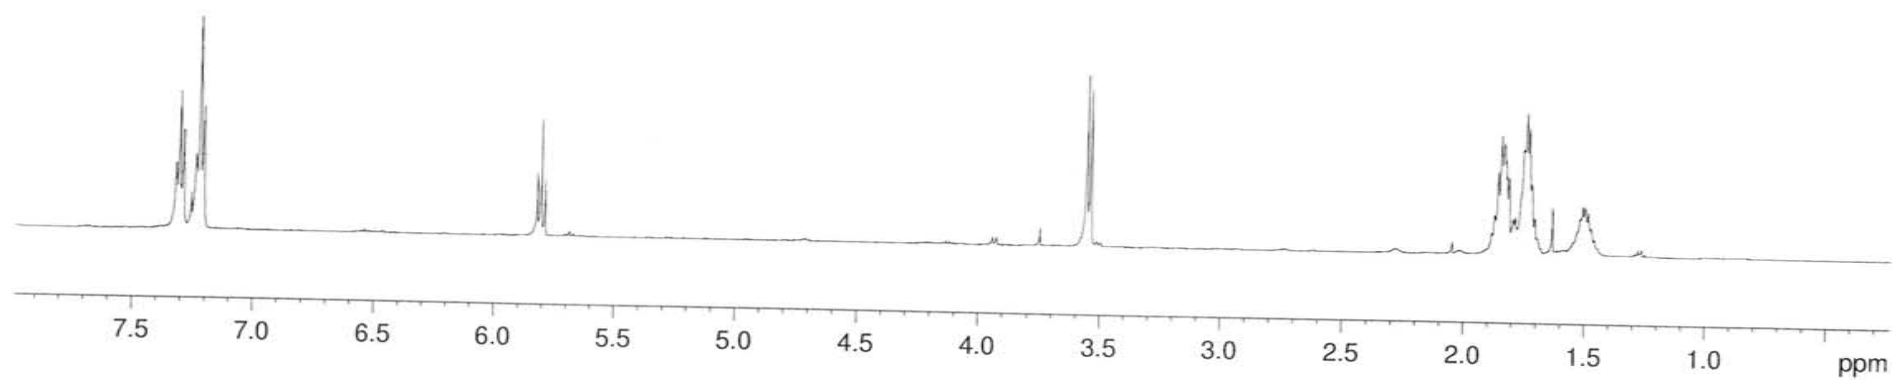

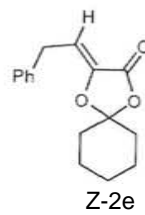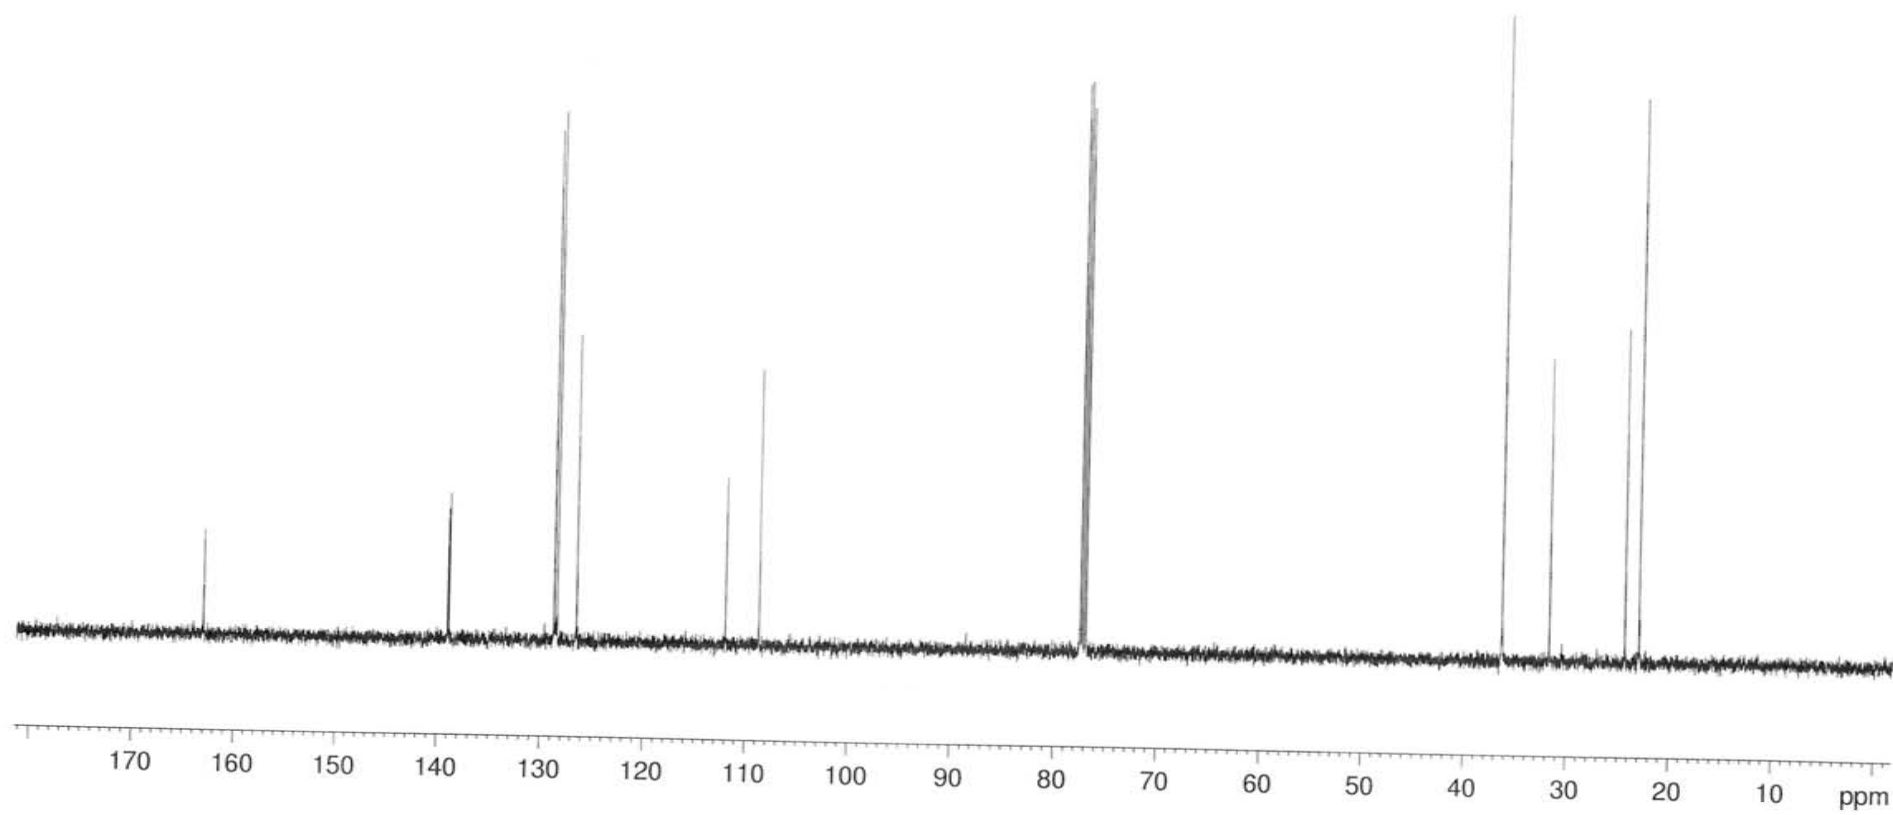



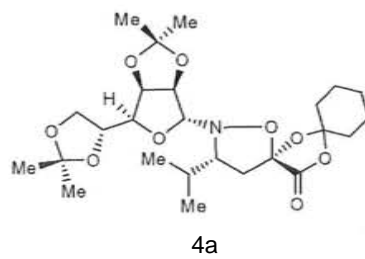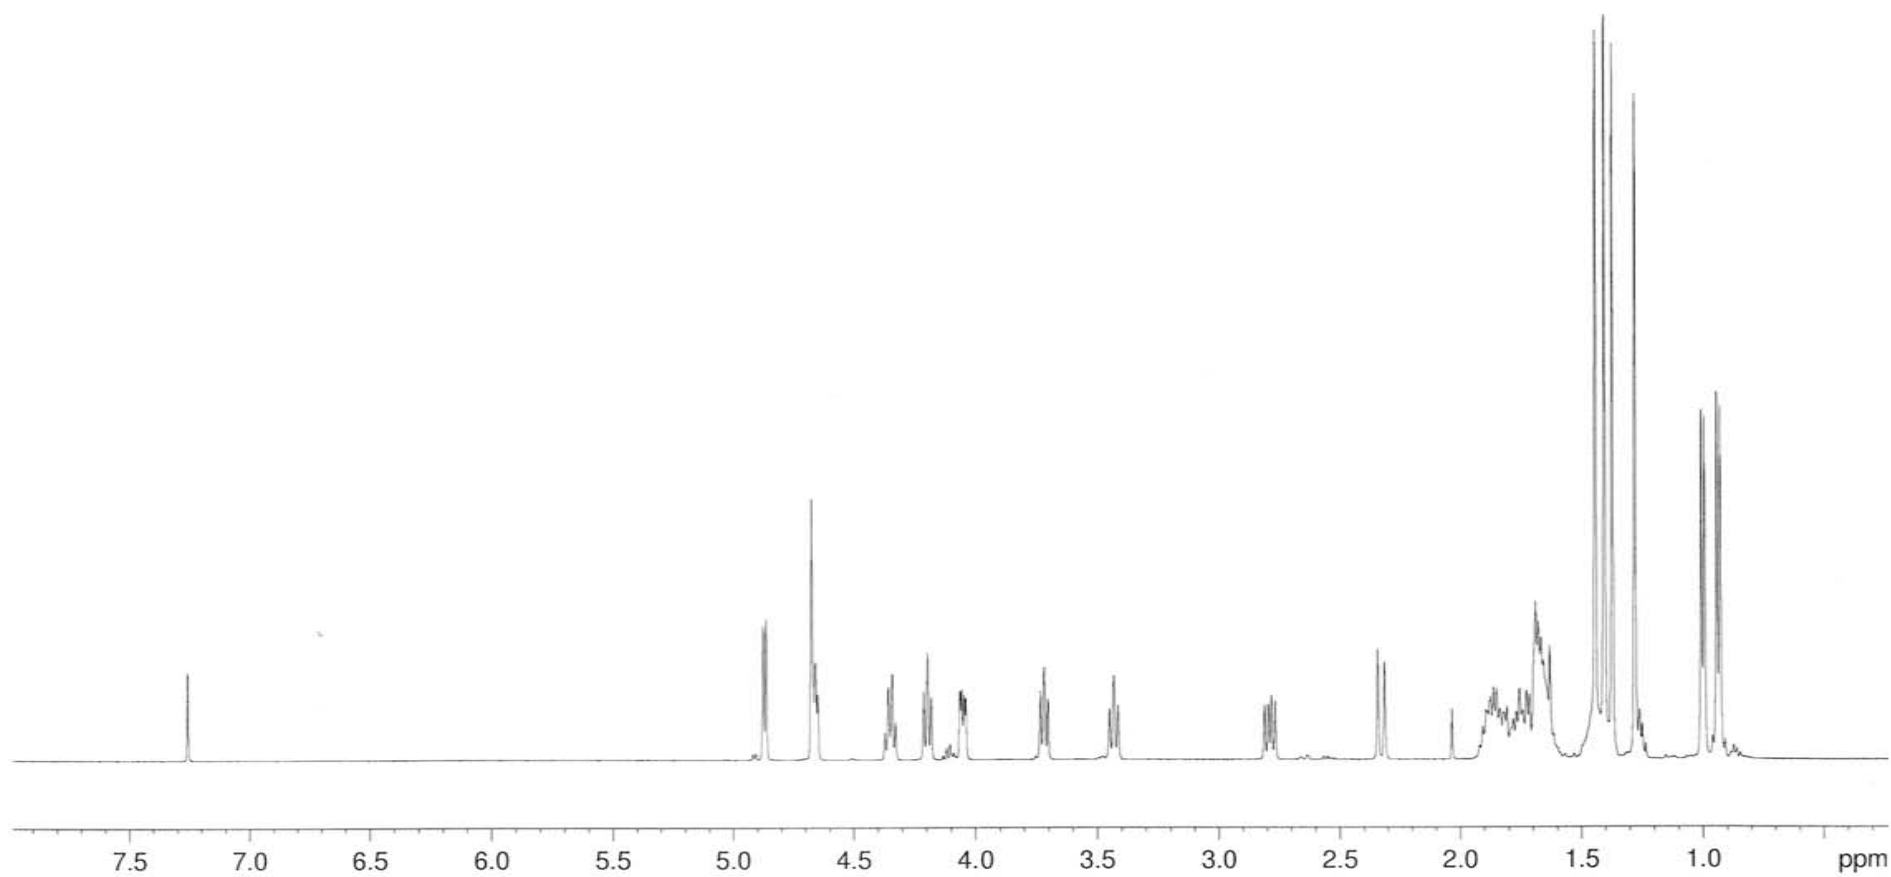

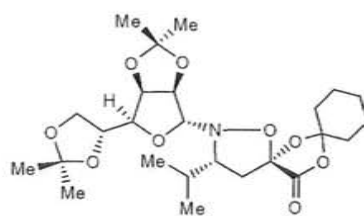

4a

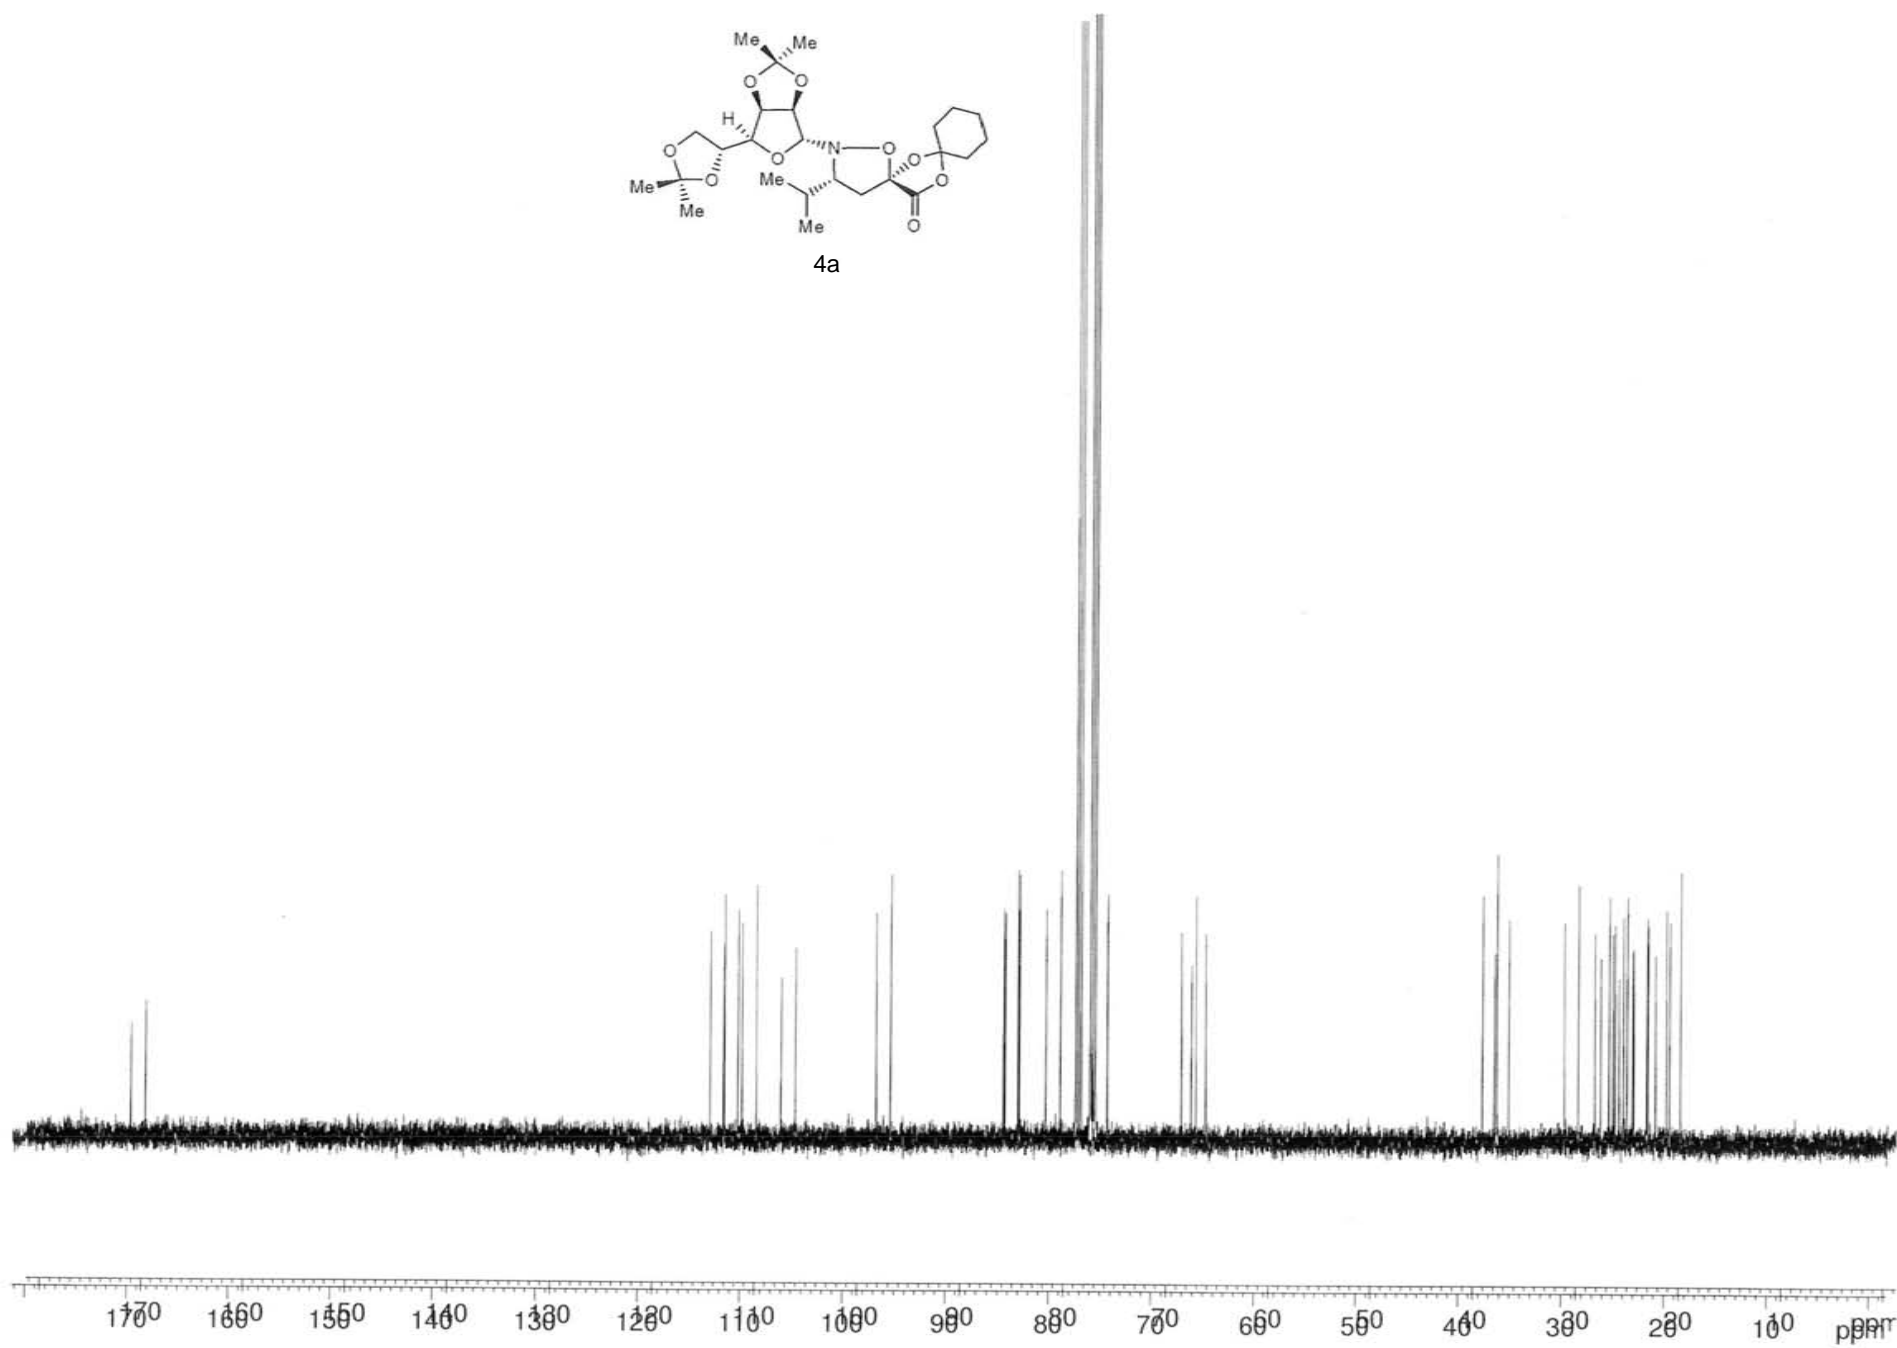

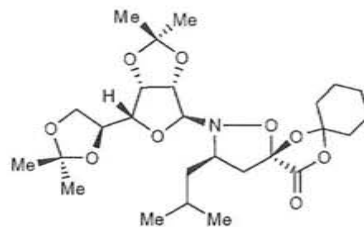

4b

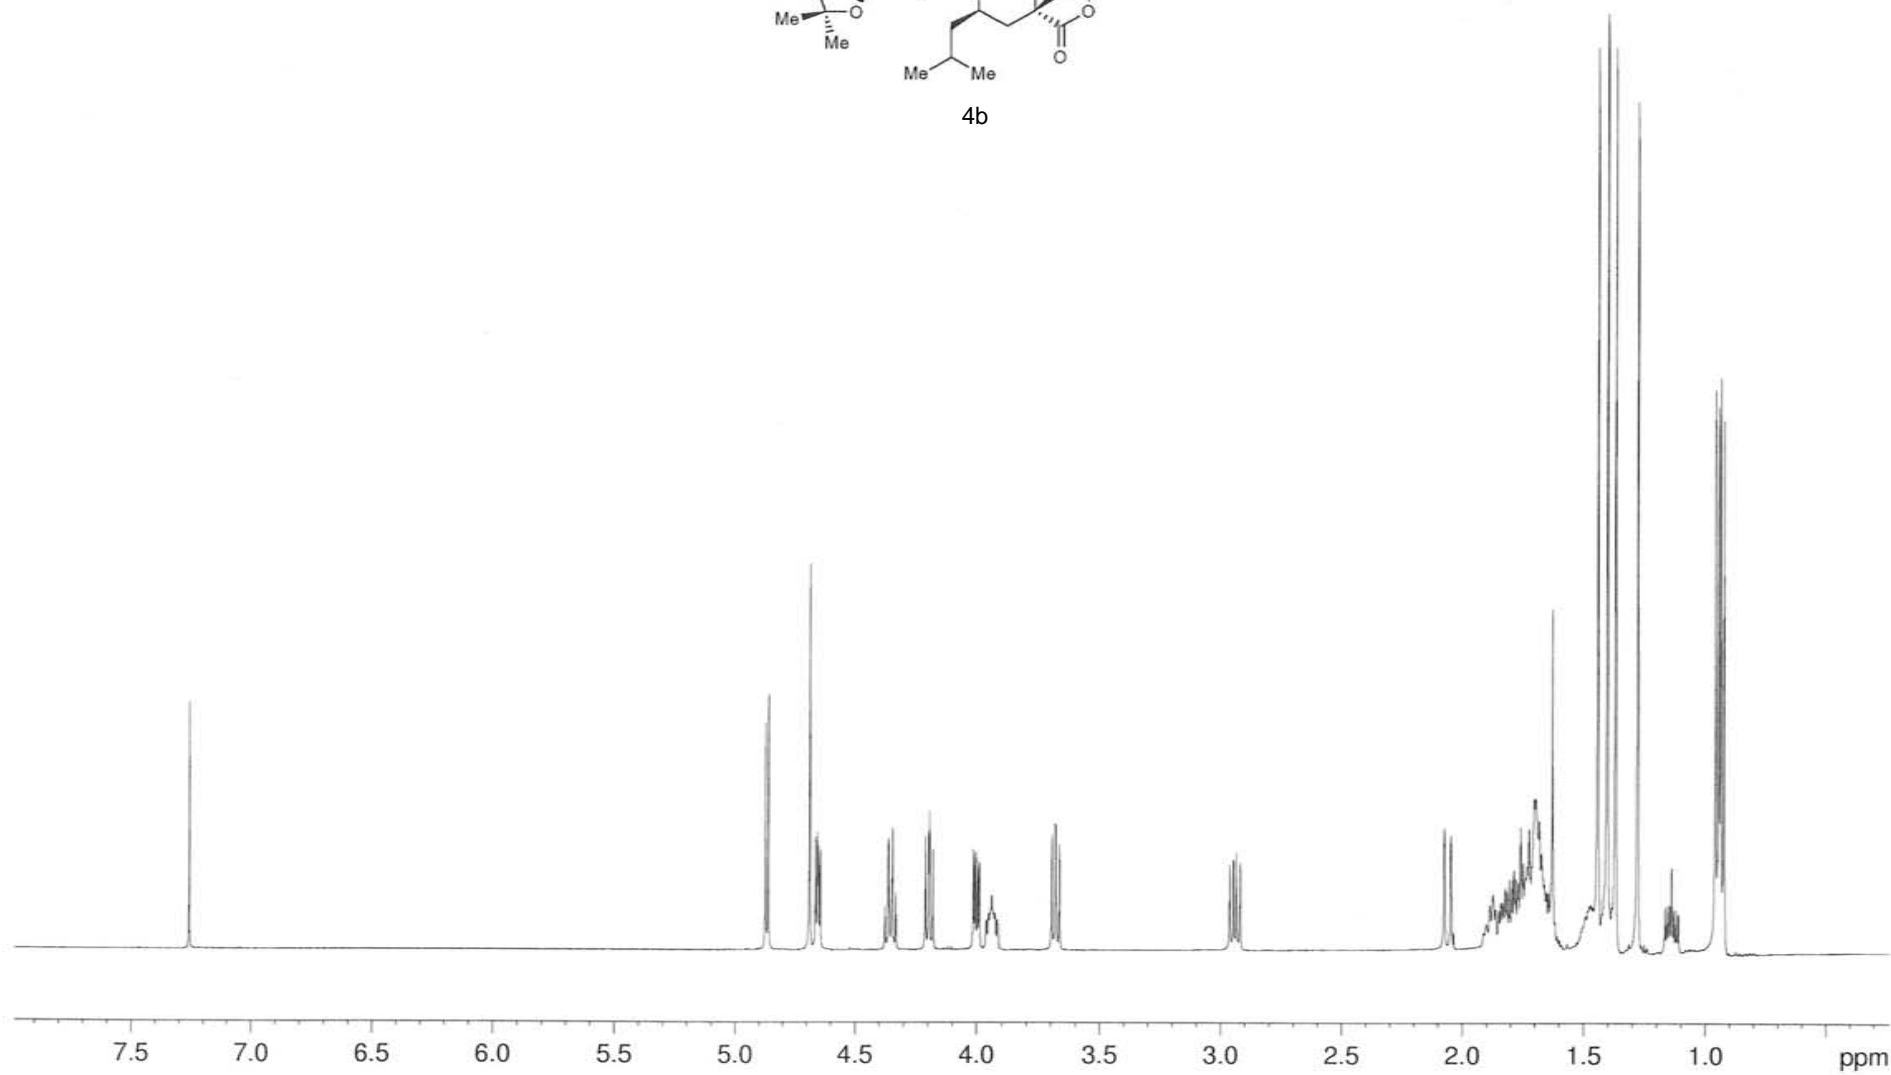

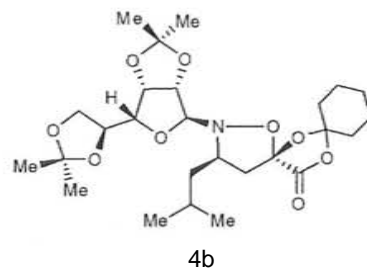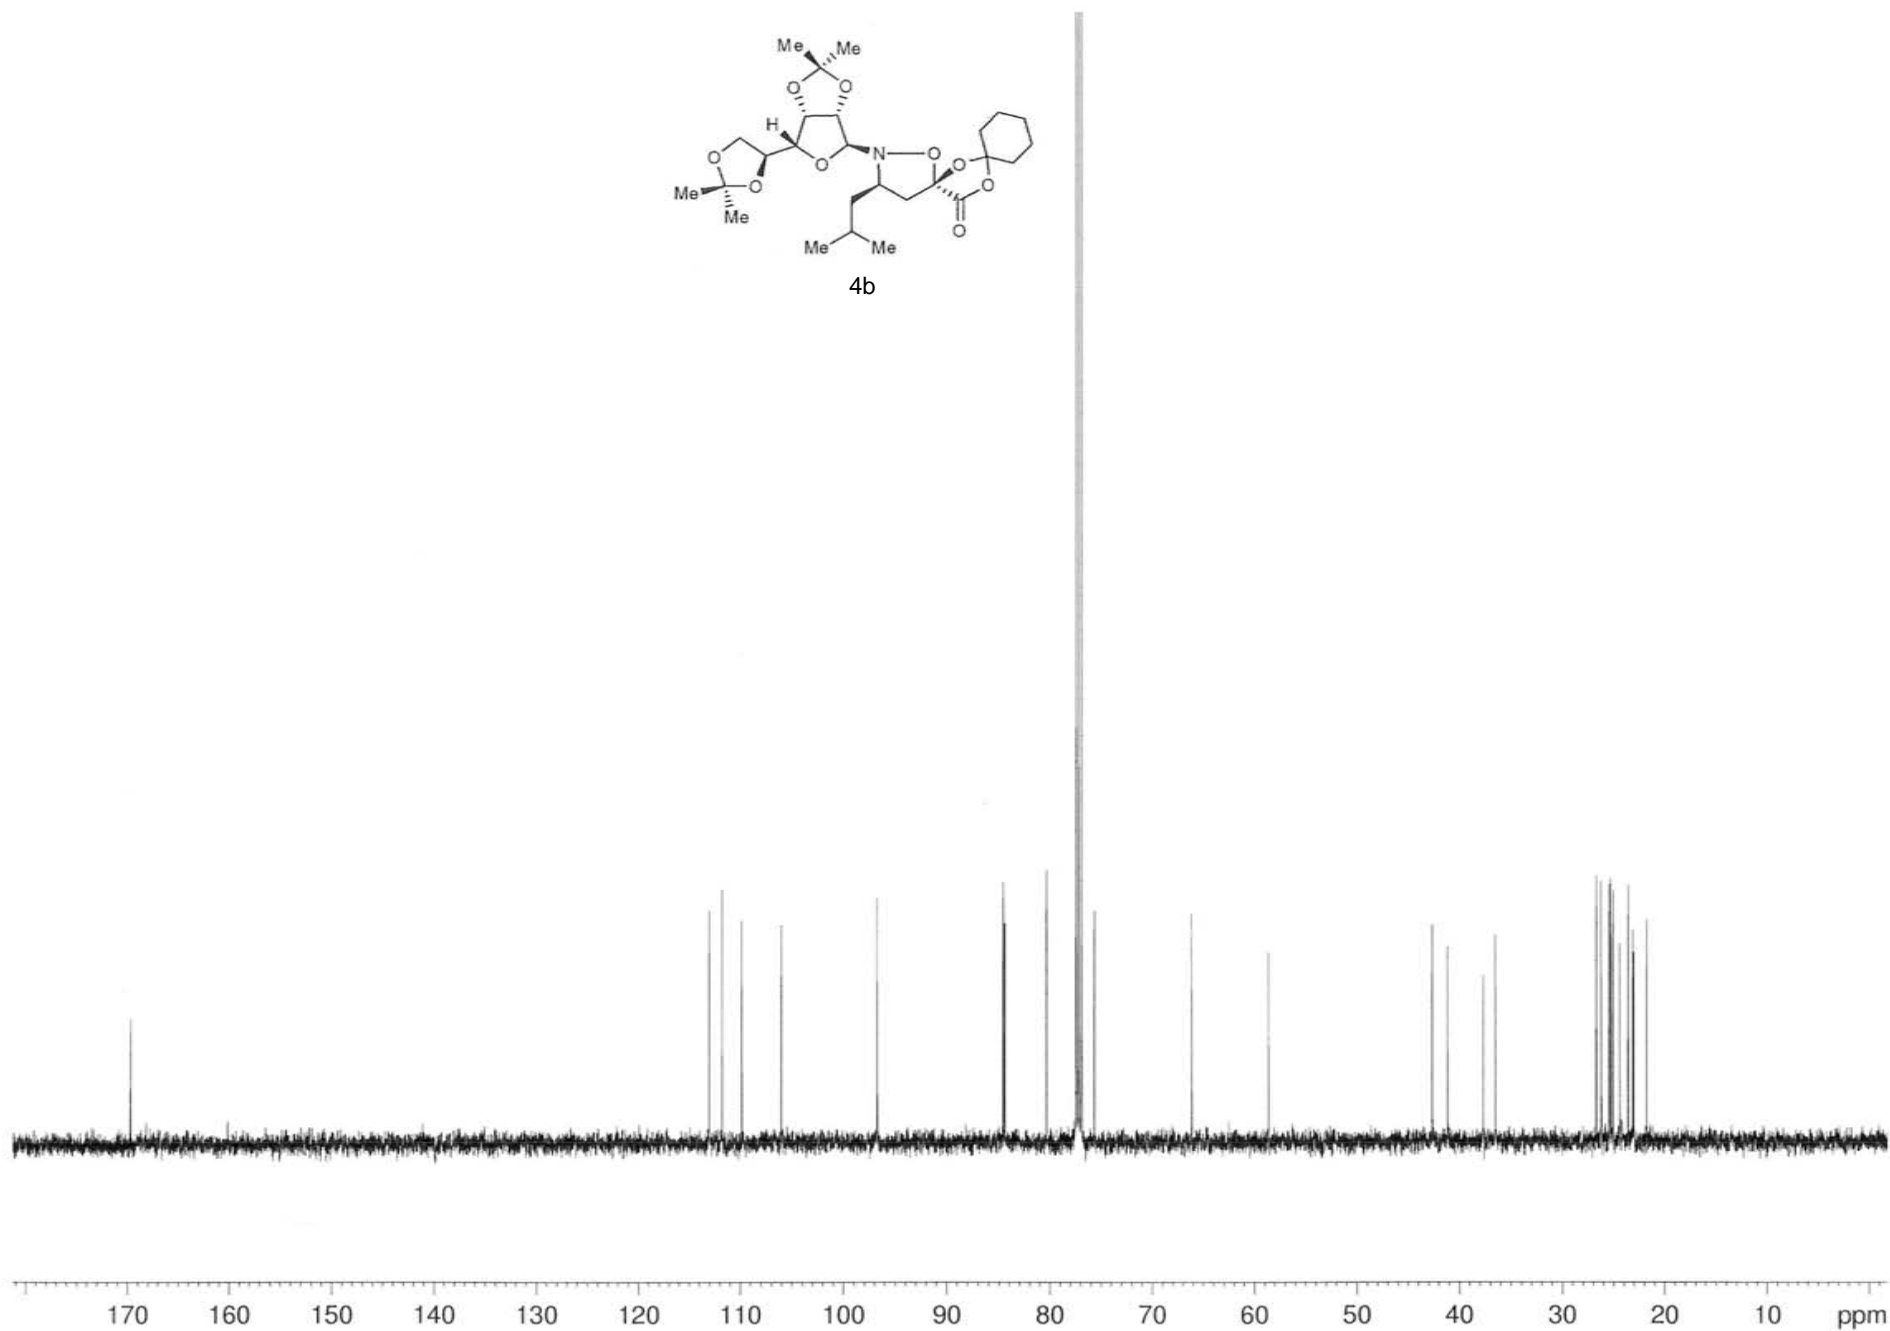

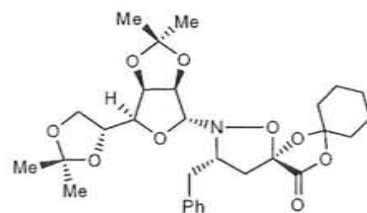

4c

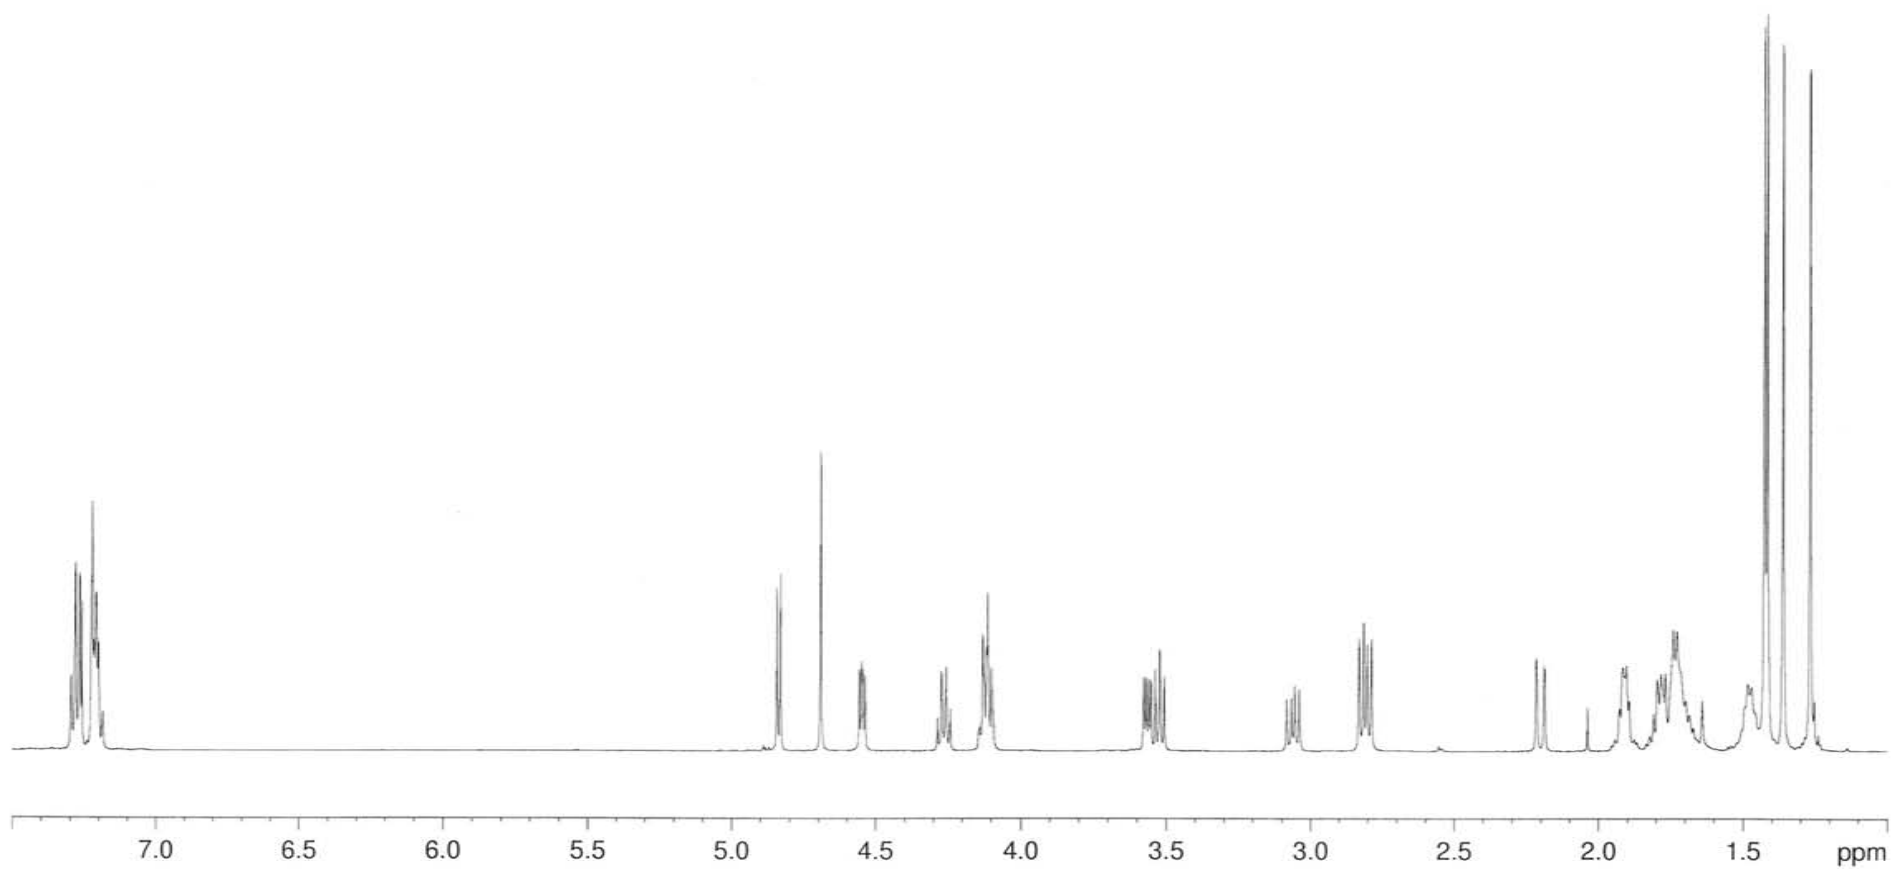

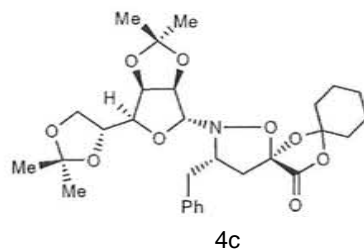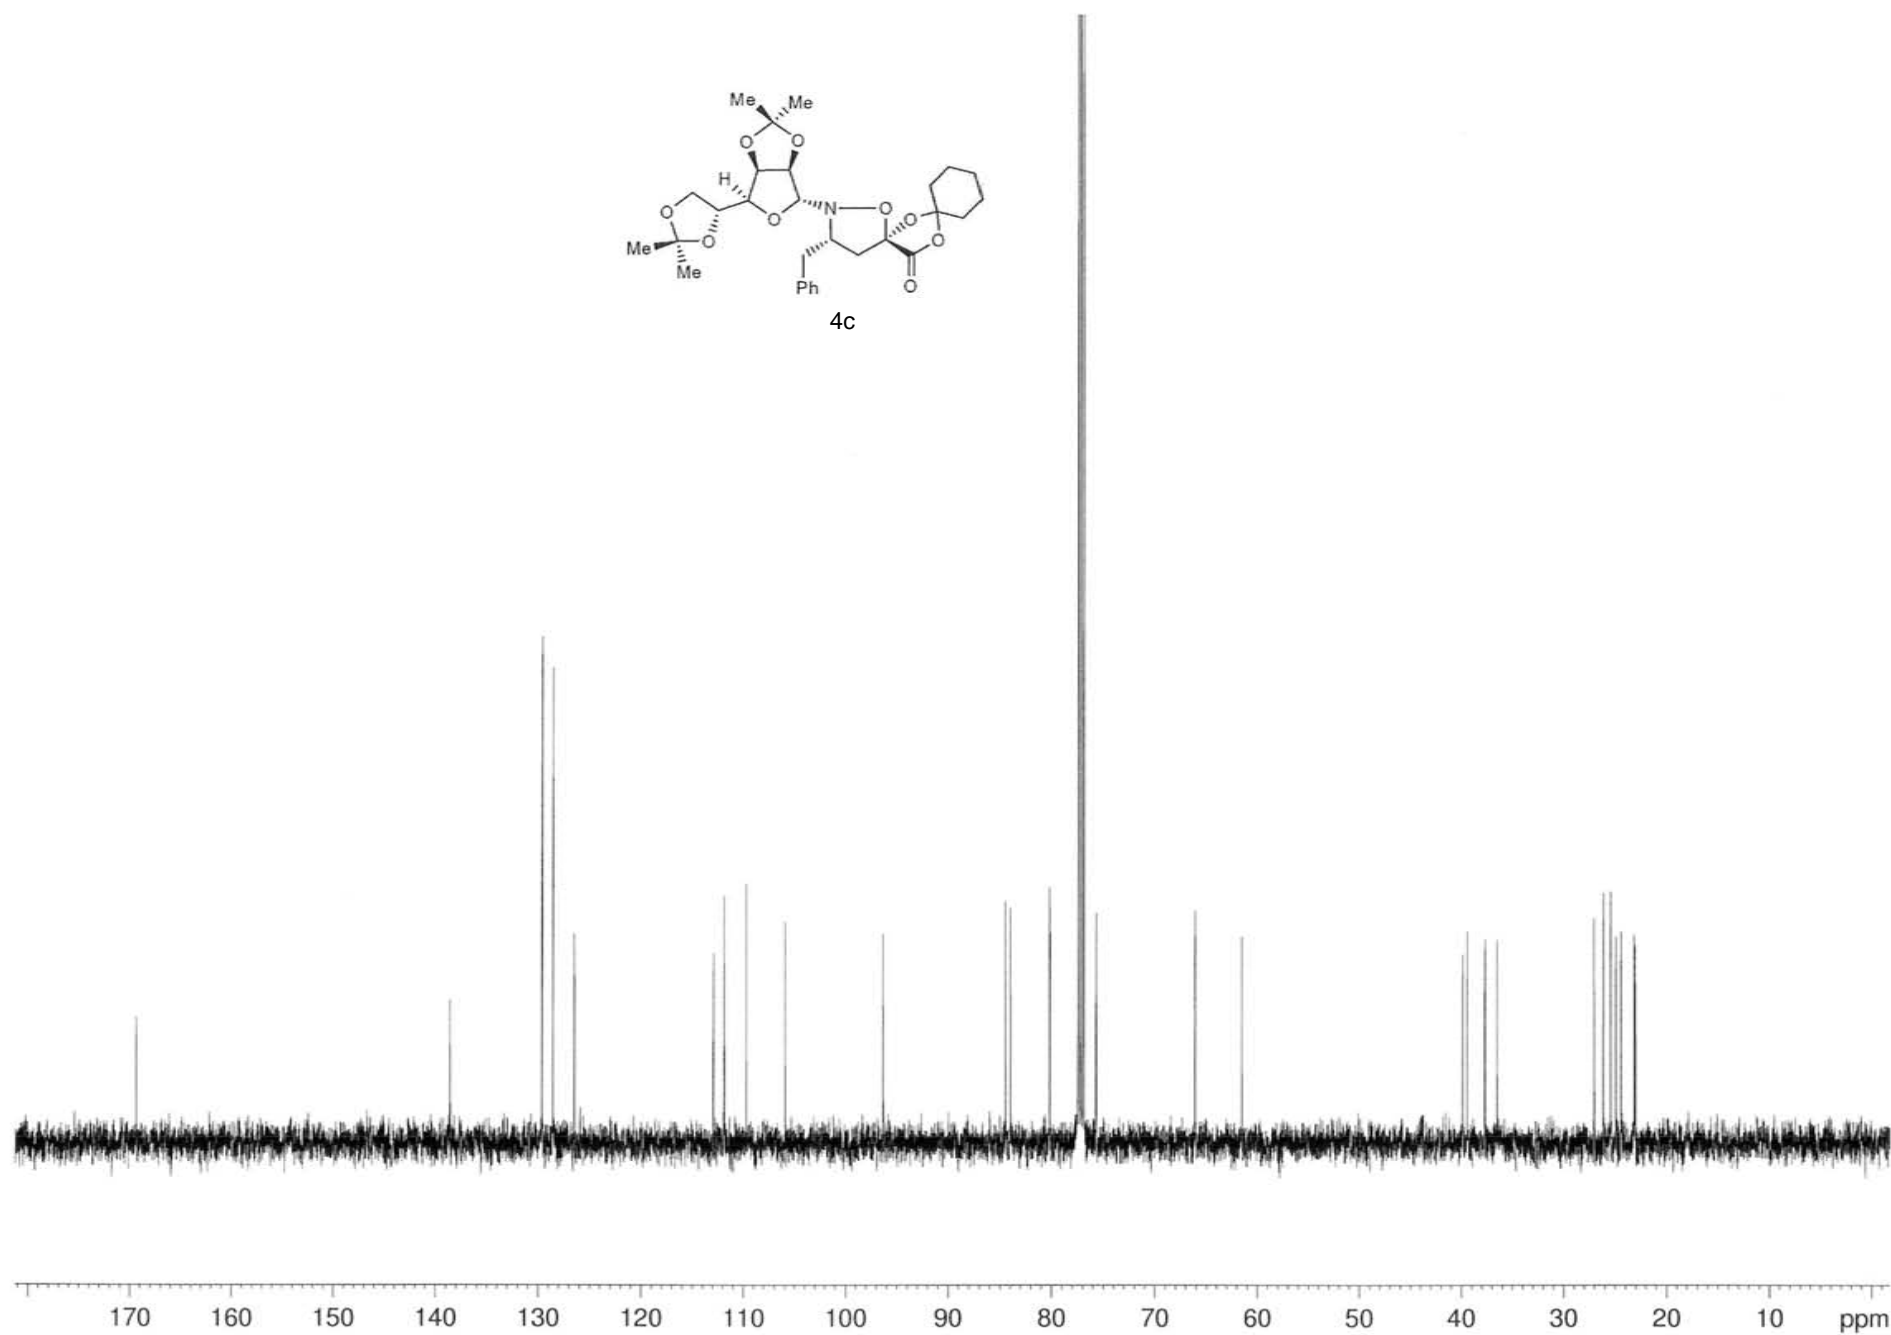

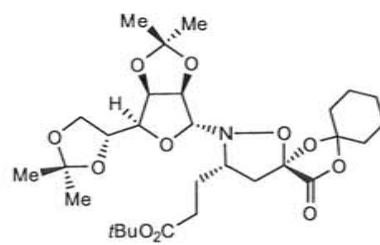

4d

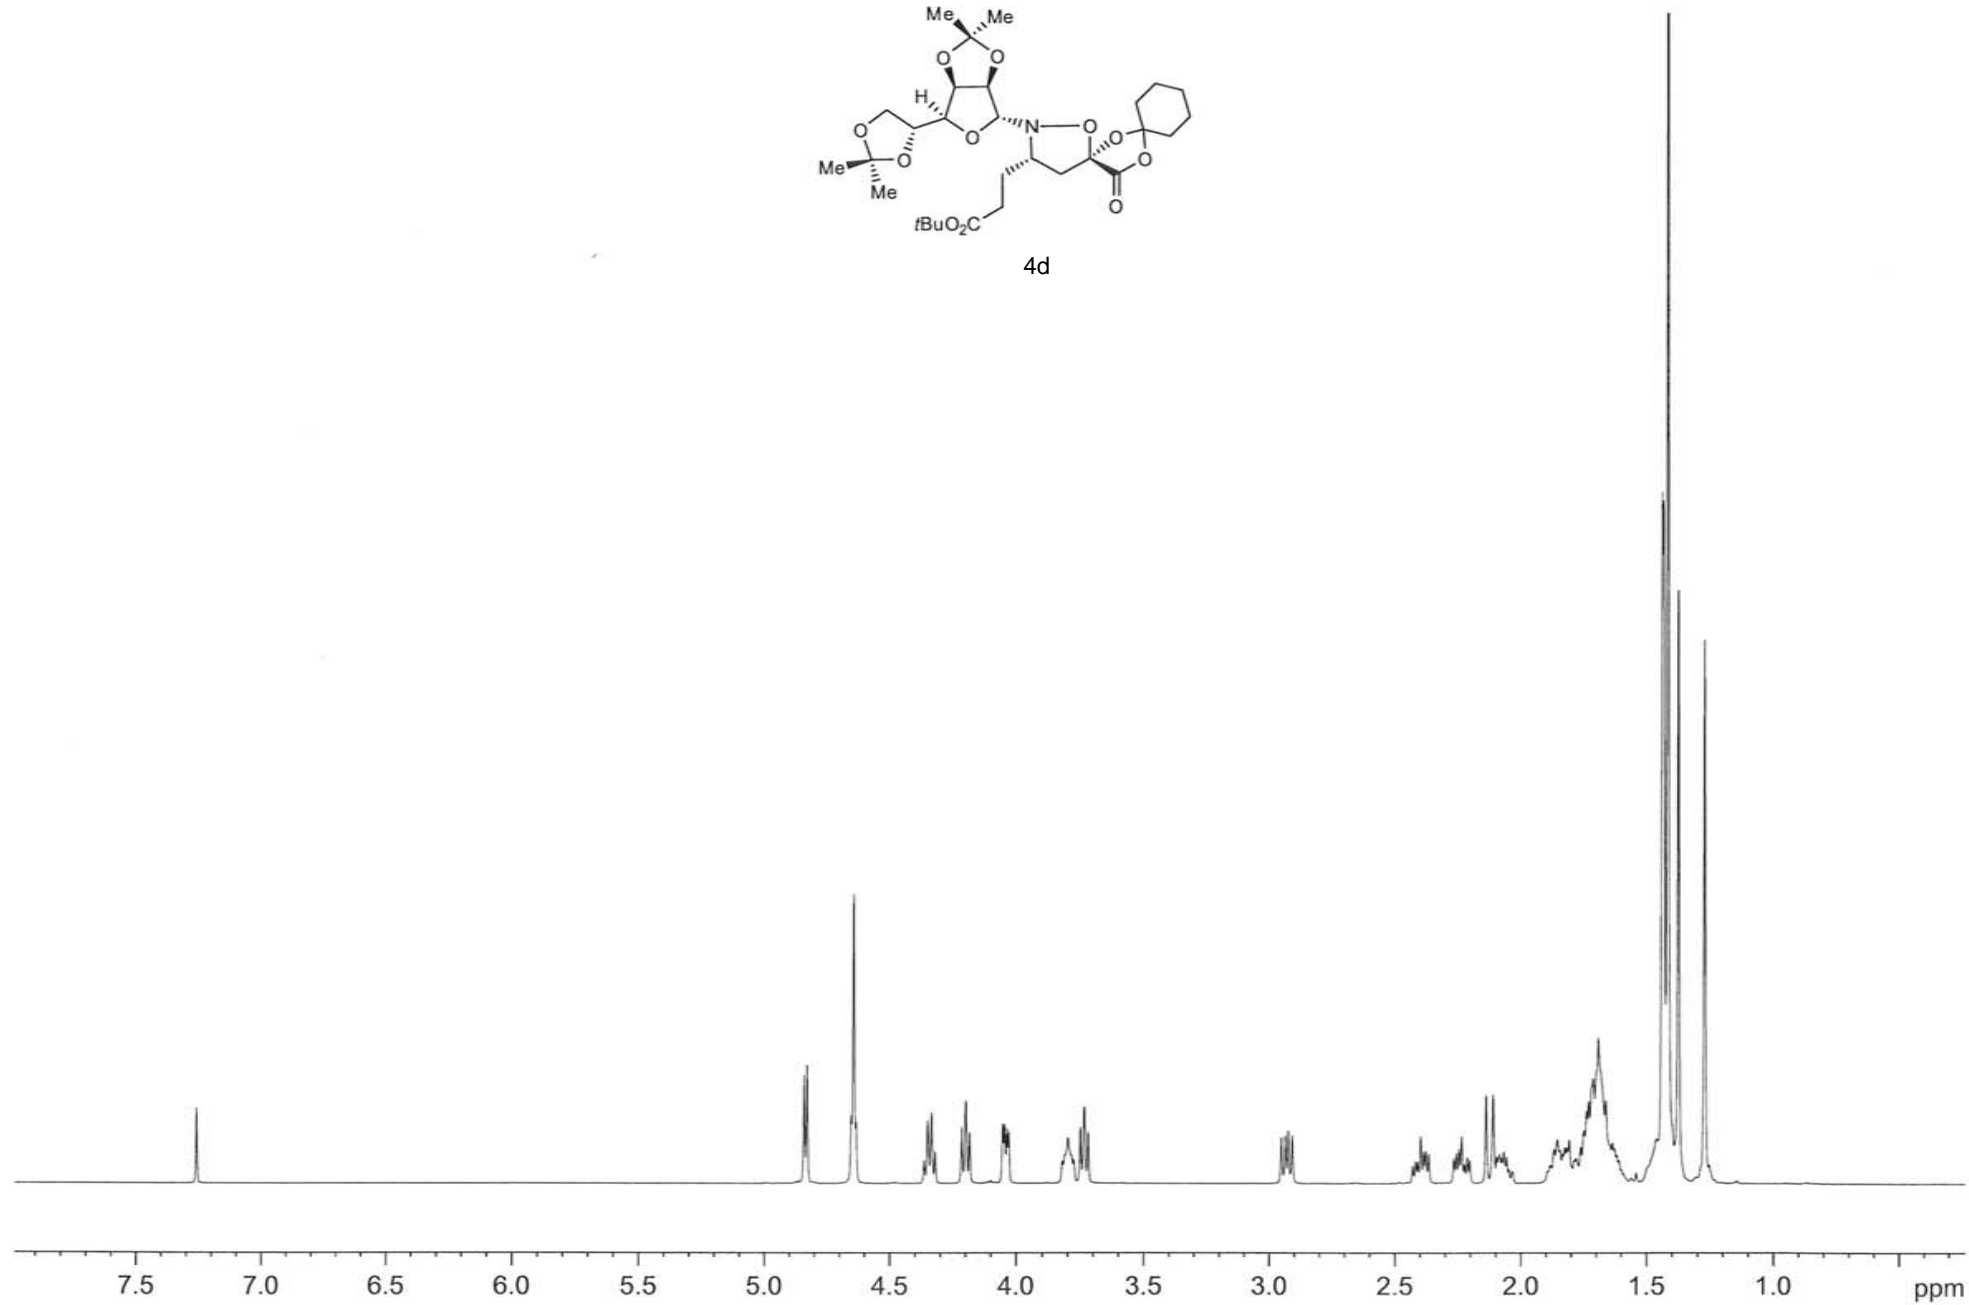

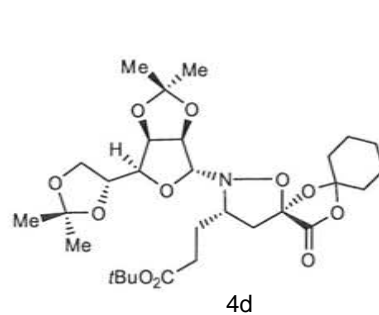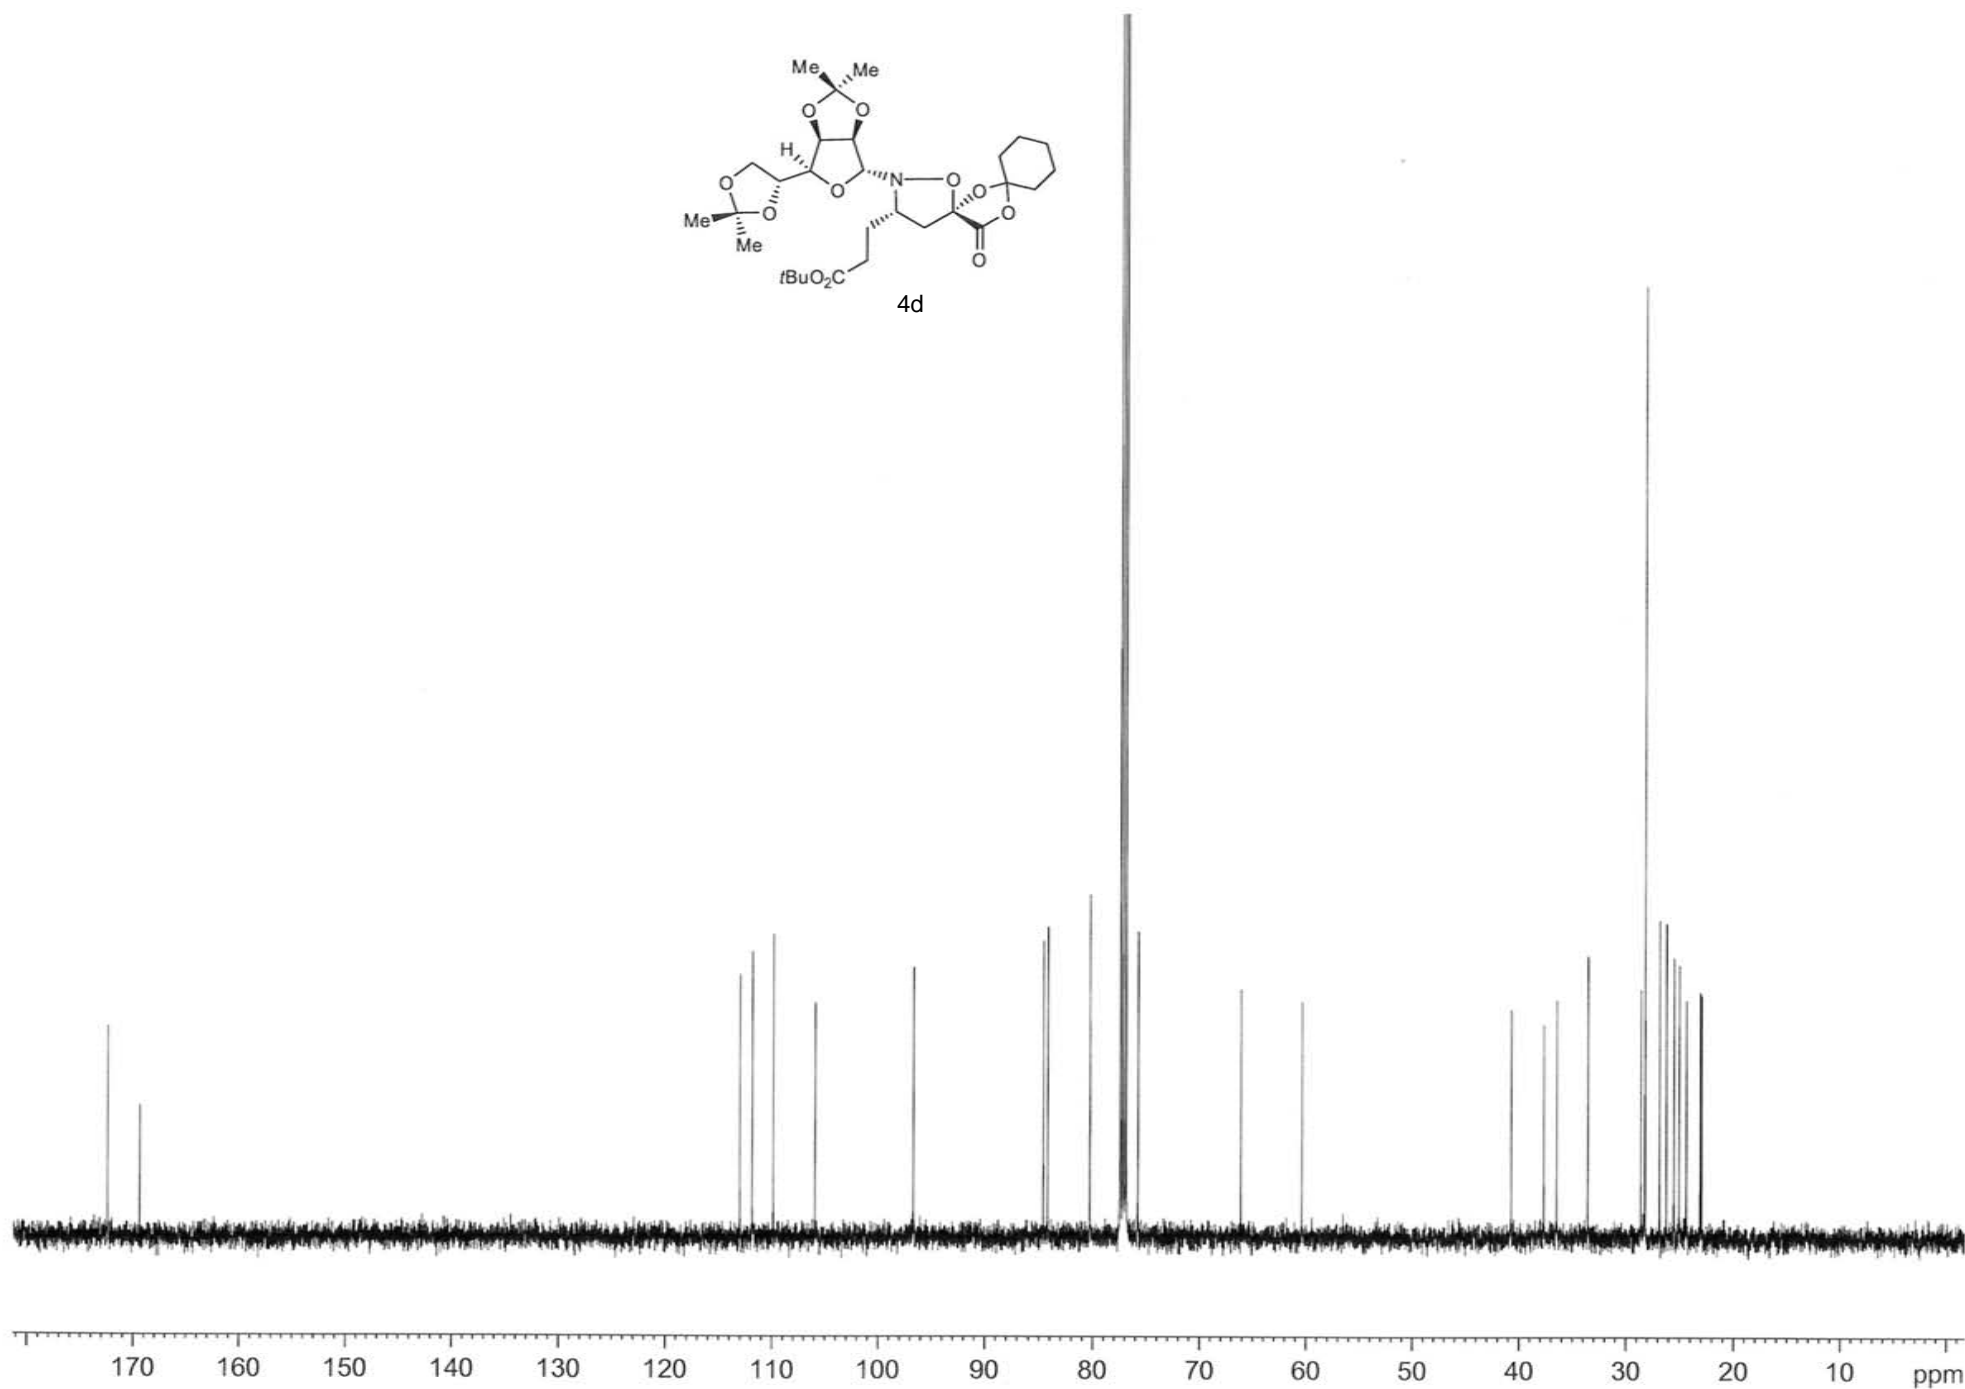



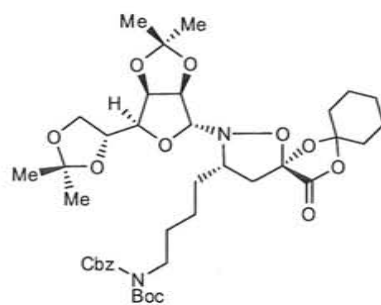

4e

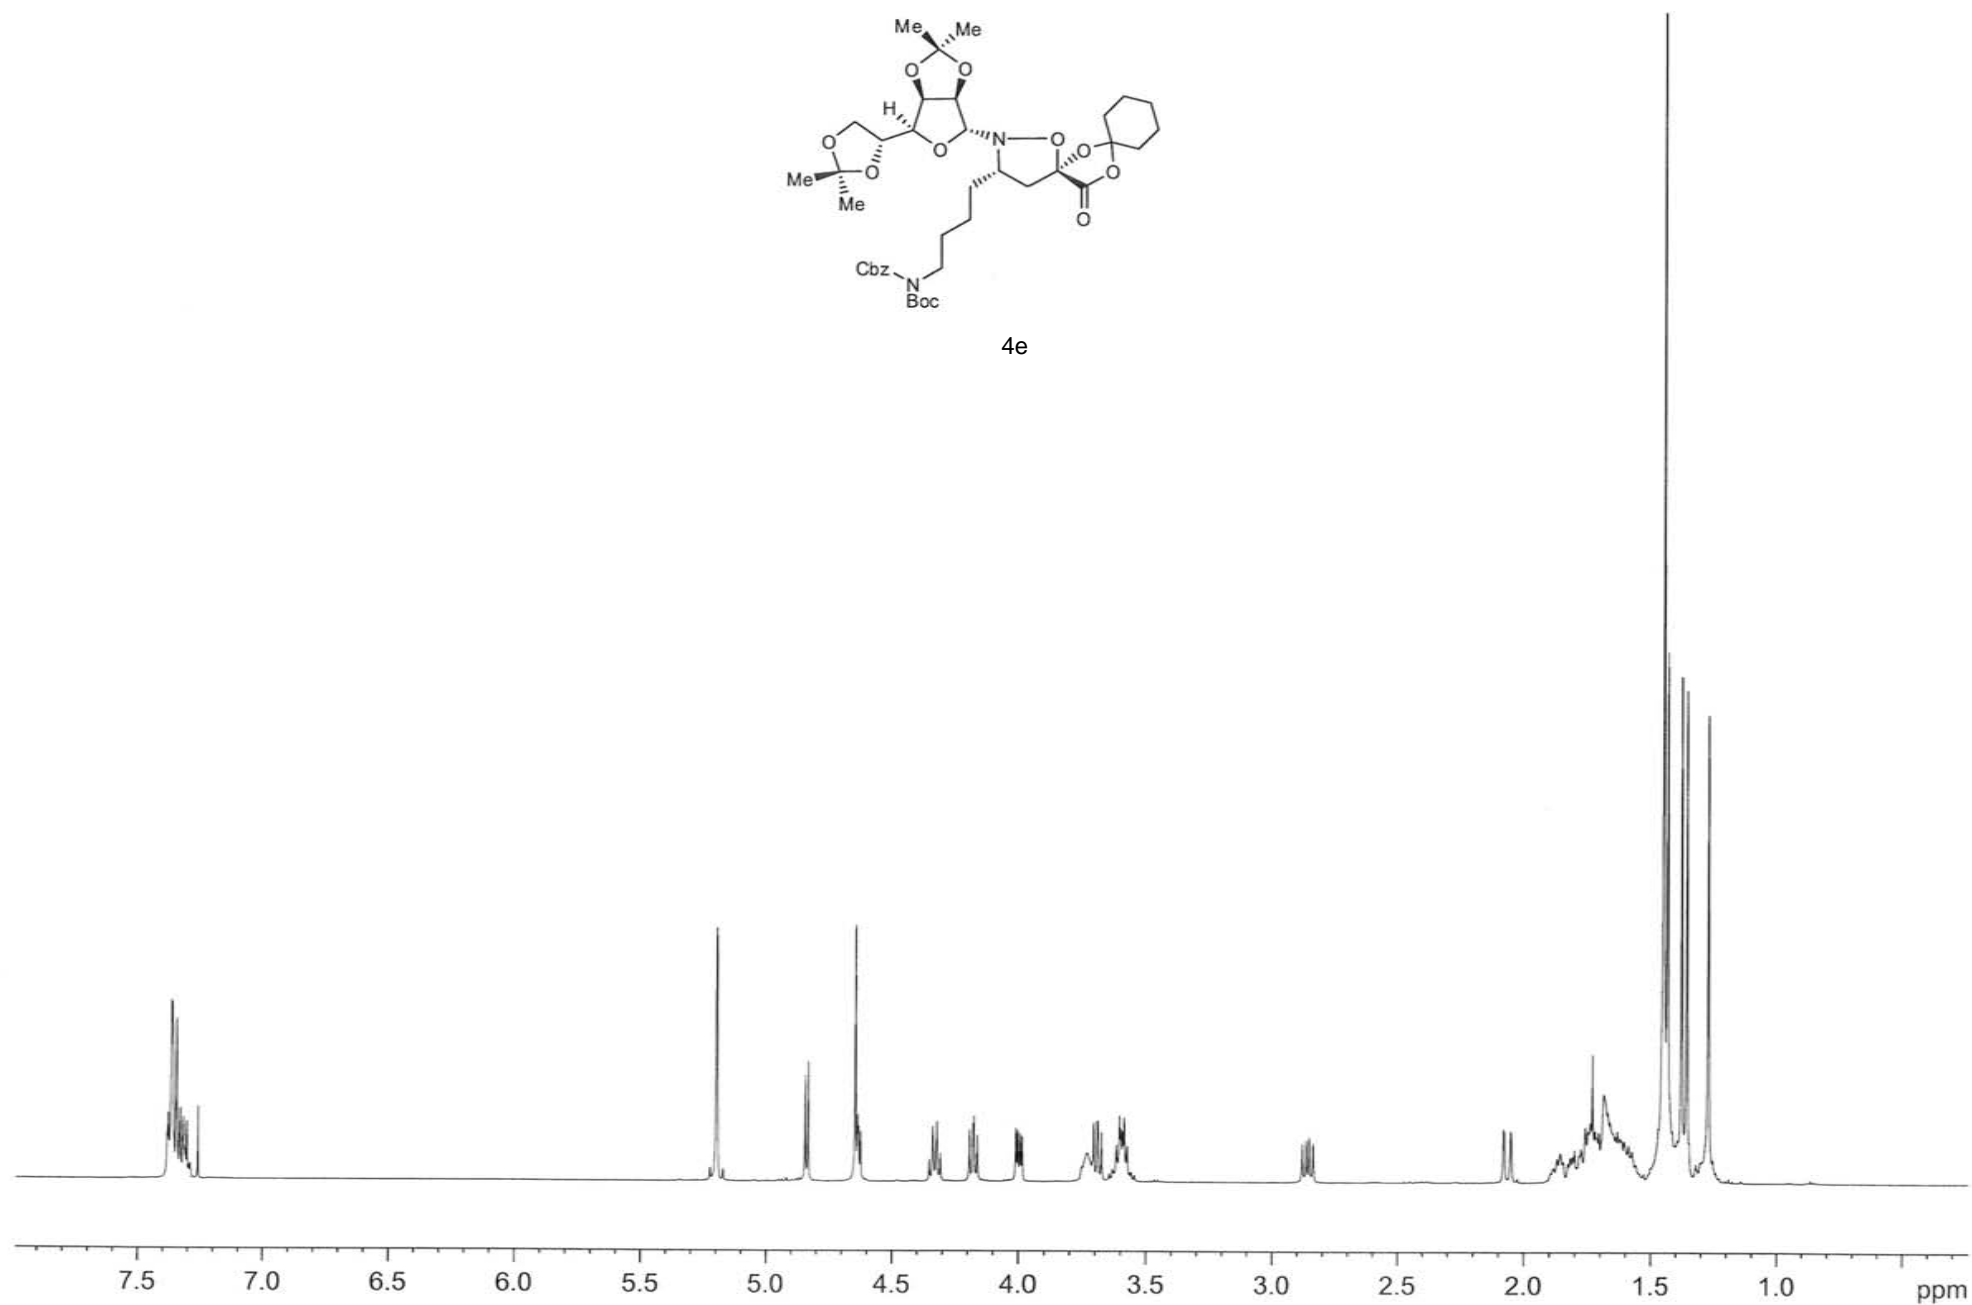

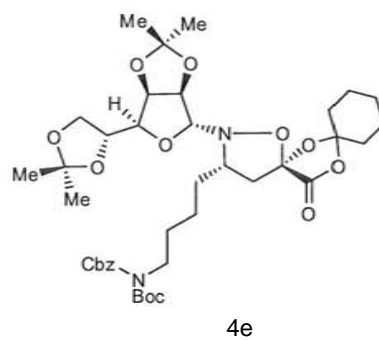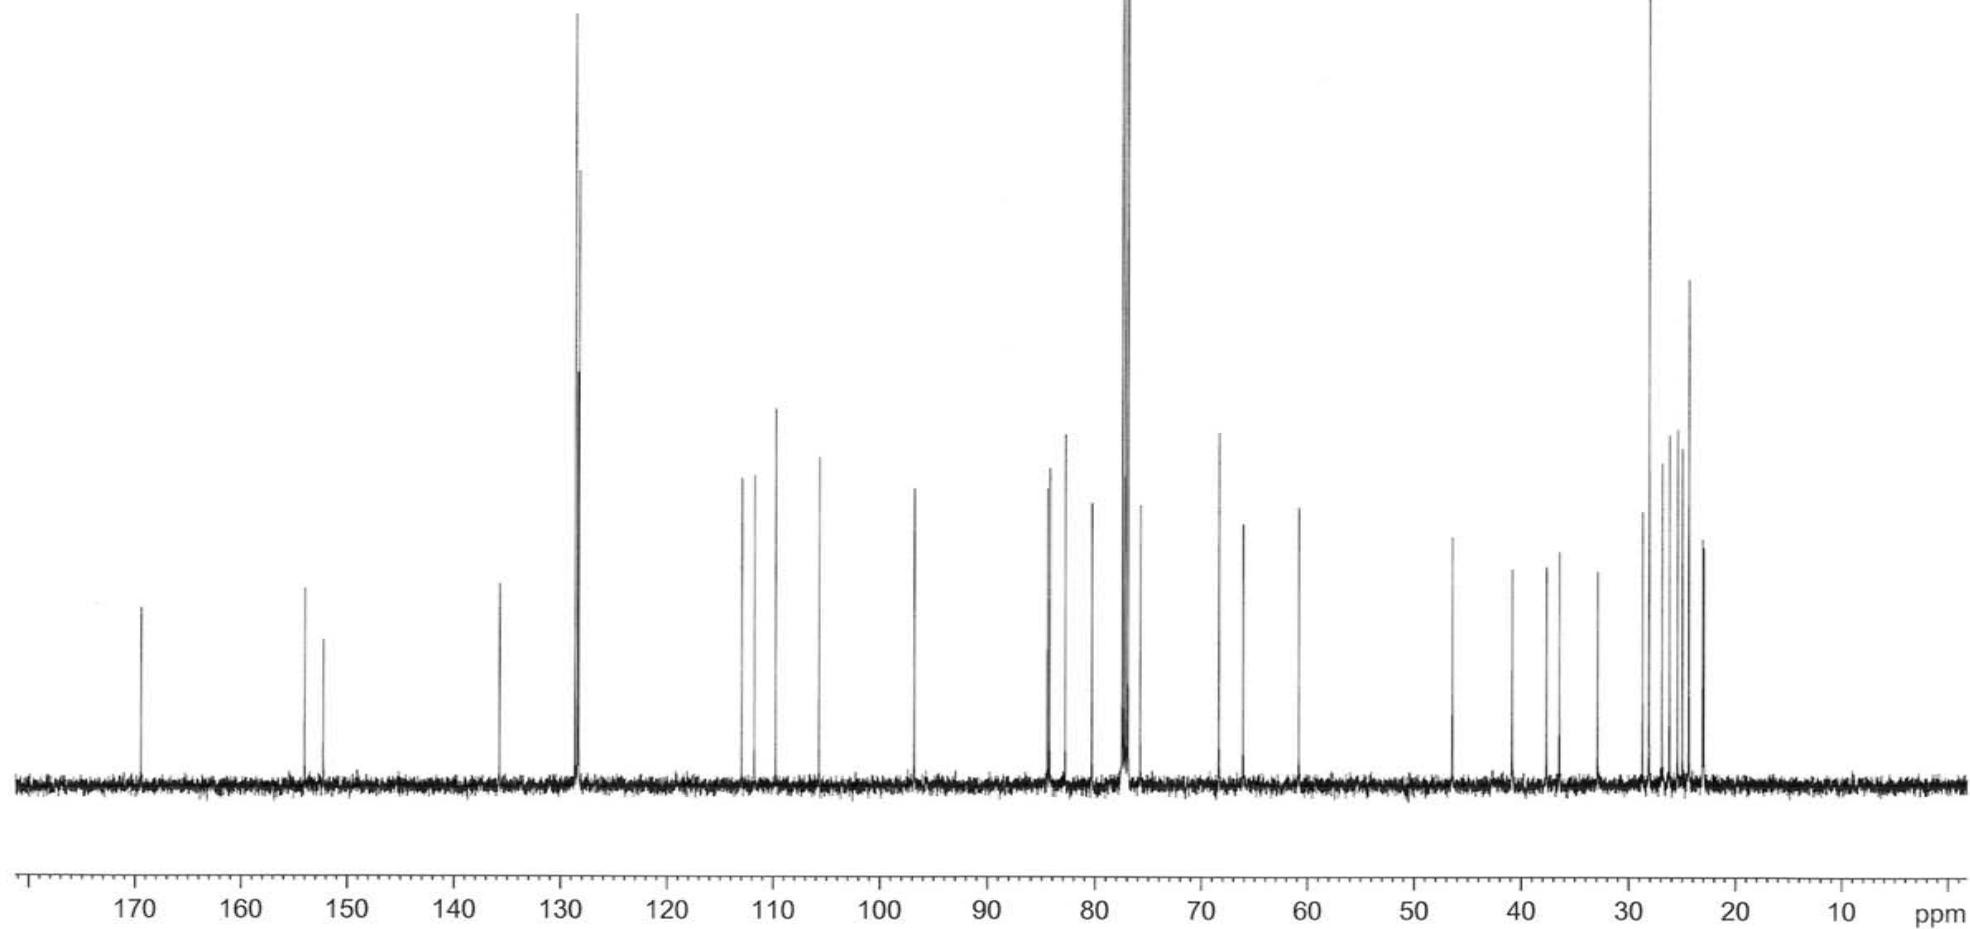

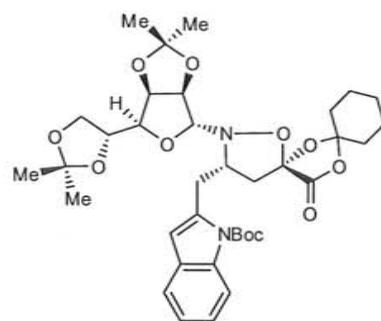

4f

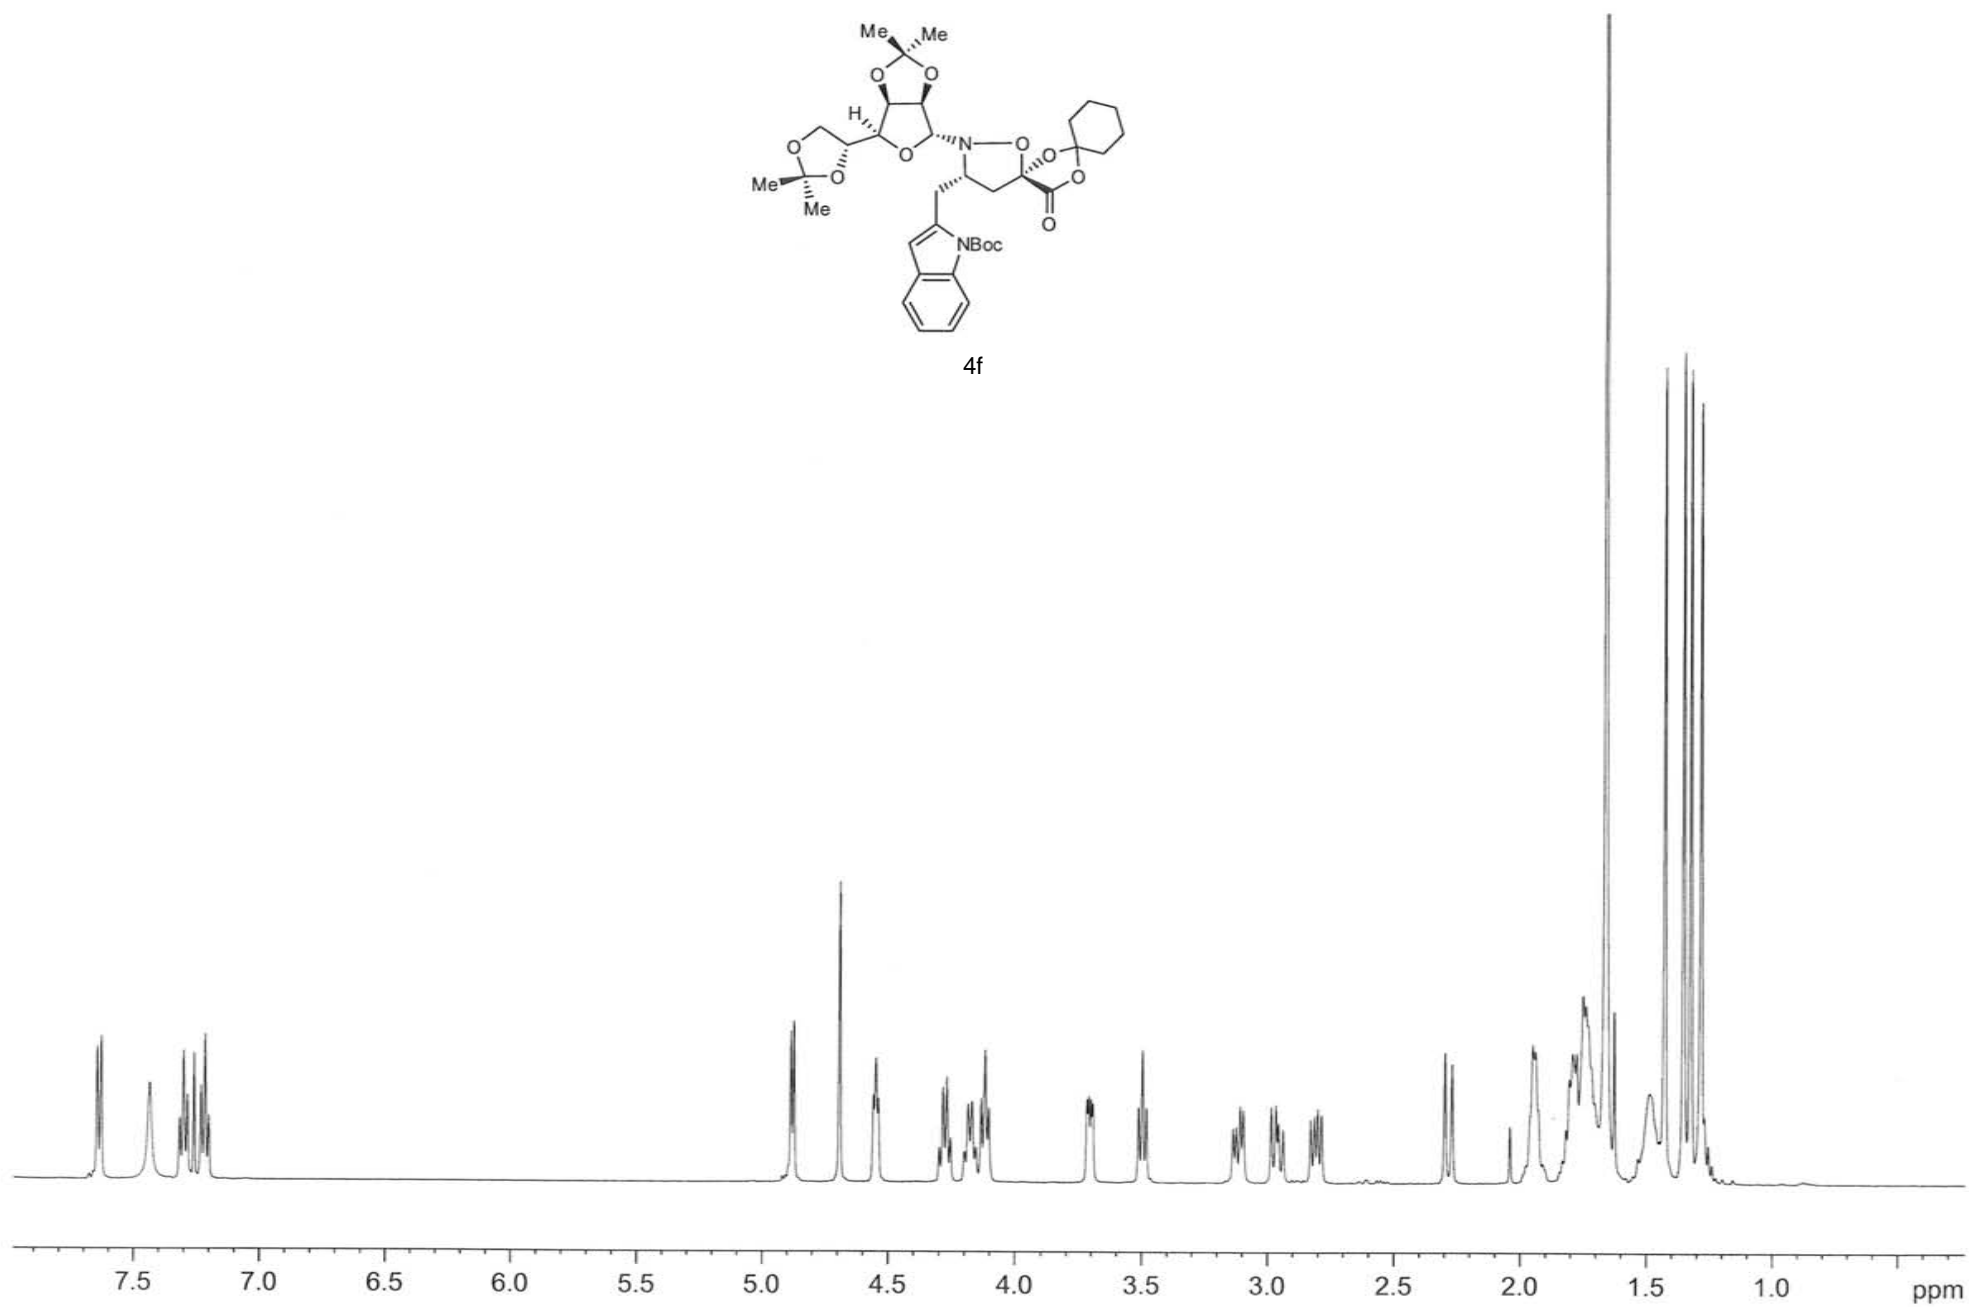

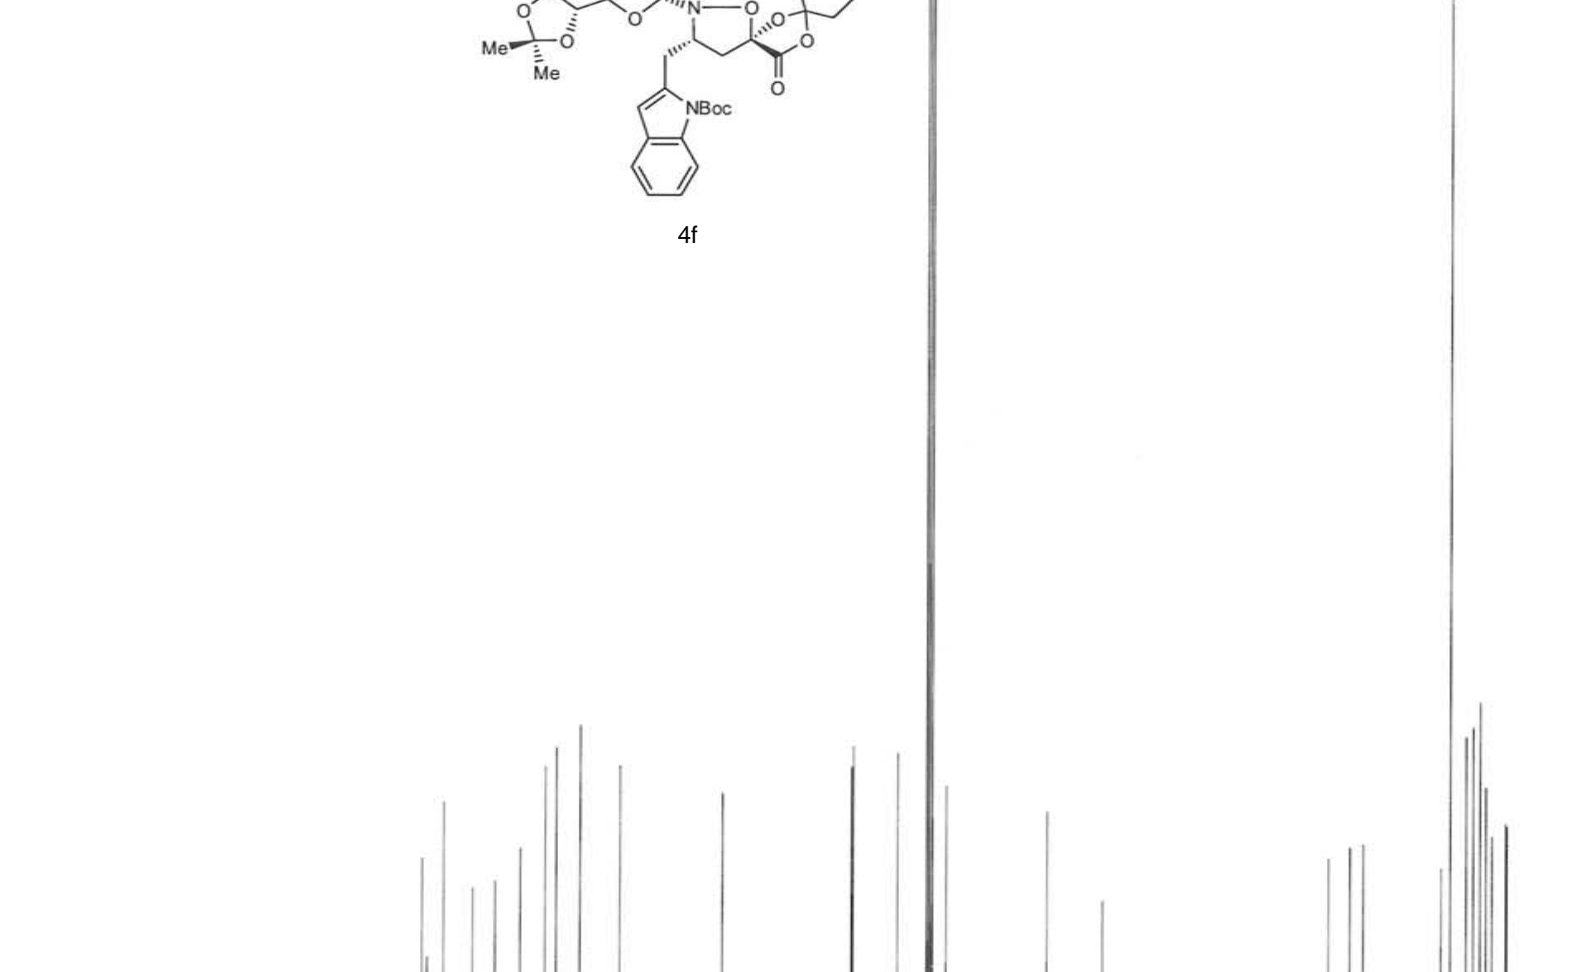
  
 The figure displays the chemical structure of compound **4f** and its corresponding <sup>1</sup>H NMR spectrum. The structure of **4f** is a complex molecule featuring a central bicyclic system (indole derivative) with a Boc-protected nitrogen. It is substituted with a 2,2-dimethyl-1,3-dioxolane ring, a 2,2-dimethyl-1,3-dioxane ring, and a 2,2,6,6-tetramethyl-1,3-dioxane-5-carboxylate group. The NMR spectrum shows a broad range of peaks from 0 to 10 ppm, with a prominent peak at approximately 7.5 ppm and a large cluster of peaks between 2.0 and 4.0 ppm.

**4f**

170 160 150 140 130 120 110 100 90 80 70 60 50 40 30 20 10 ppm

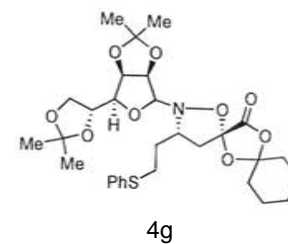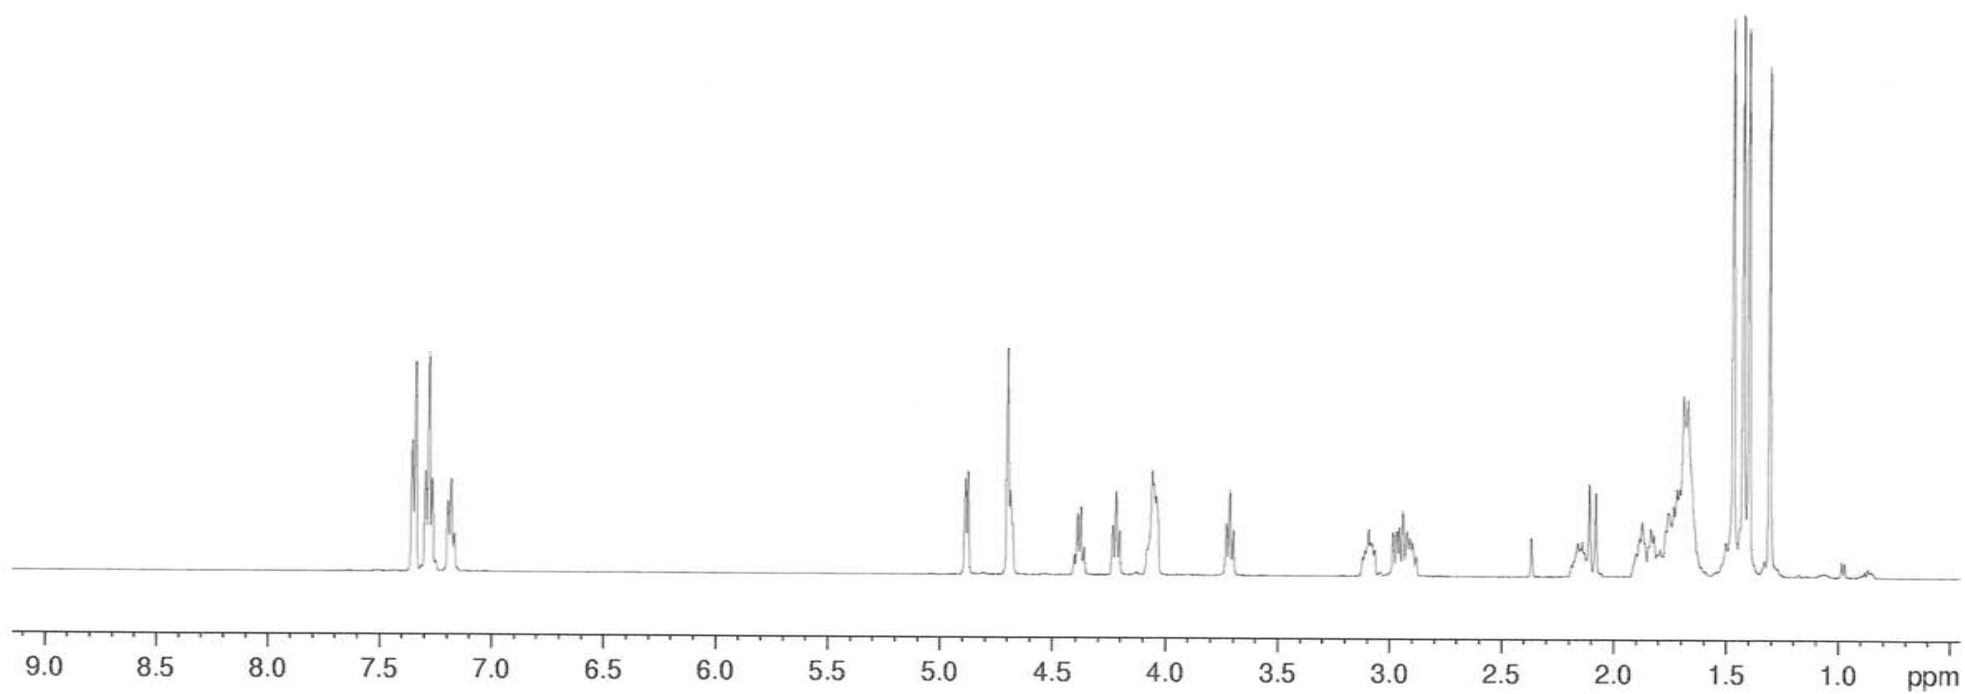

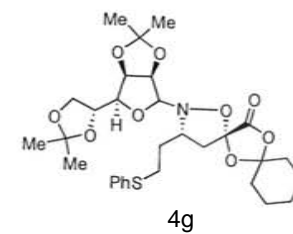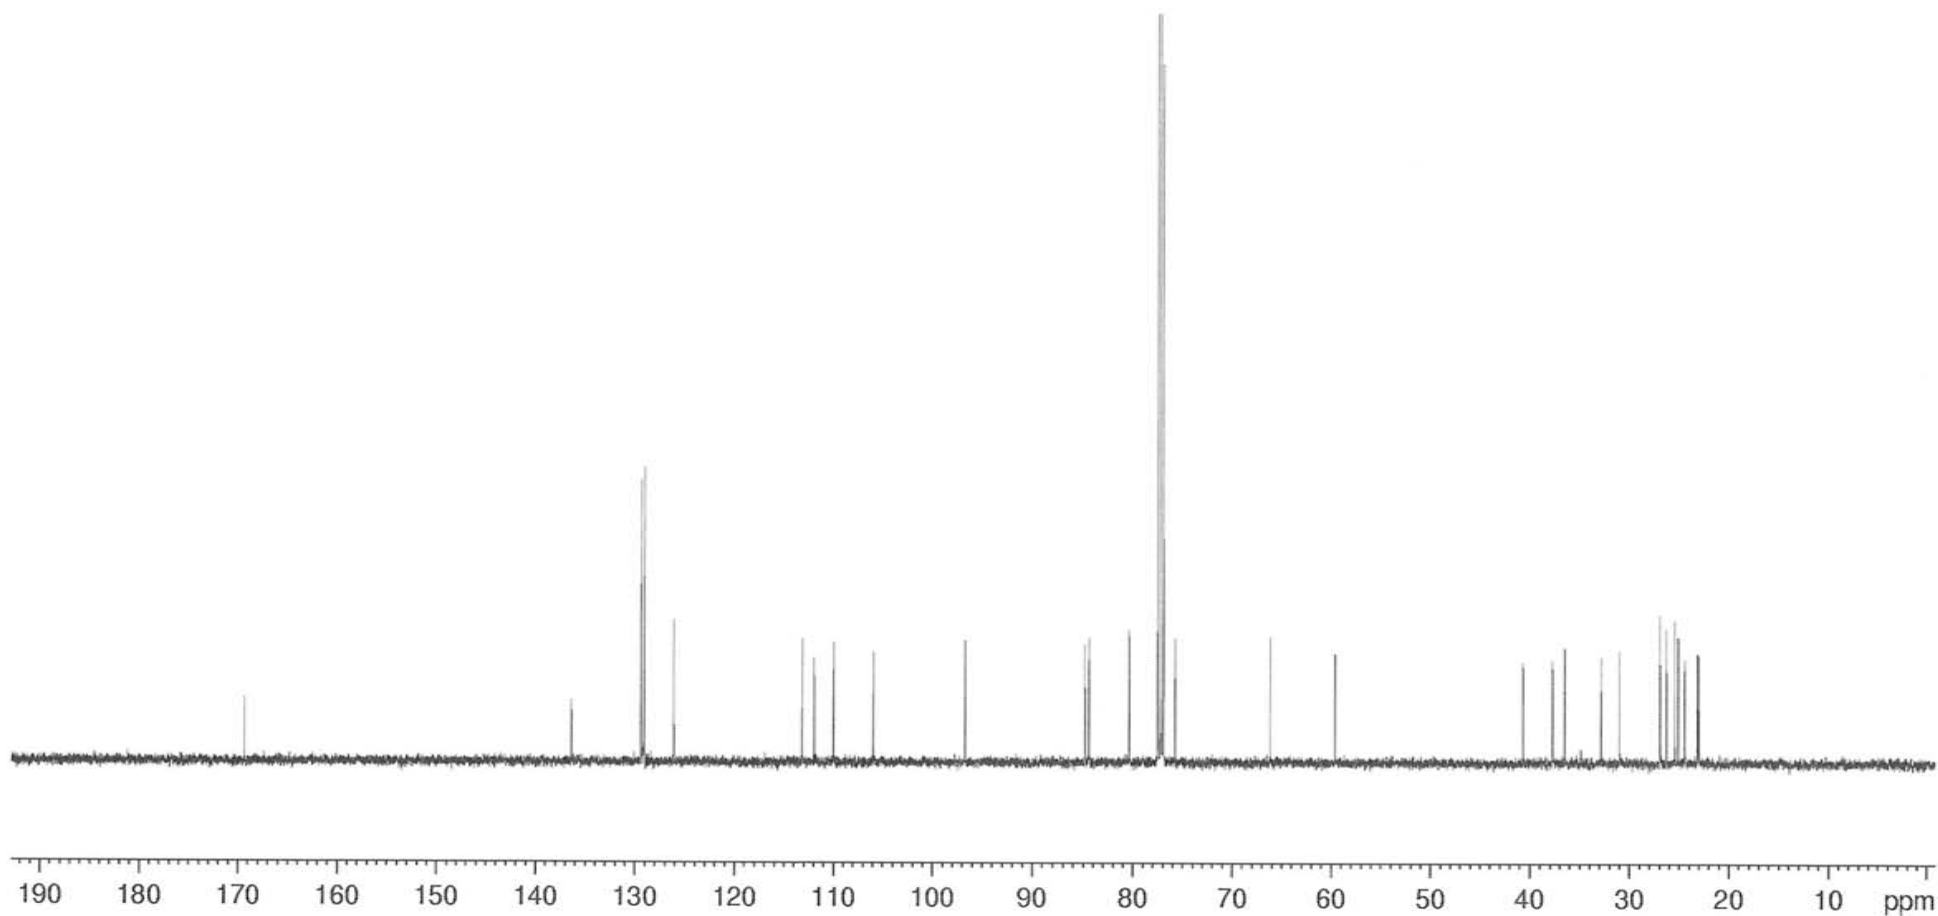

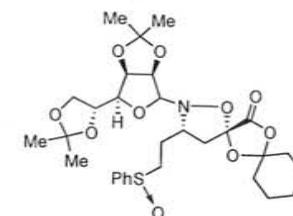

4h

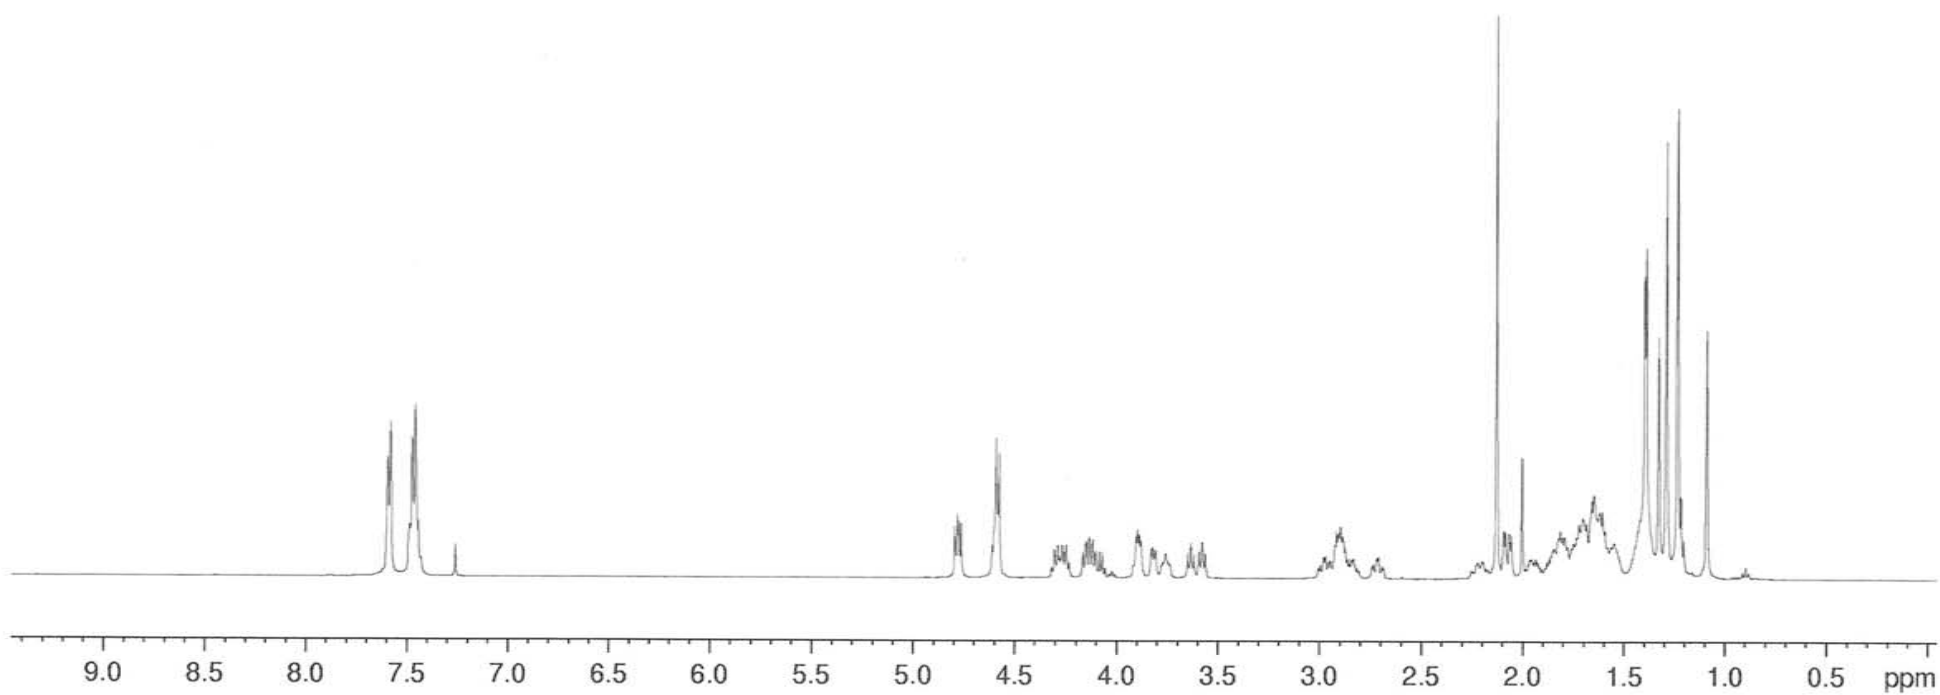

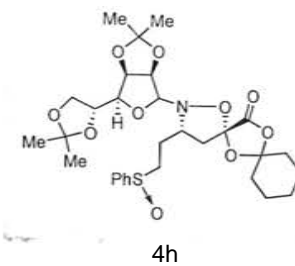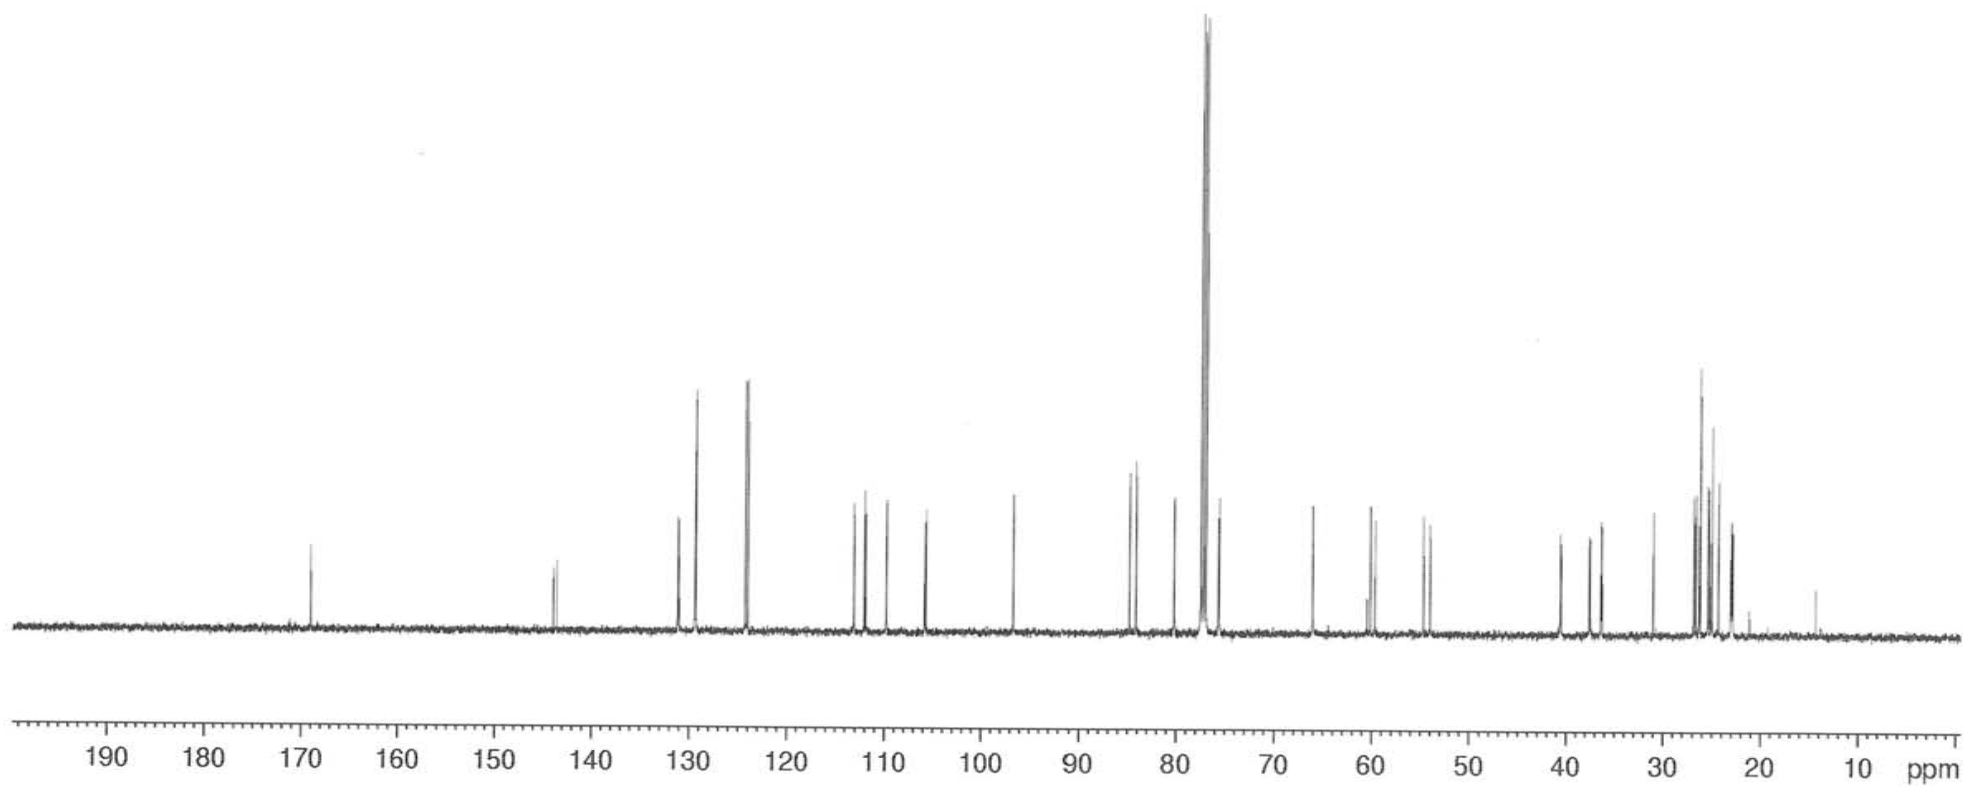



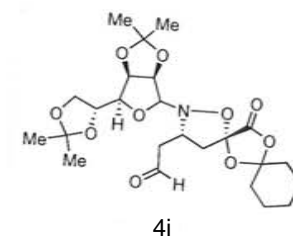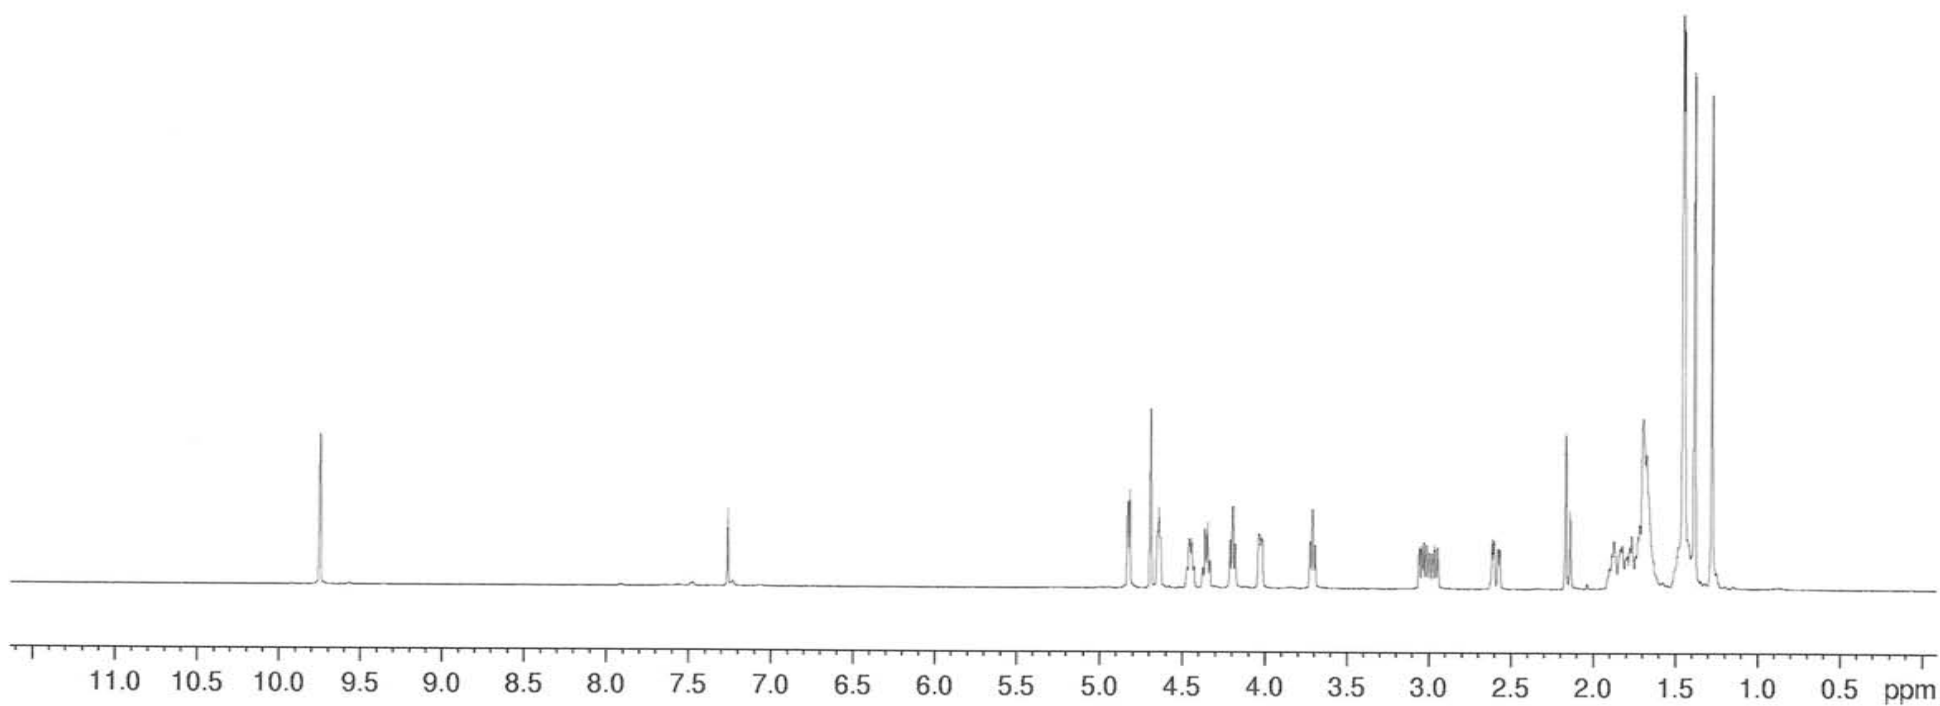

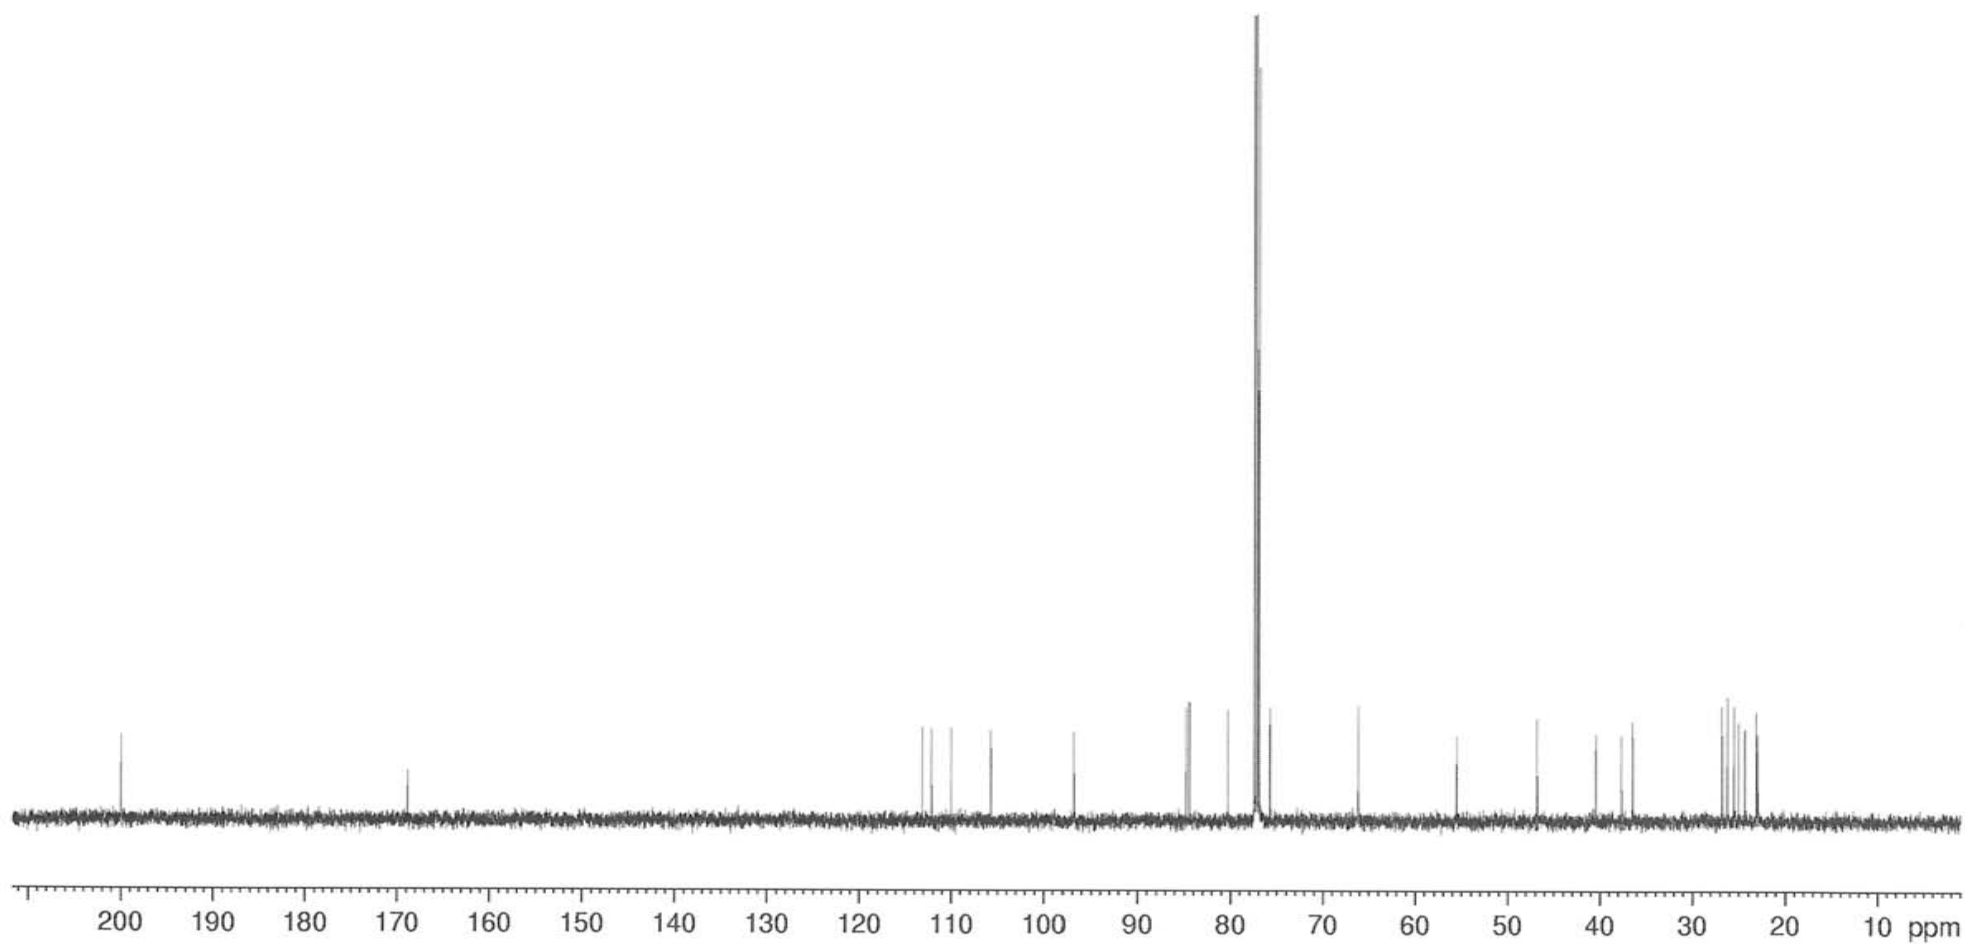

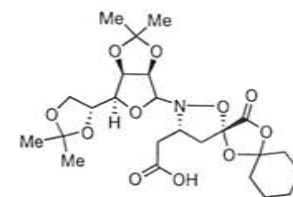

4j

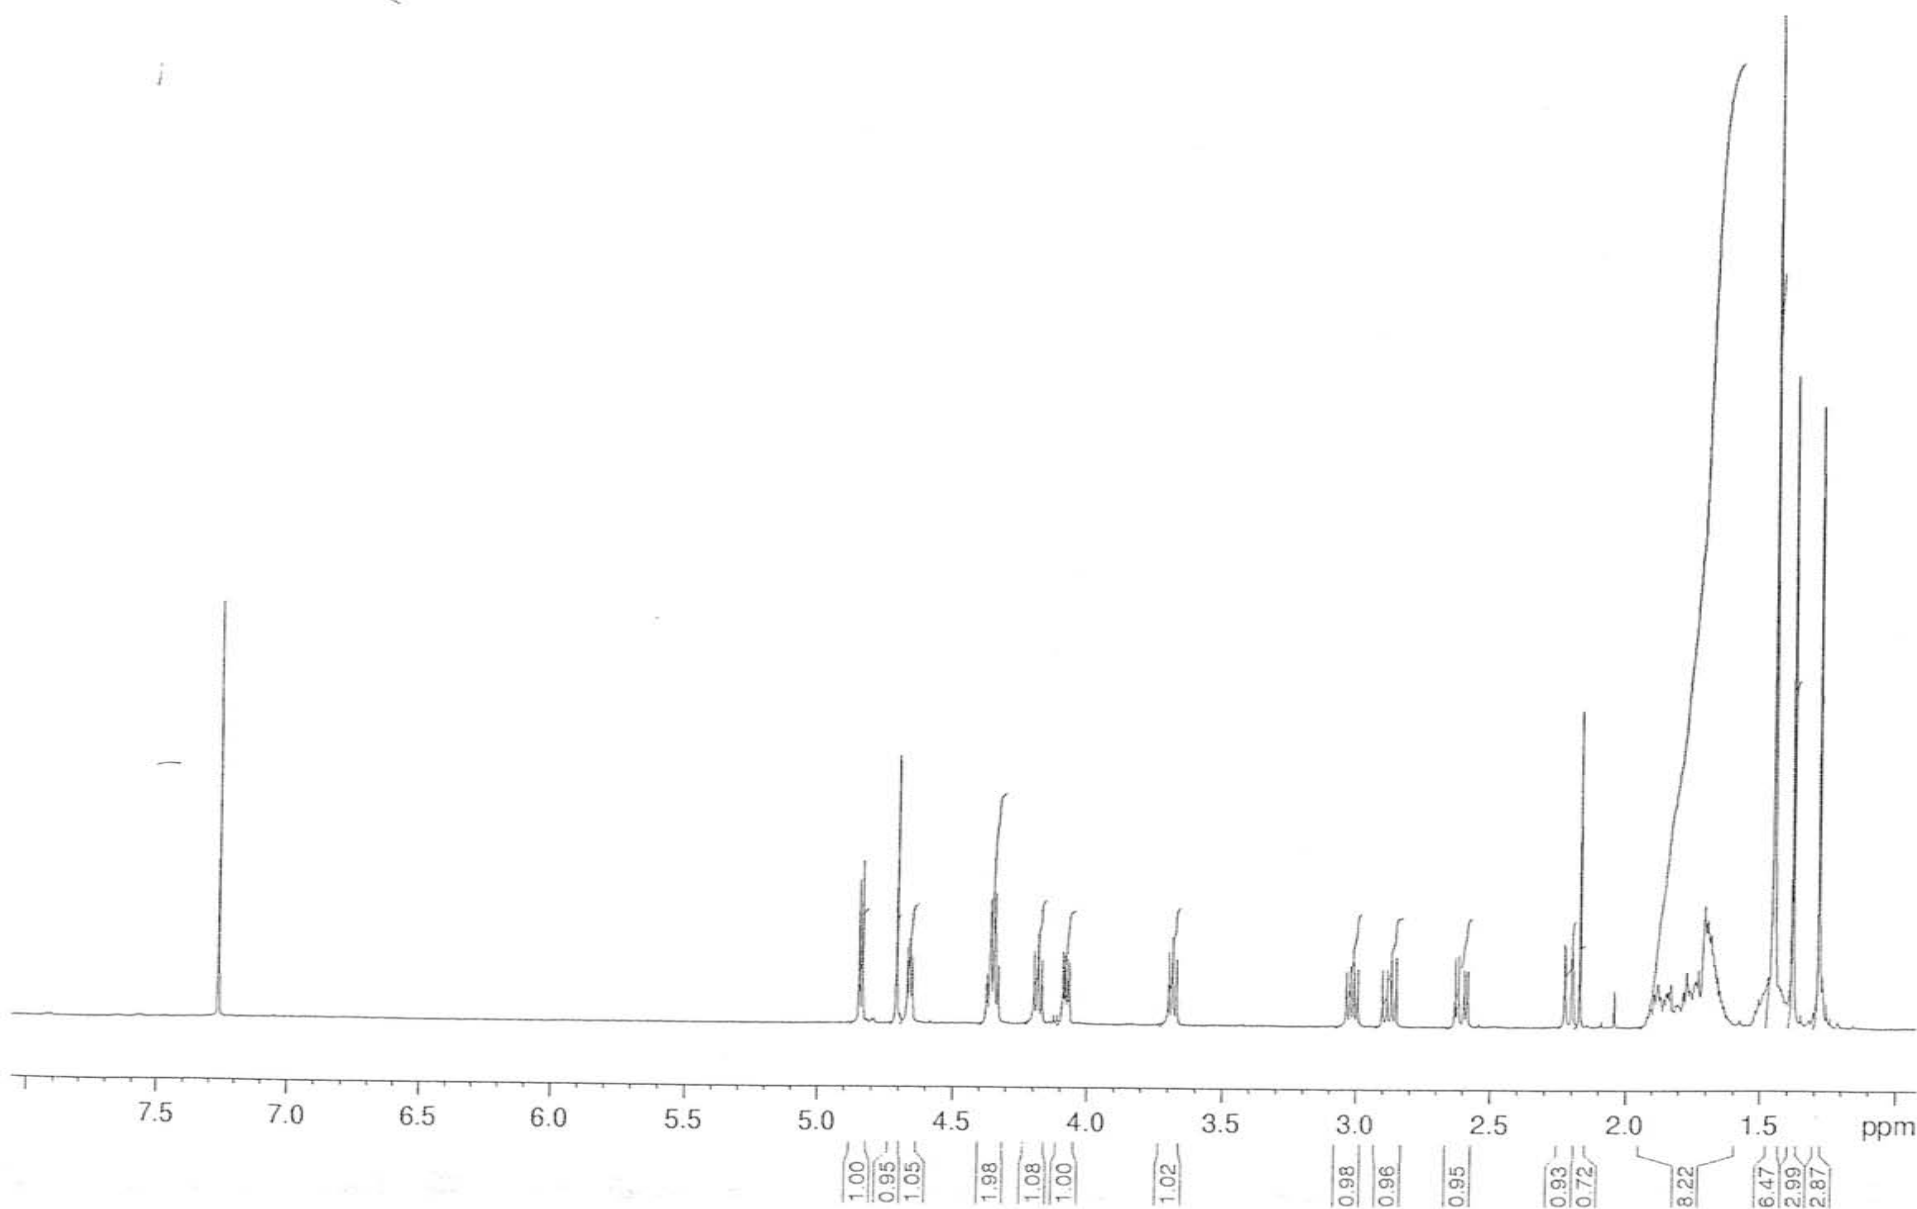

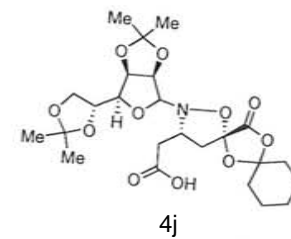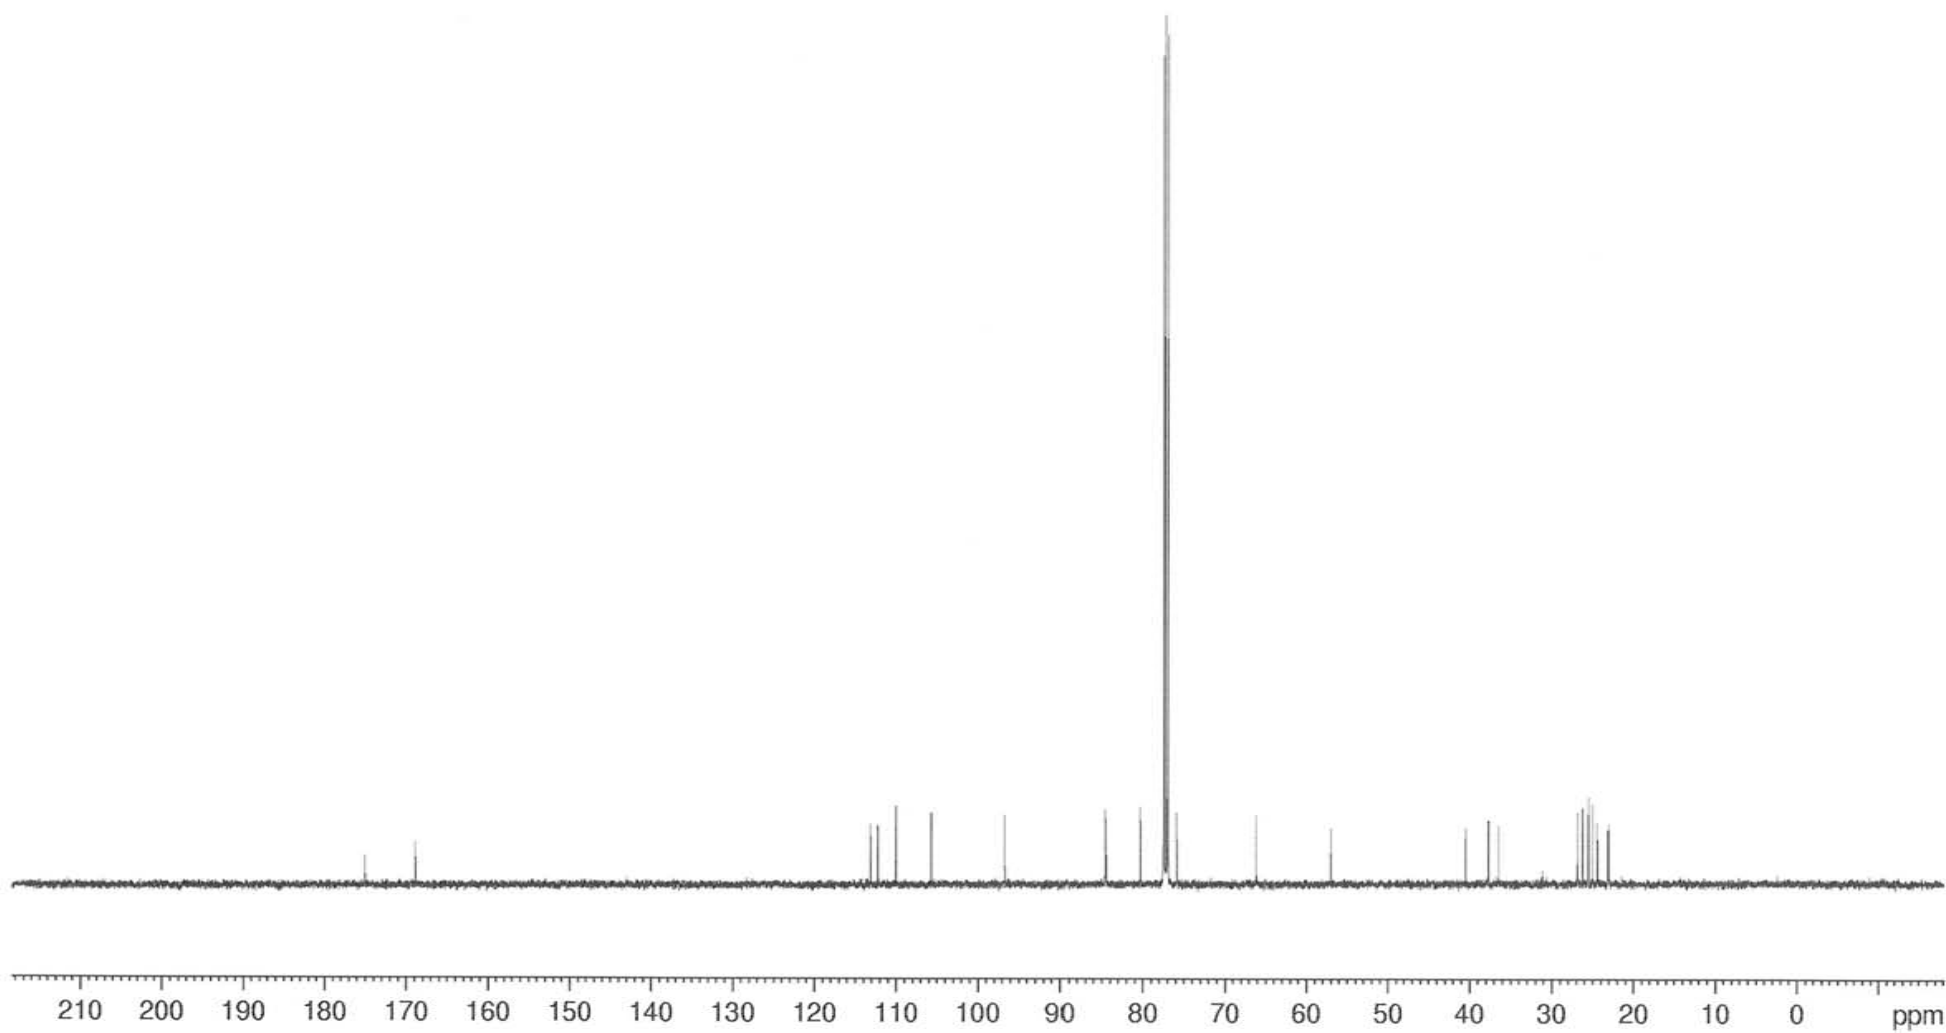

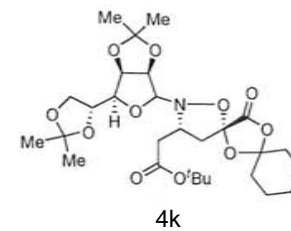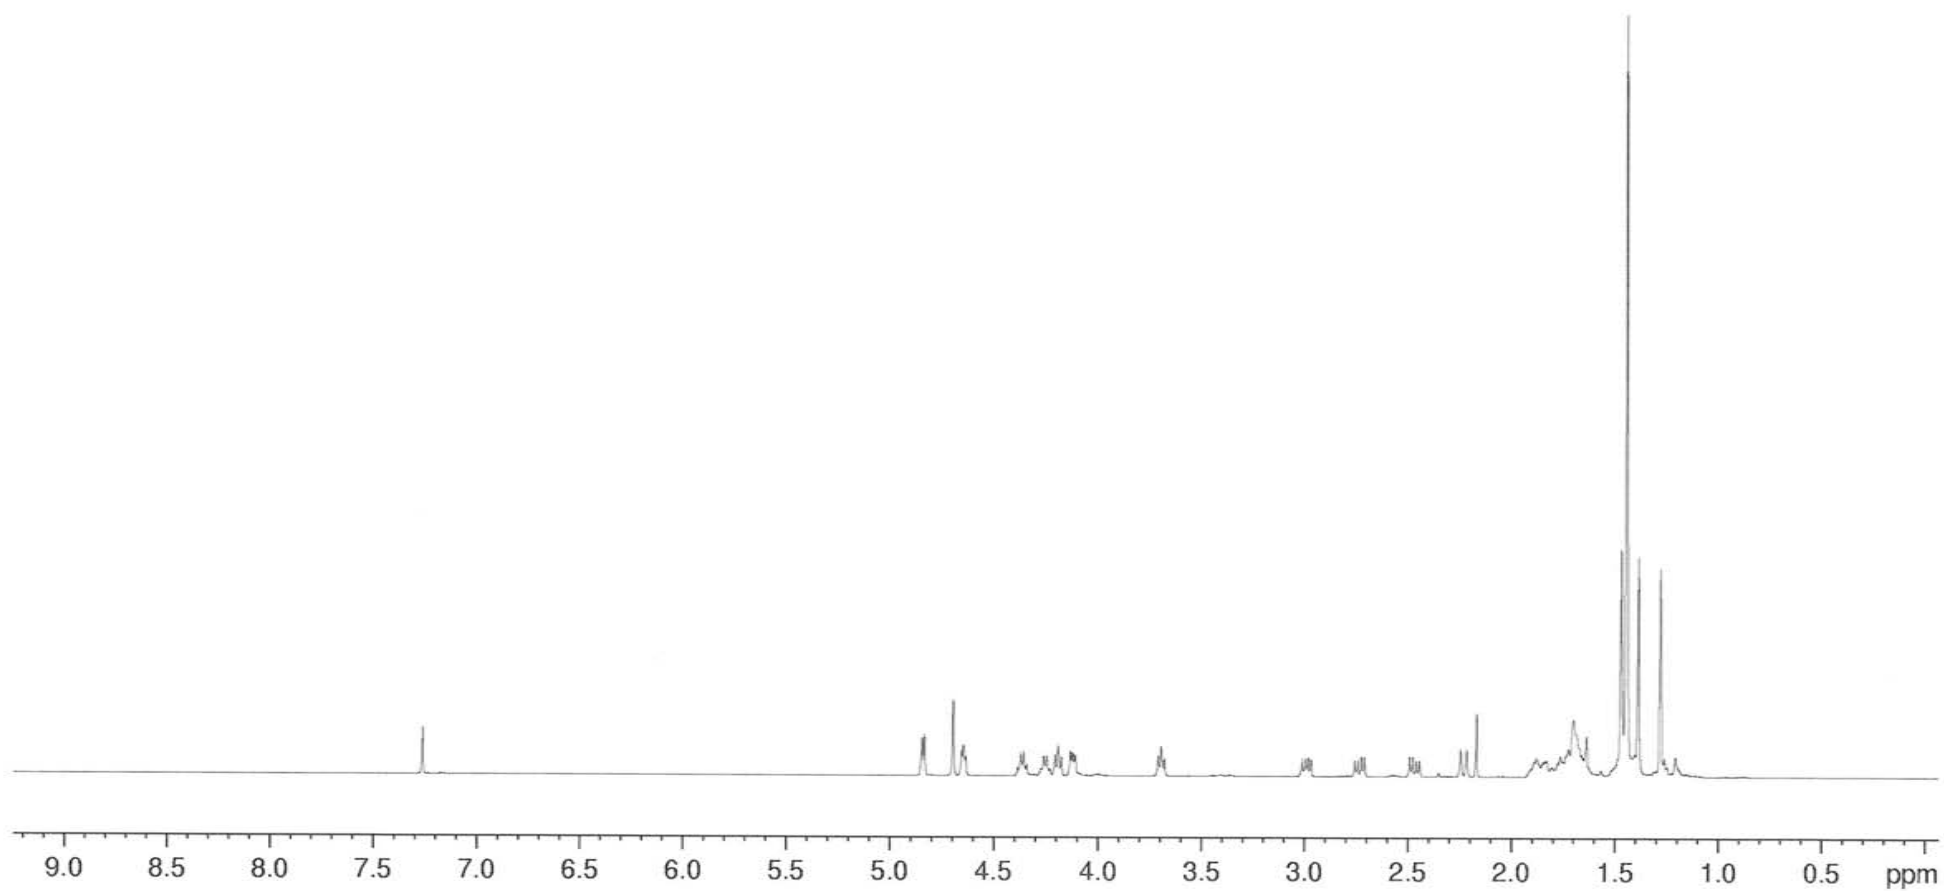

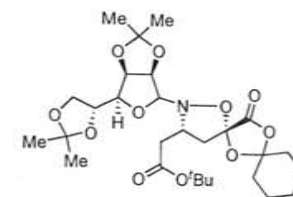

4k

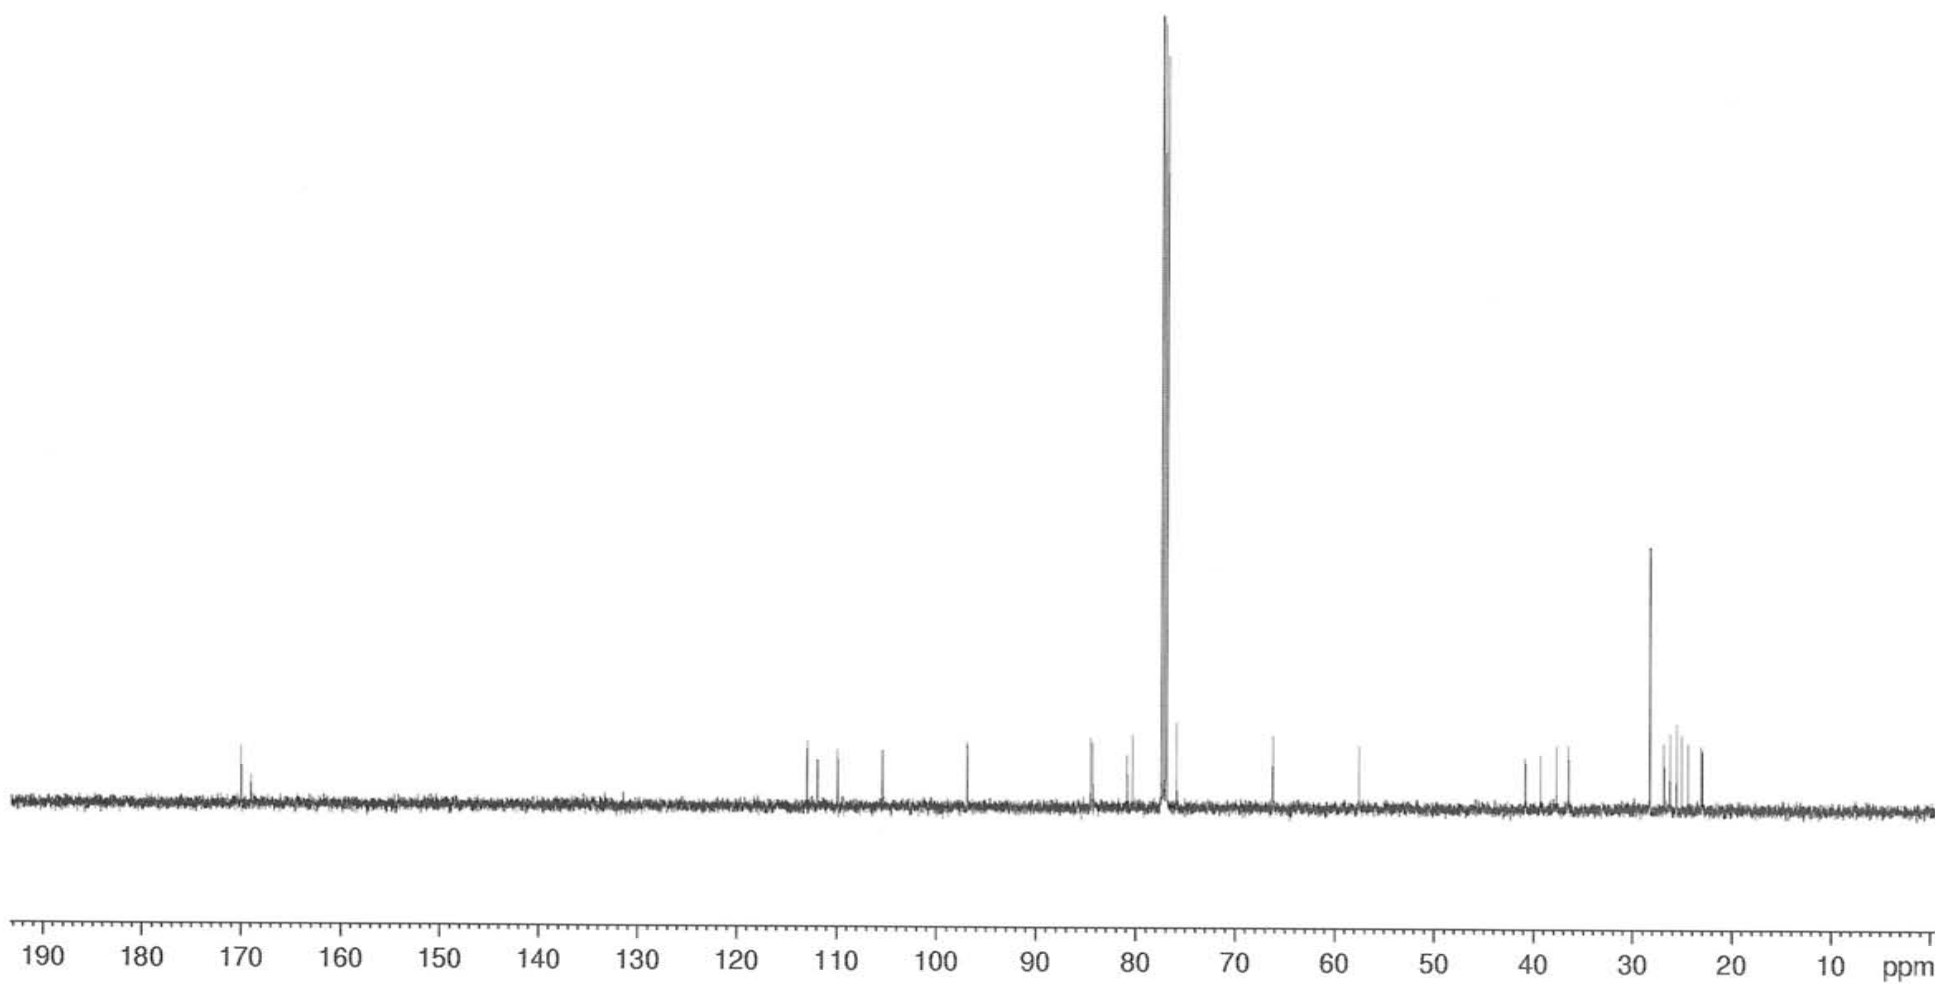

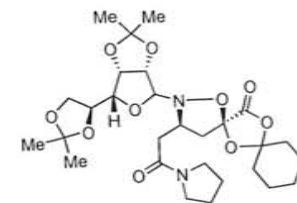

4l

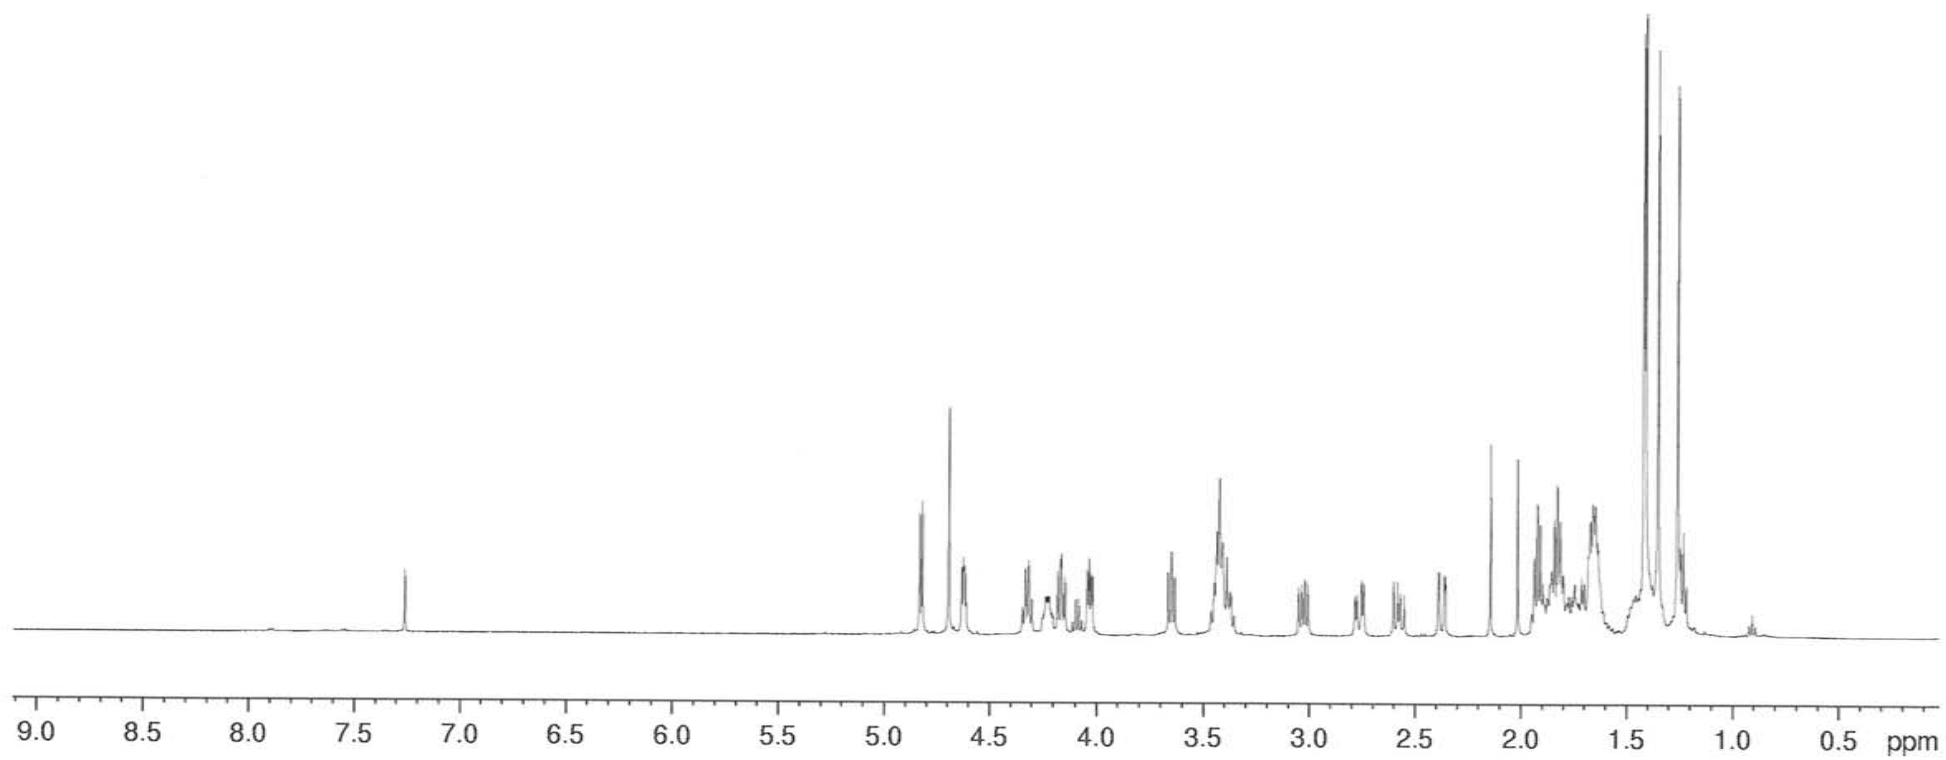

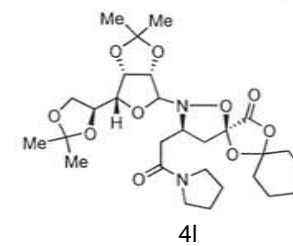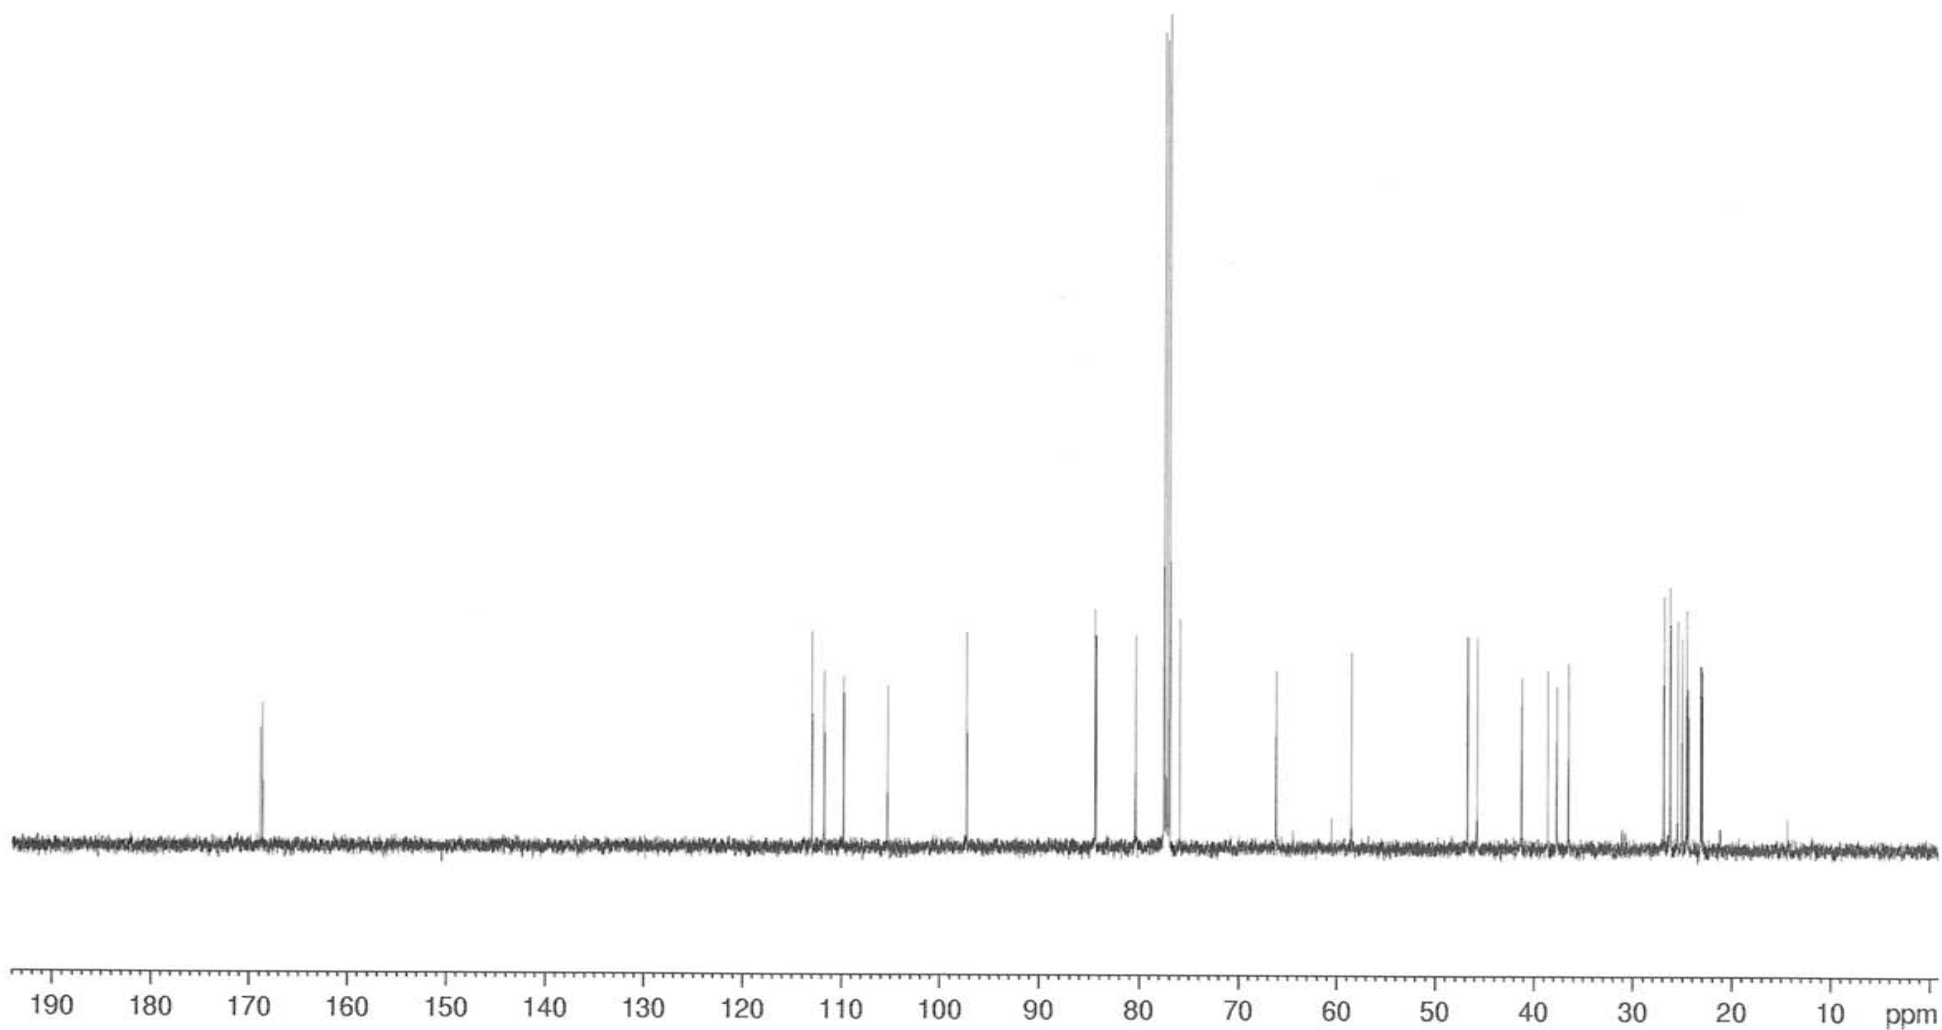



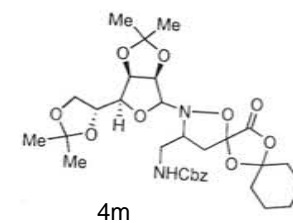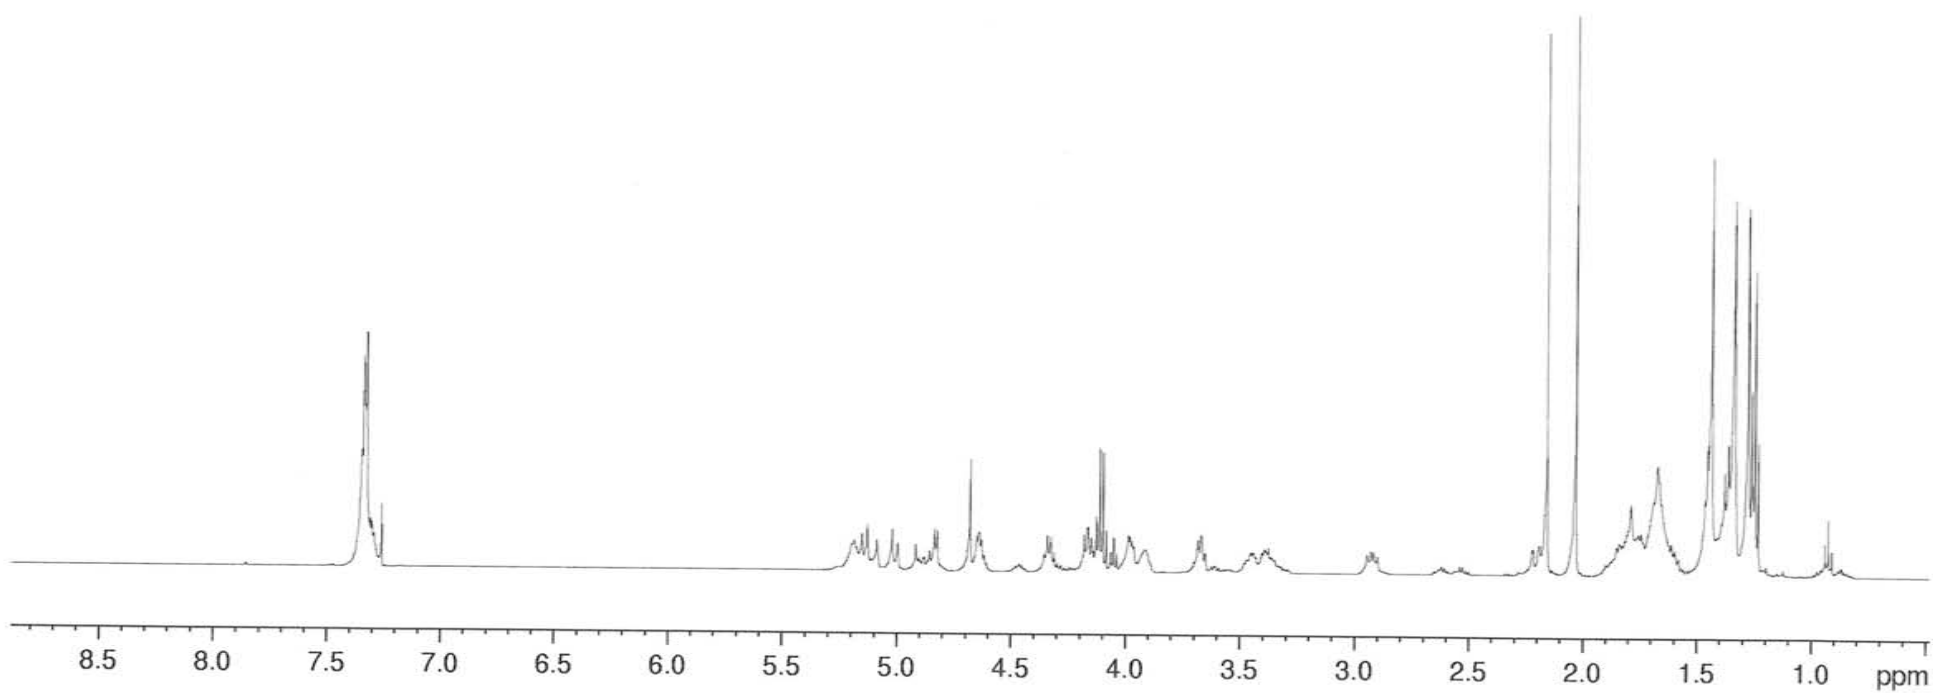

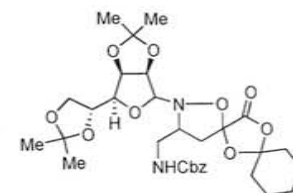

4m

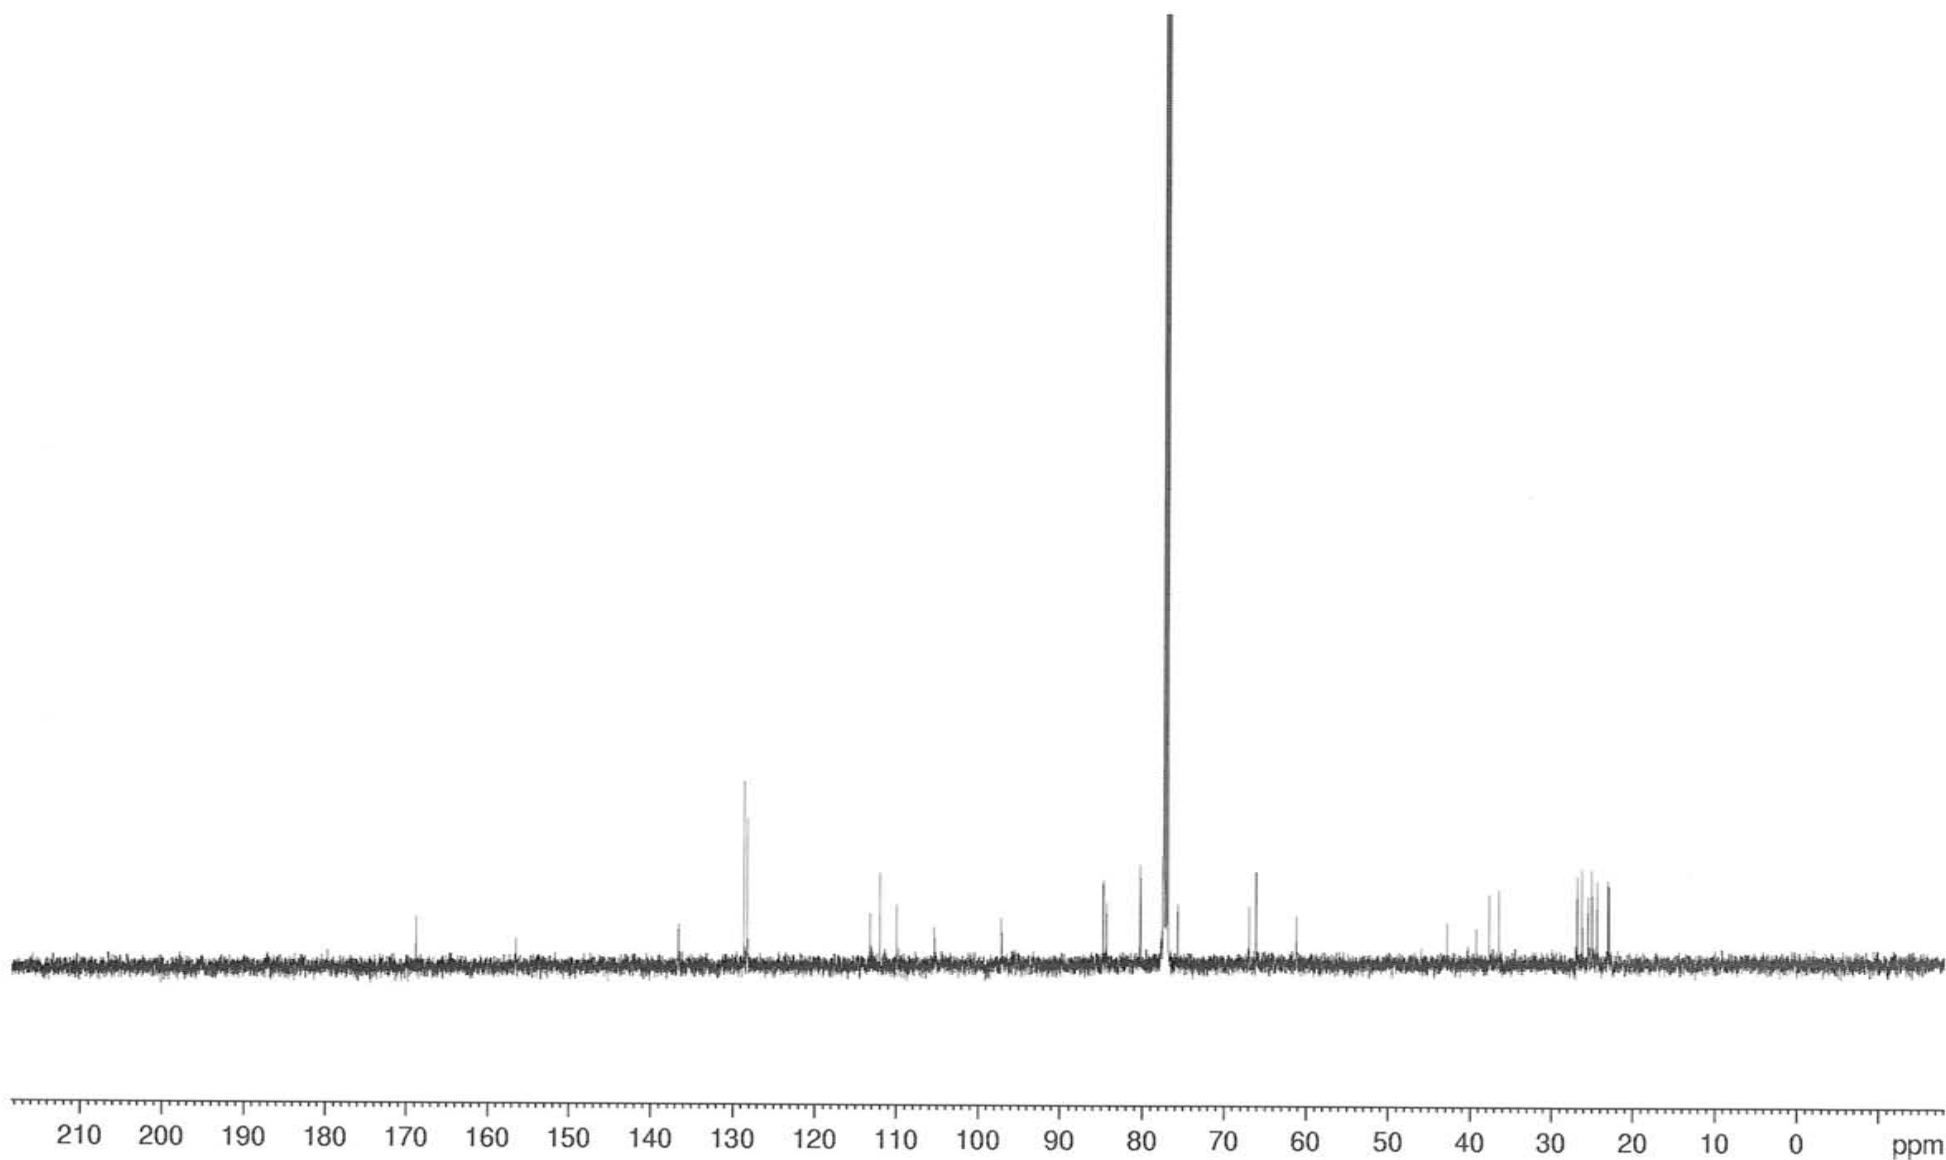

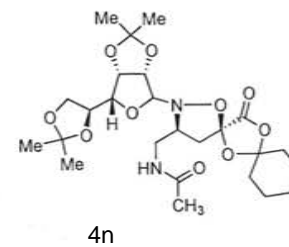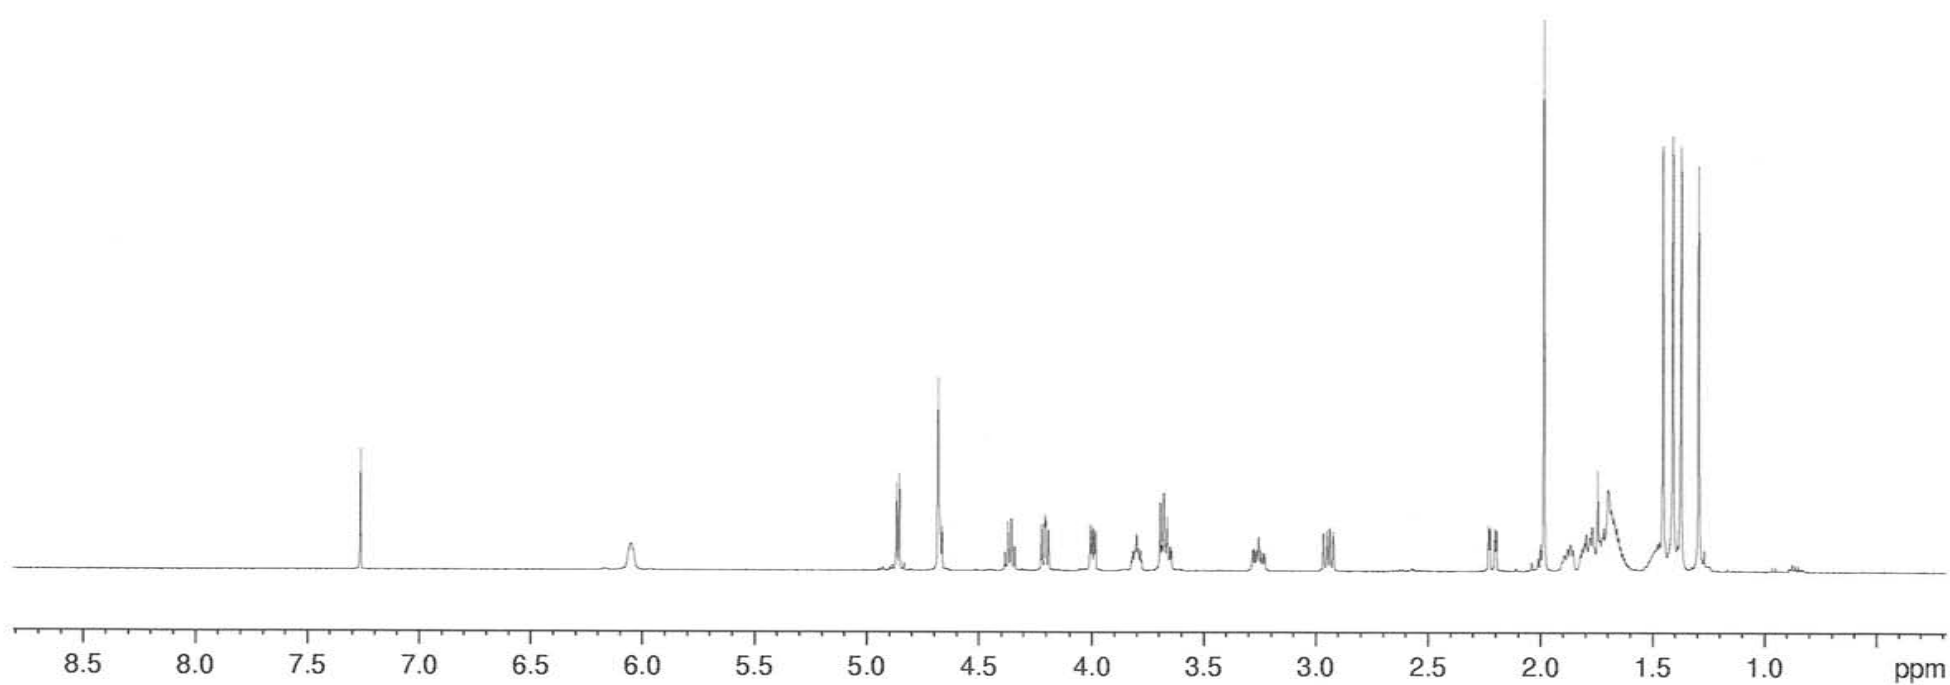

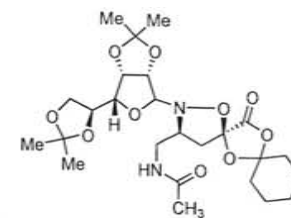

4n

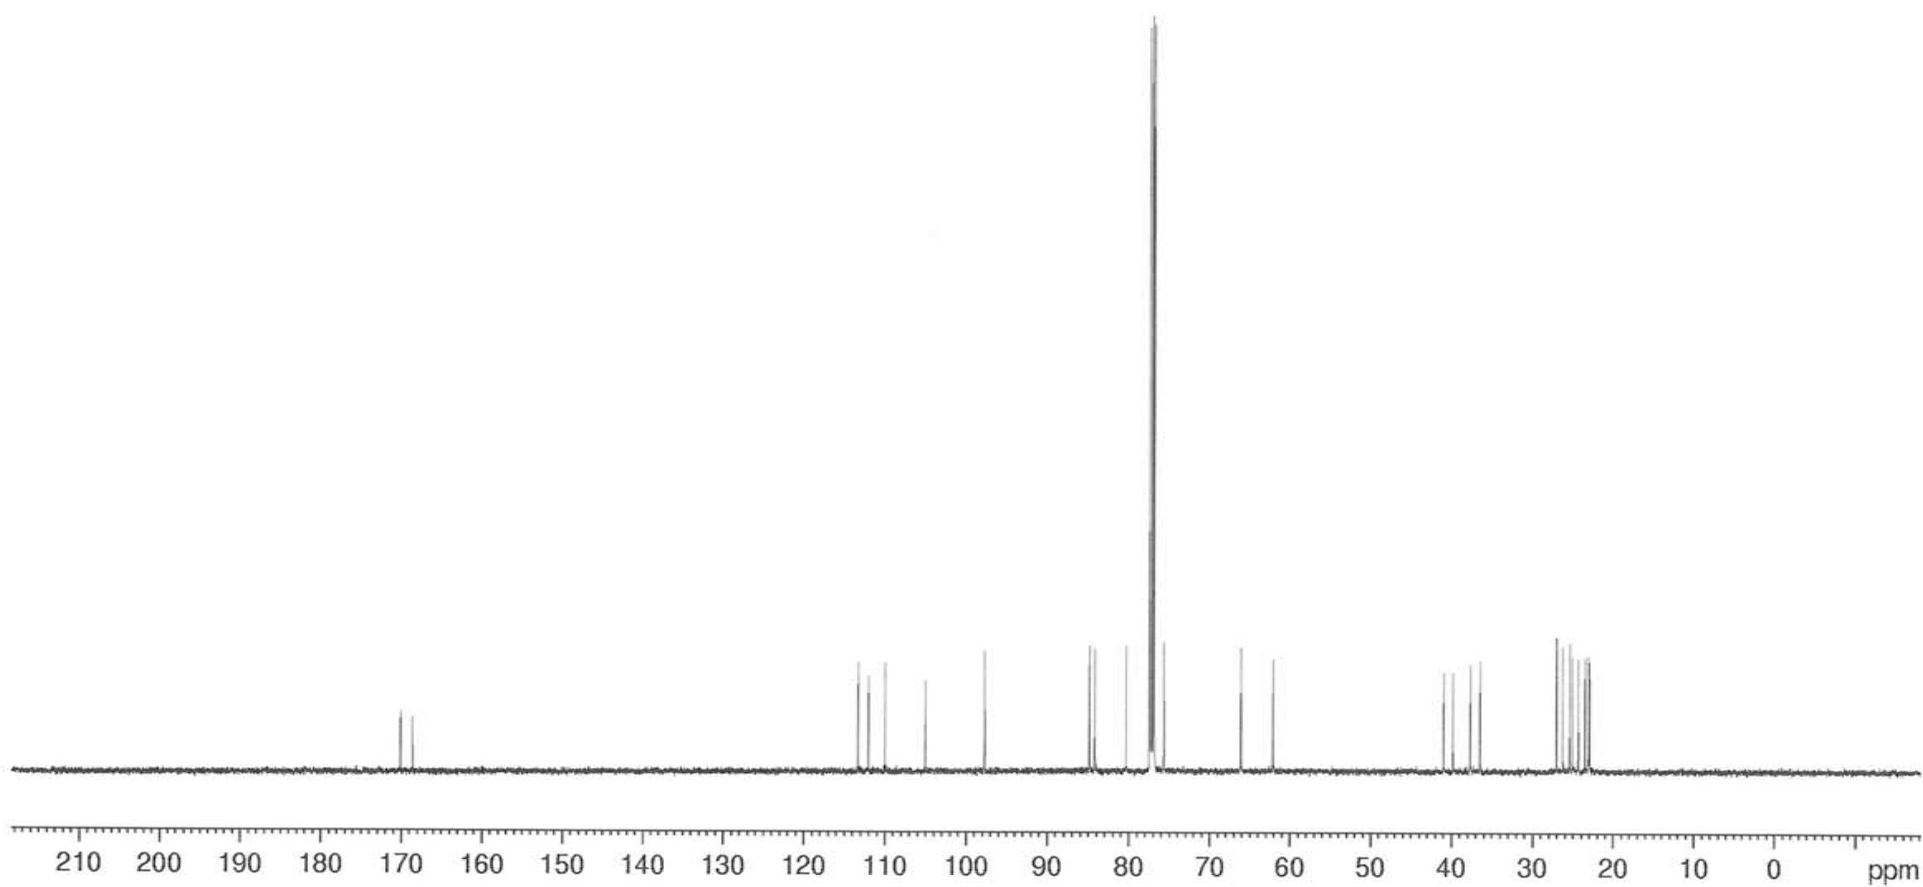

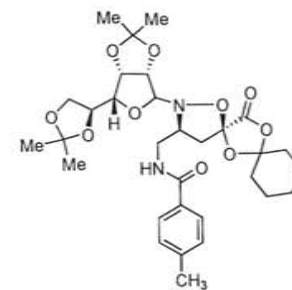

4o

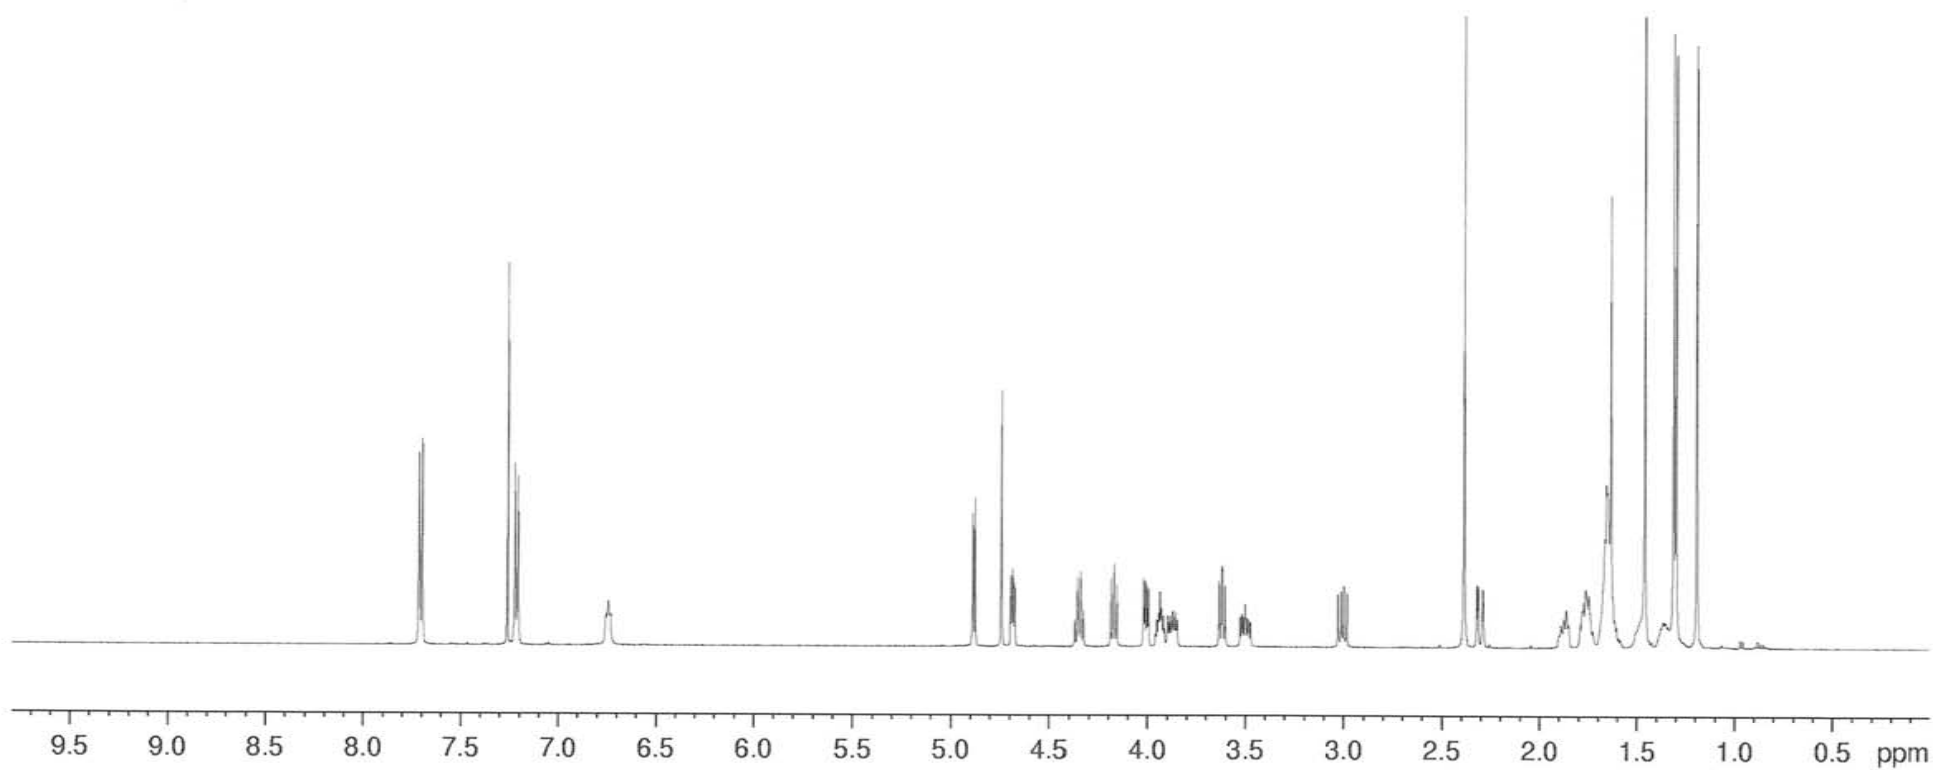

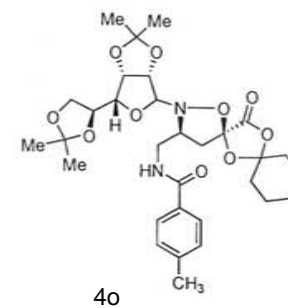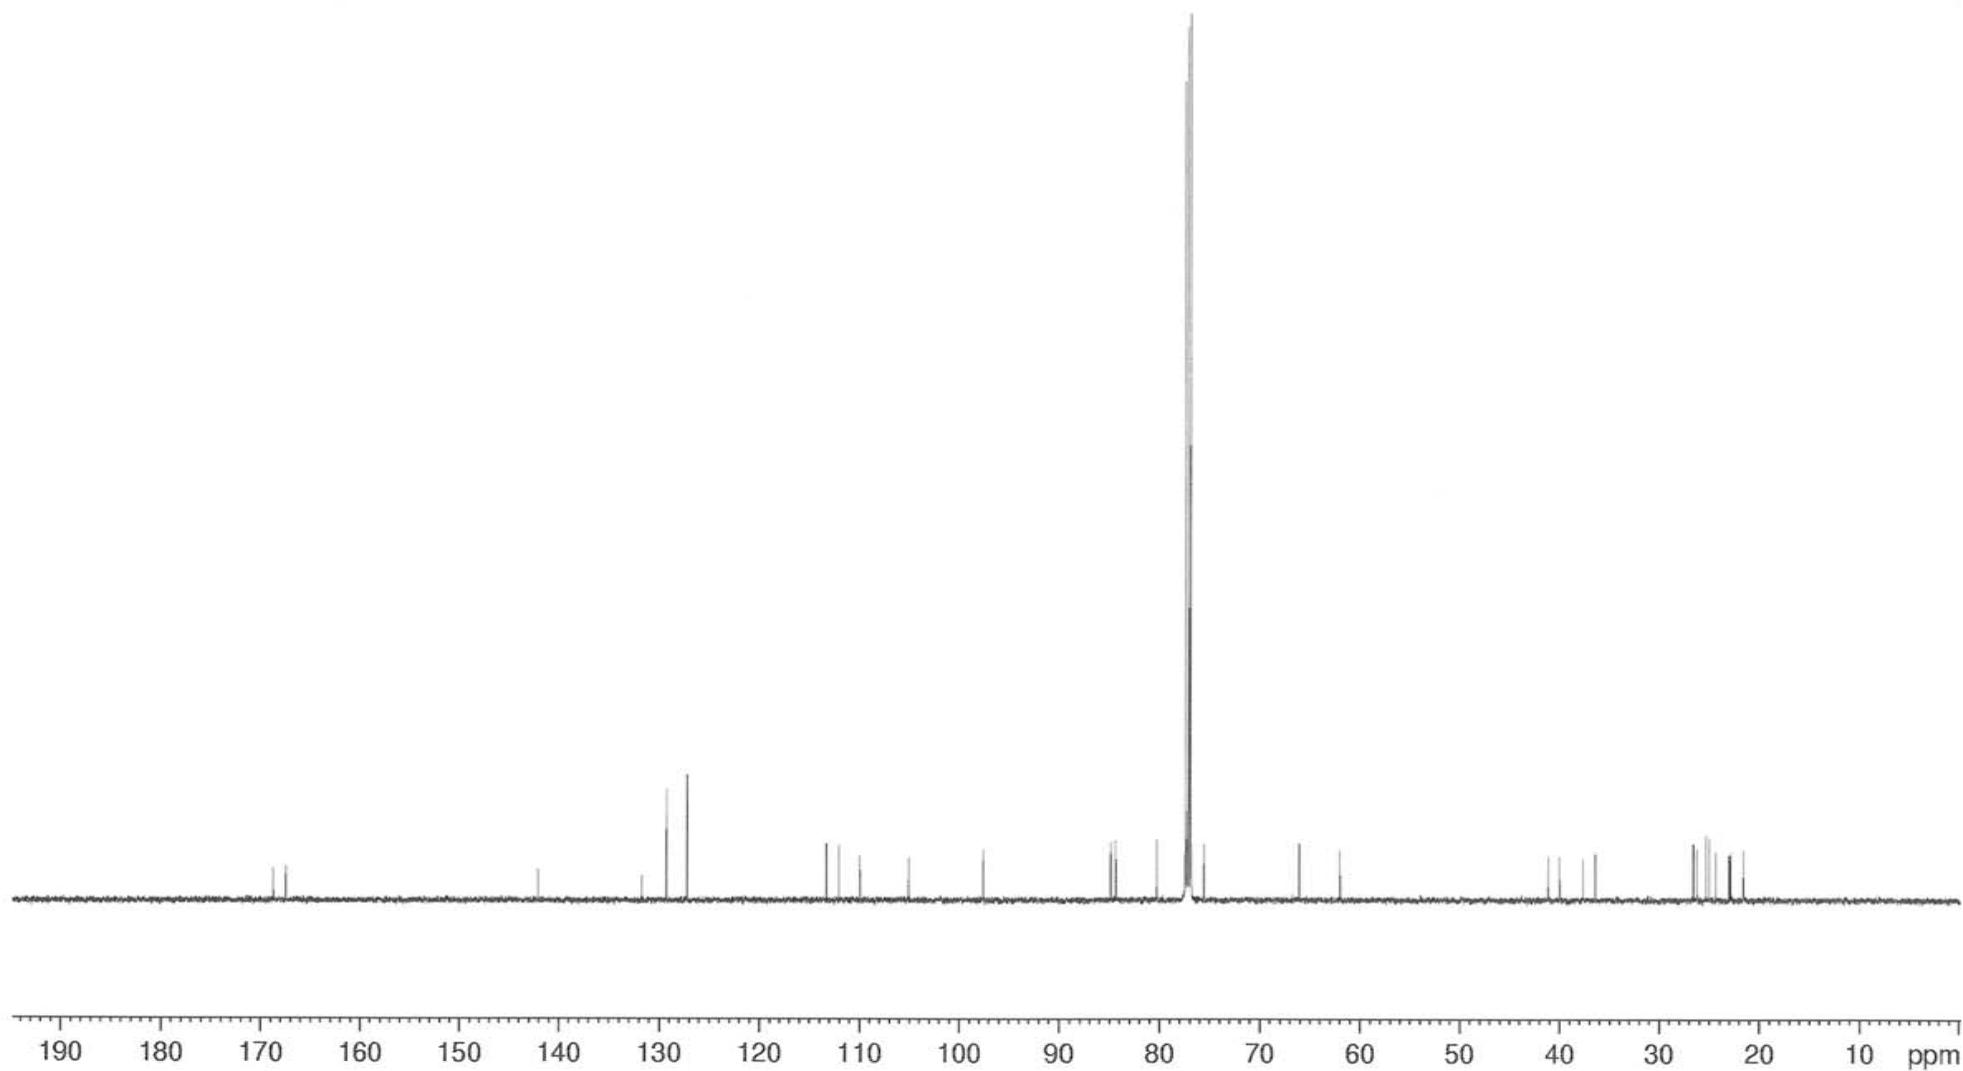

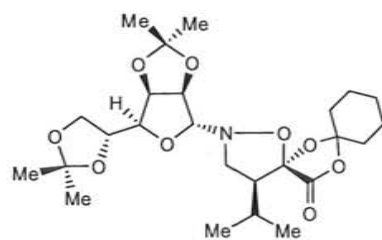

4p

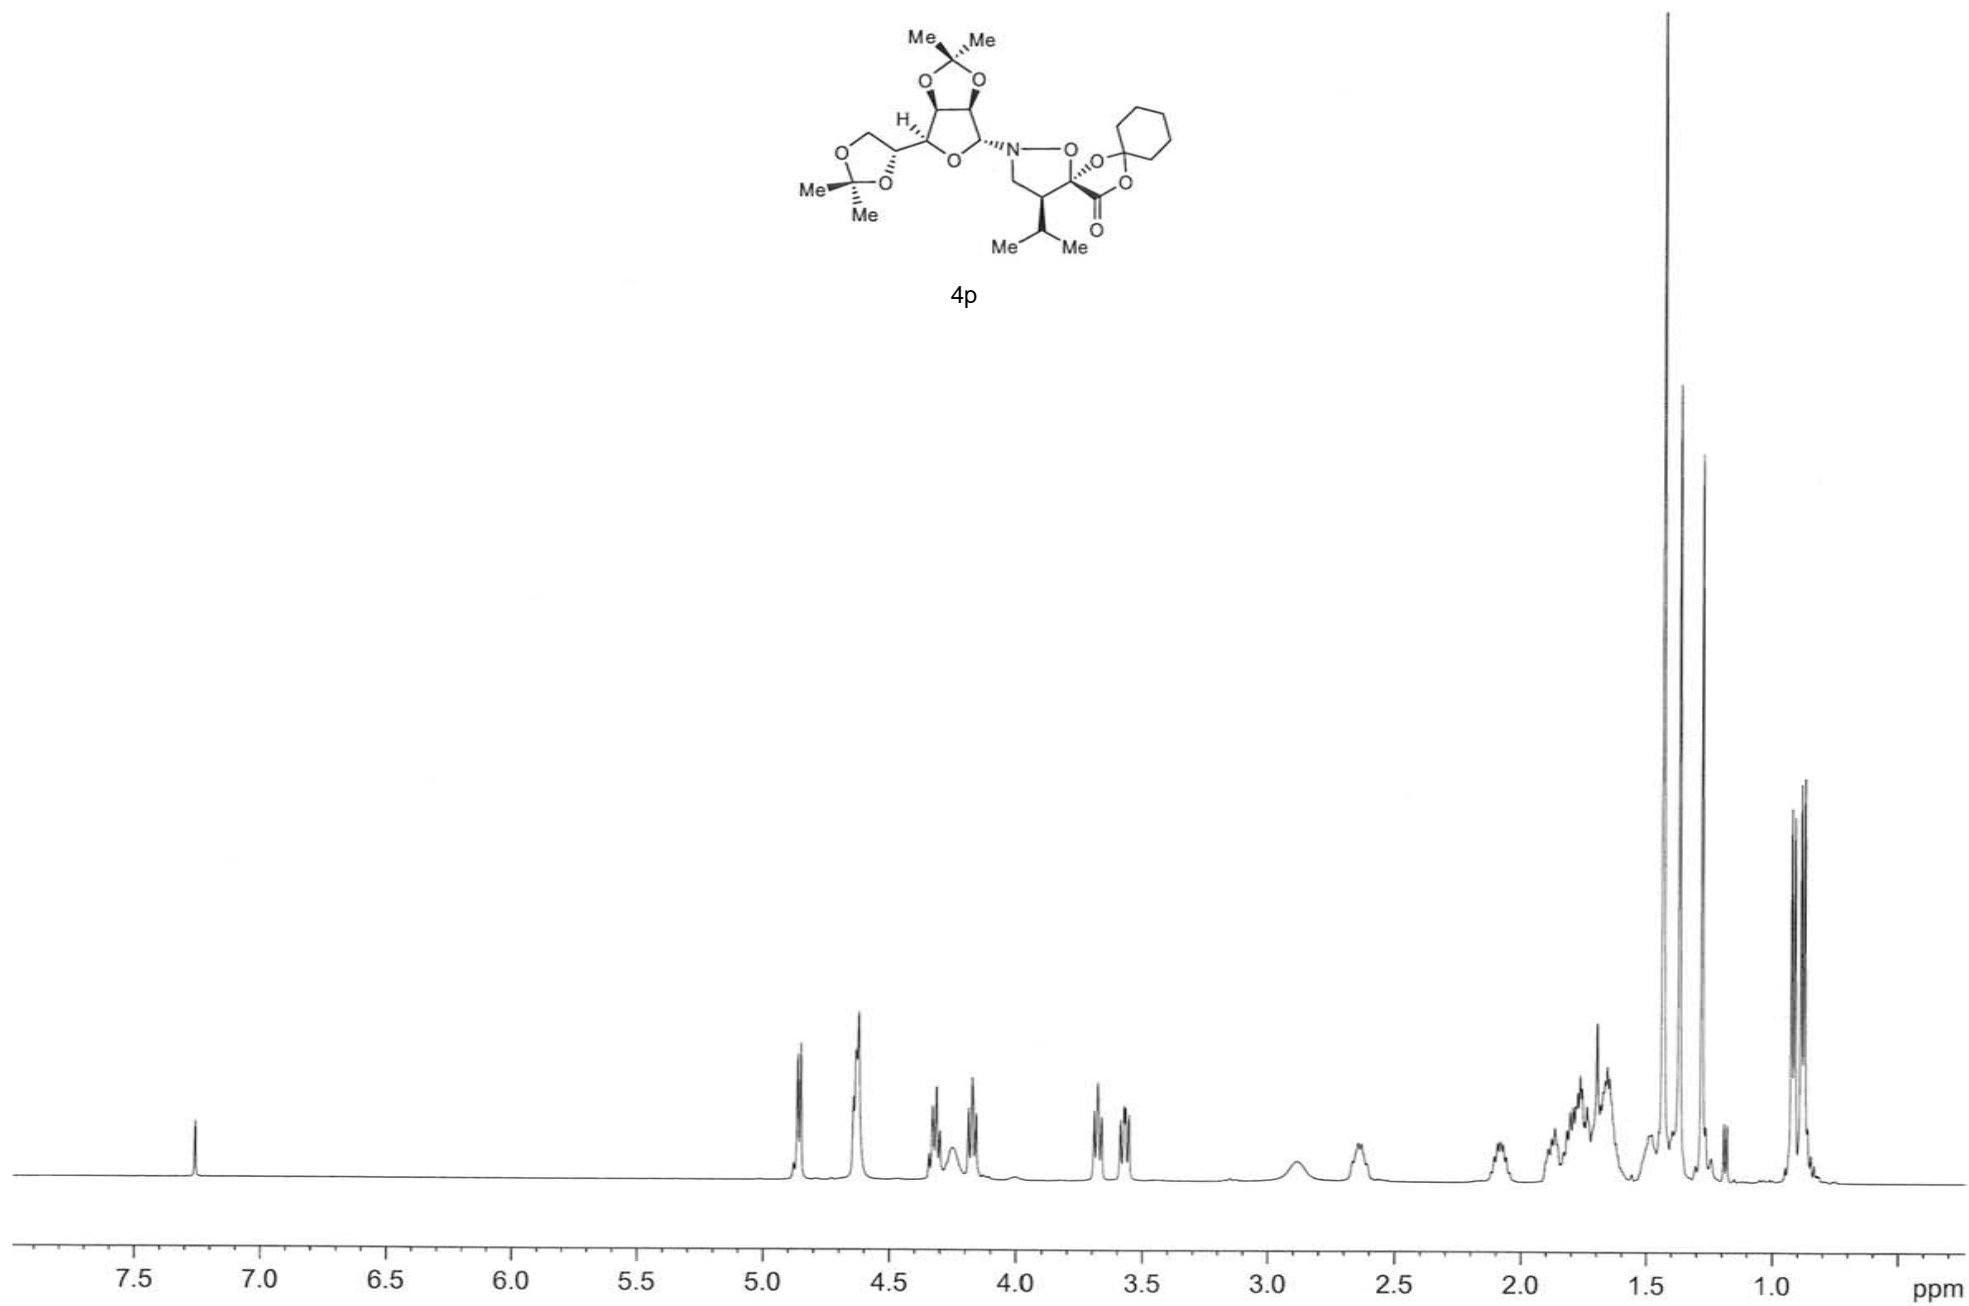

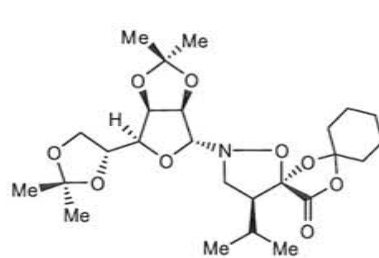

4p

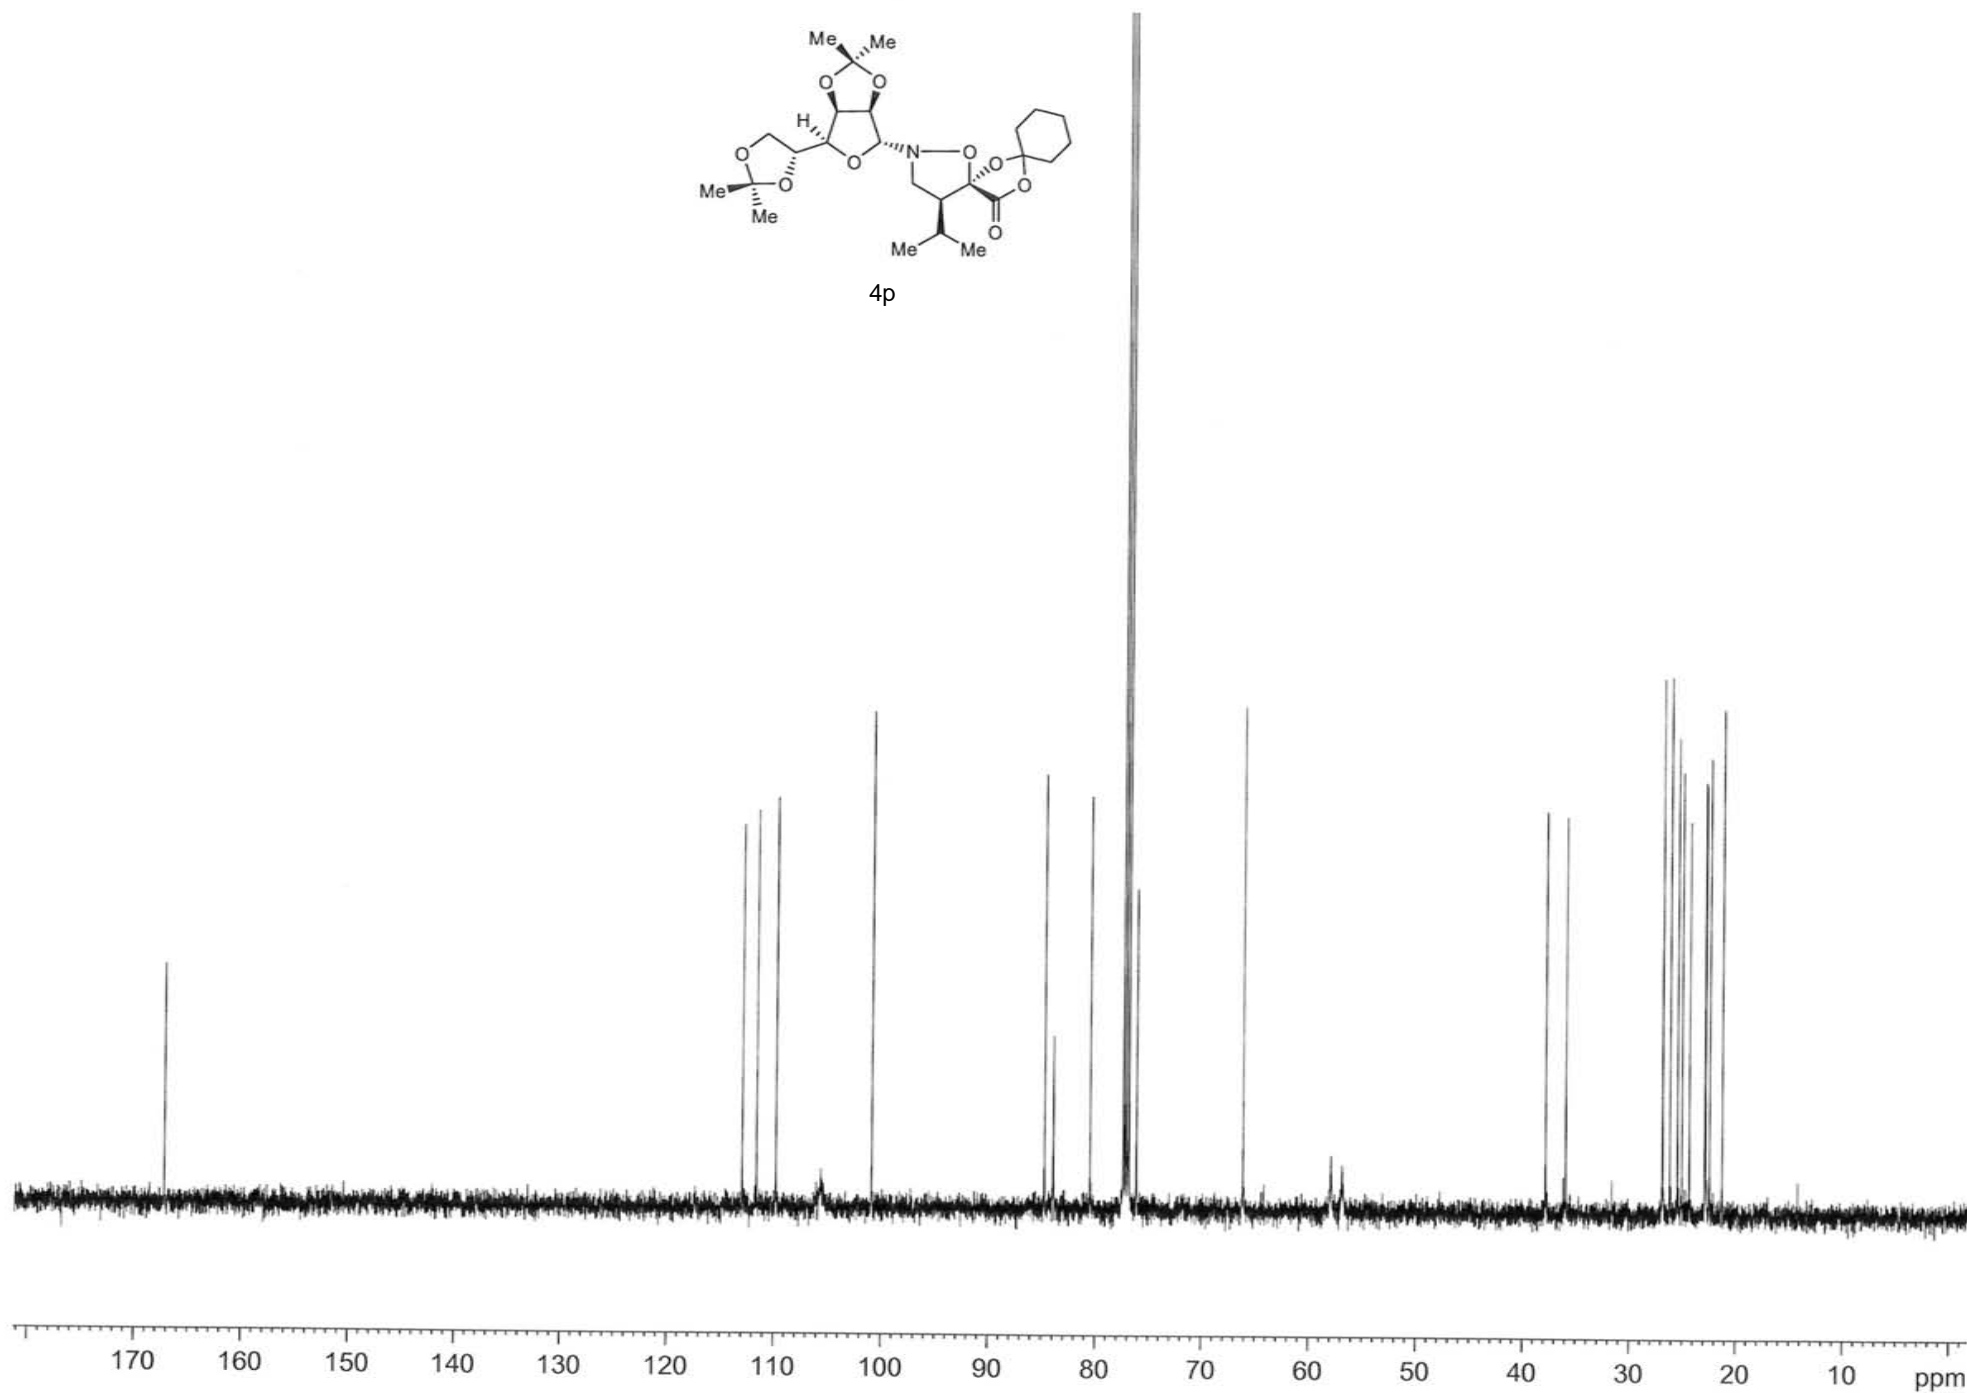



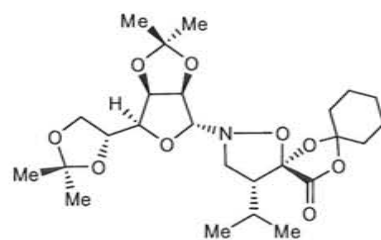

4q

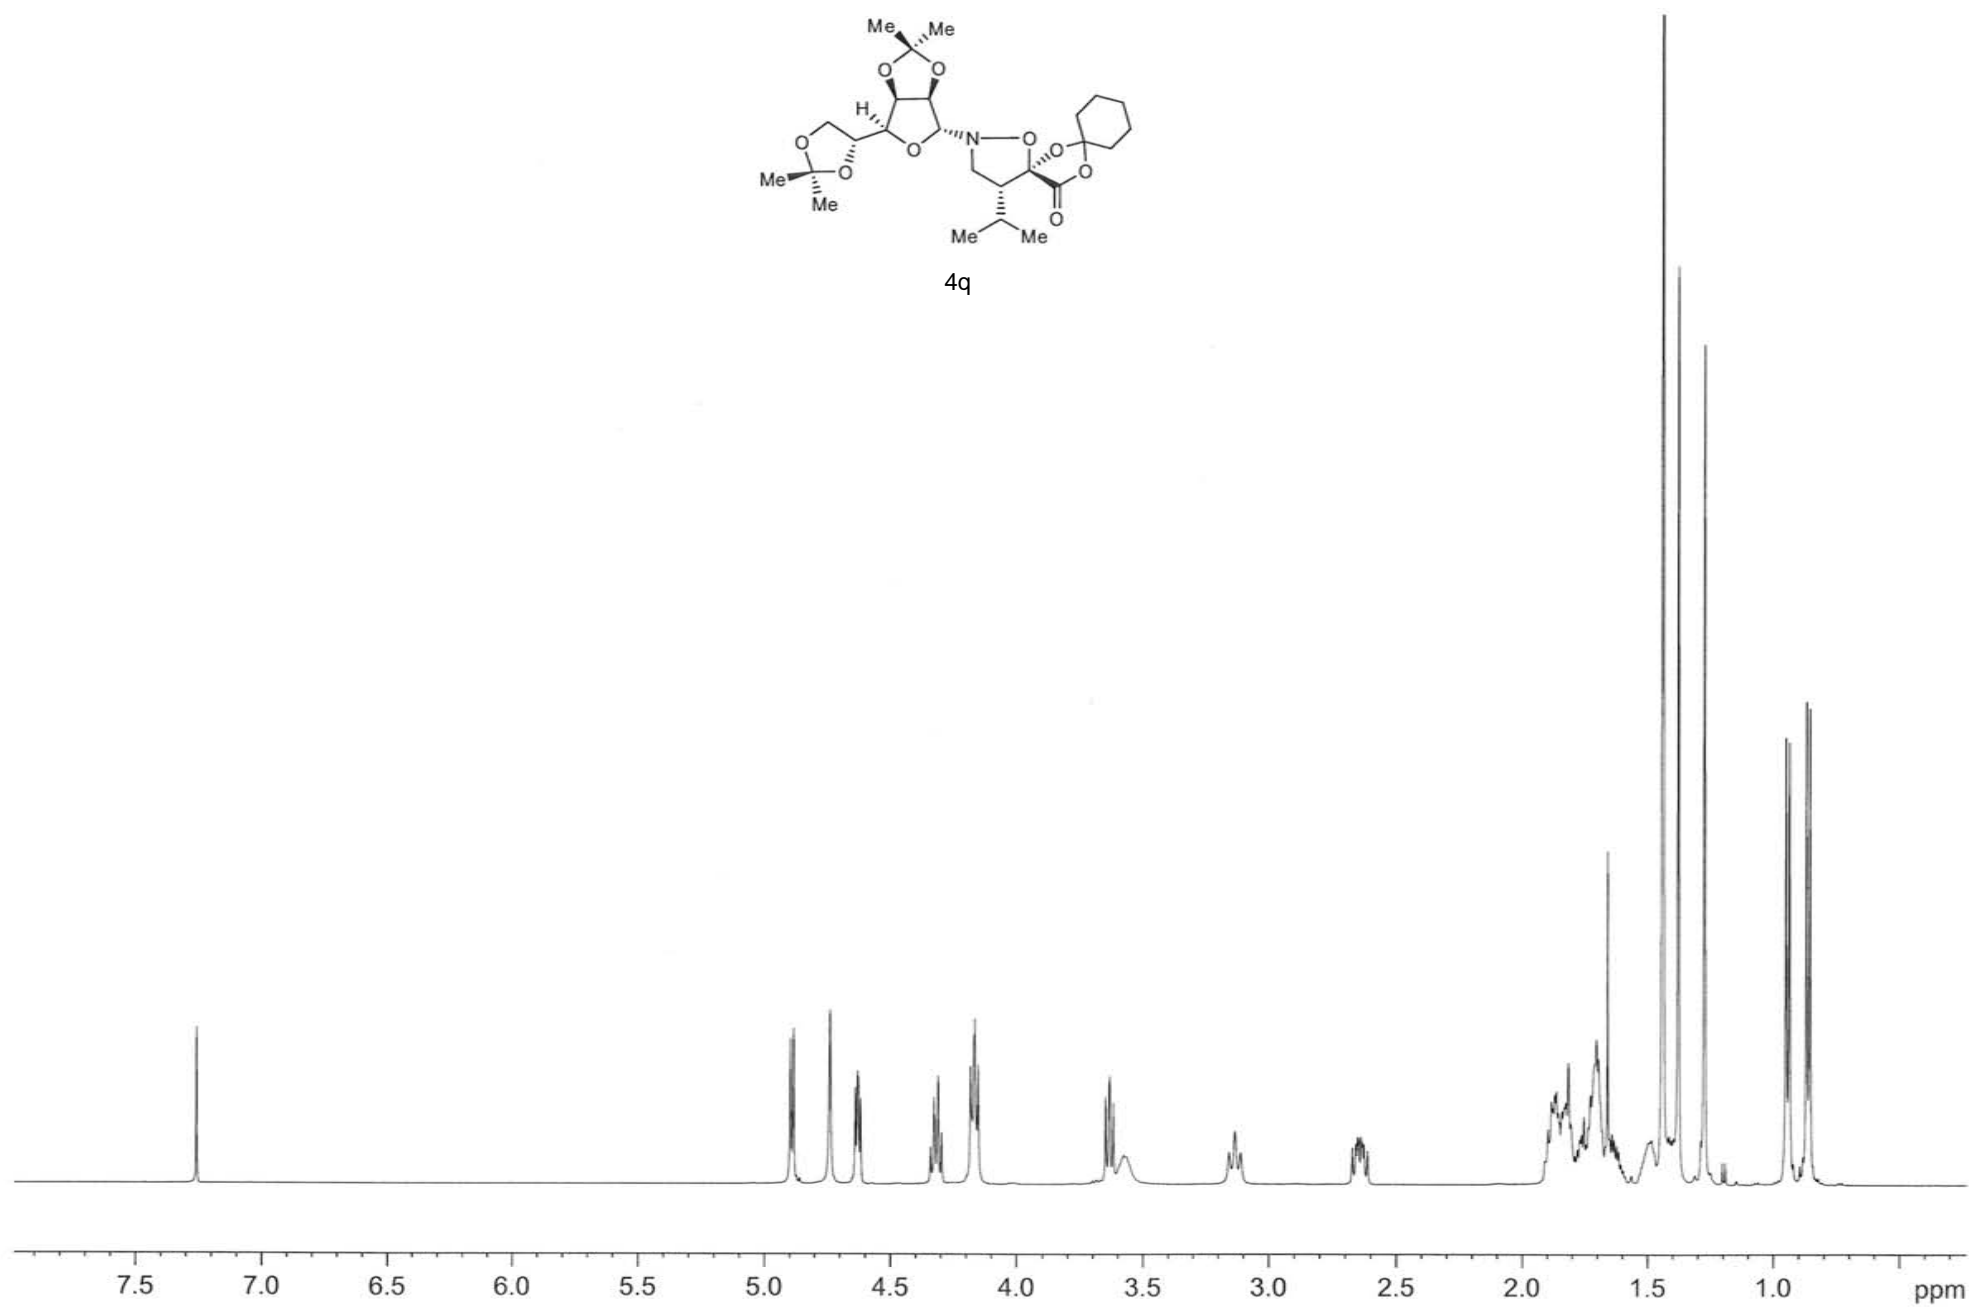

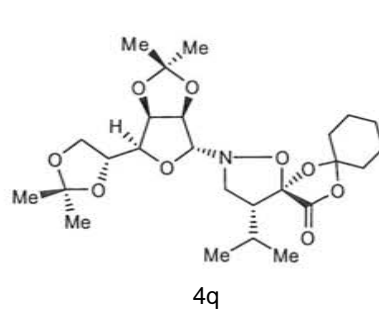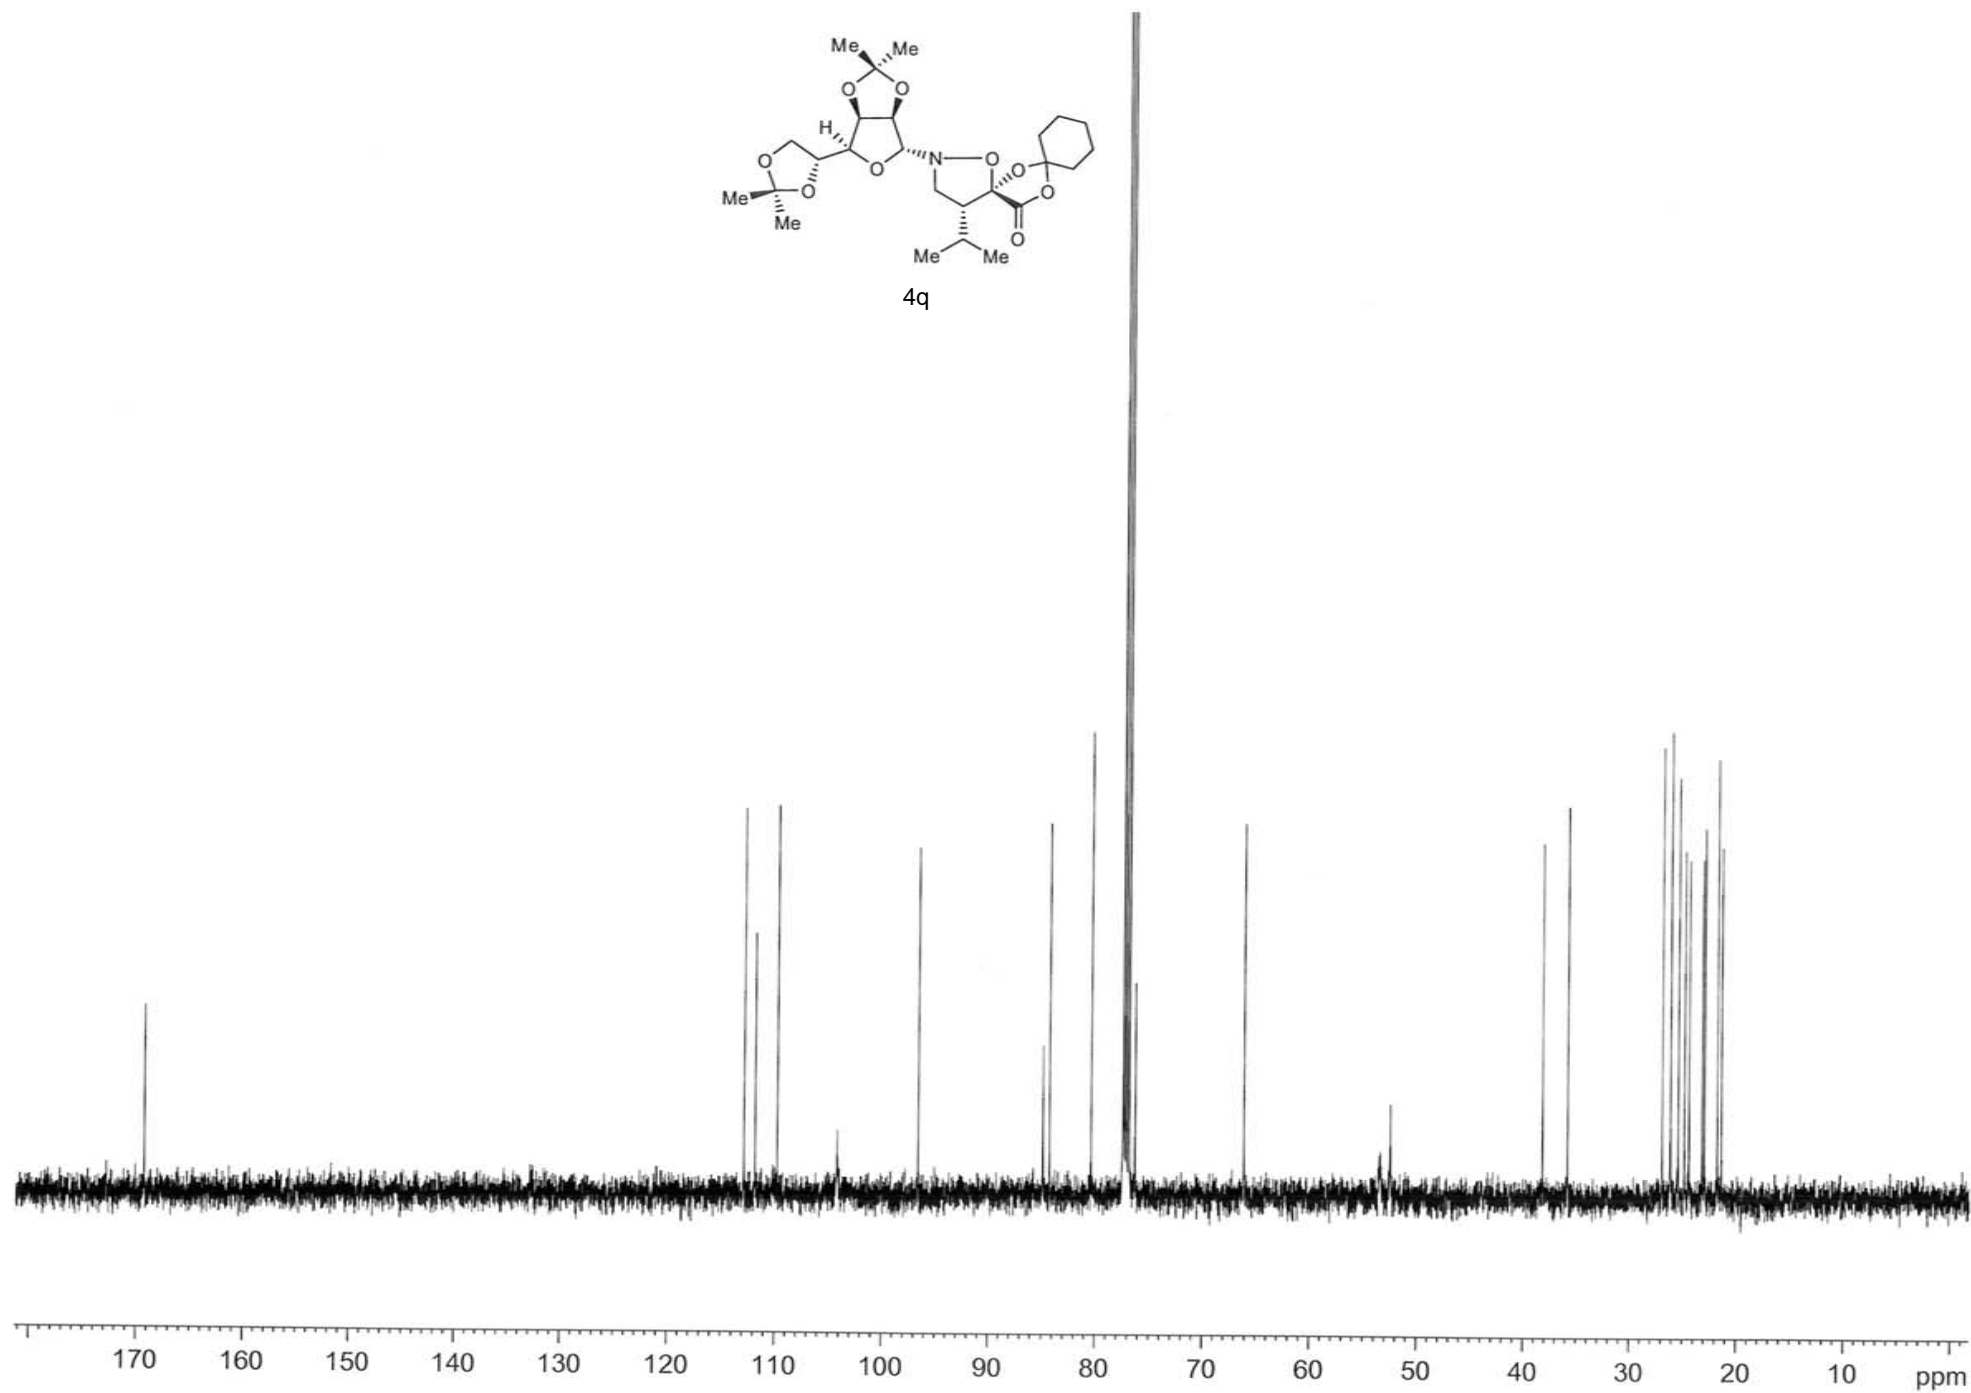

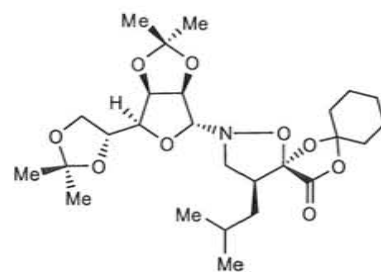

4r

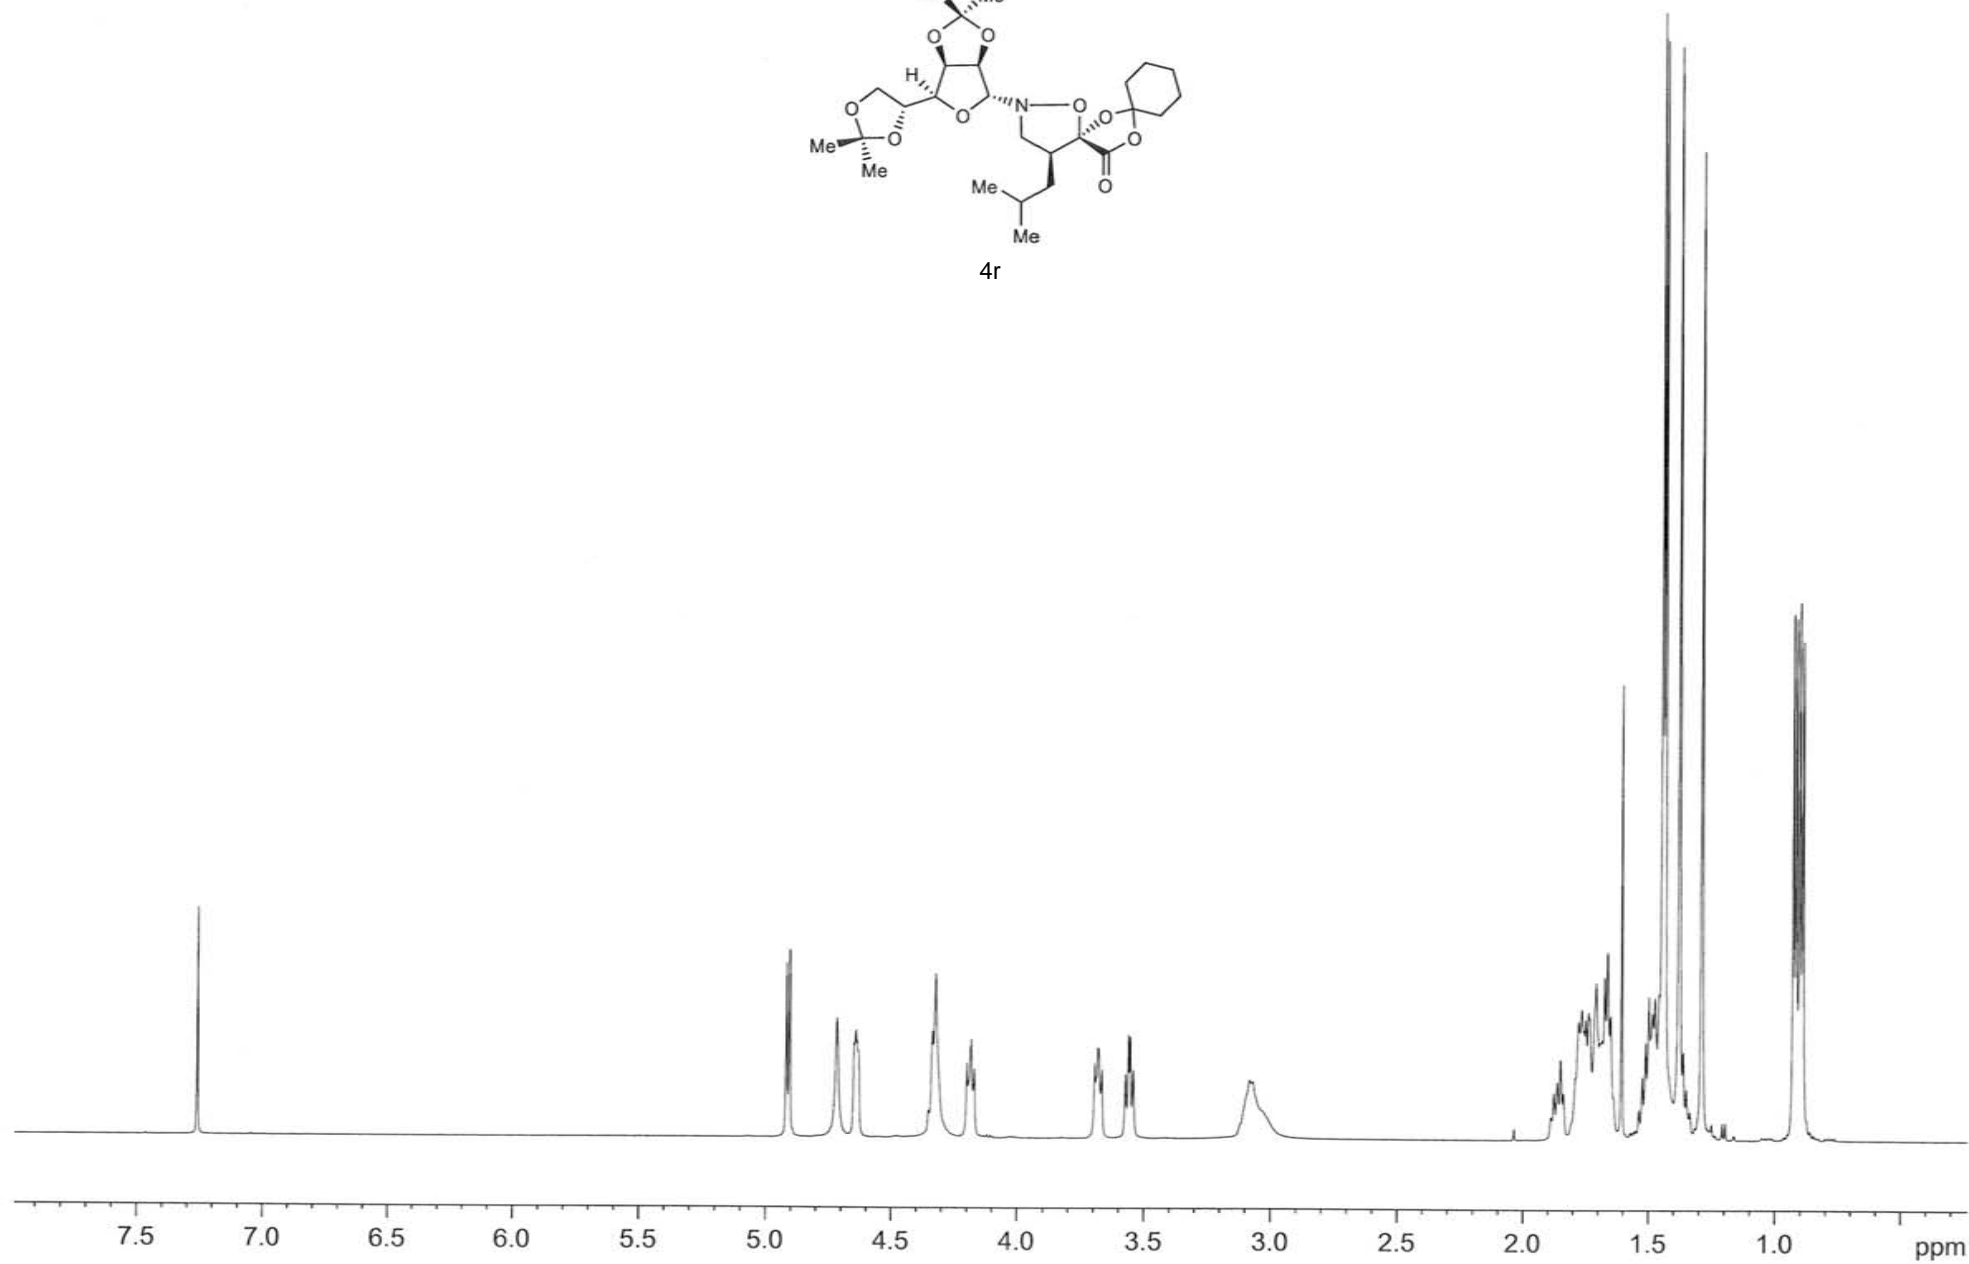

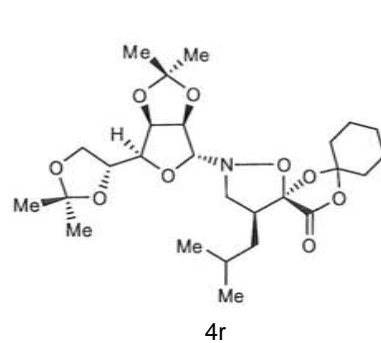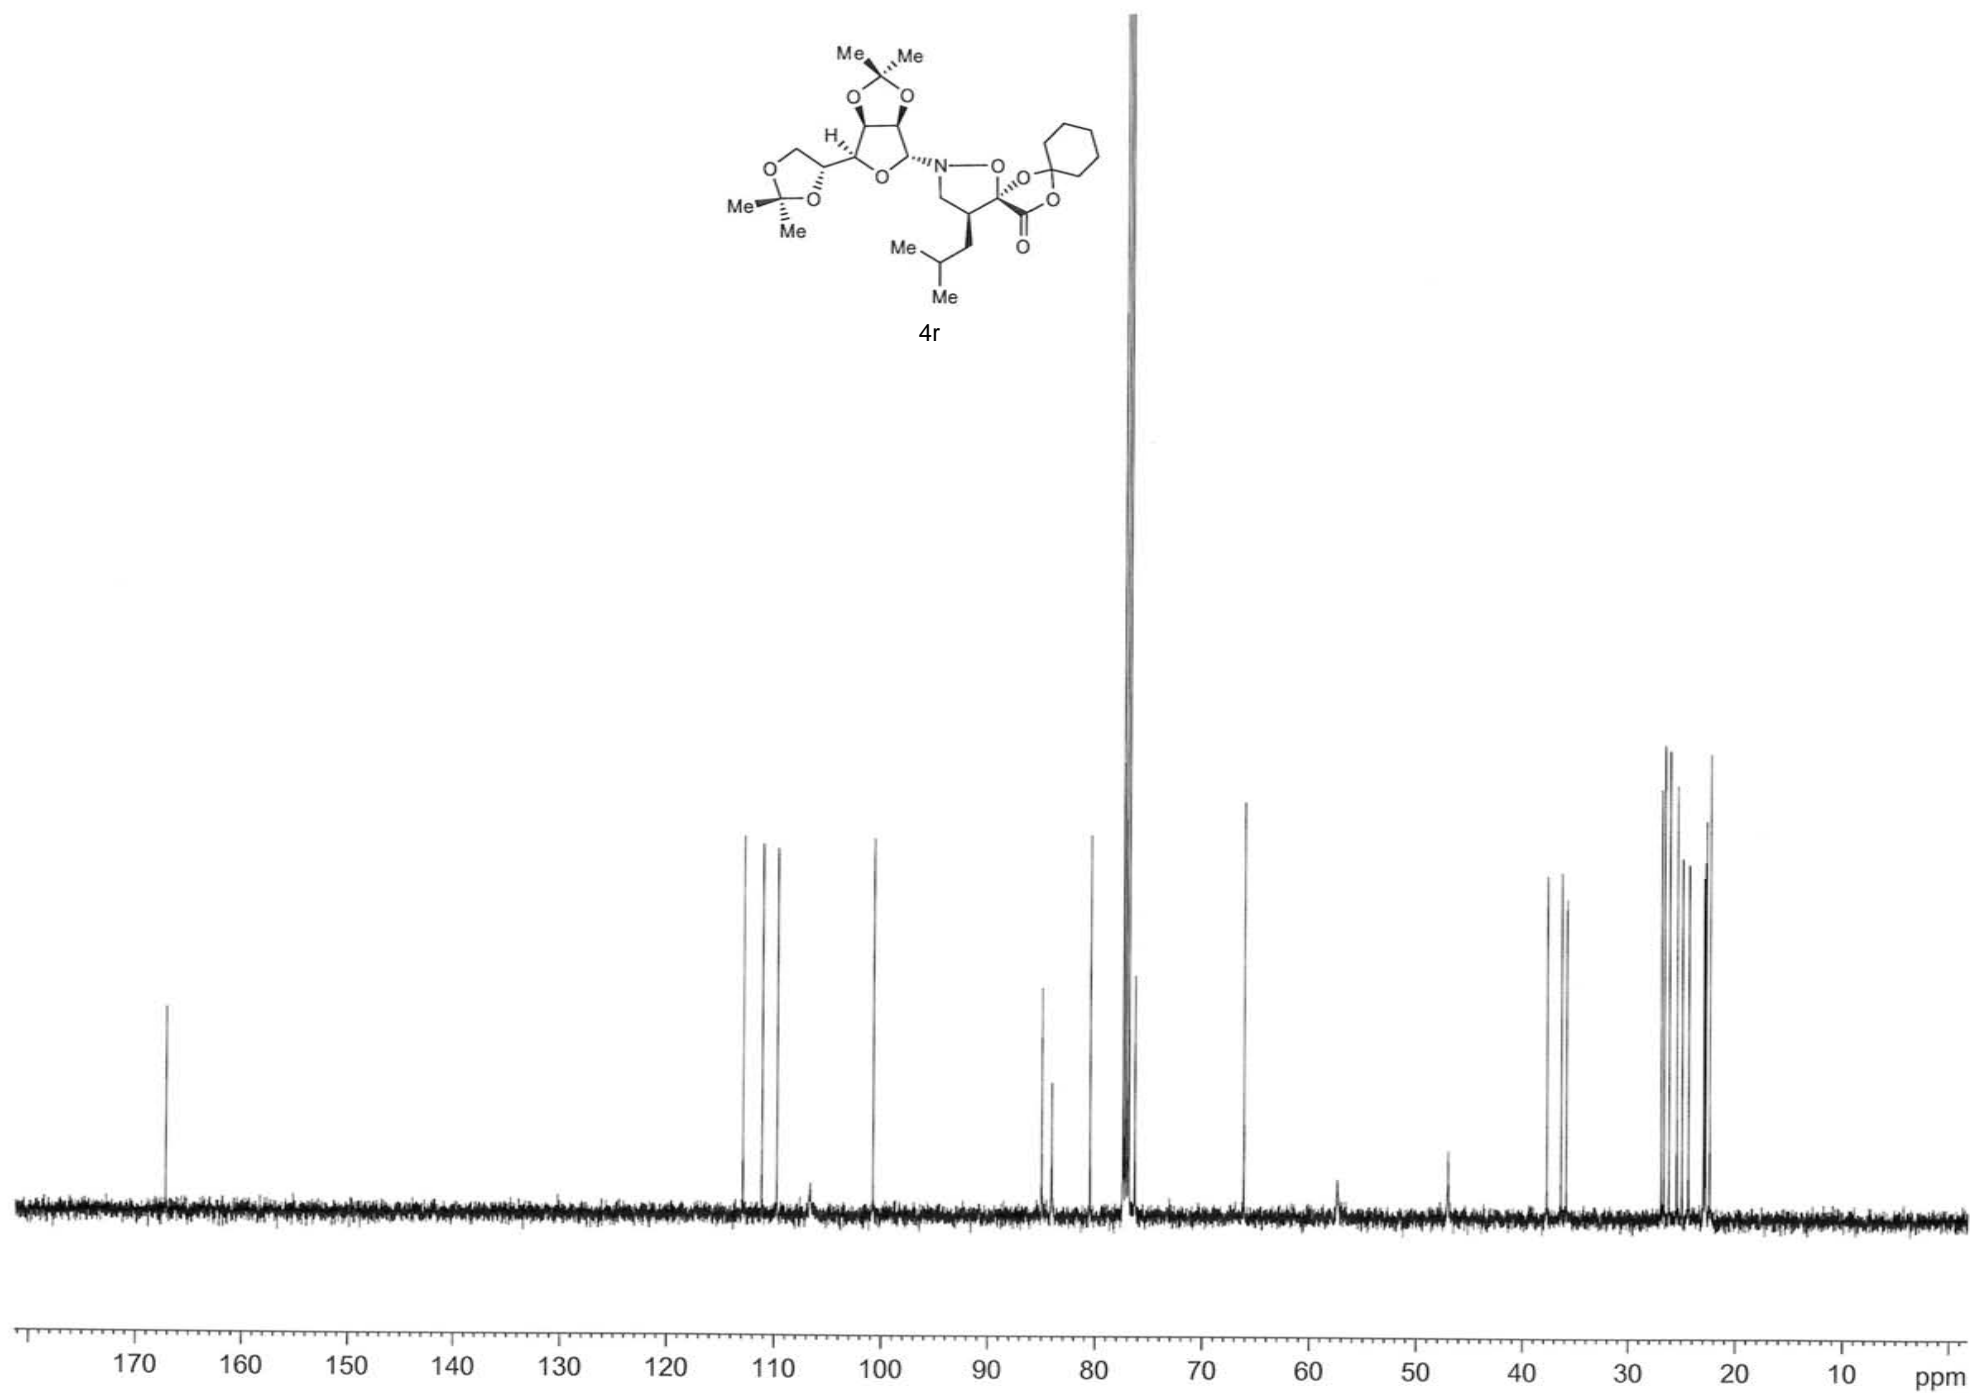

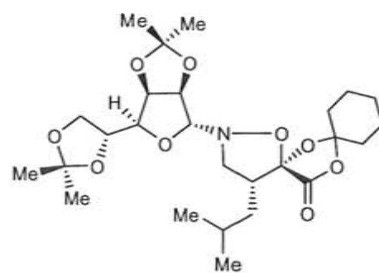

4s

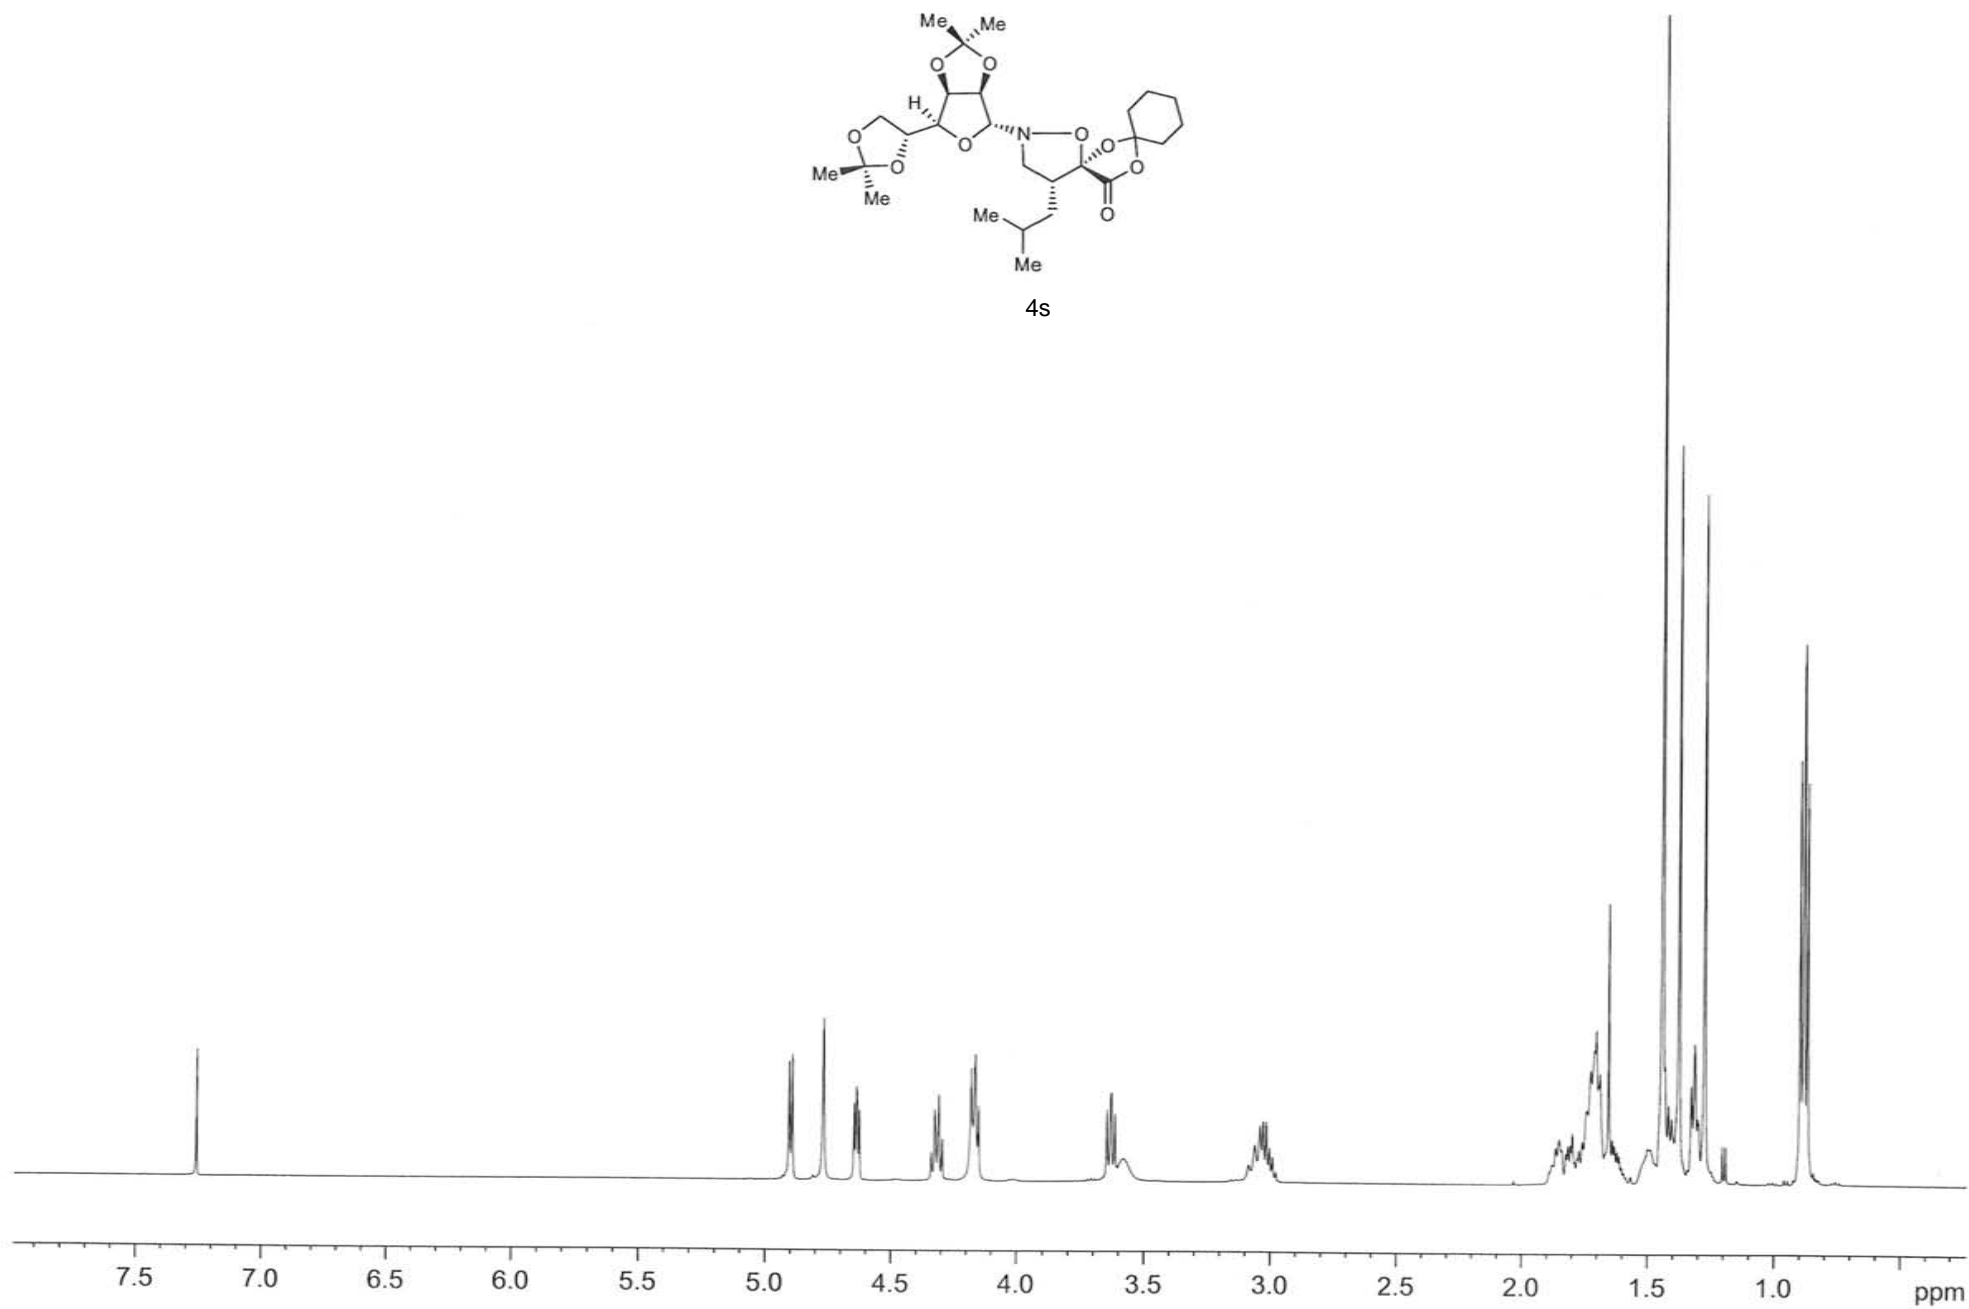

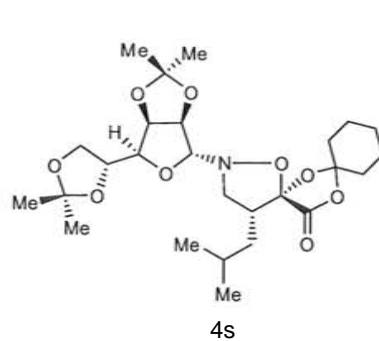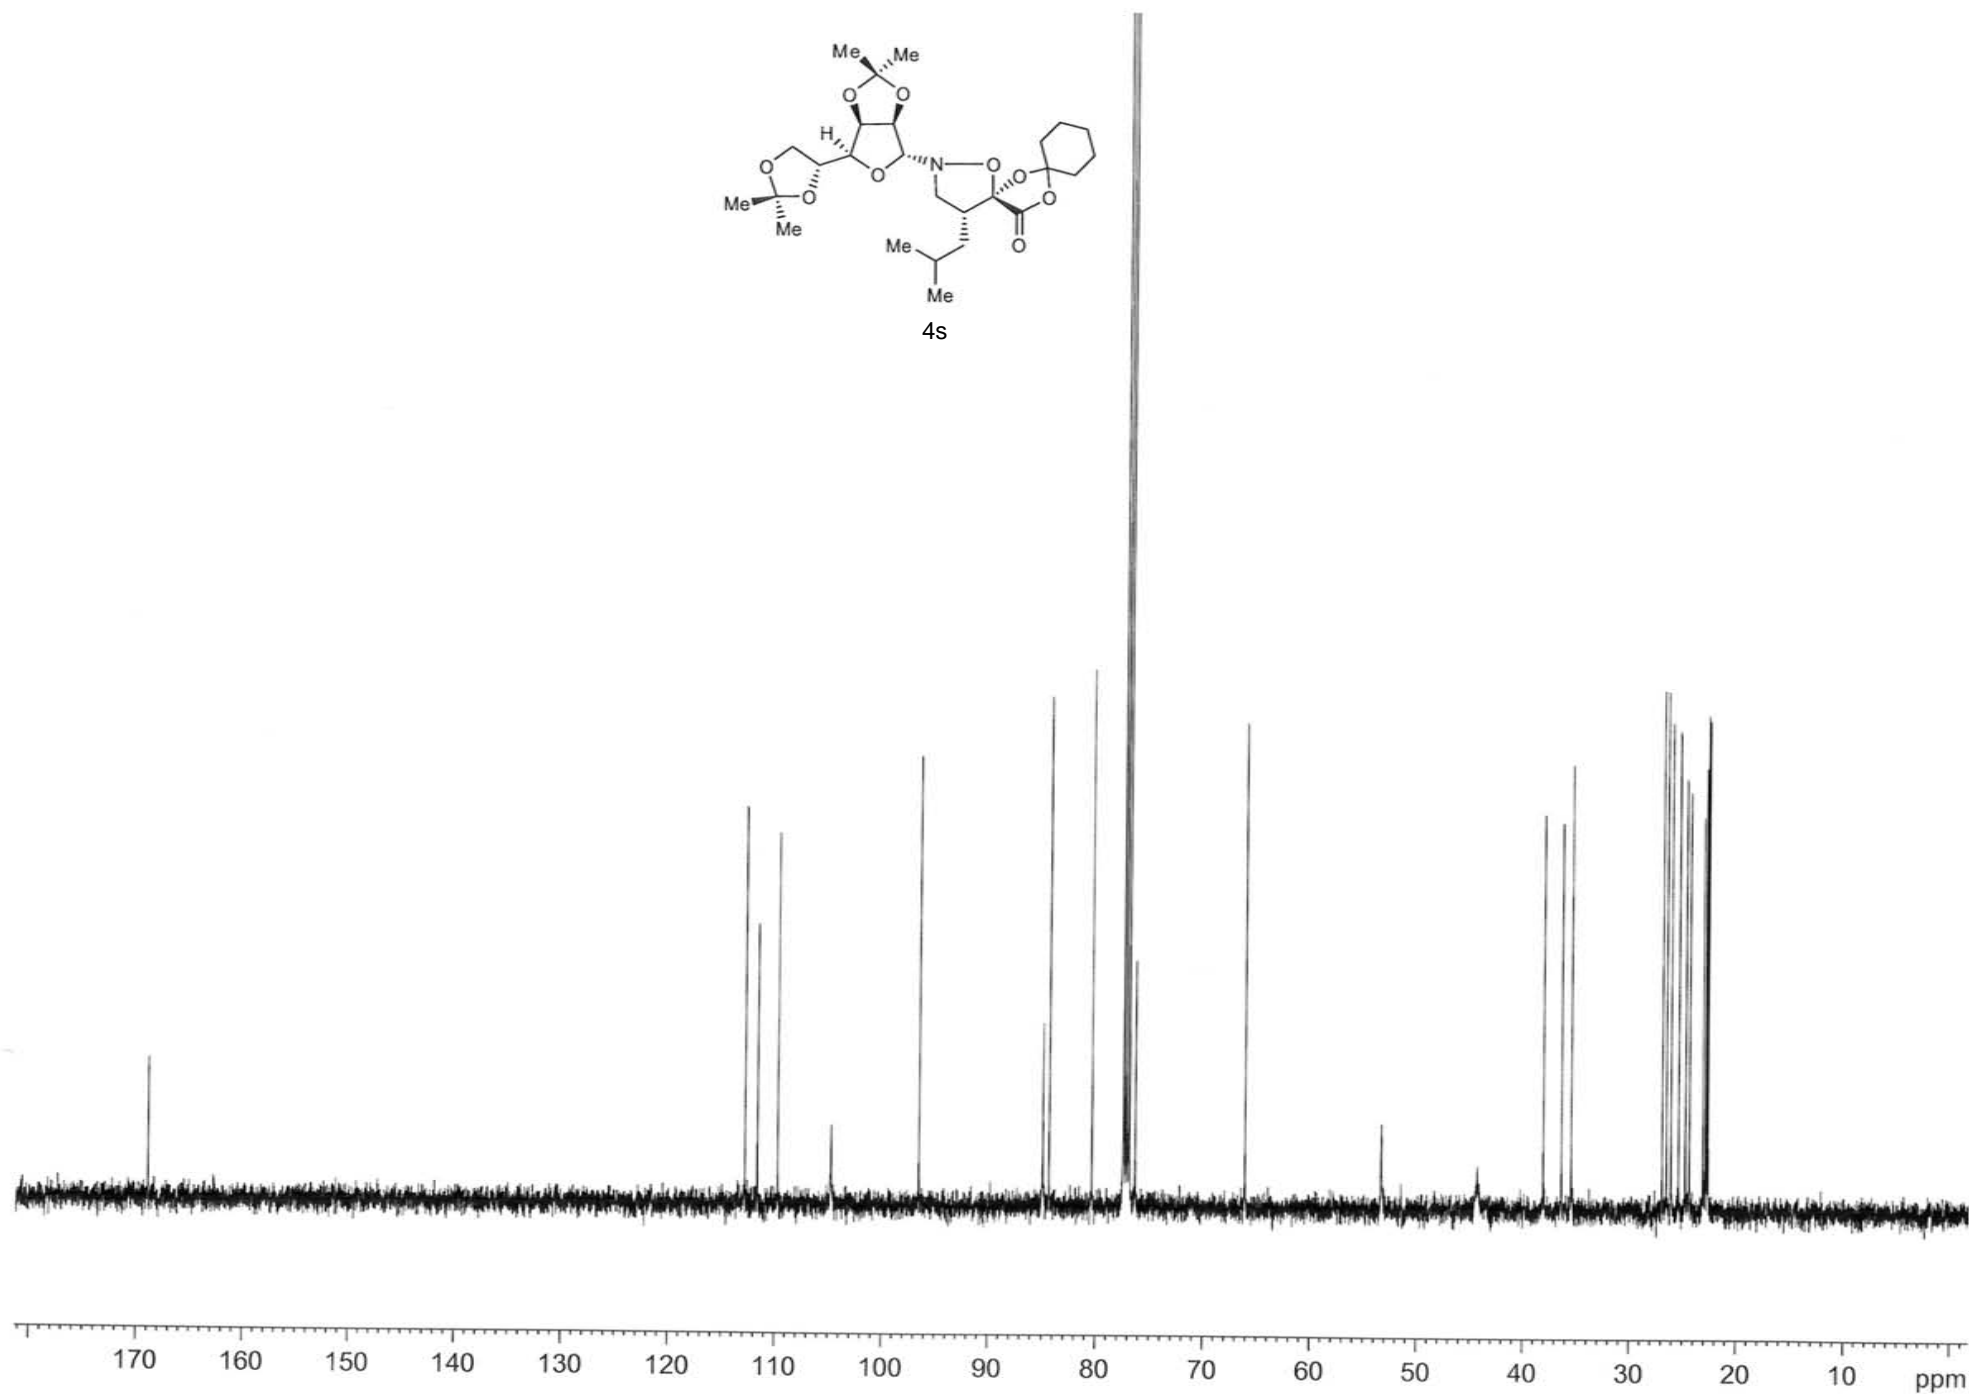

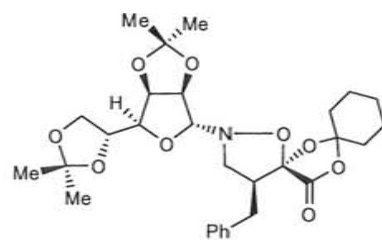

4t

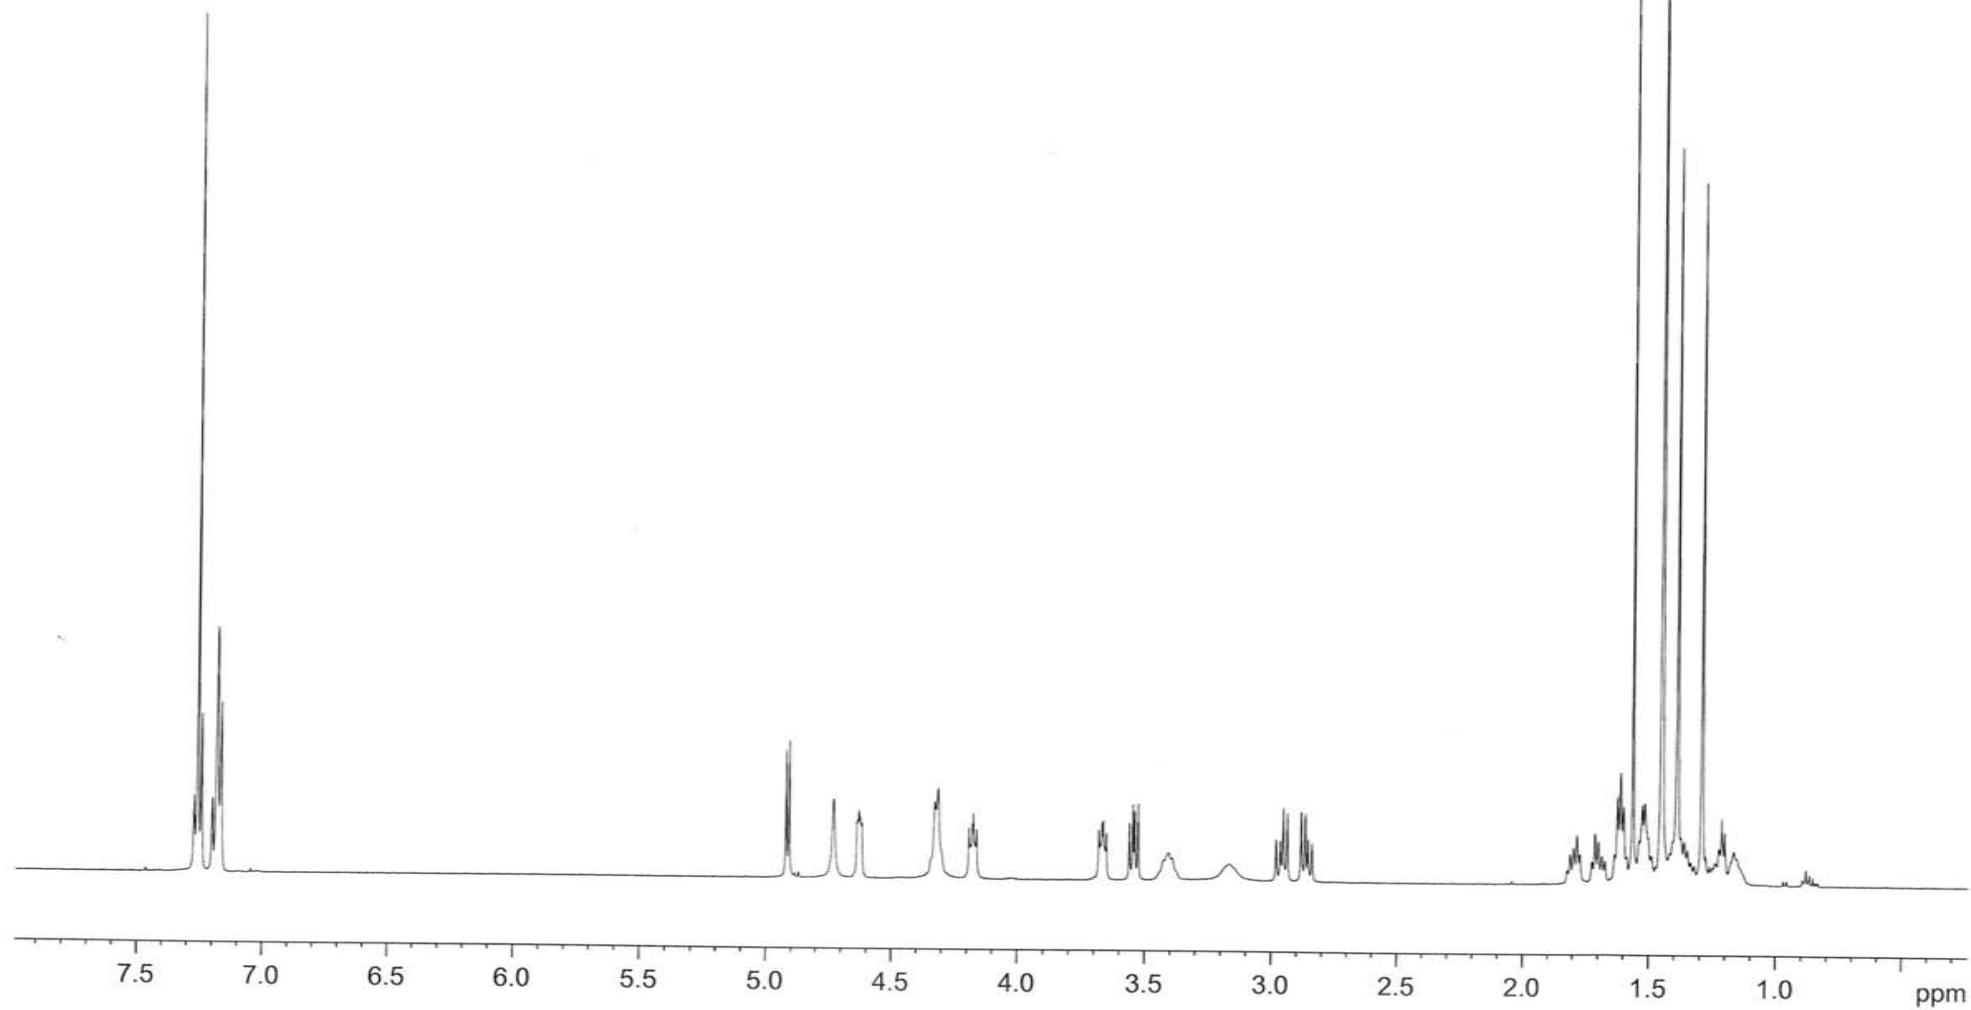

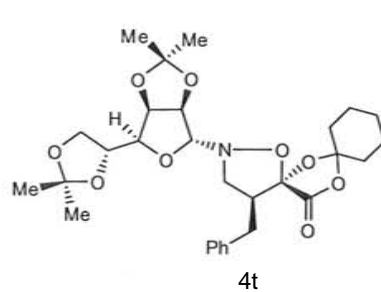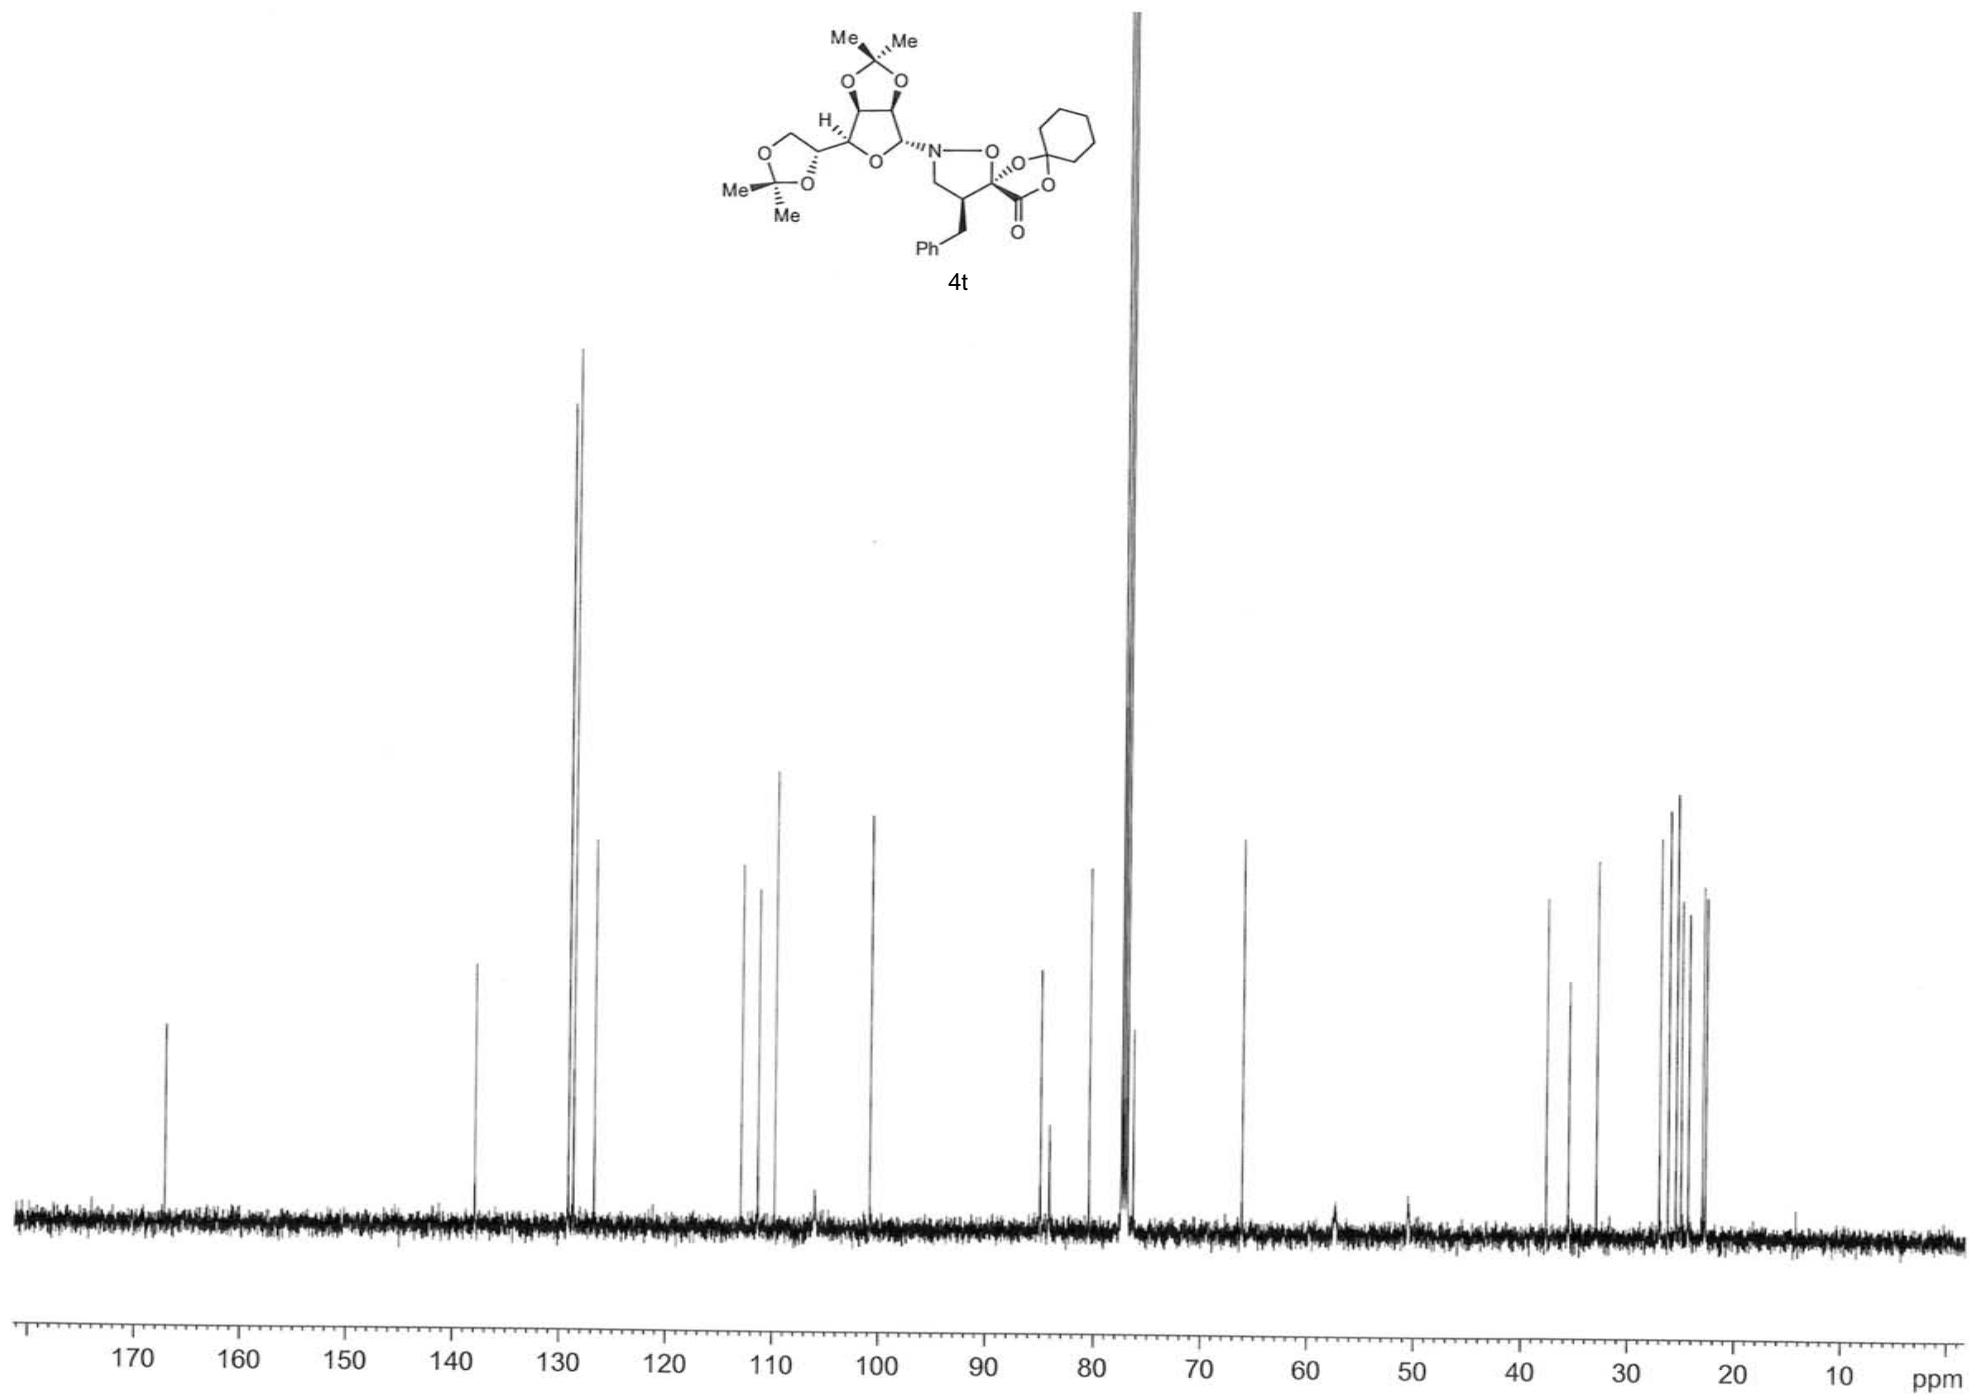



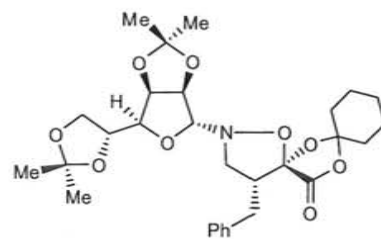

4u

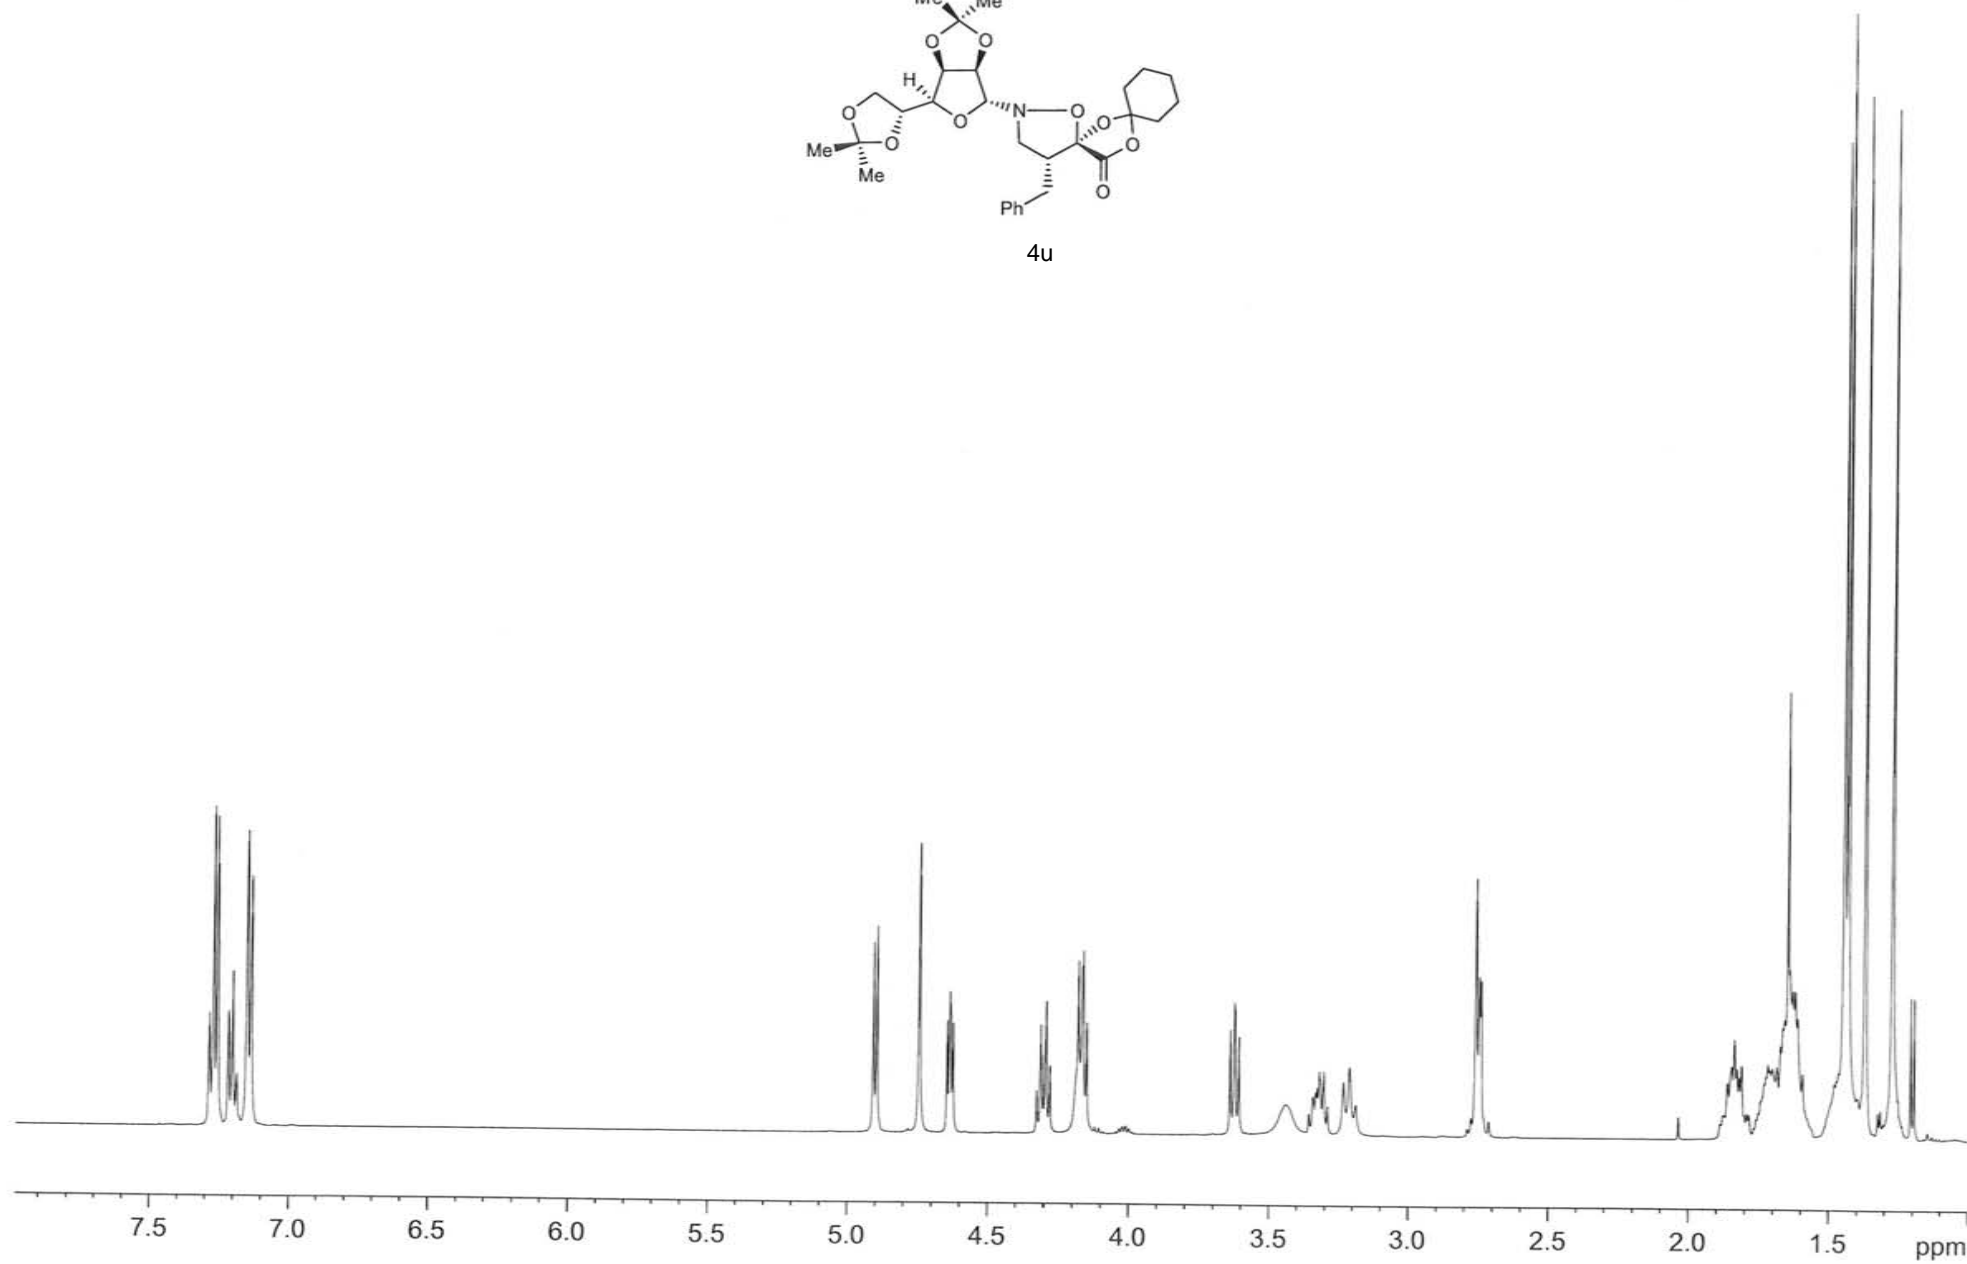

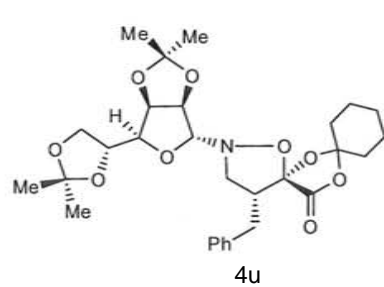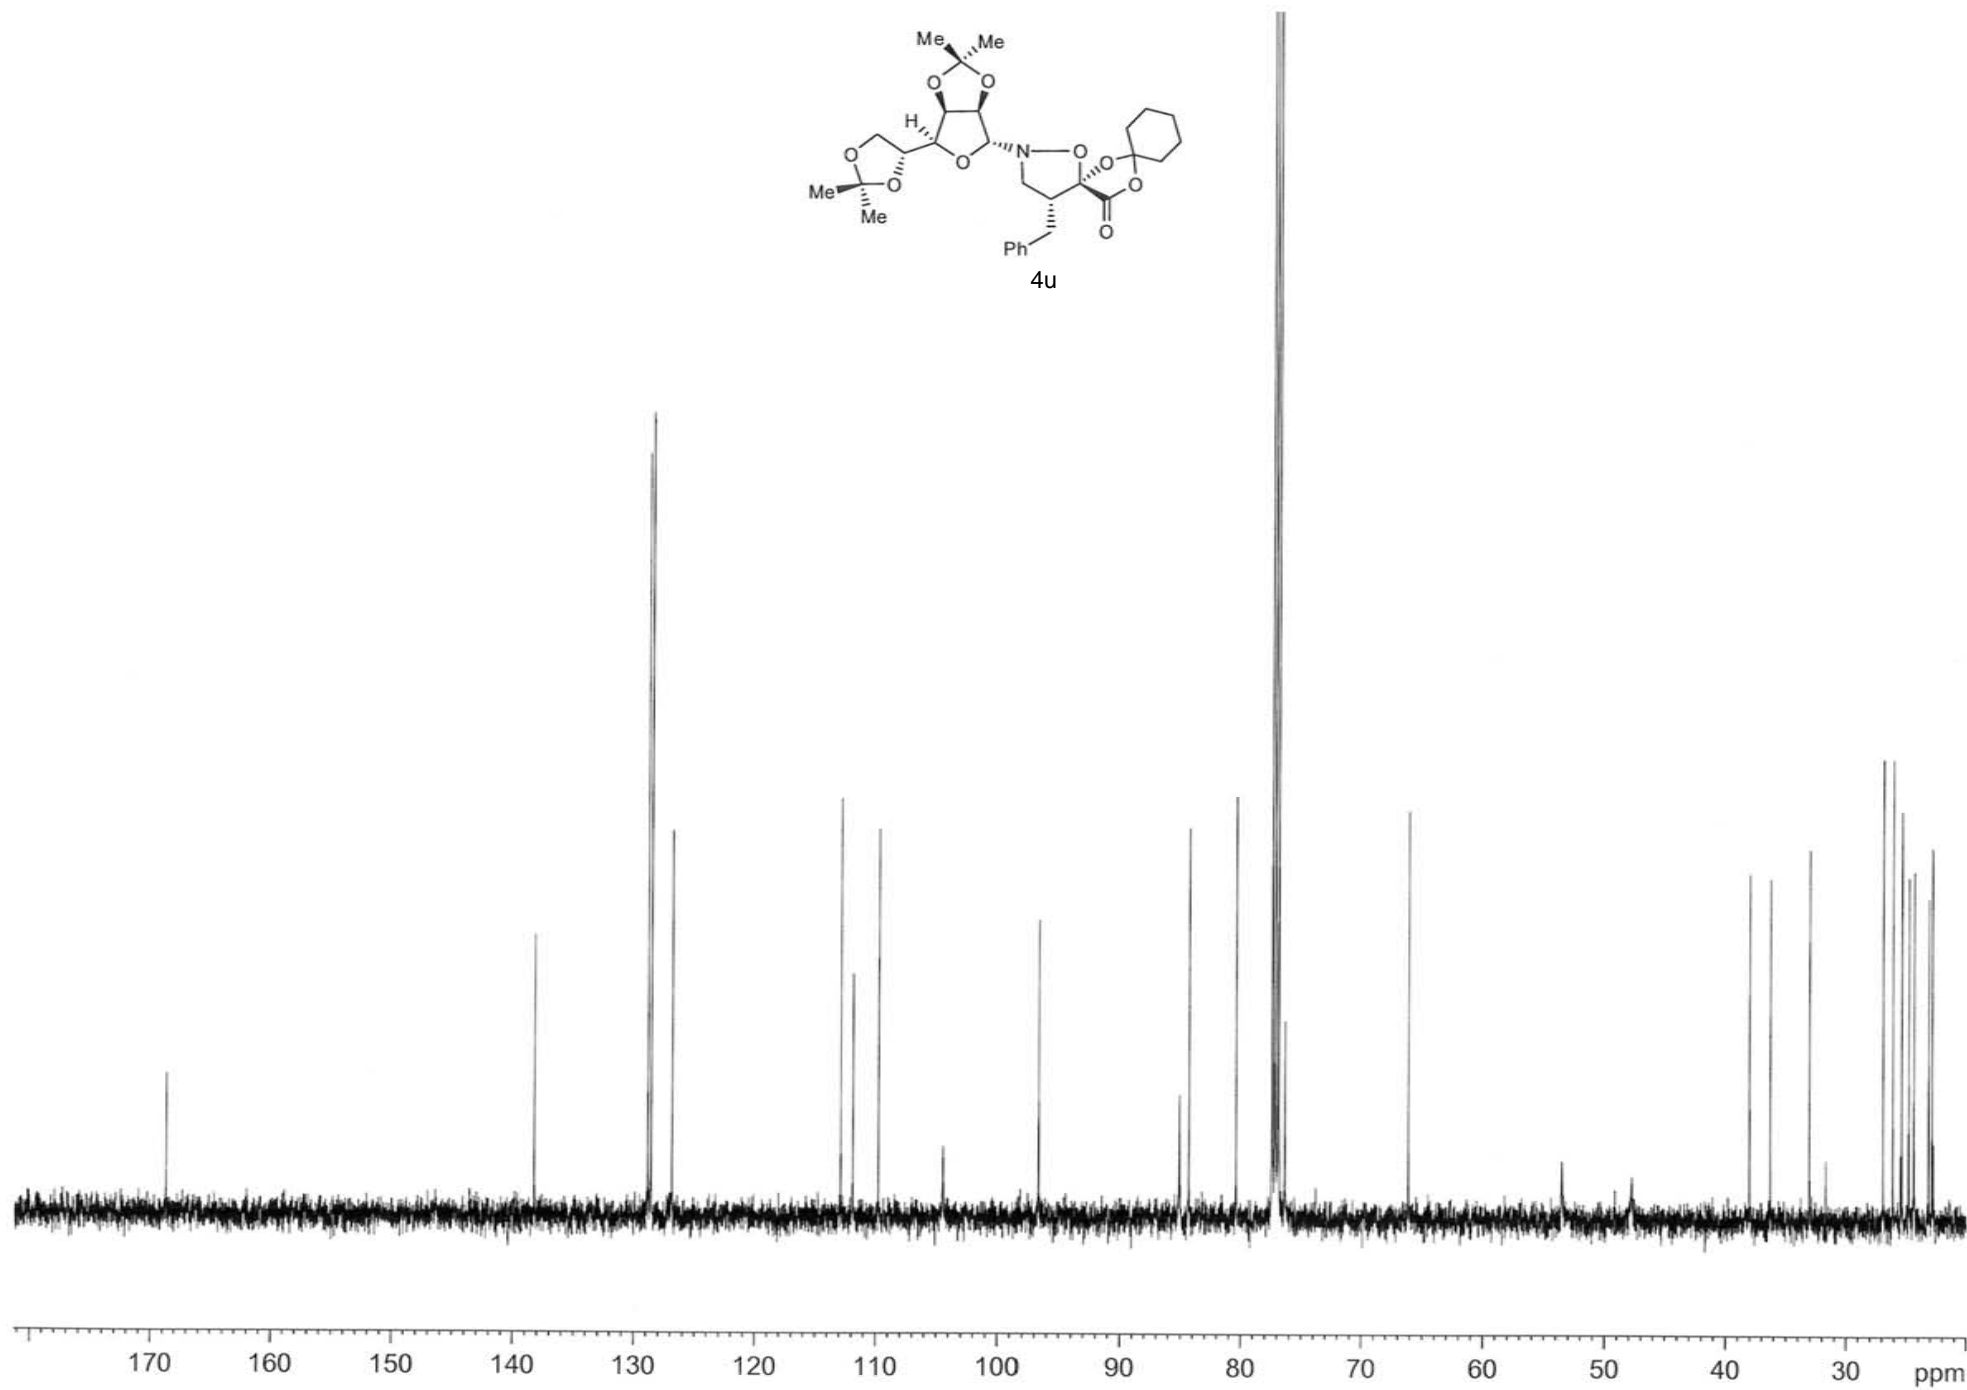

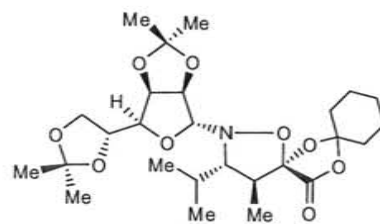

4v

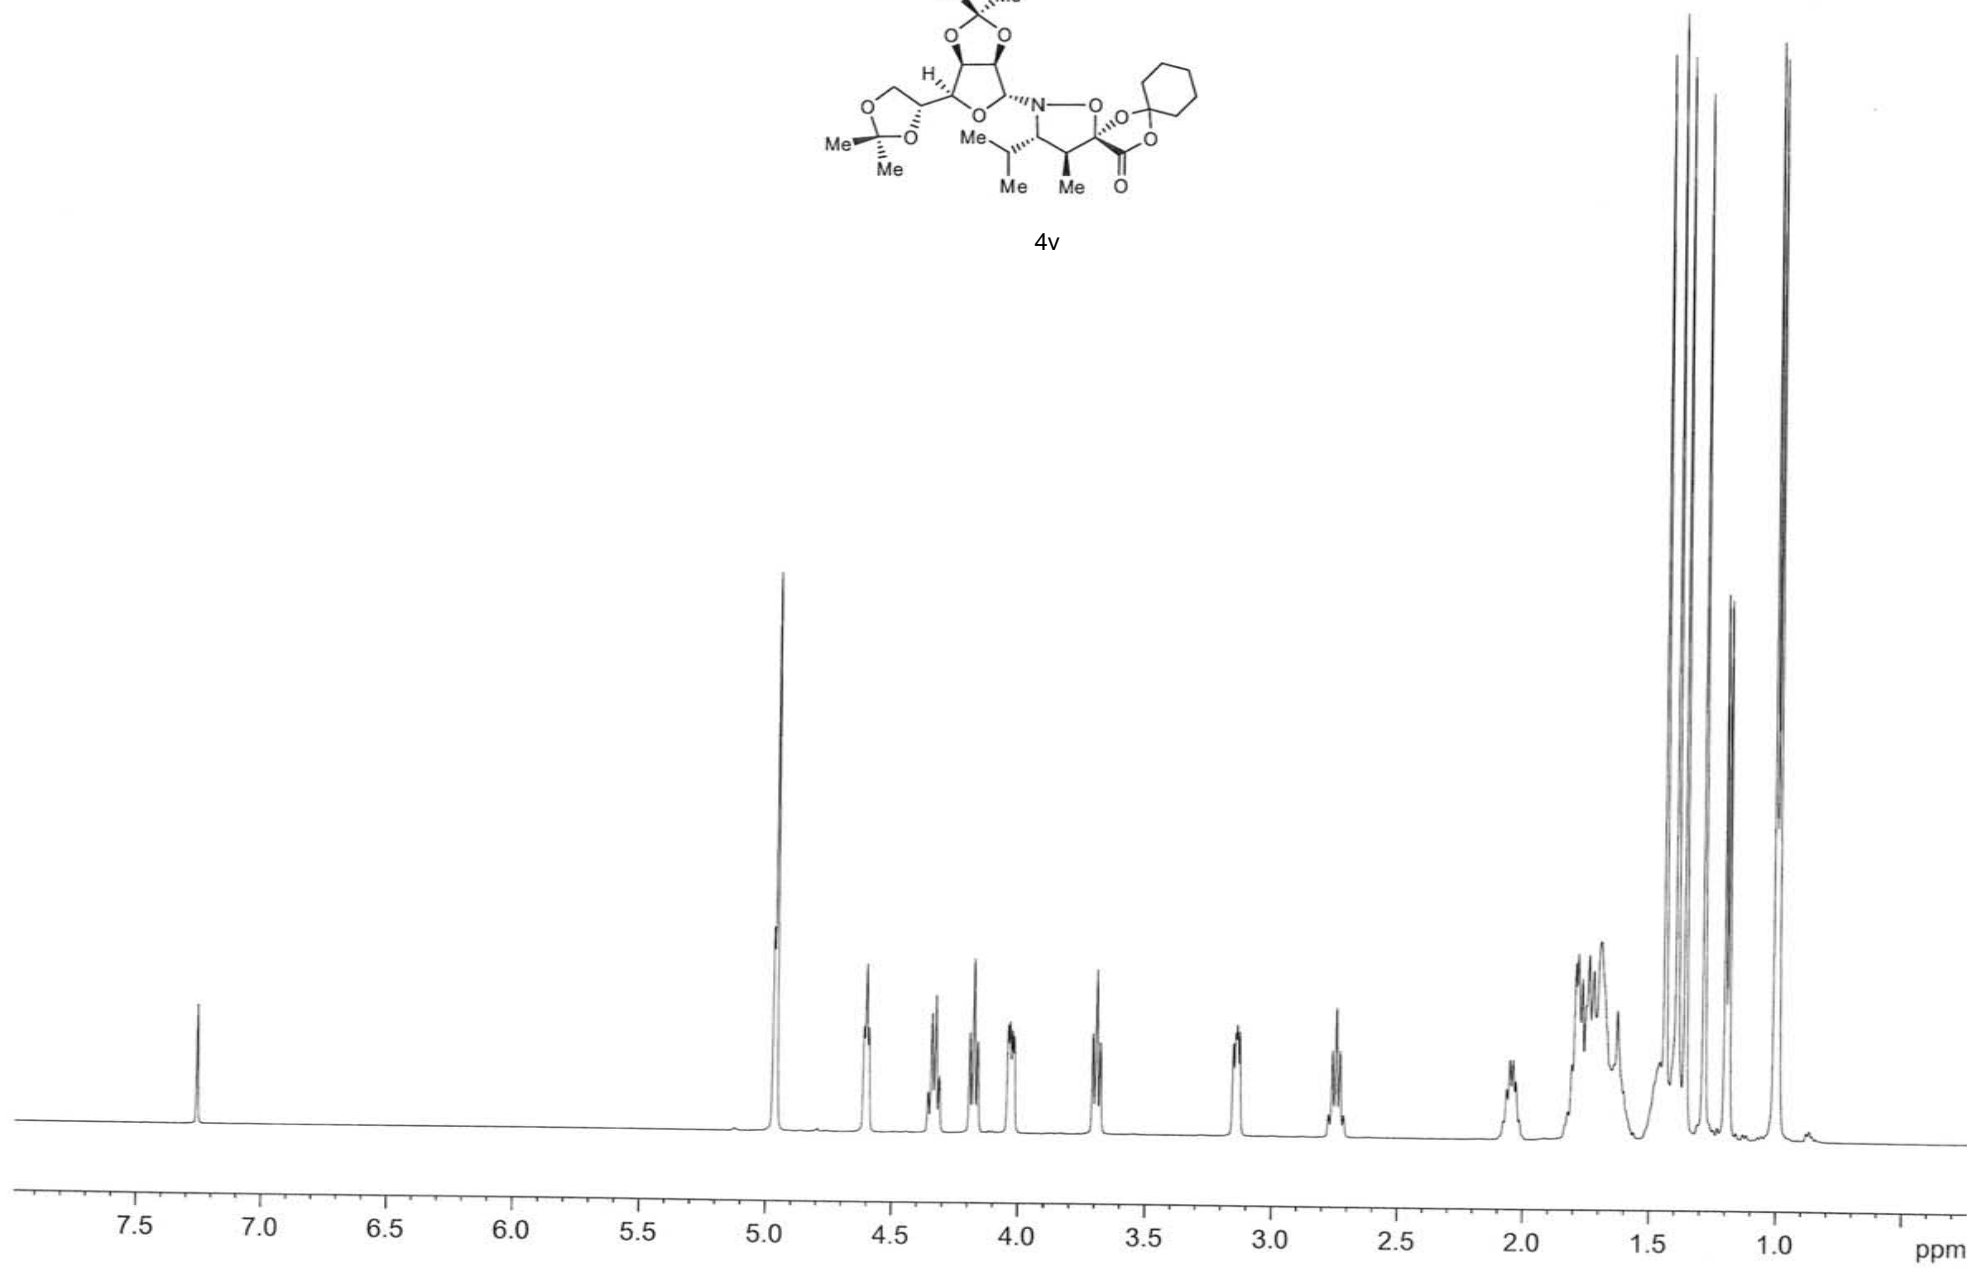

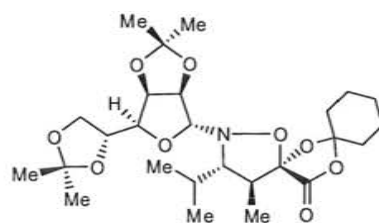

4v

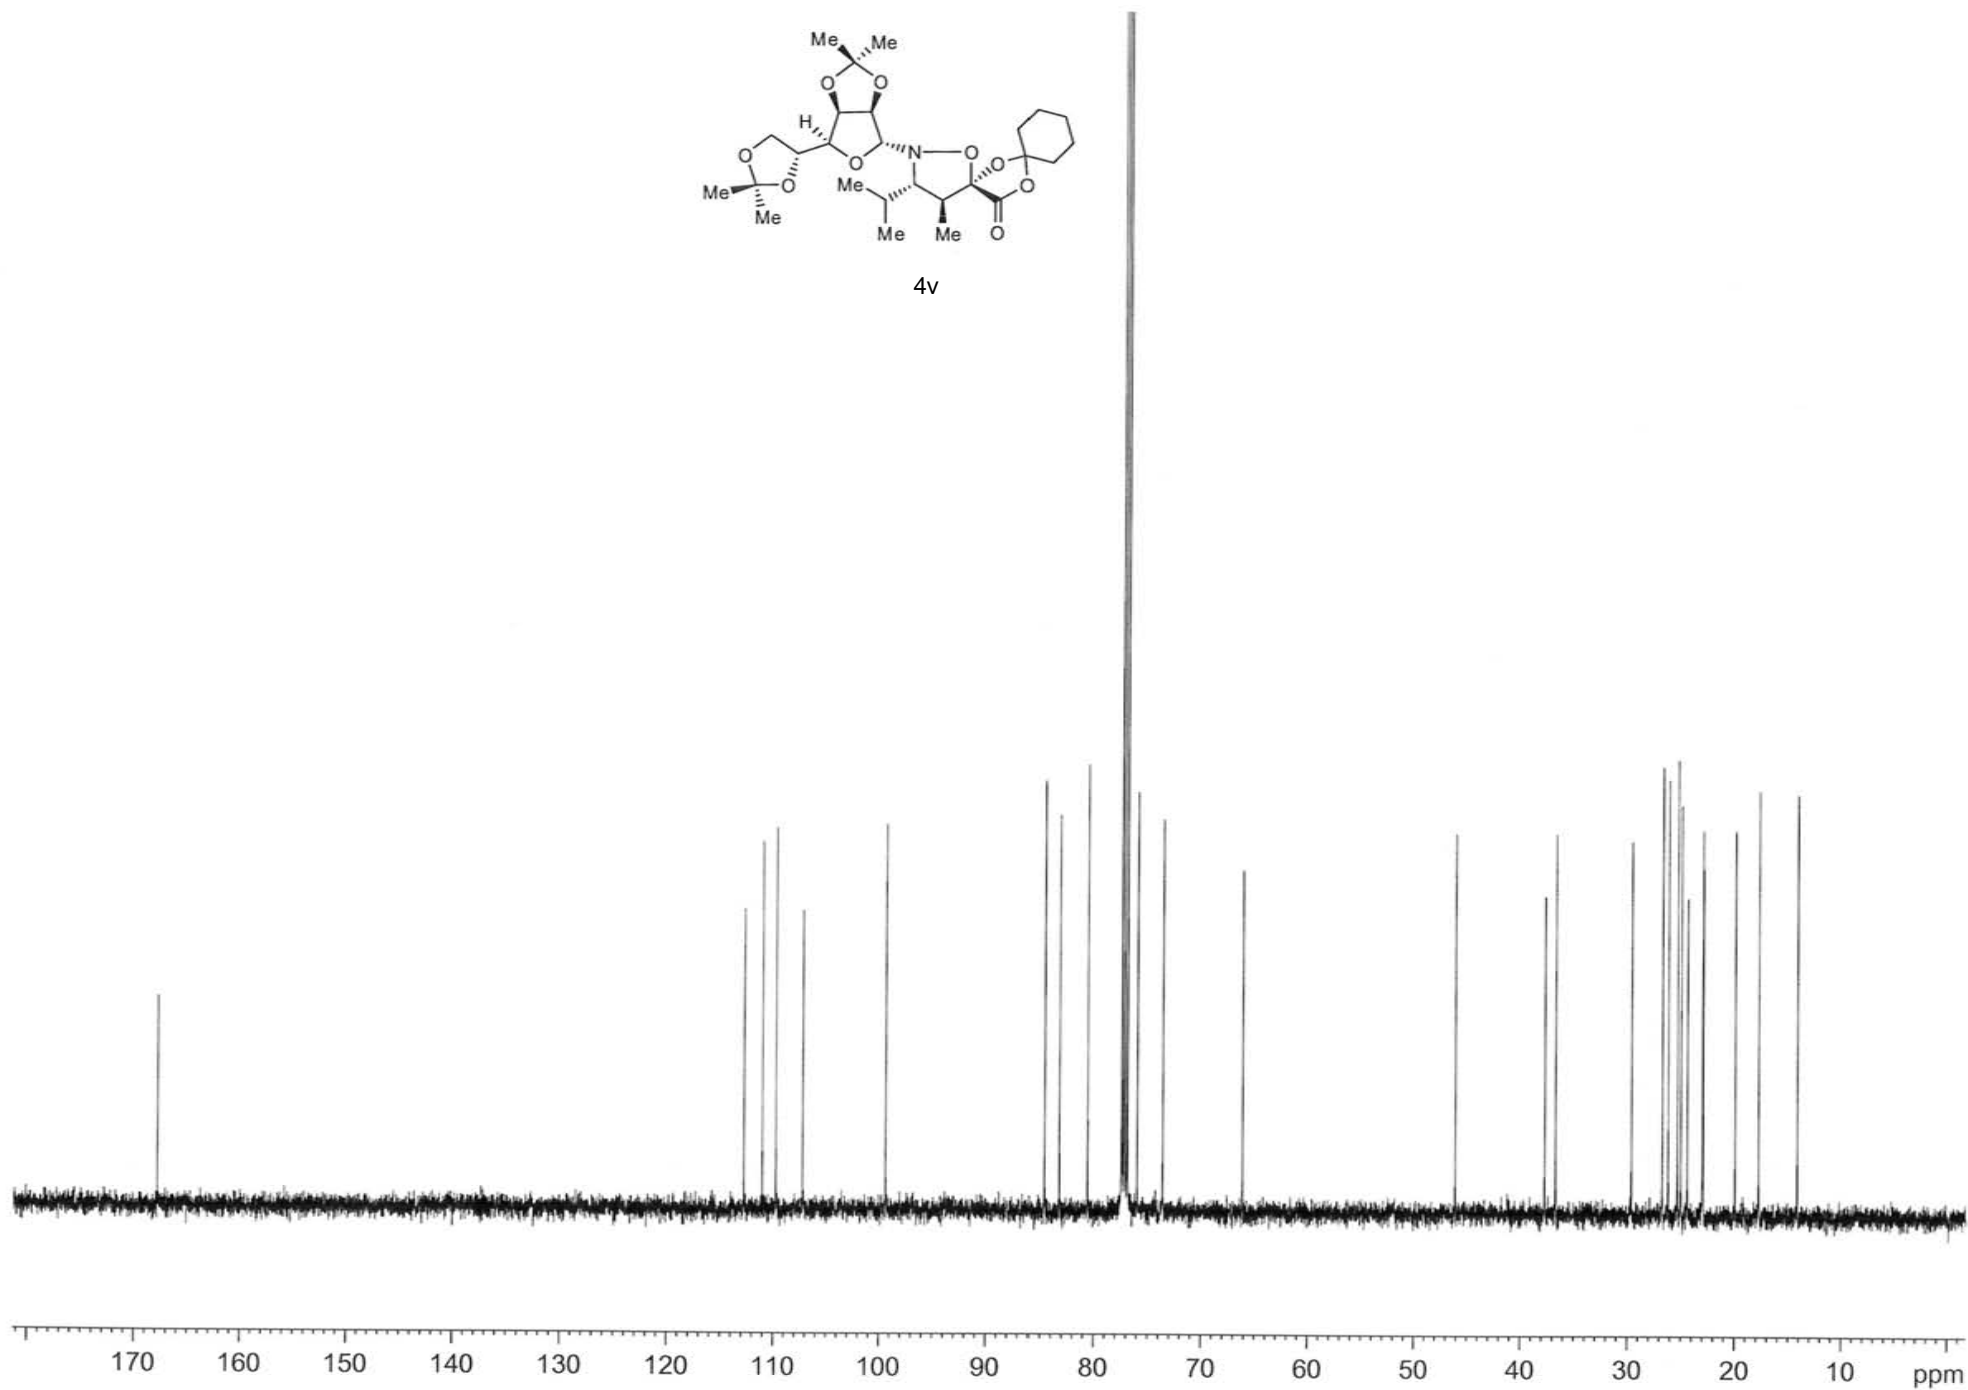

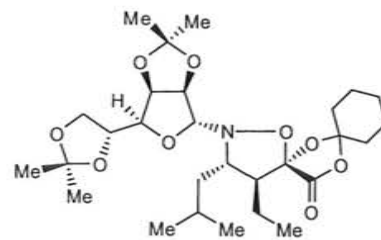

4w

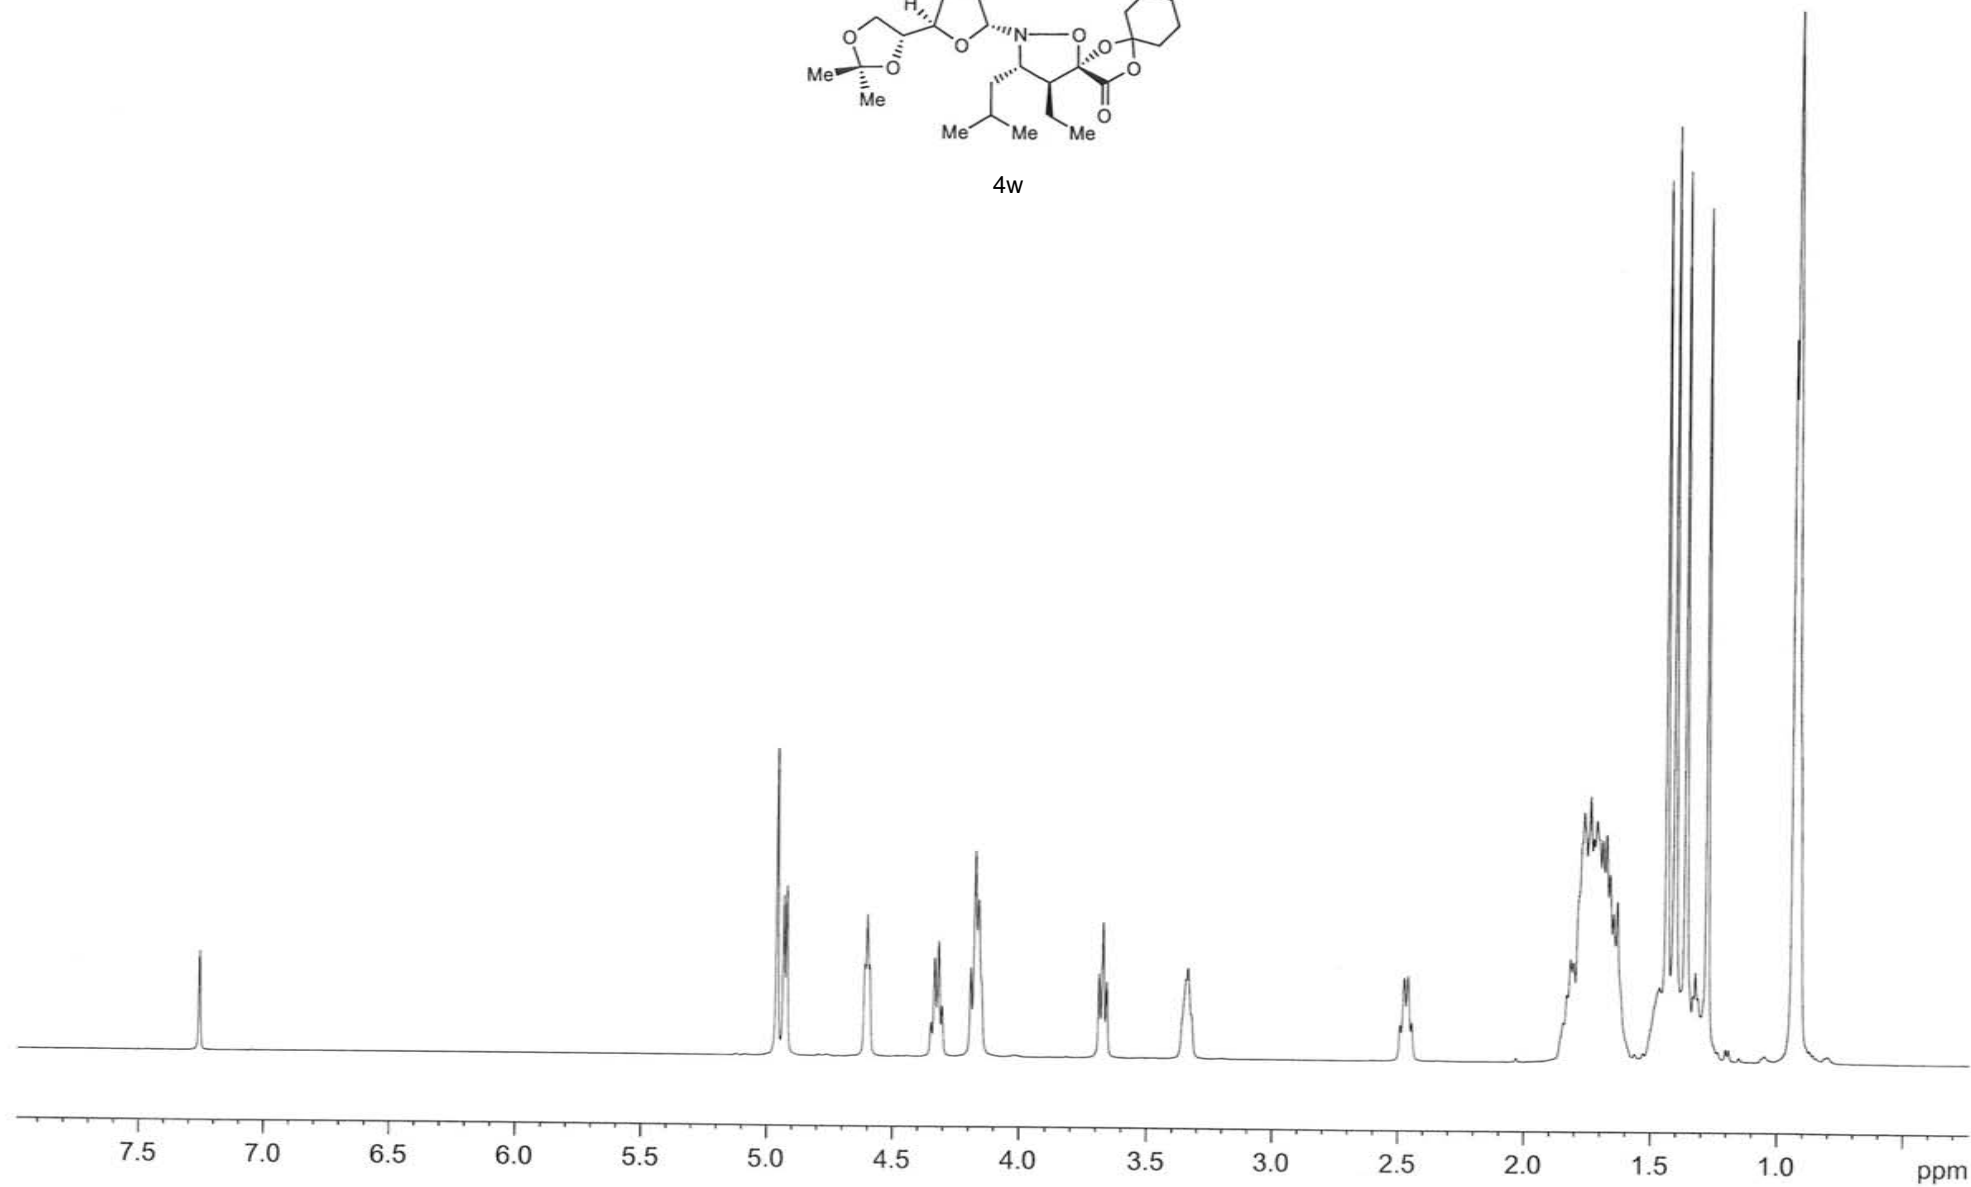

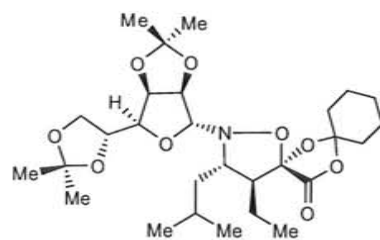

4w

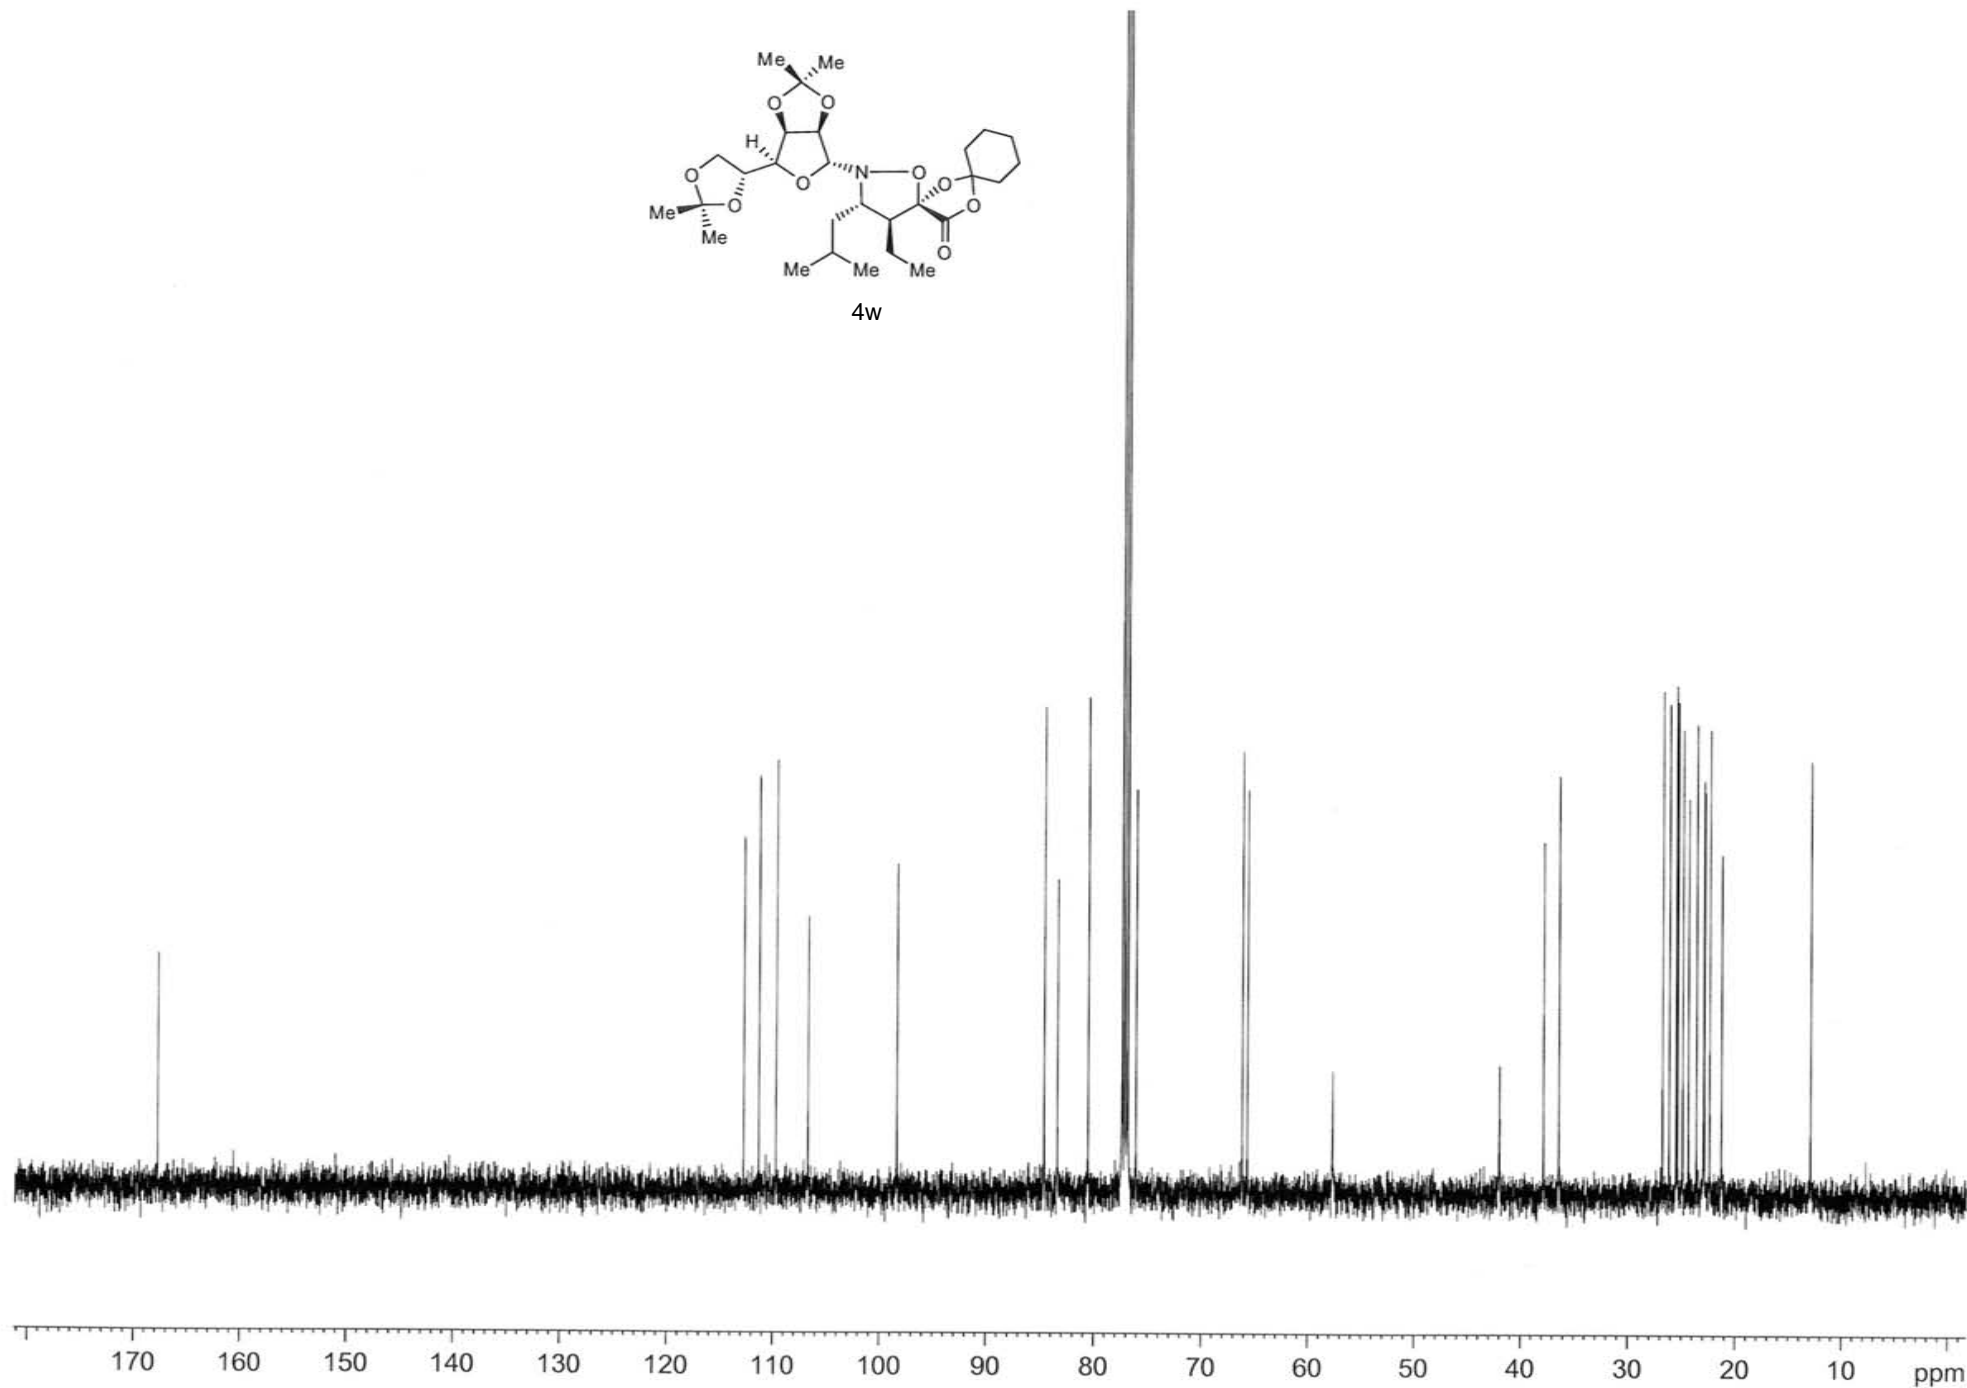

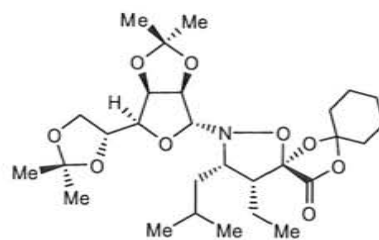

4x

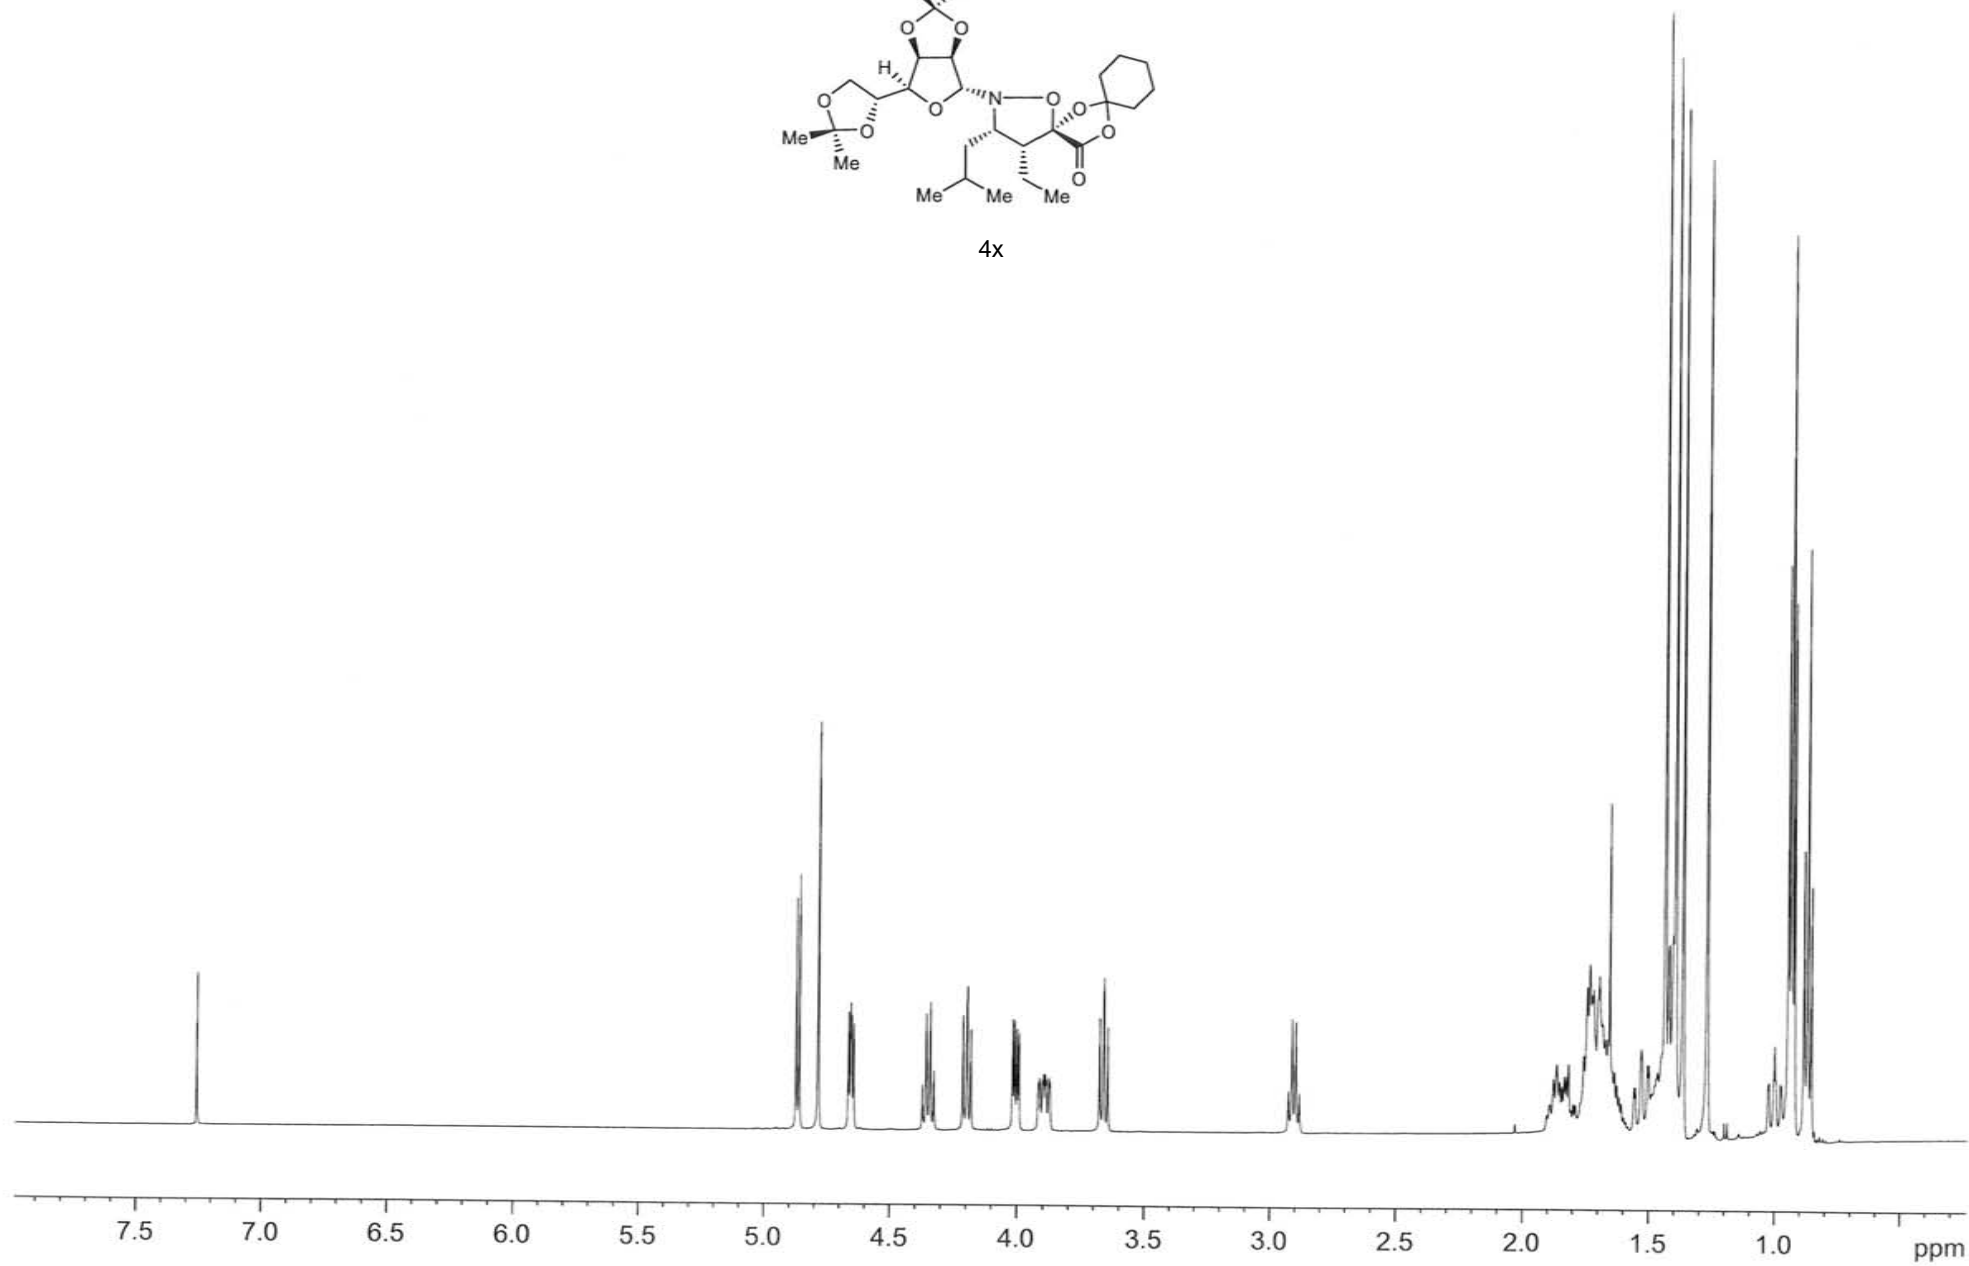

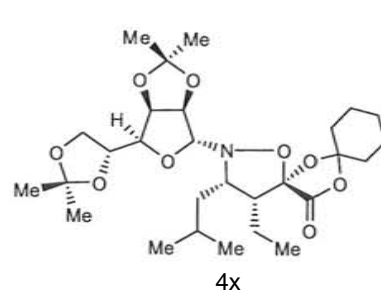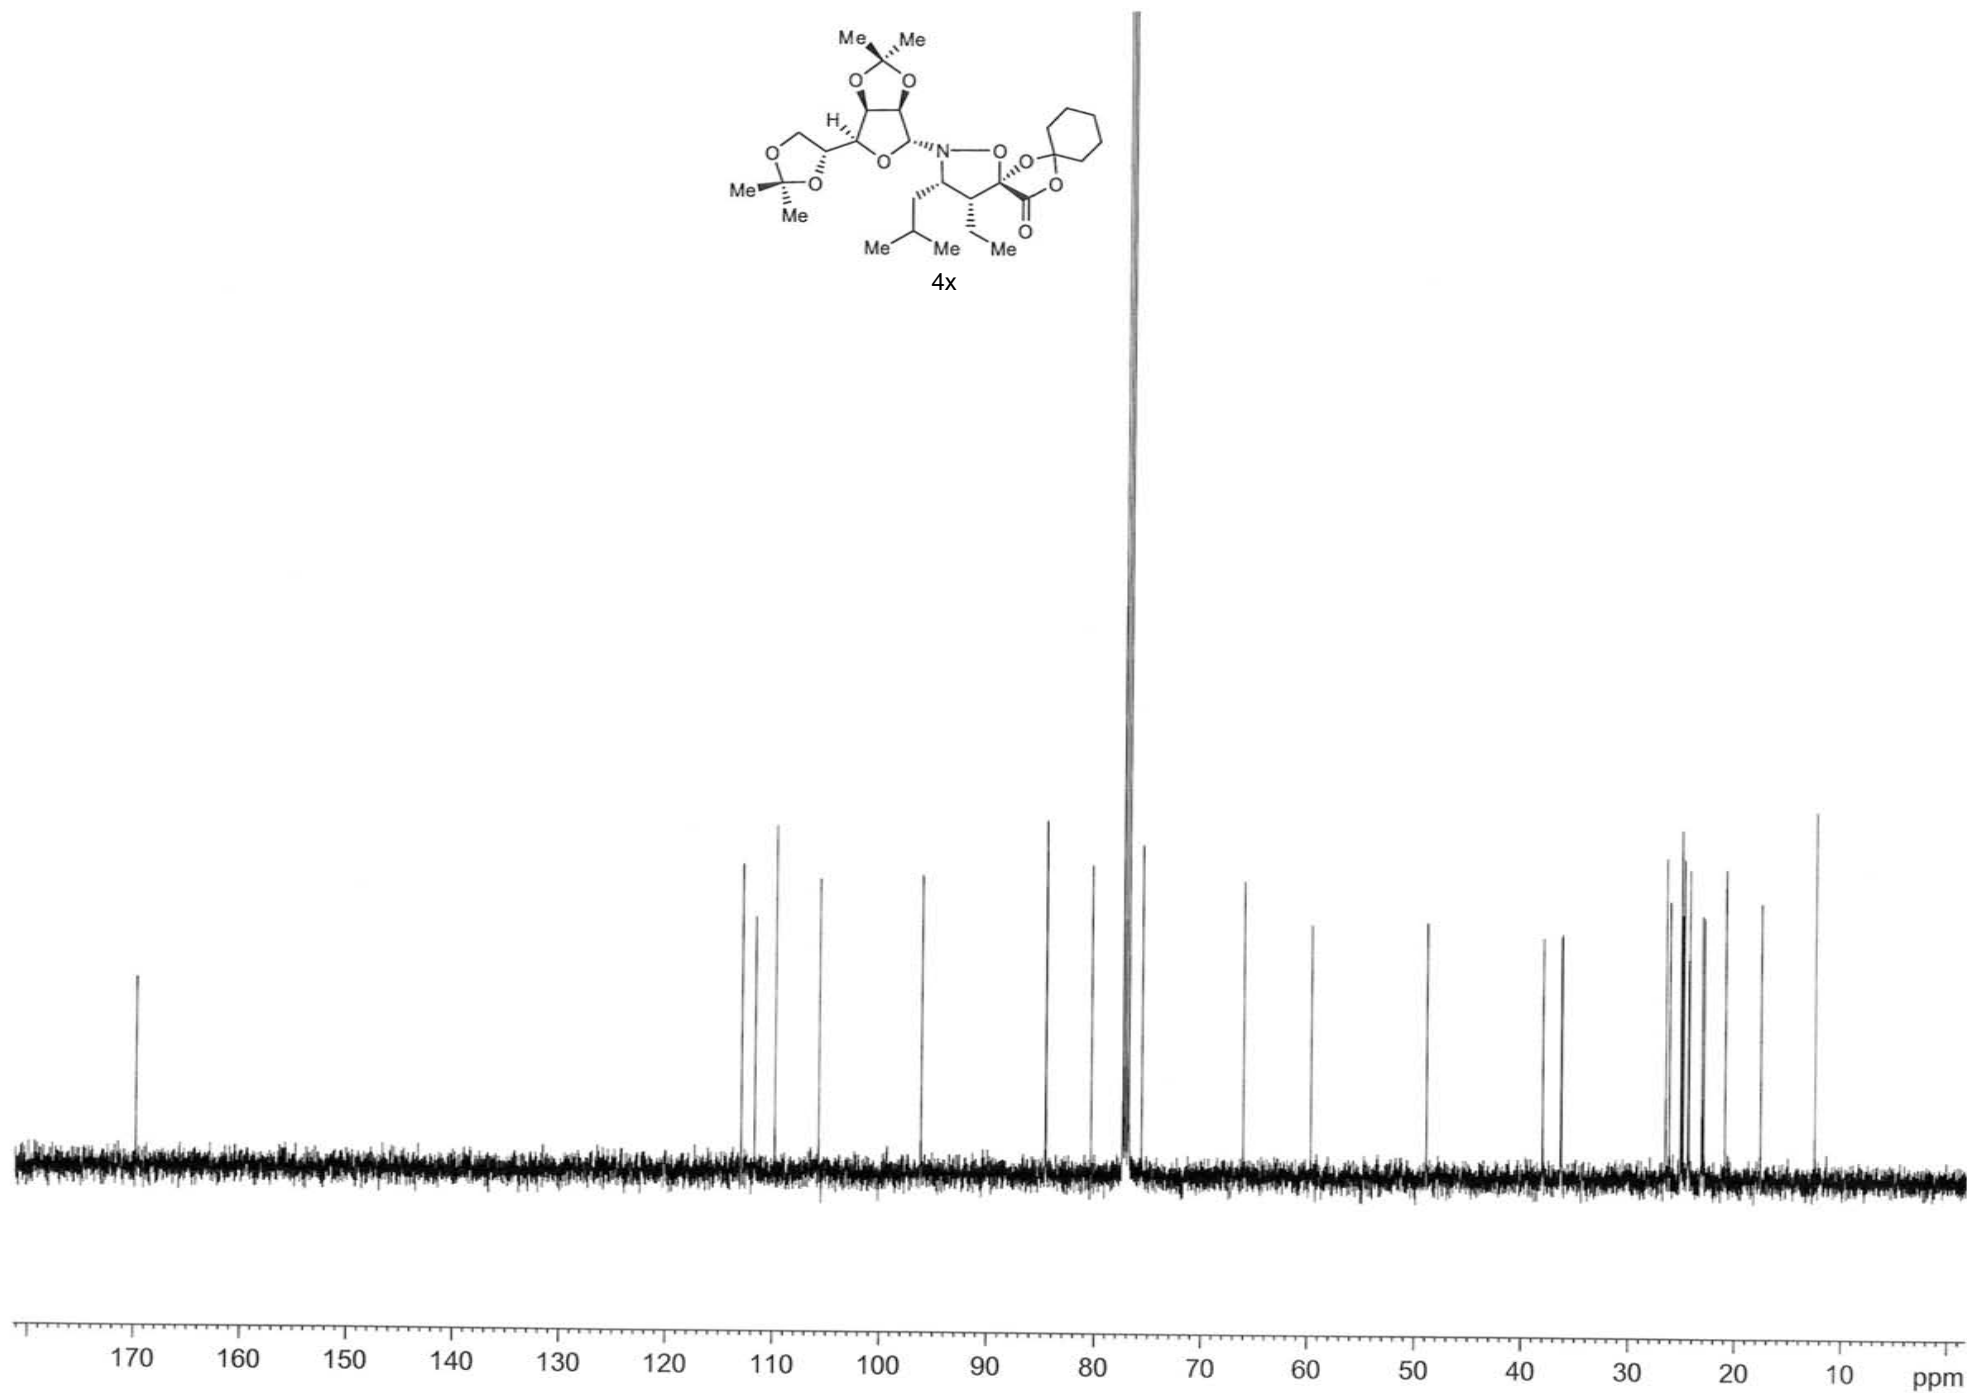



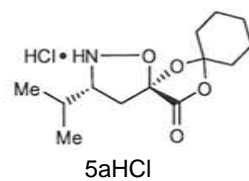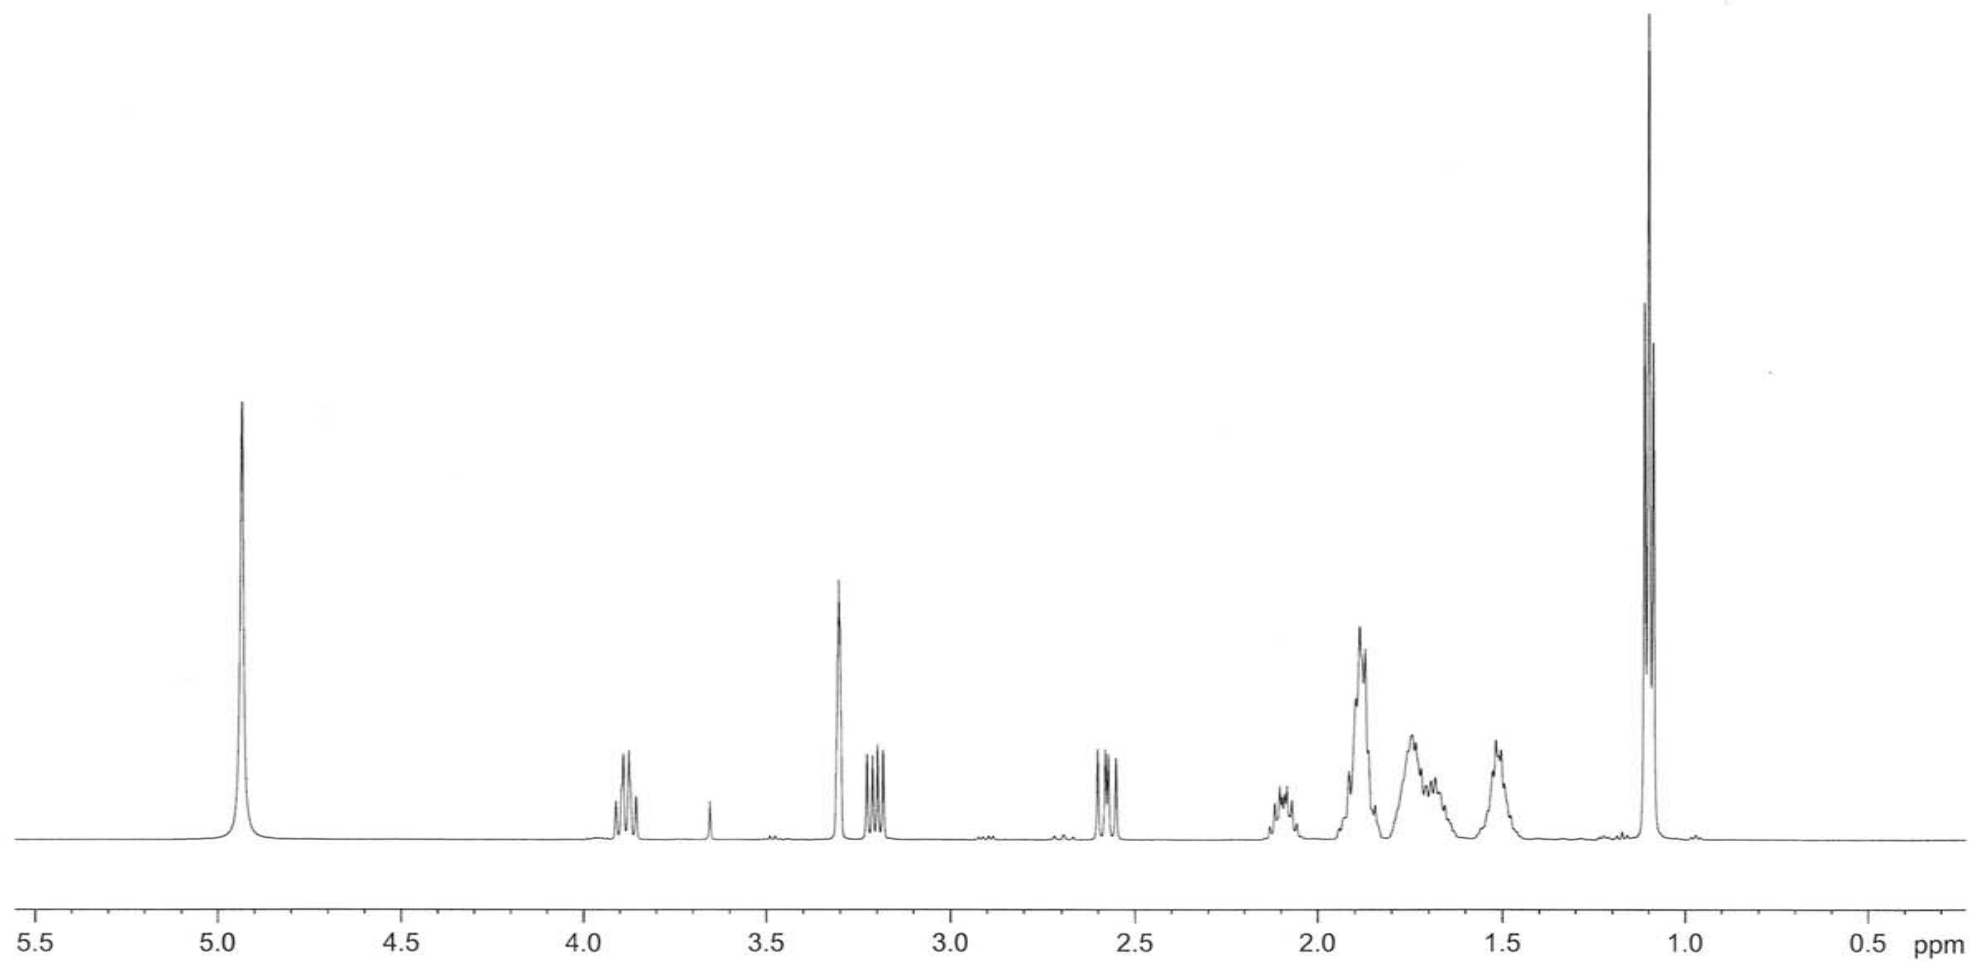

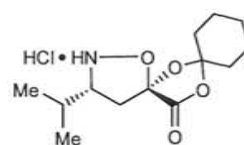

5aHCl

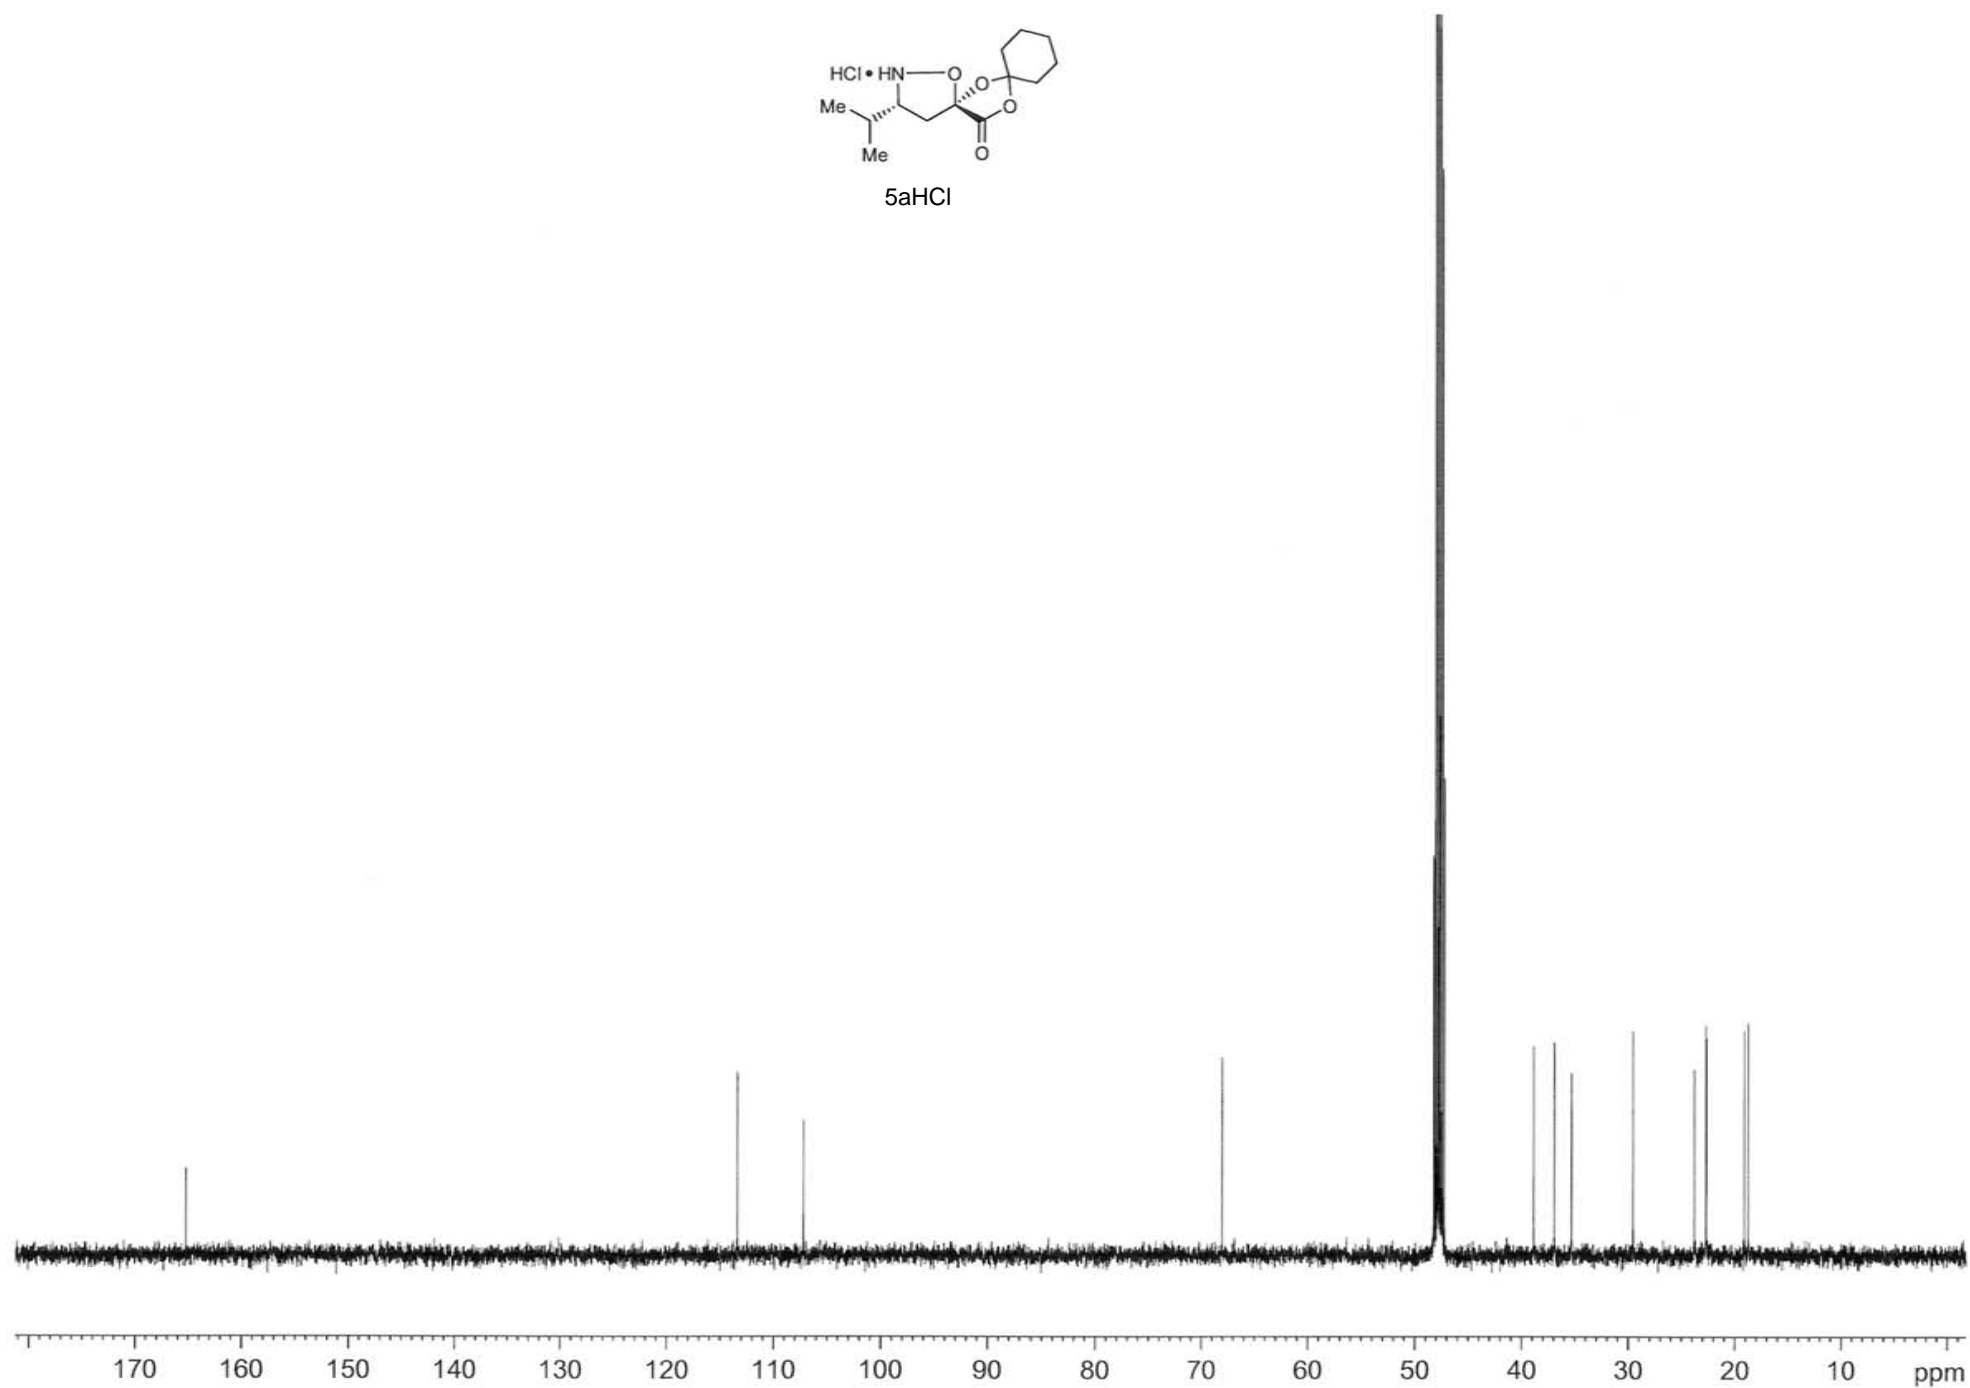

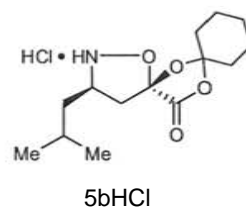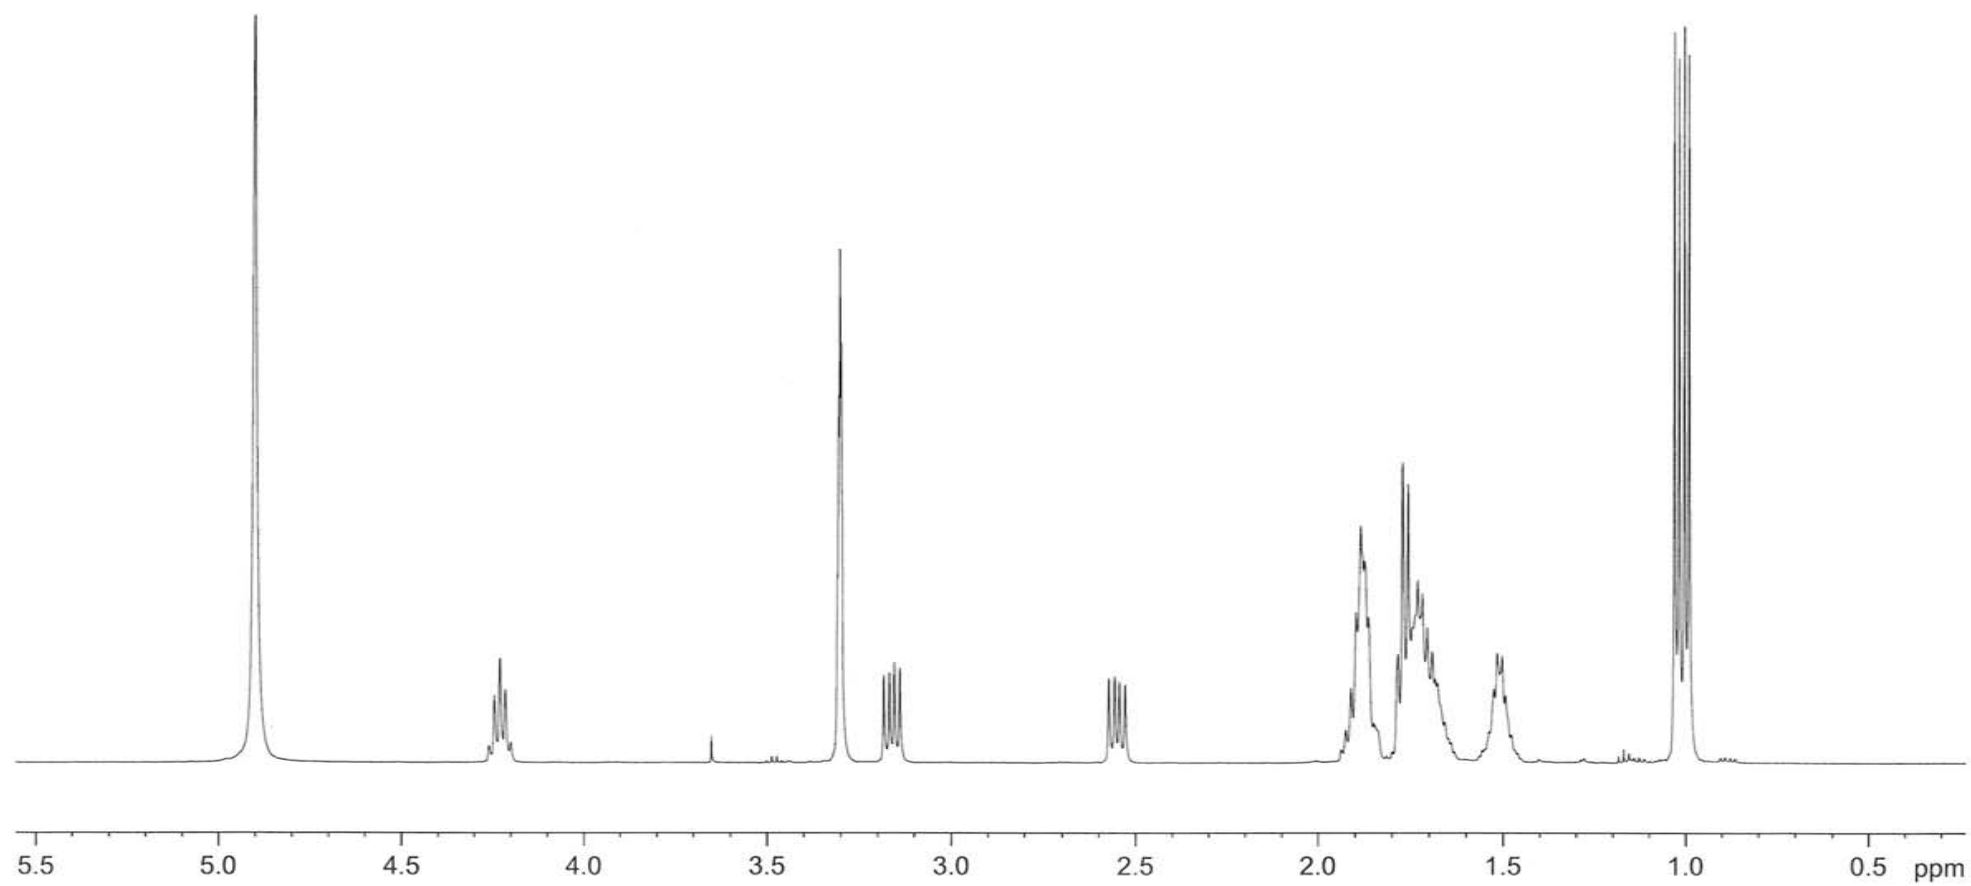

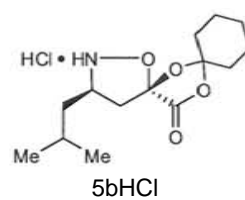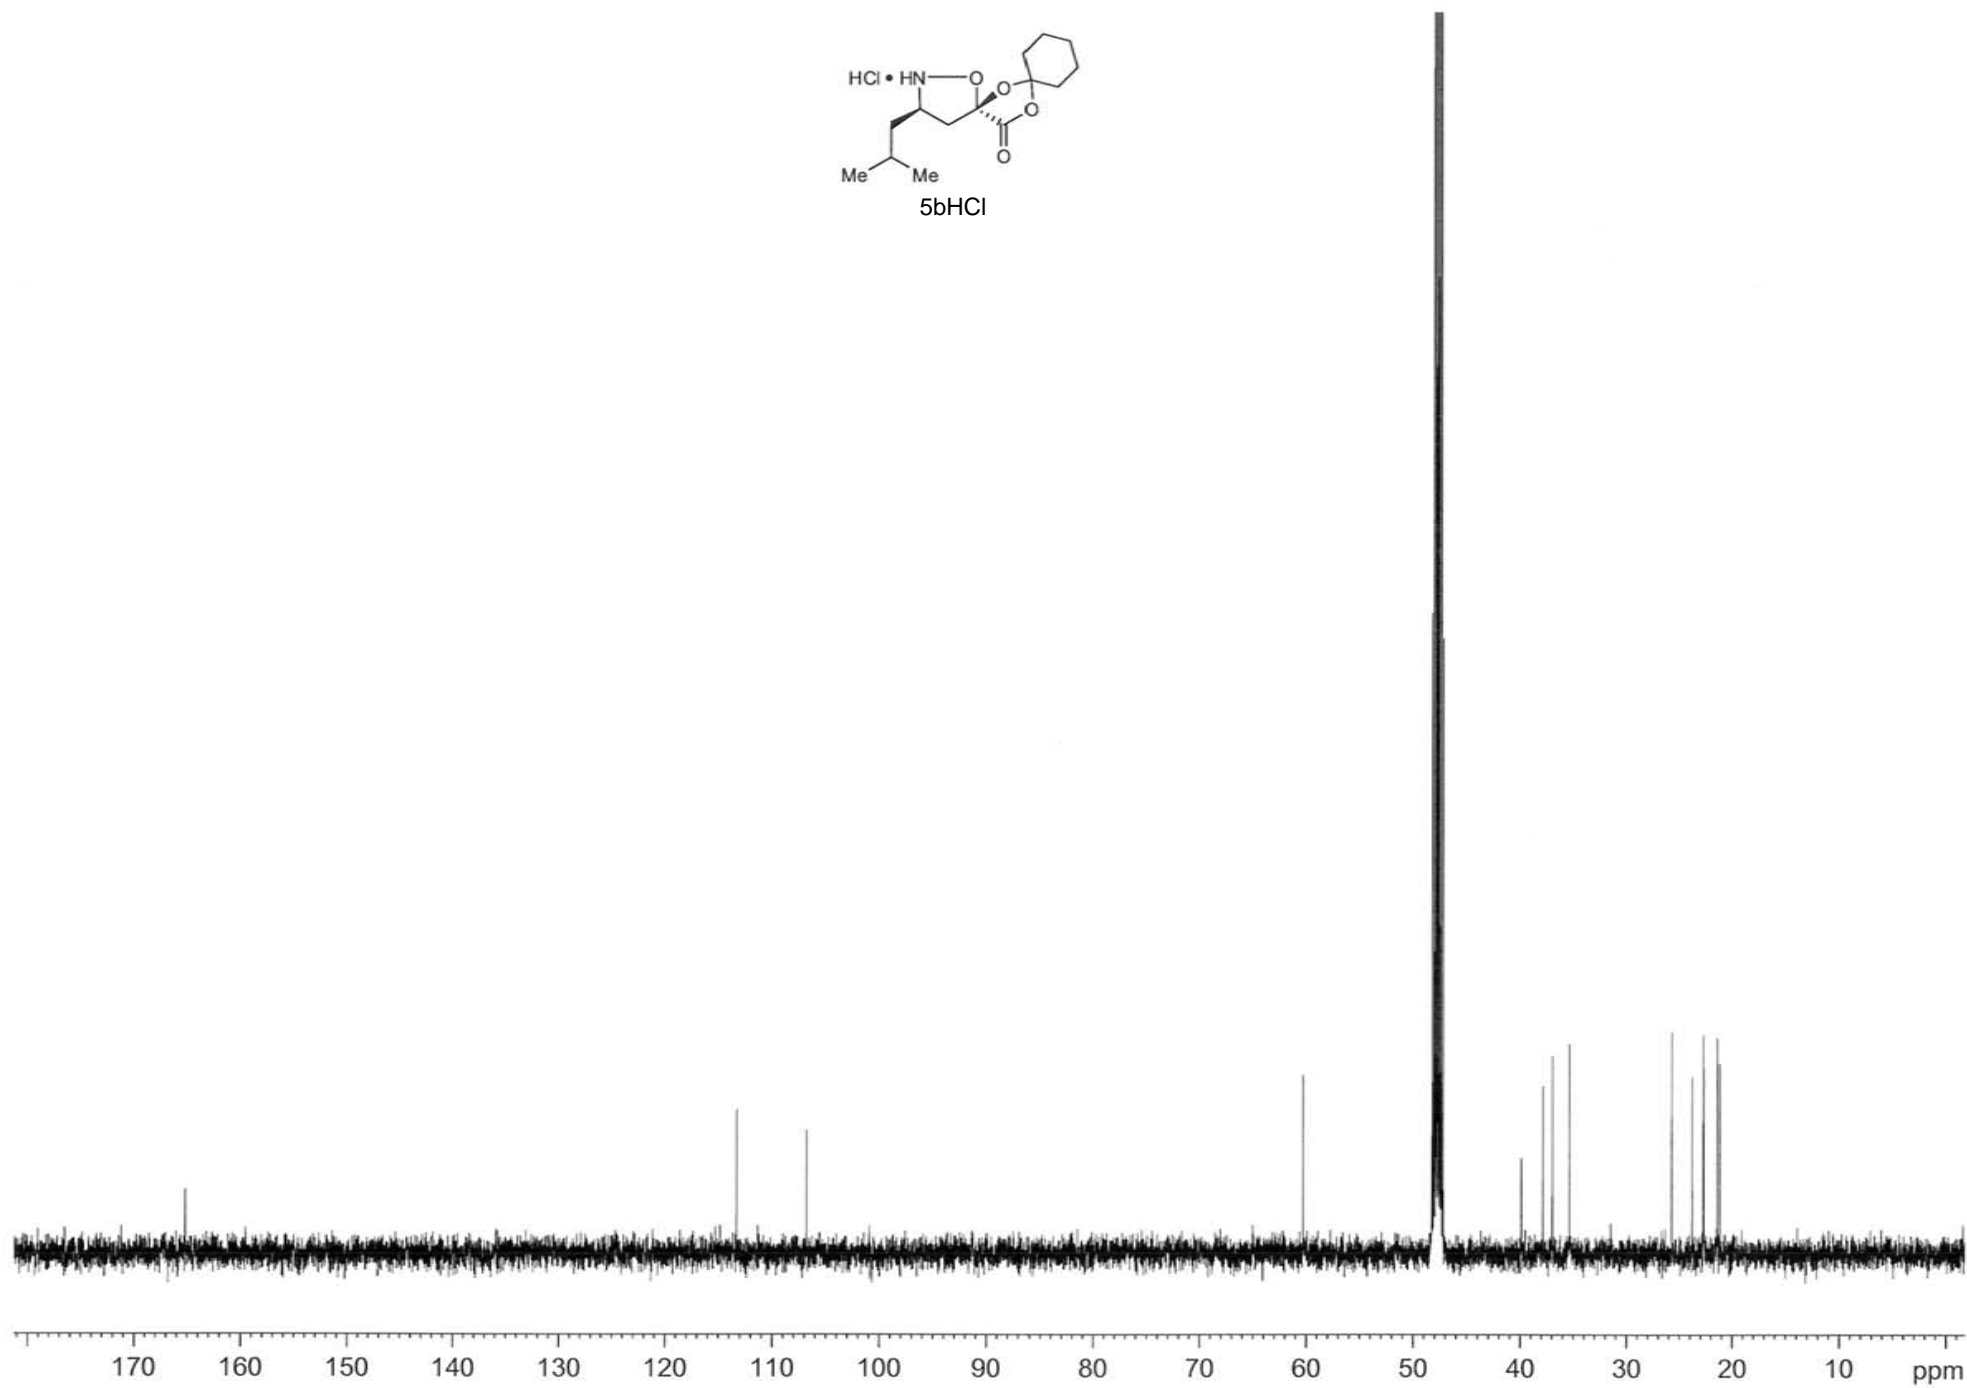

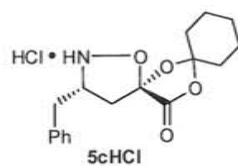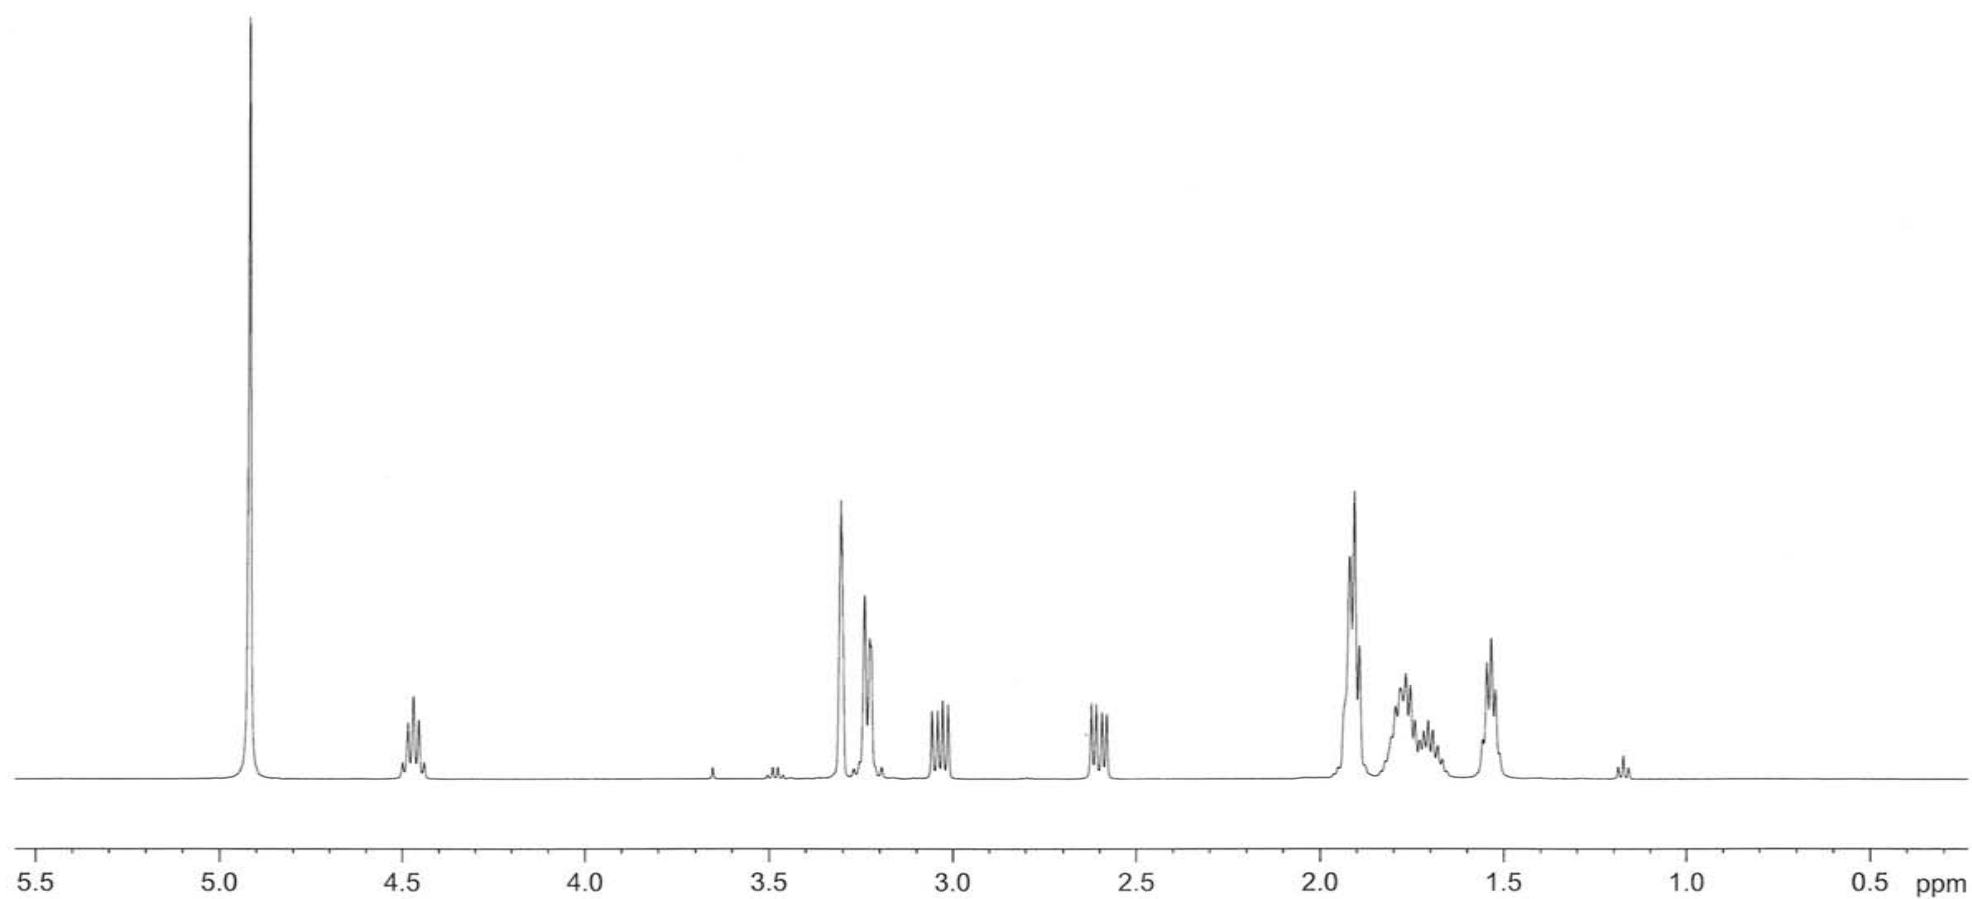

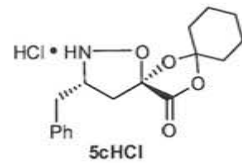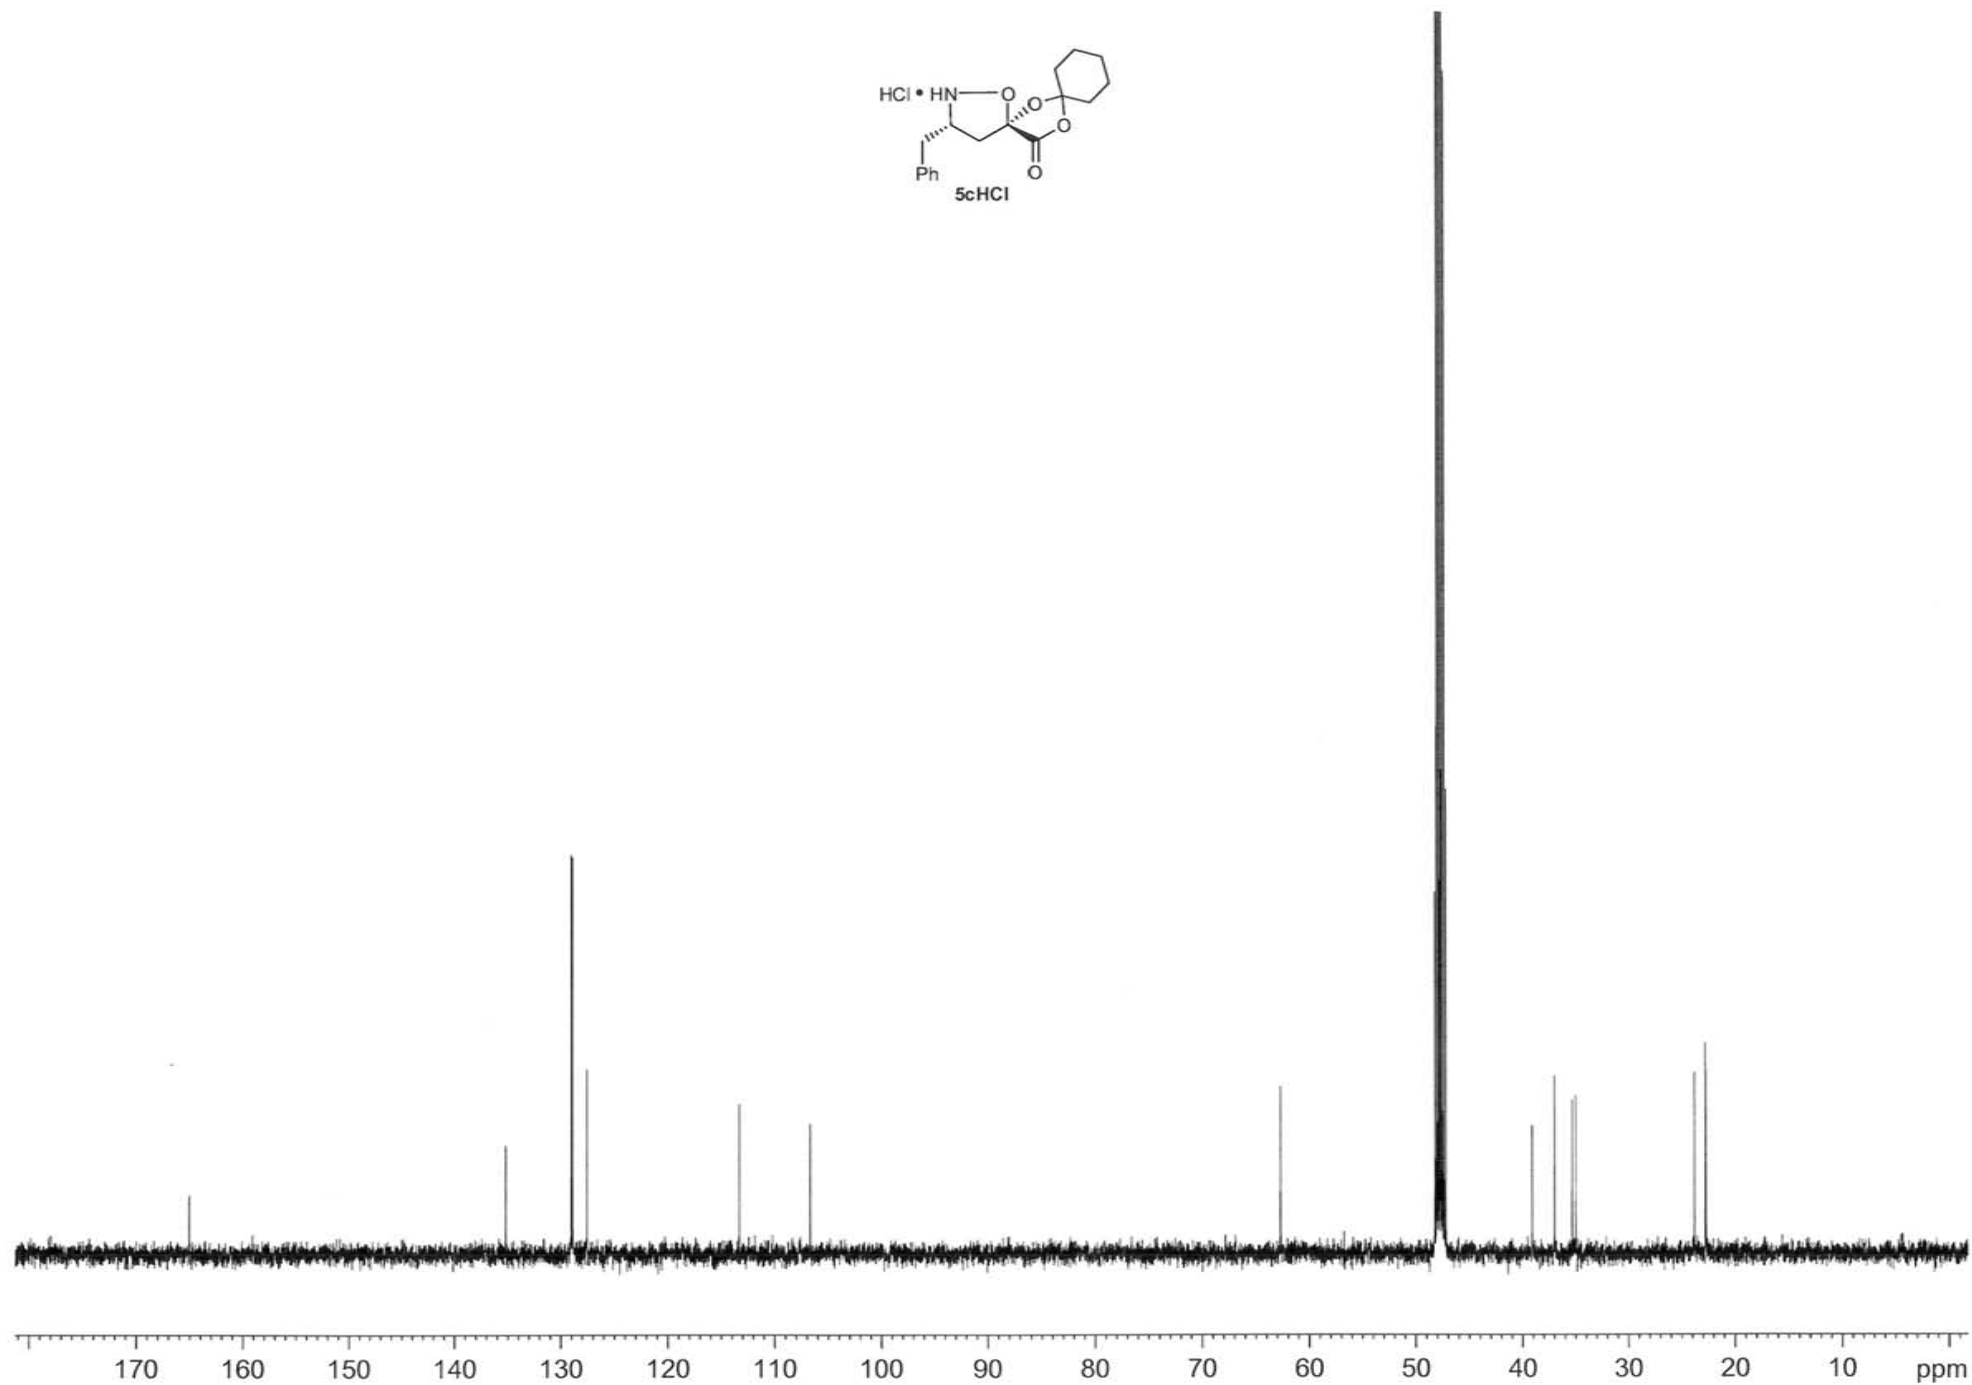

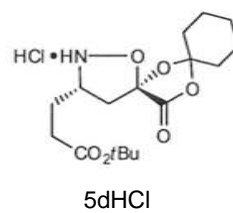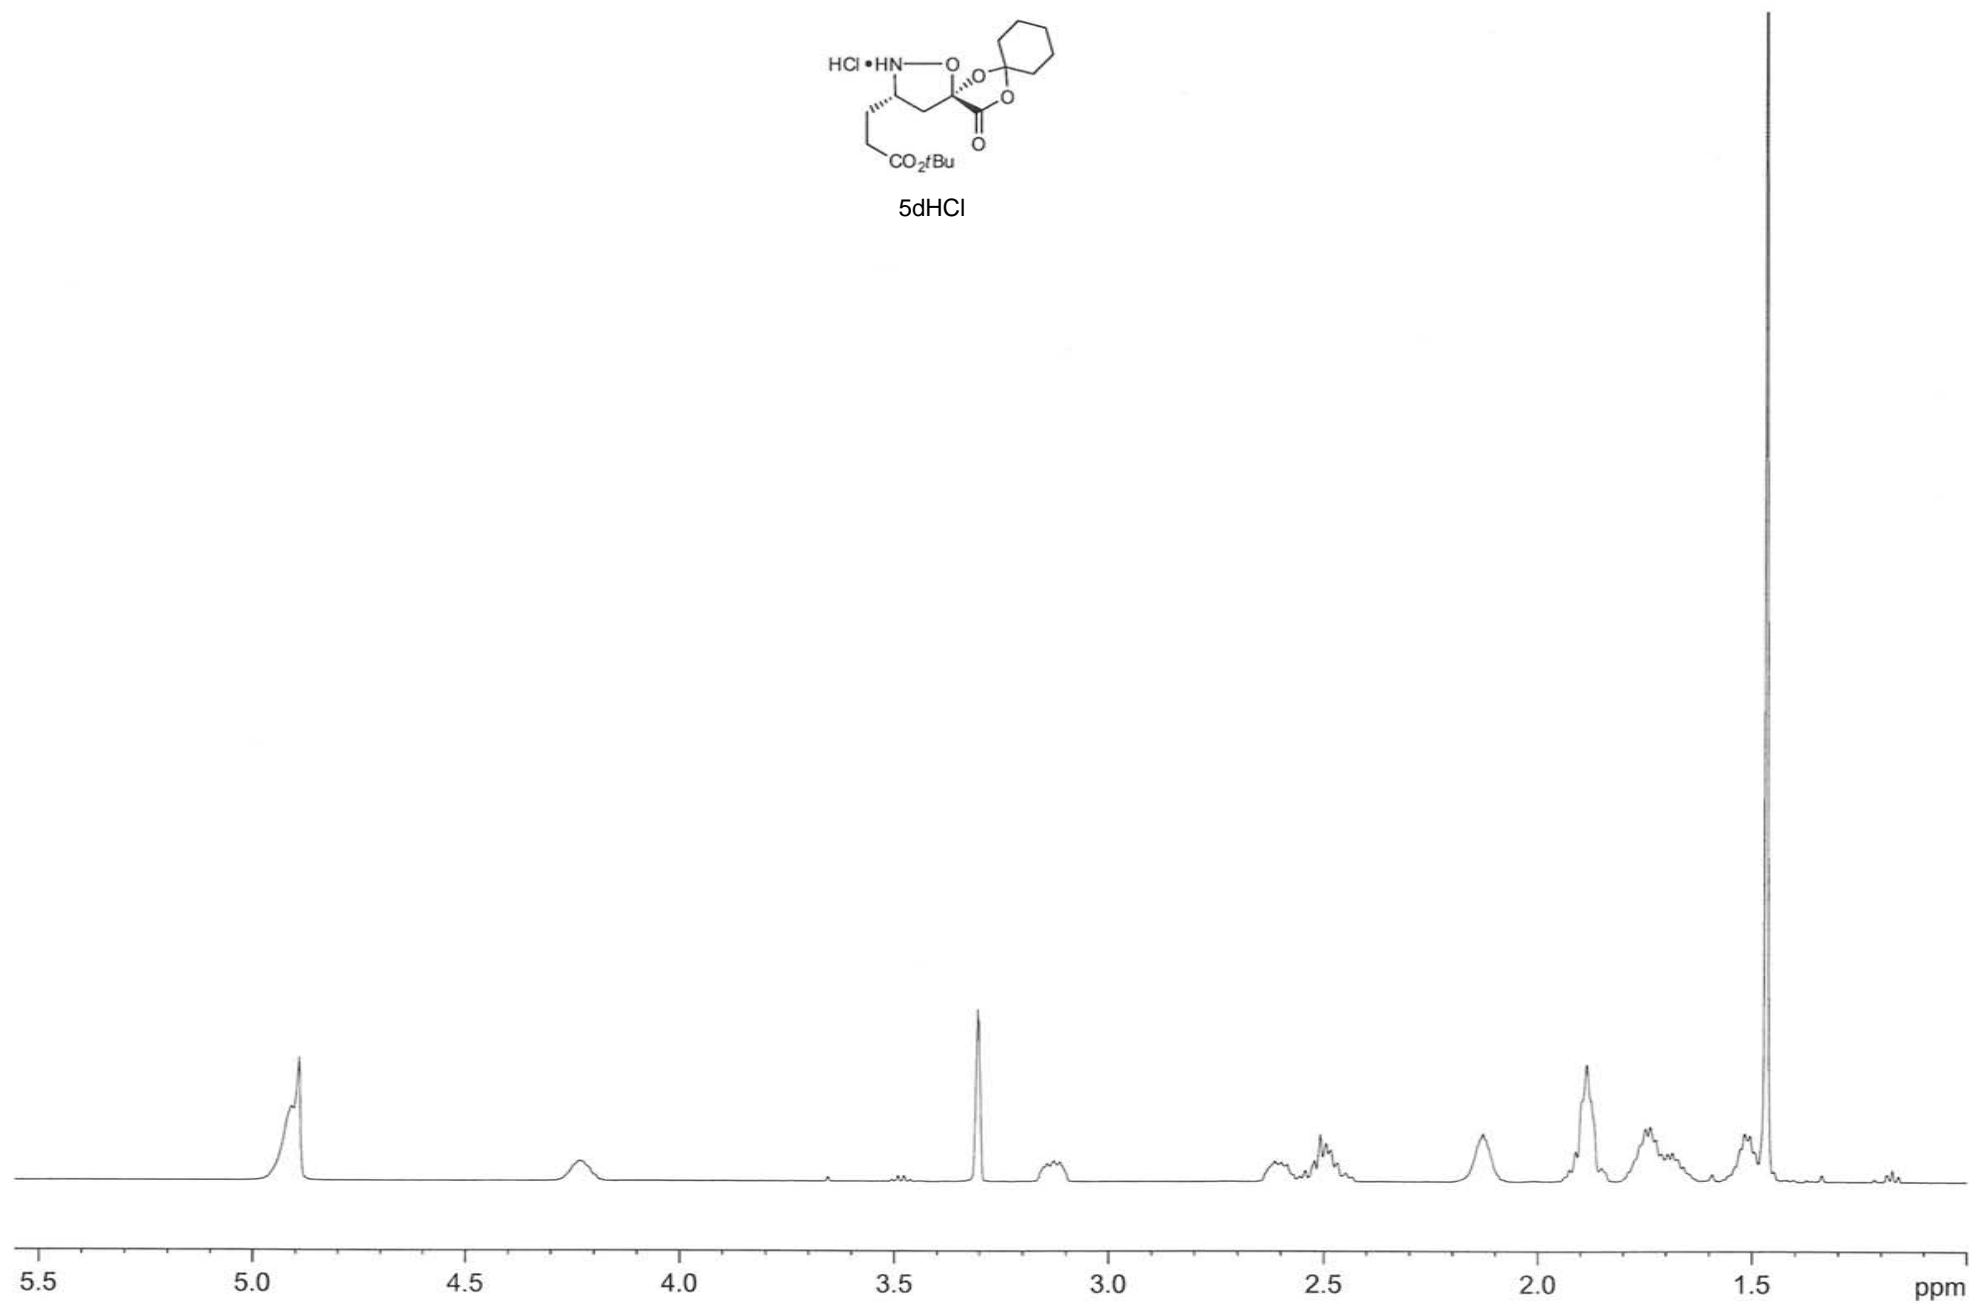

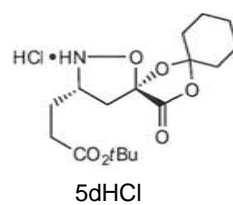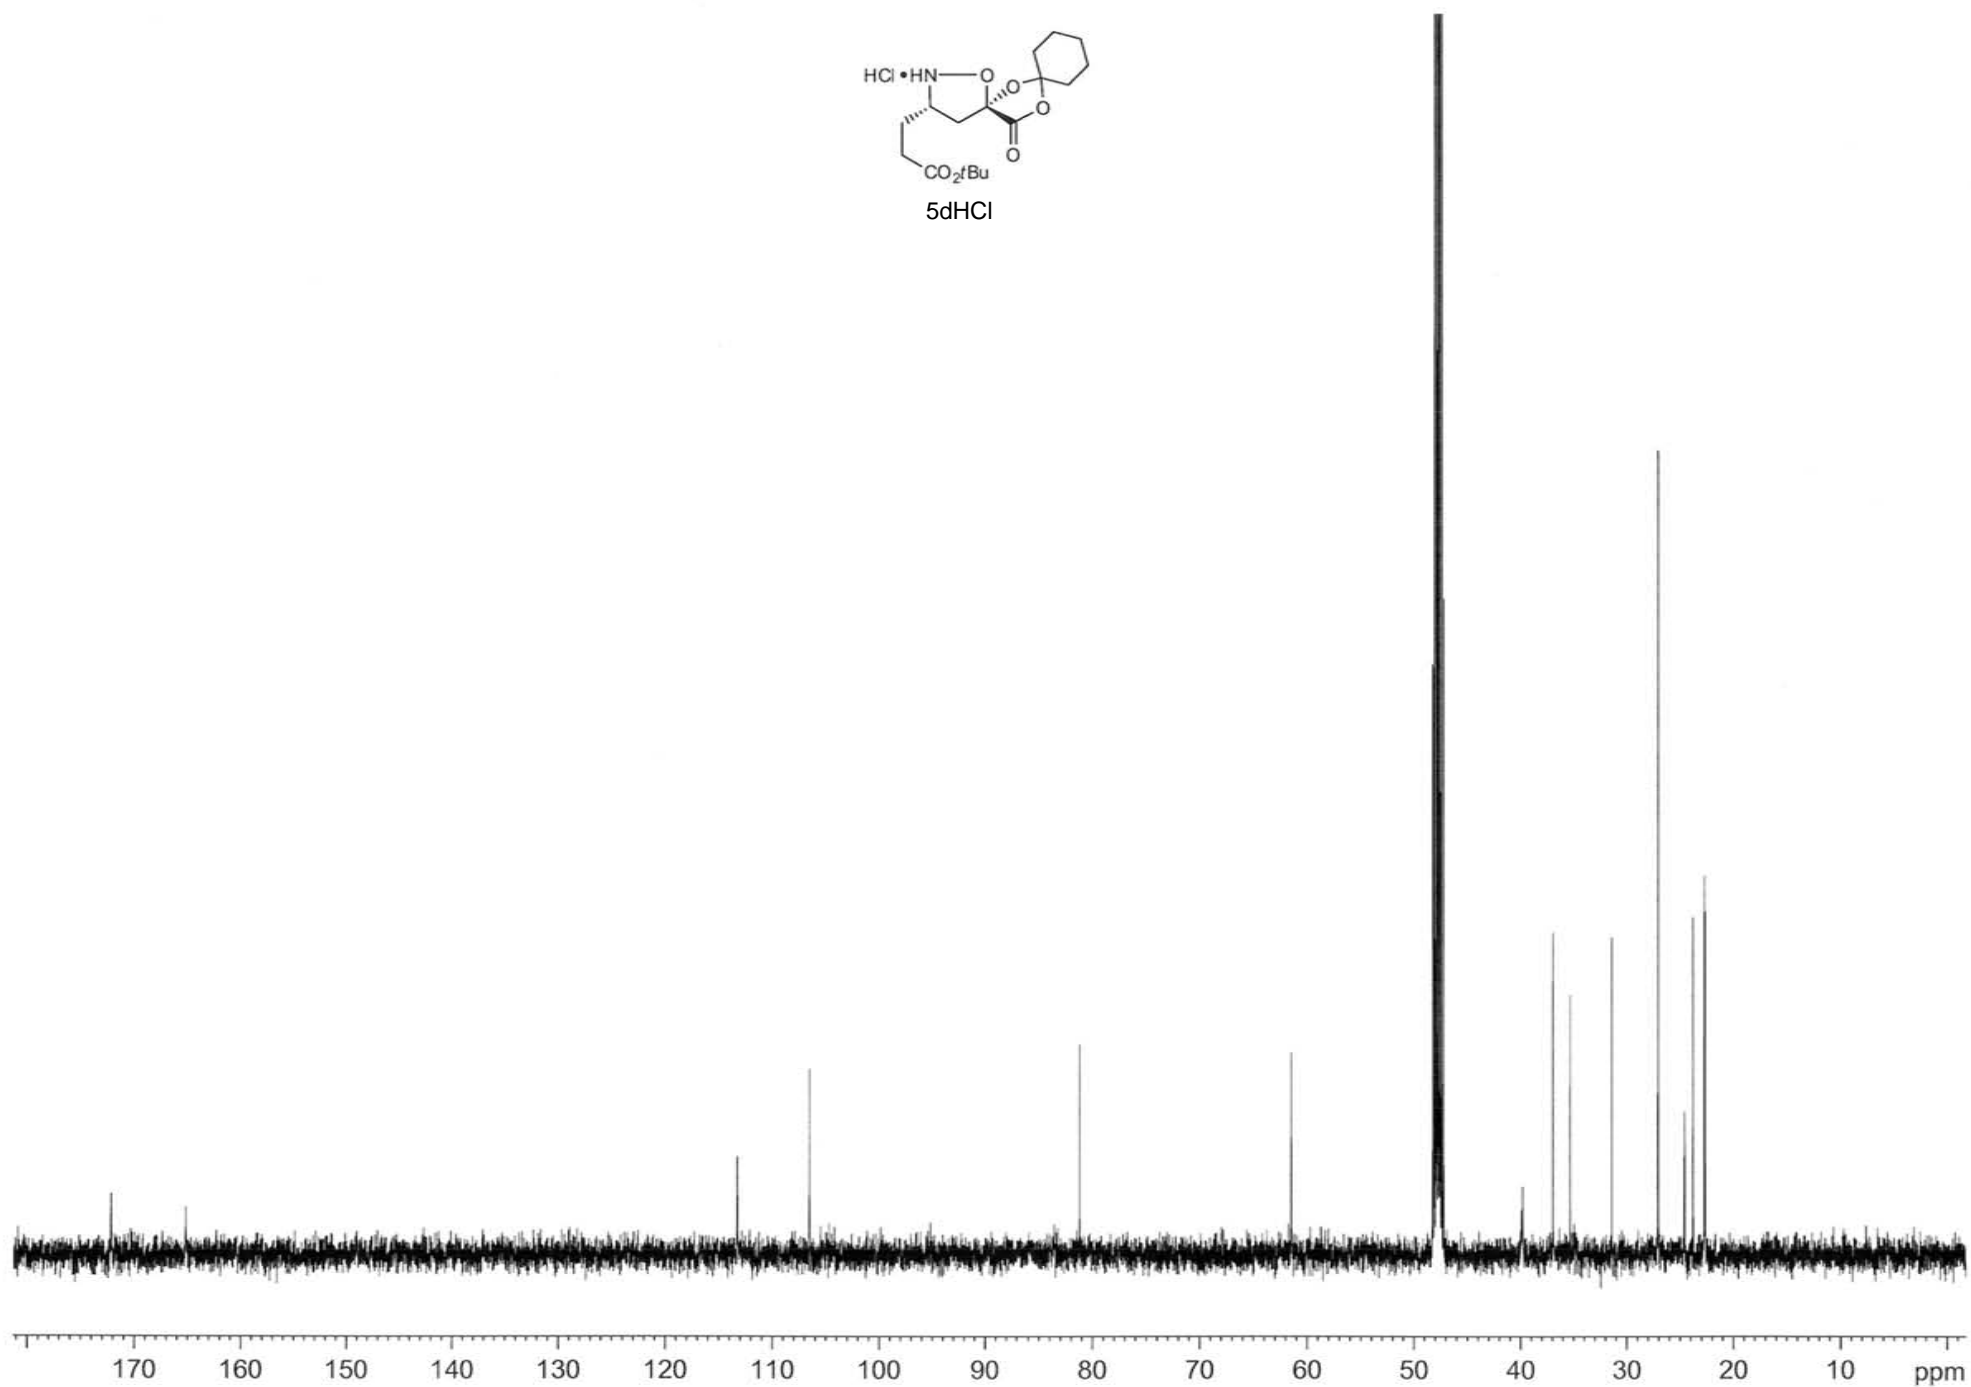



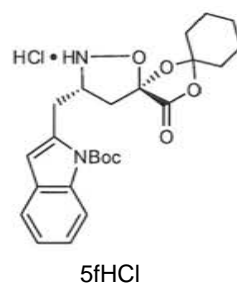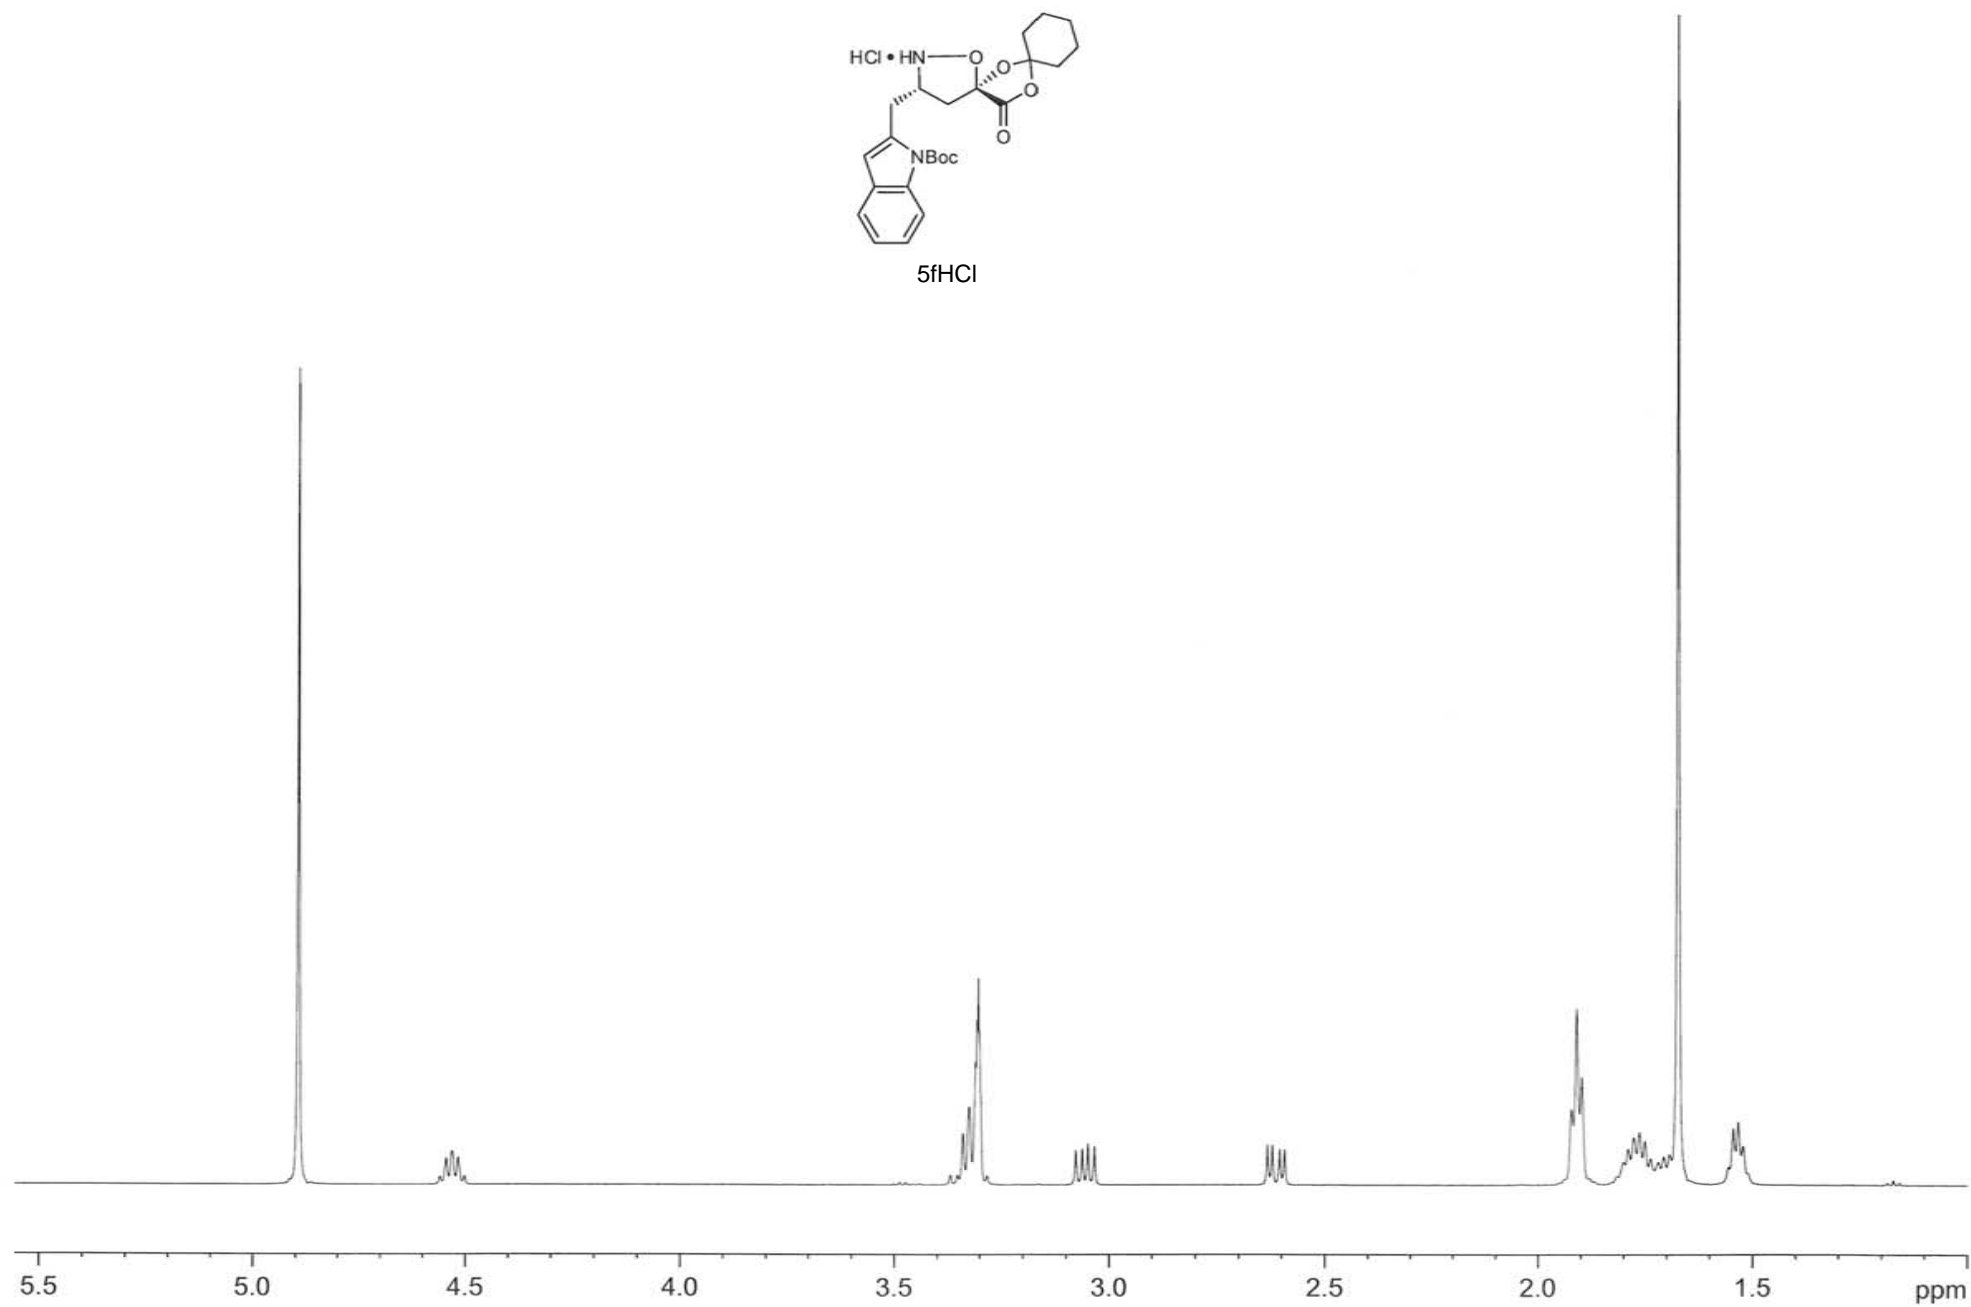

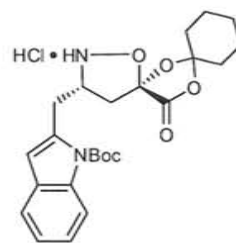

5fHCl

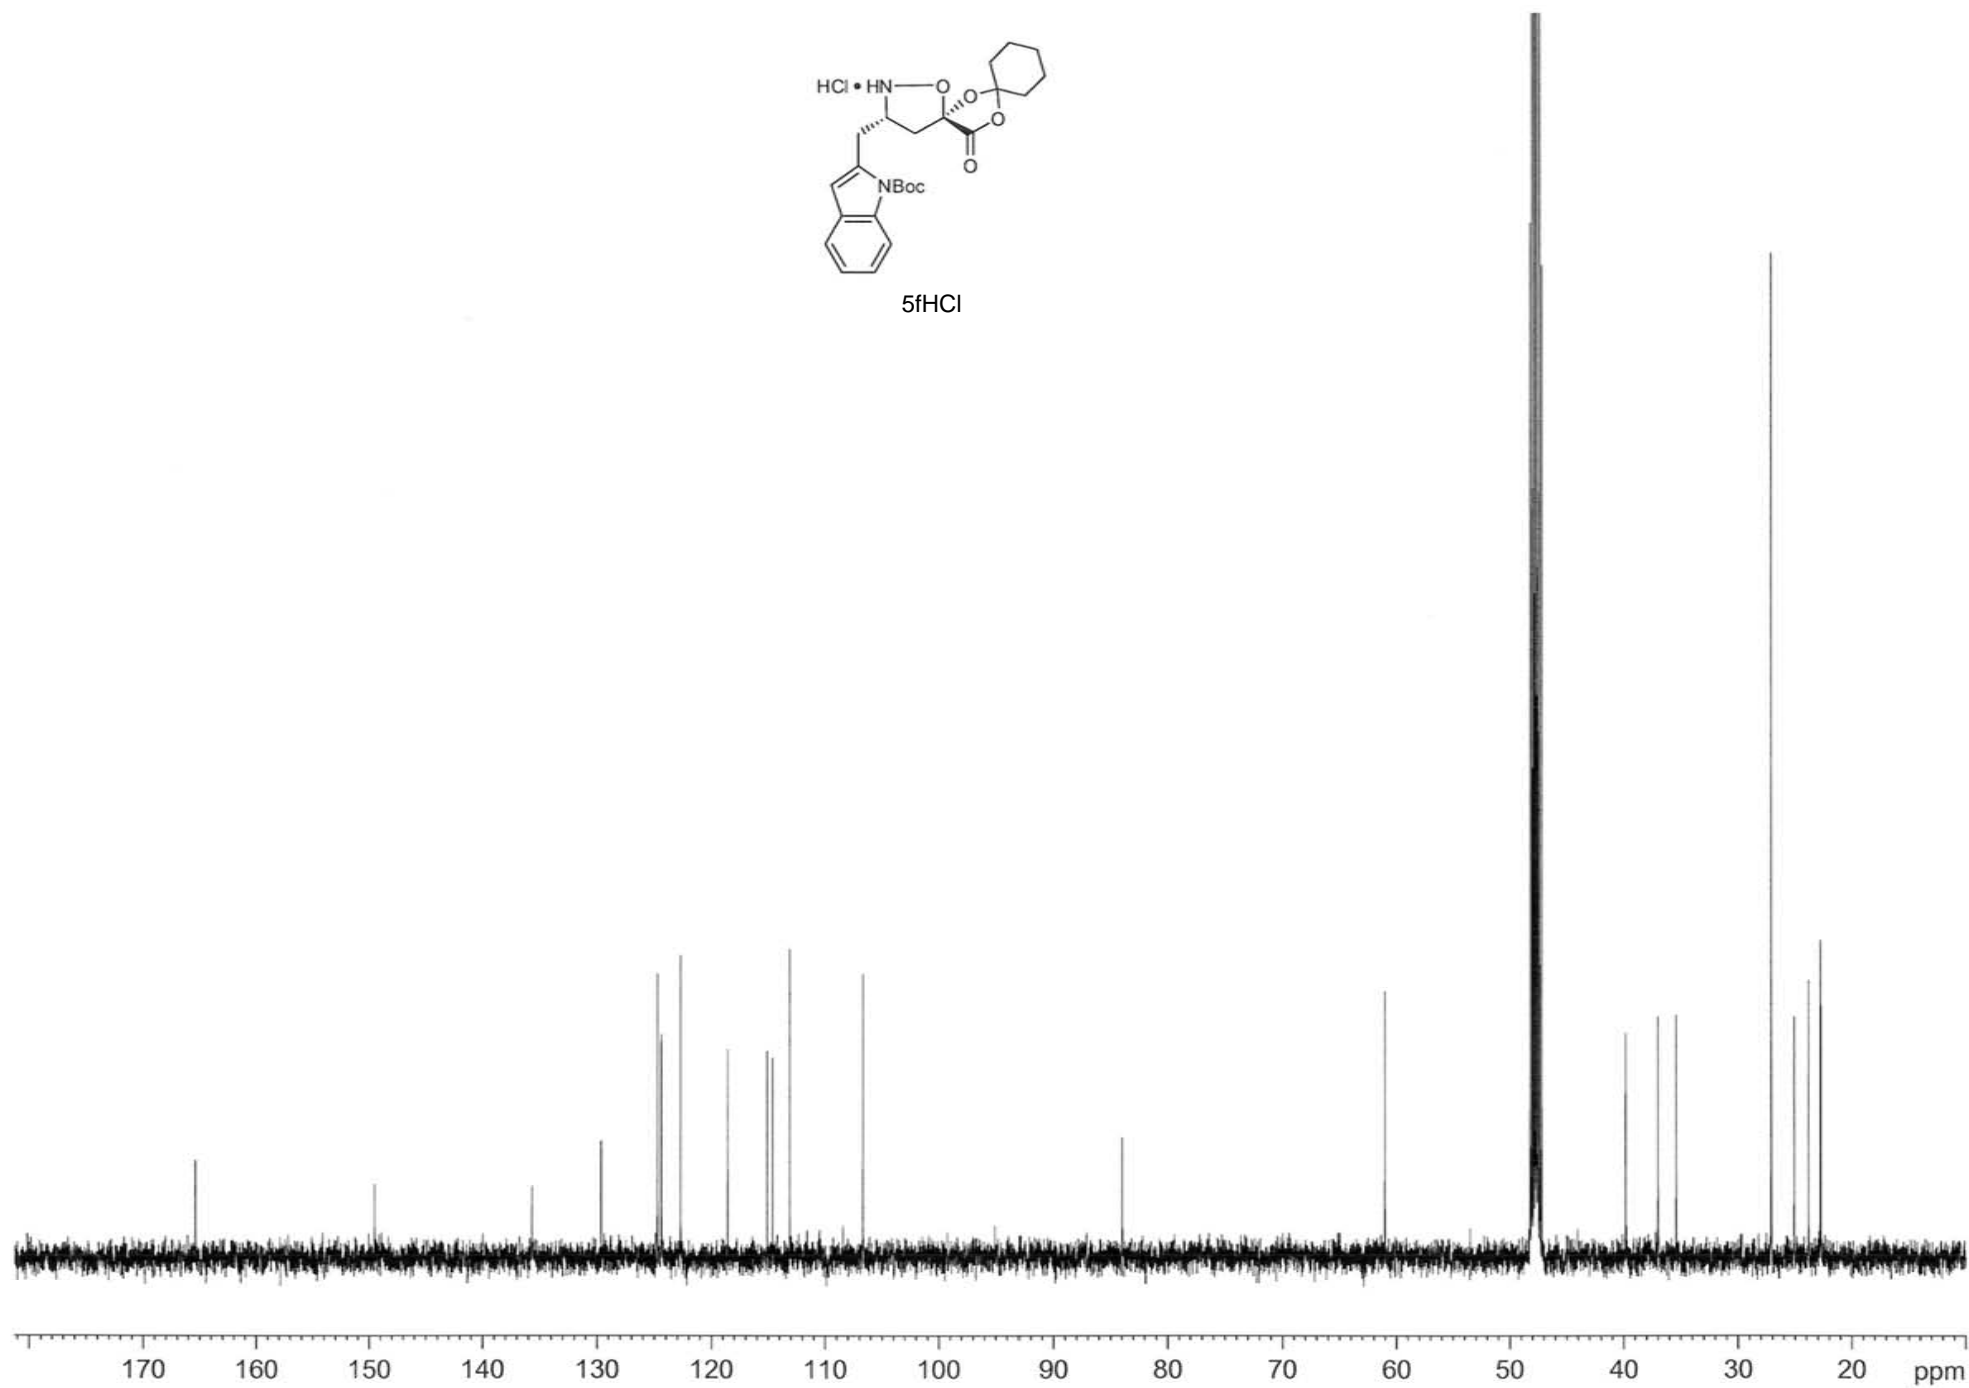

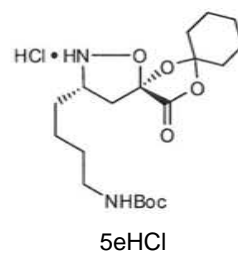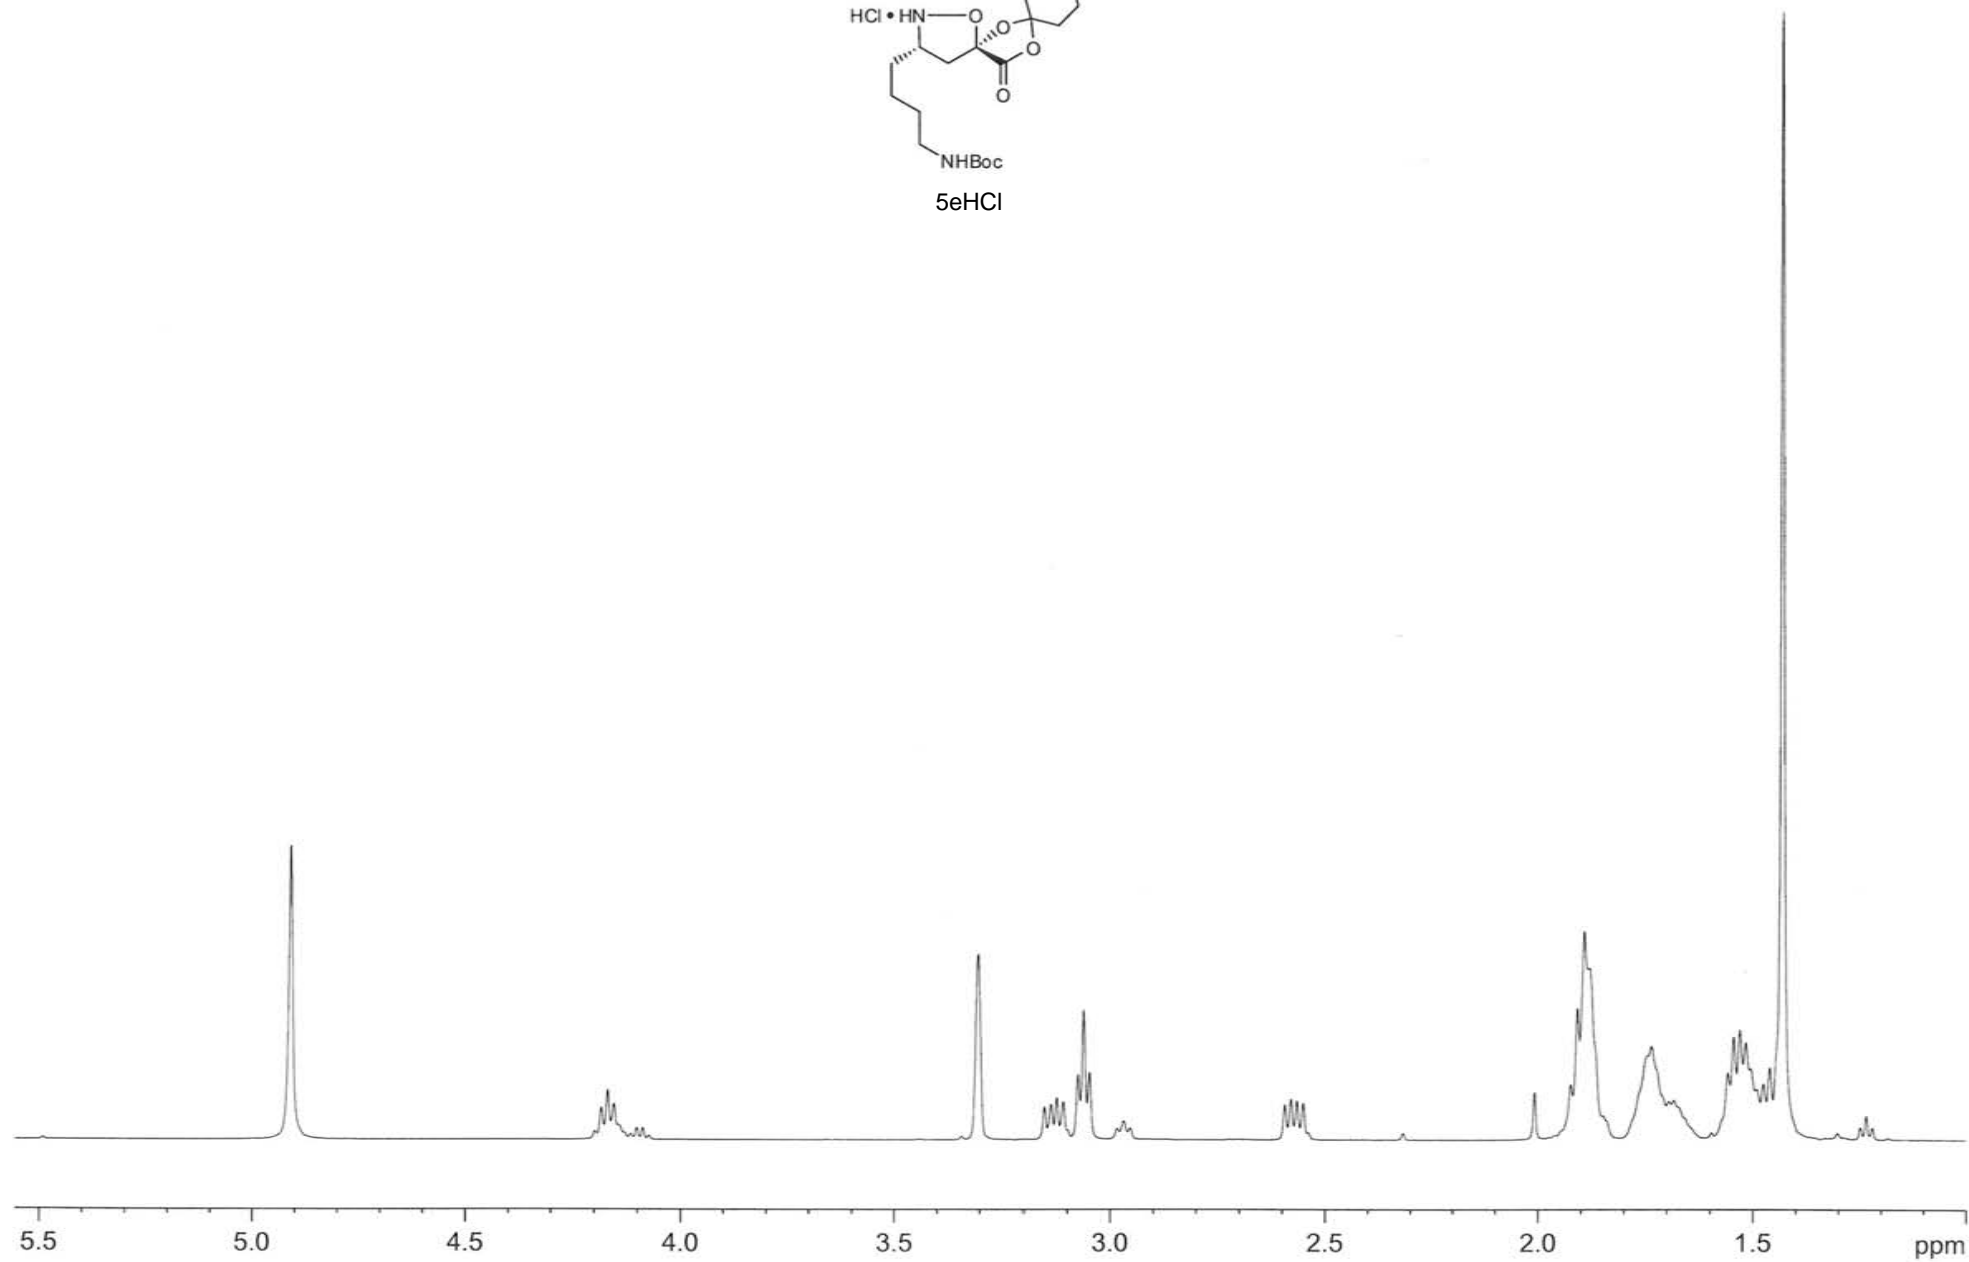

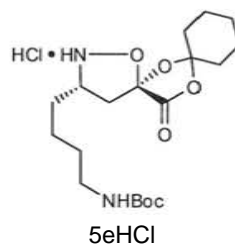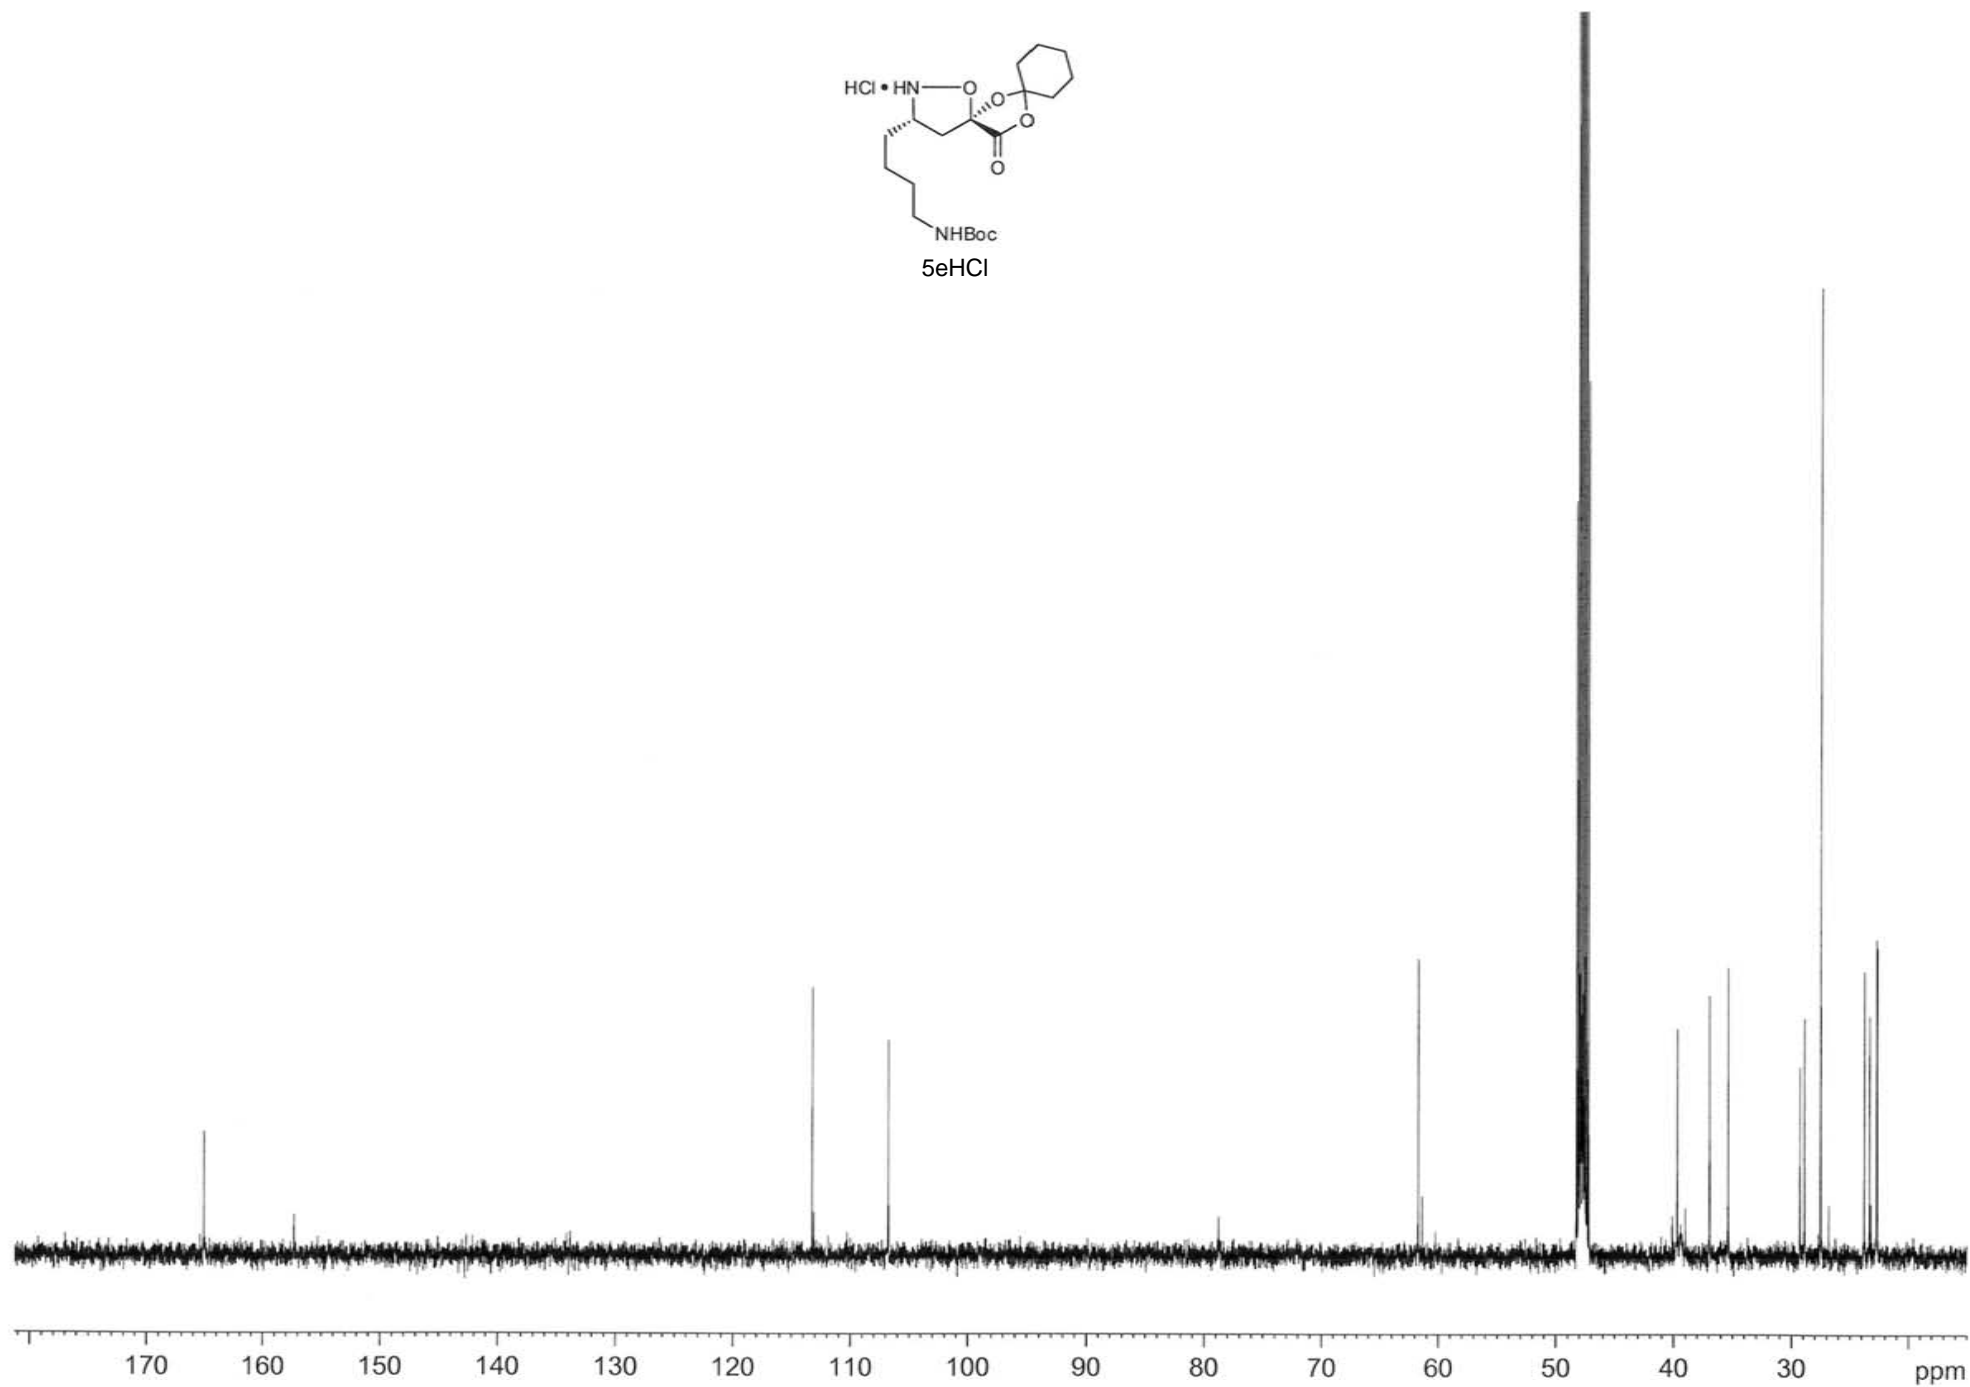

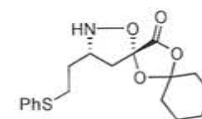

5g

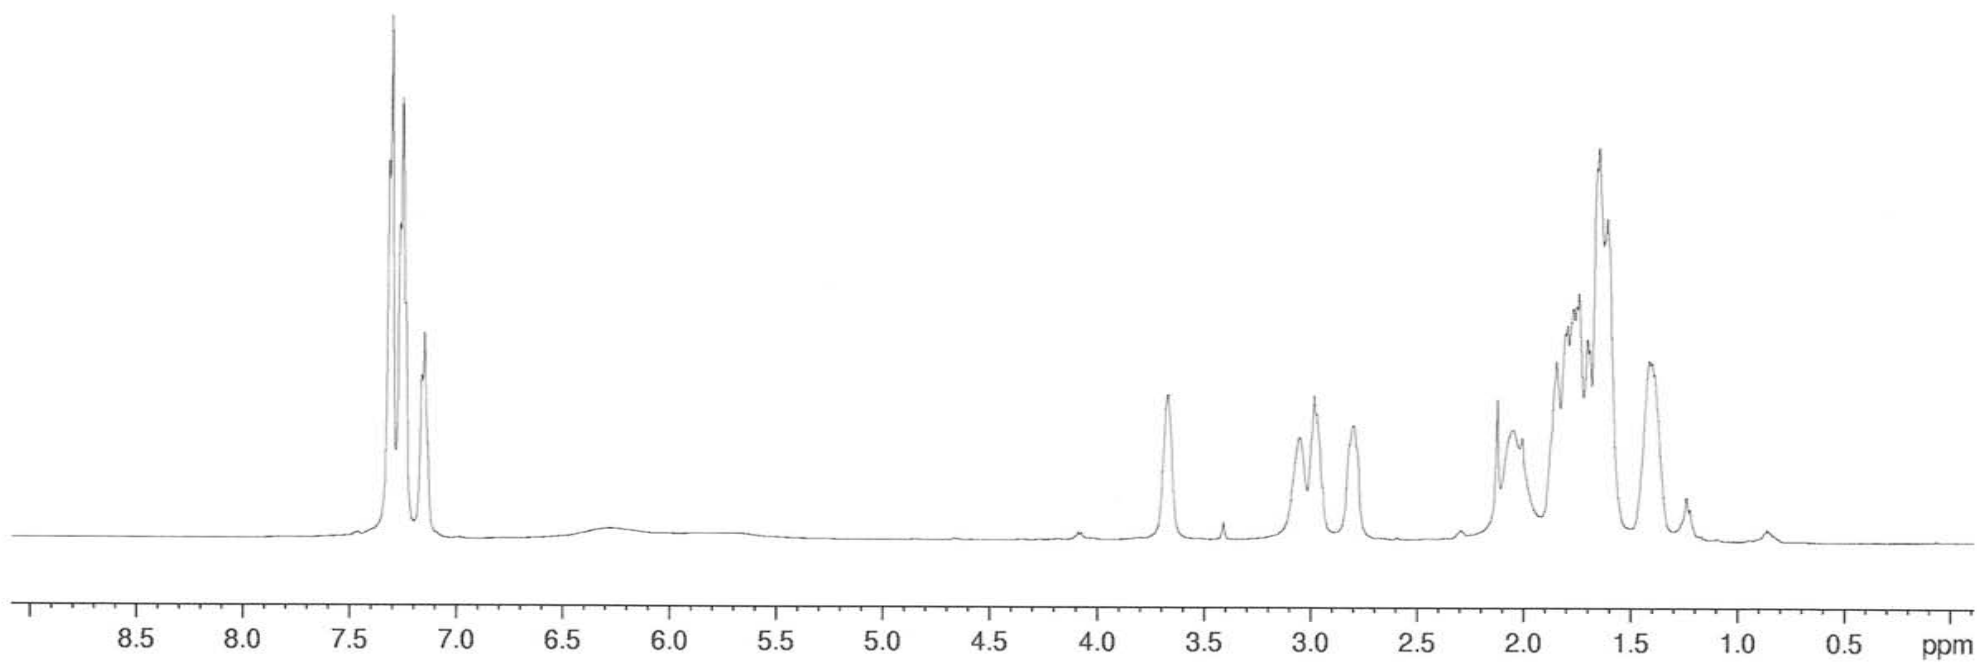

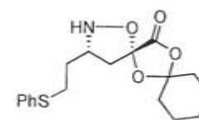

5g

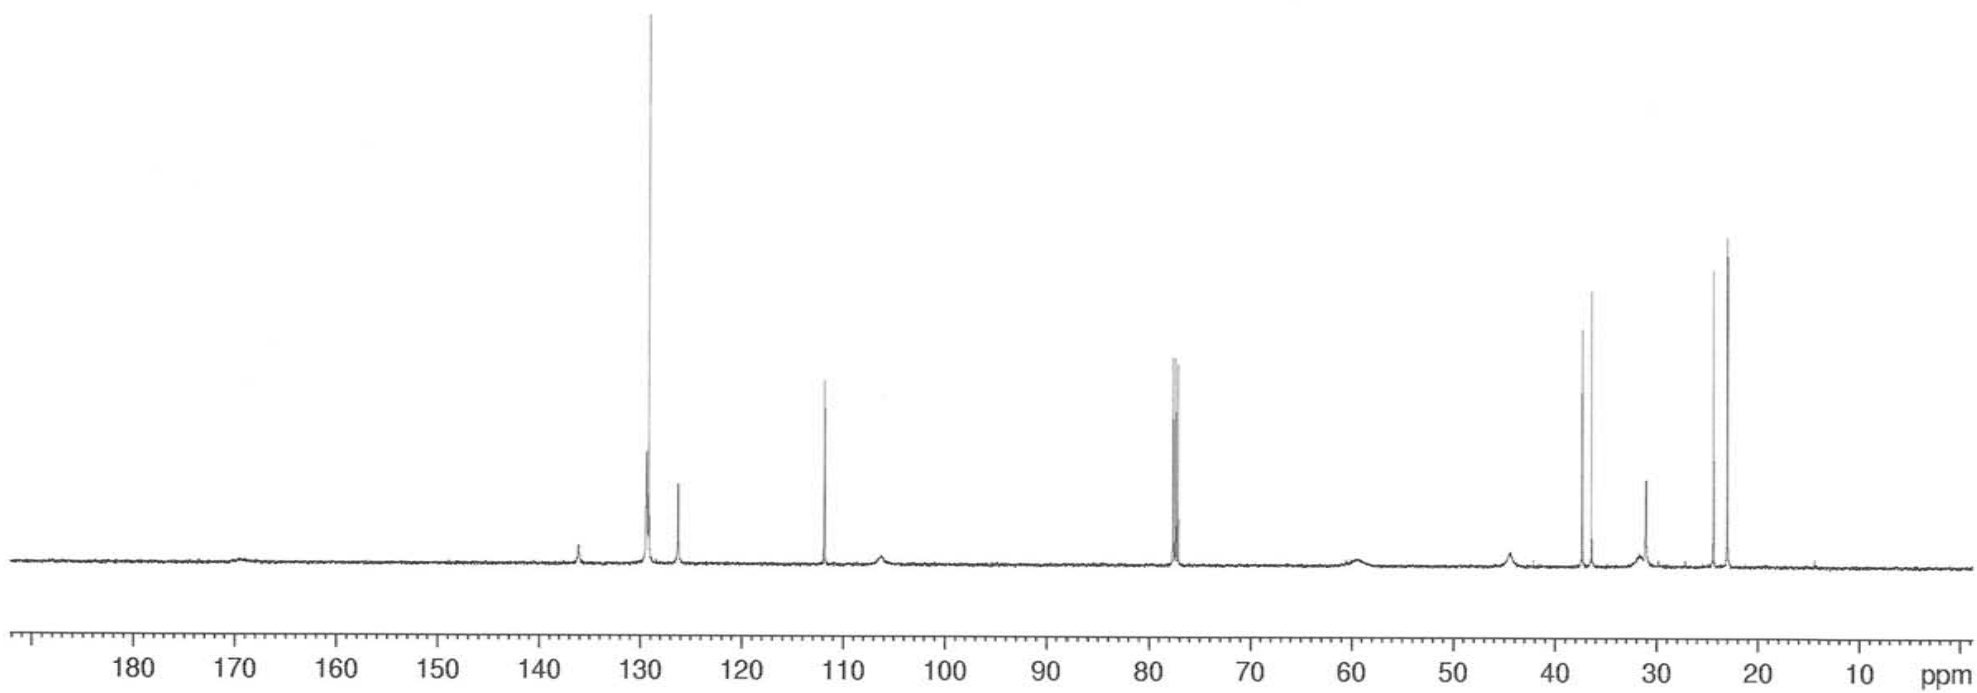

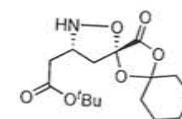

5k

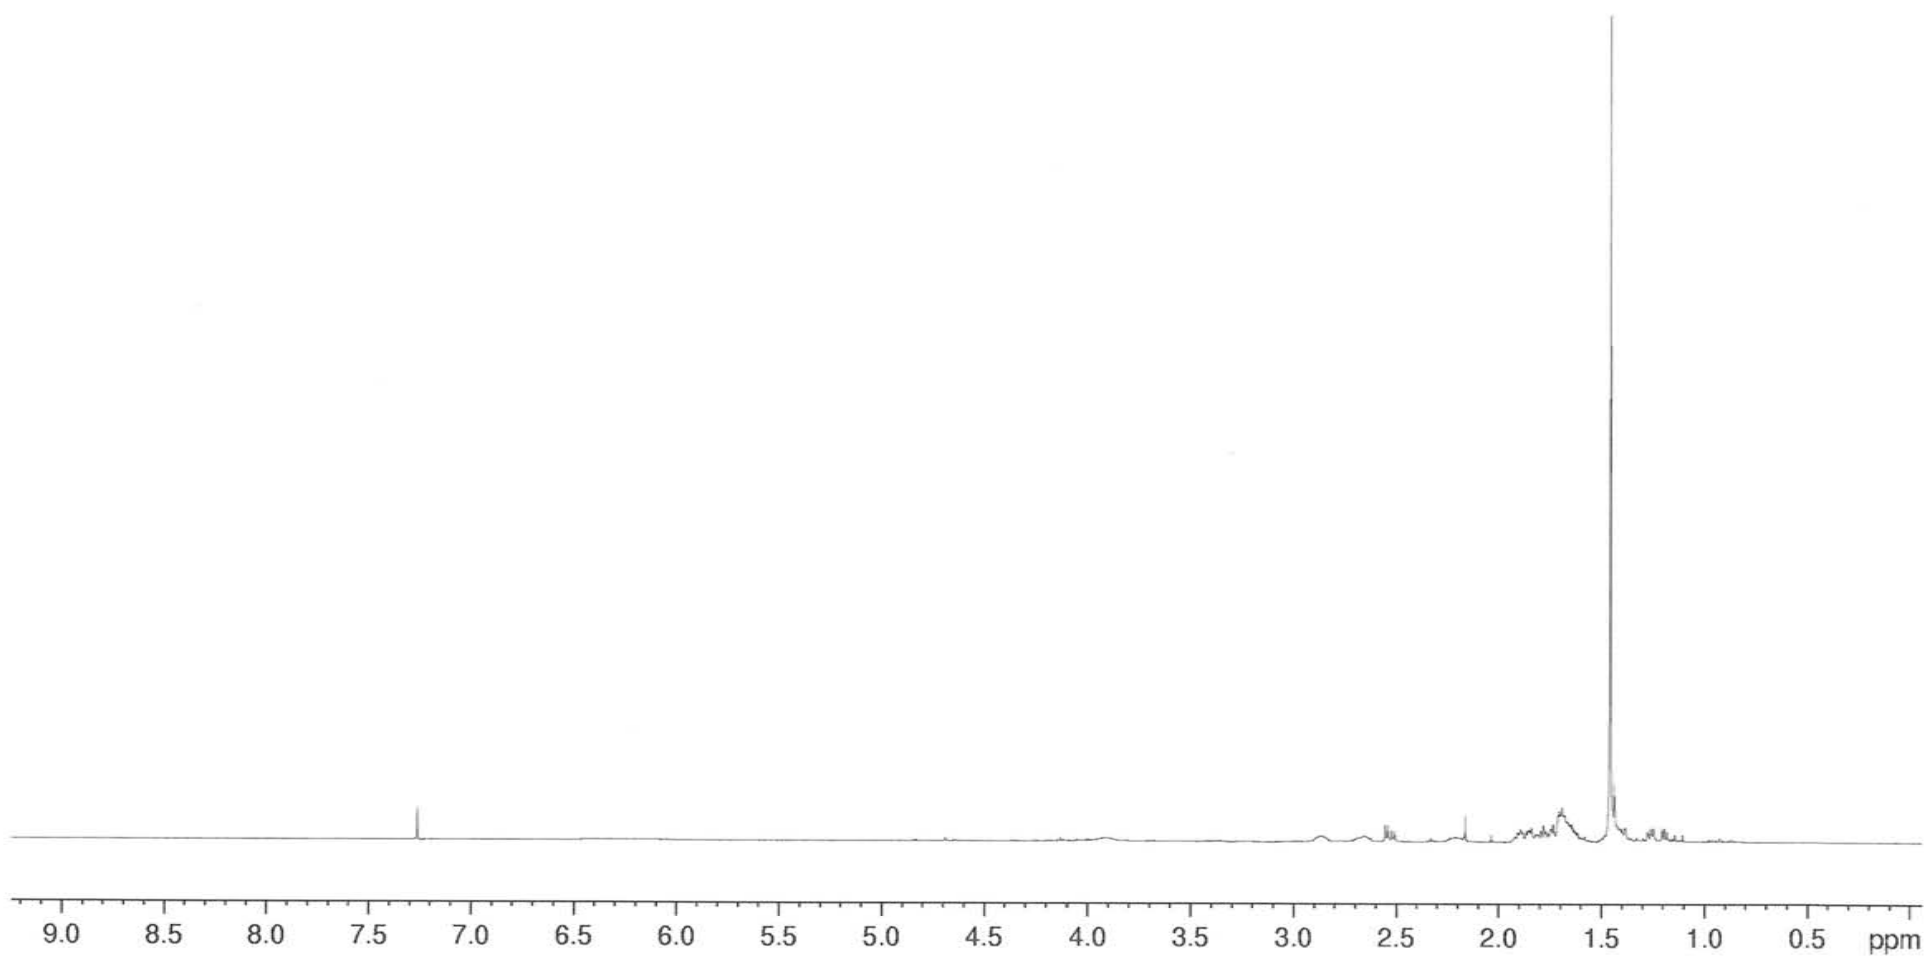

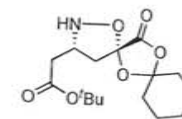

5k

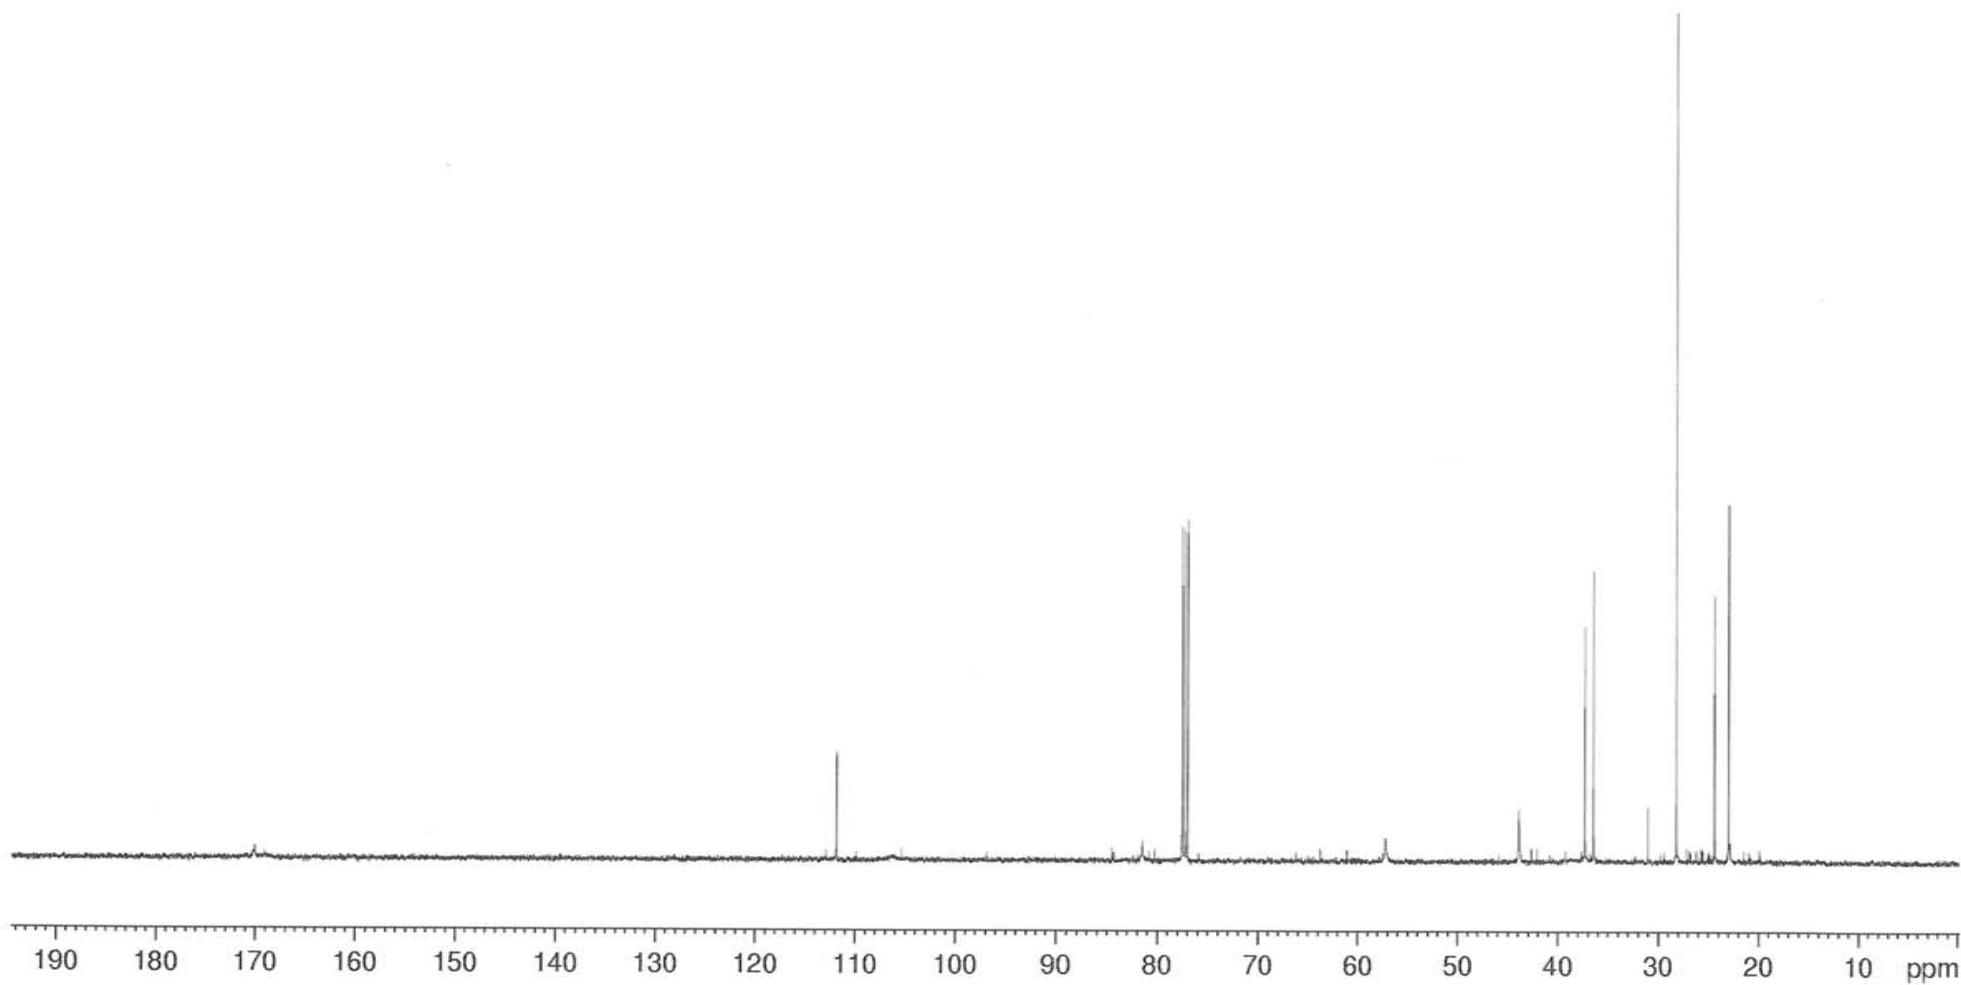



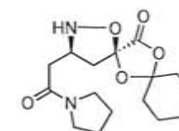

5I

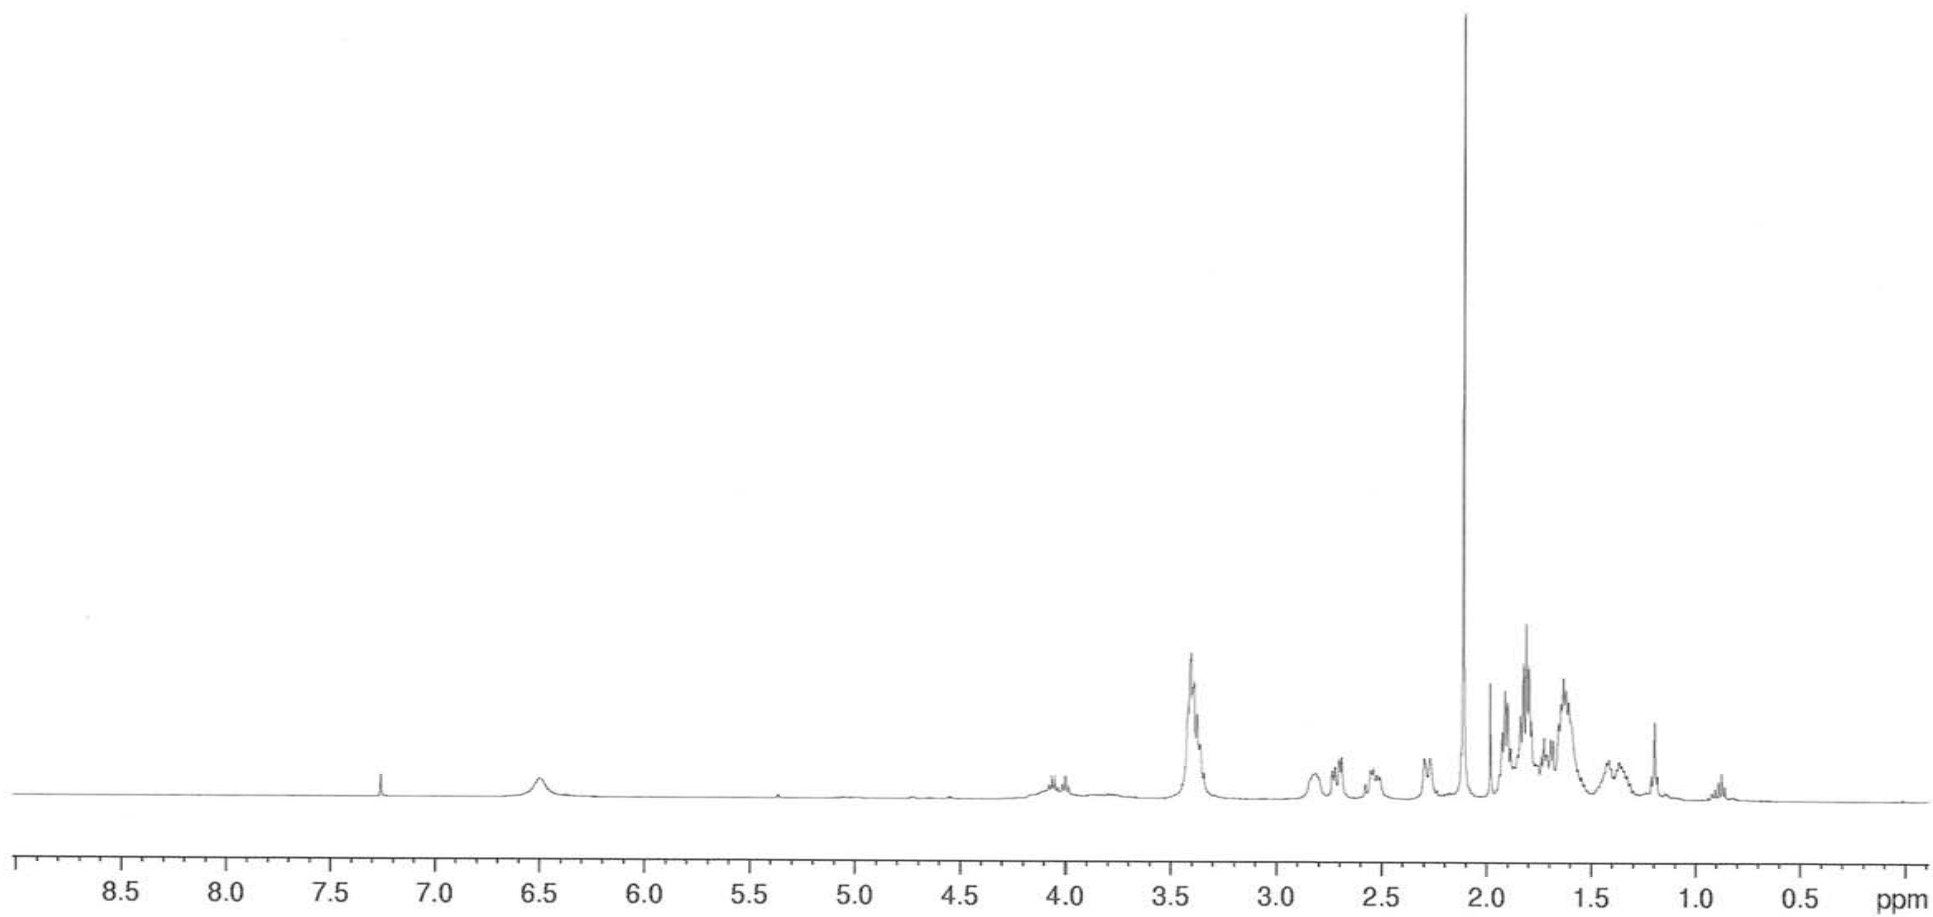

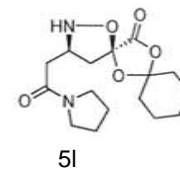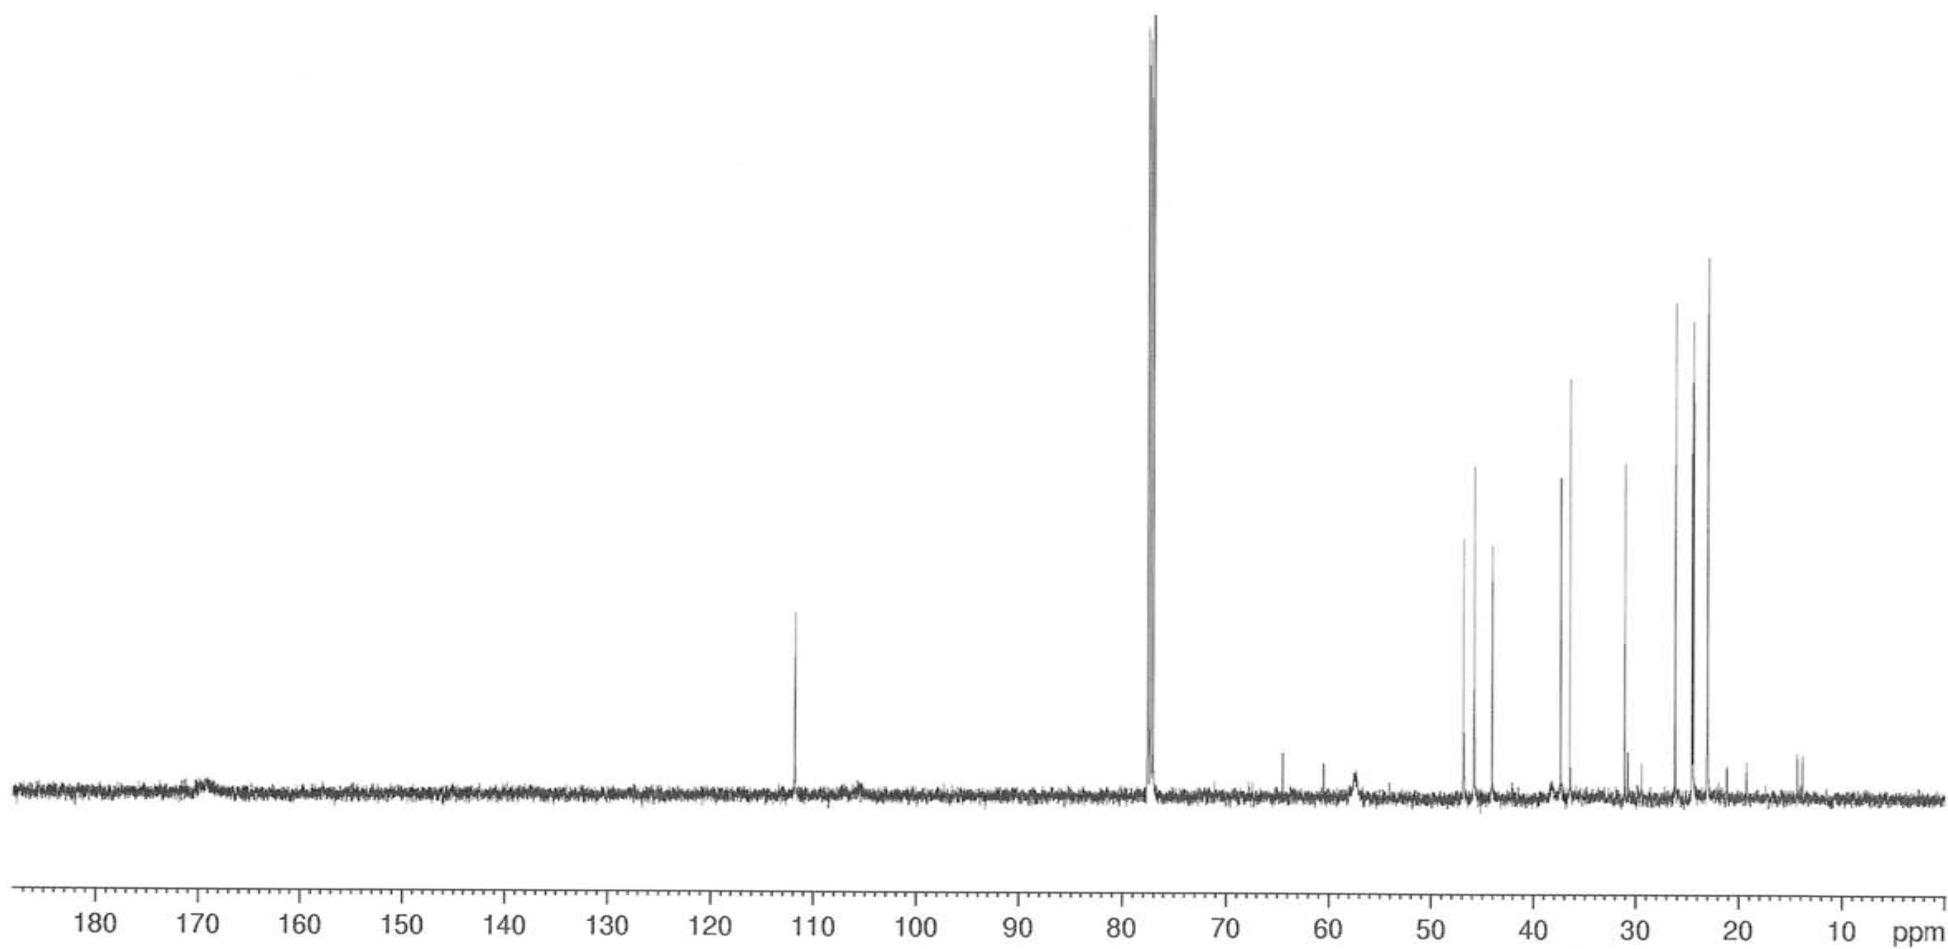

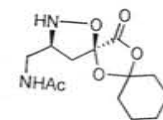

5n

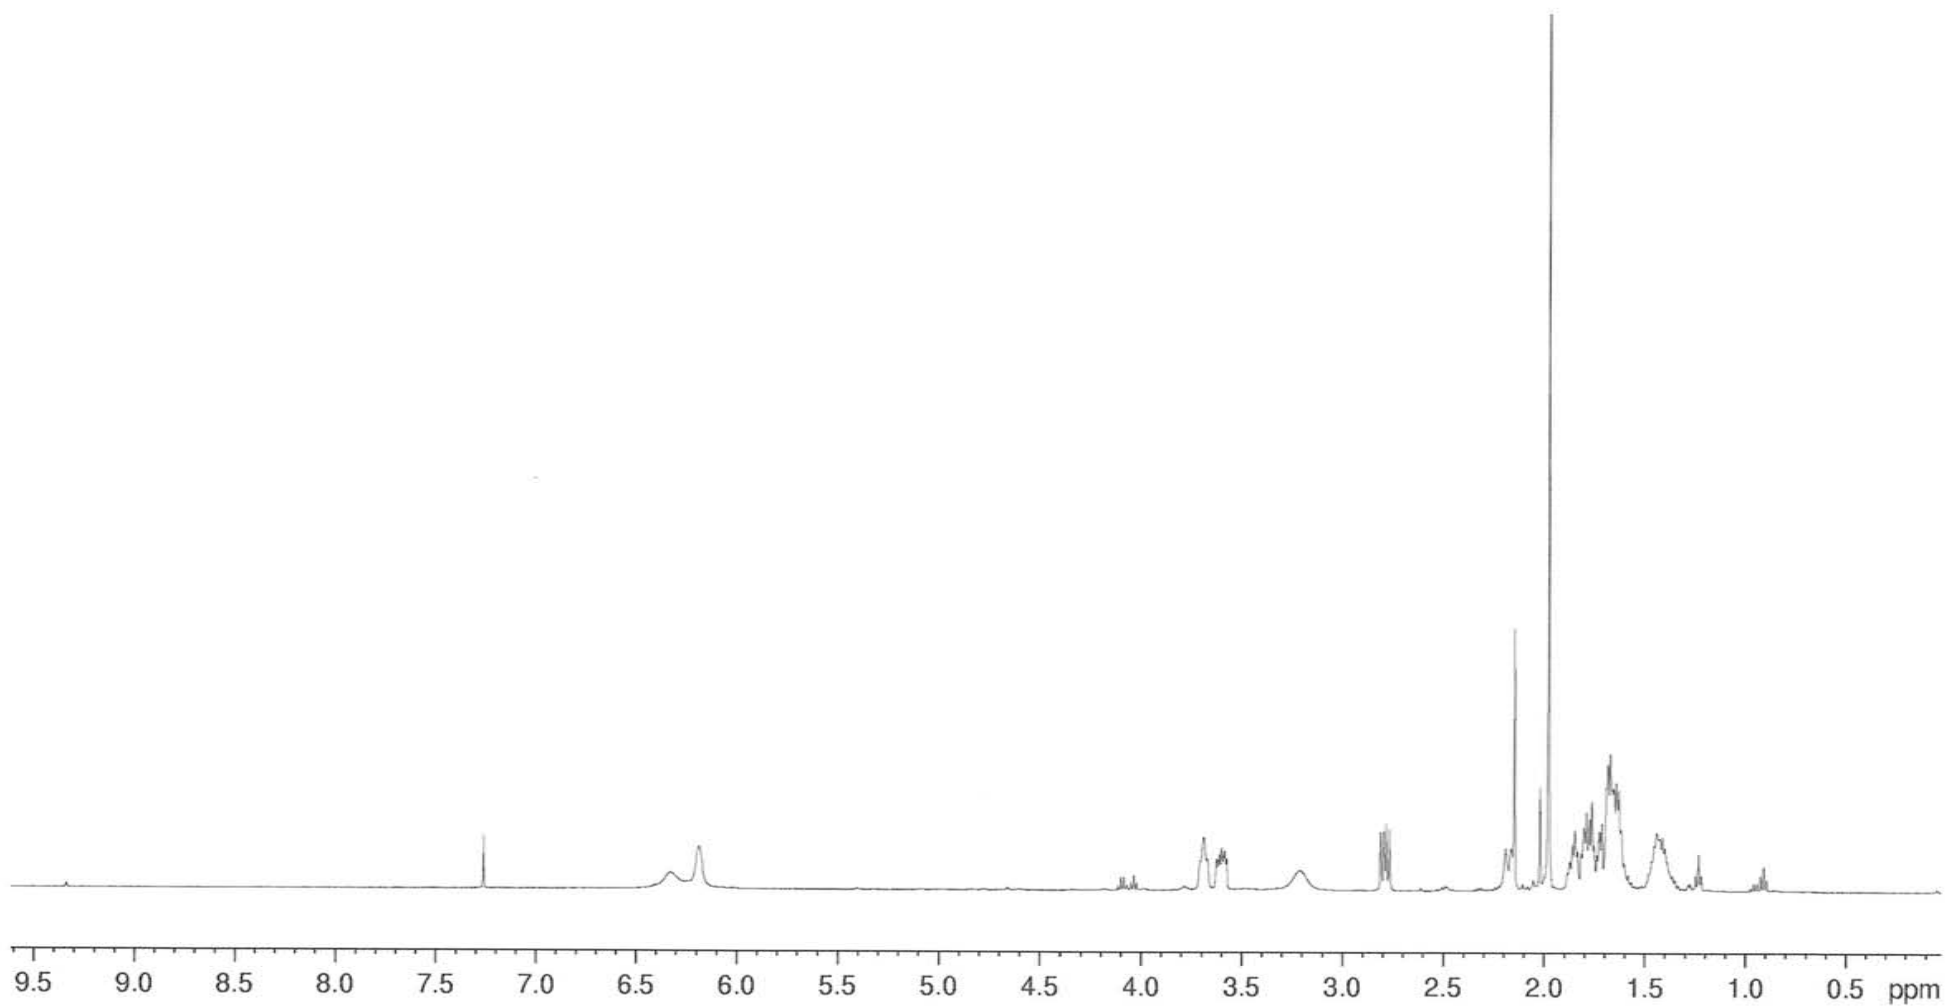

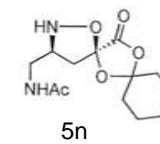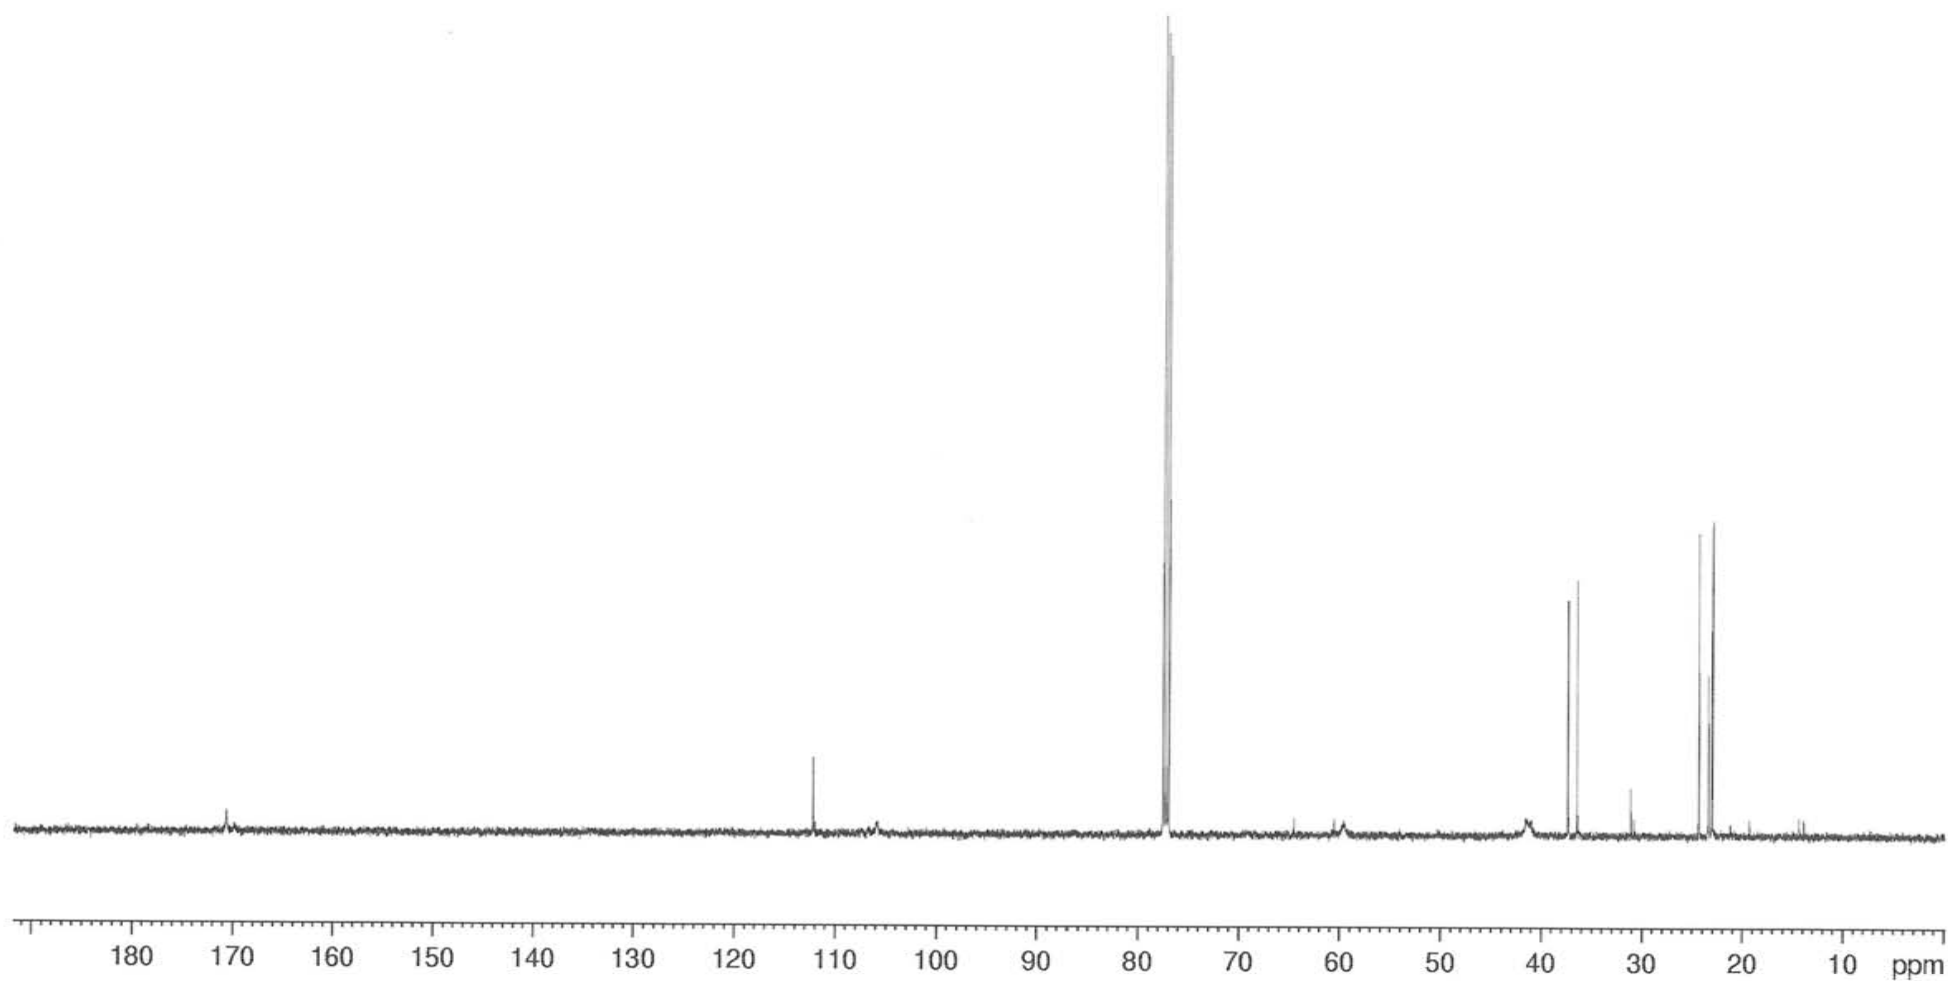

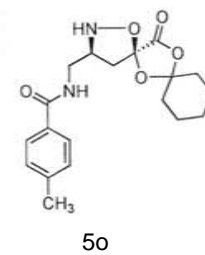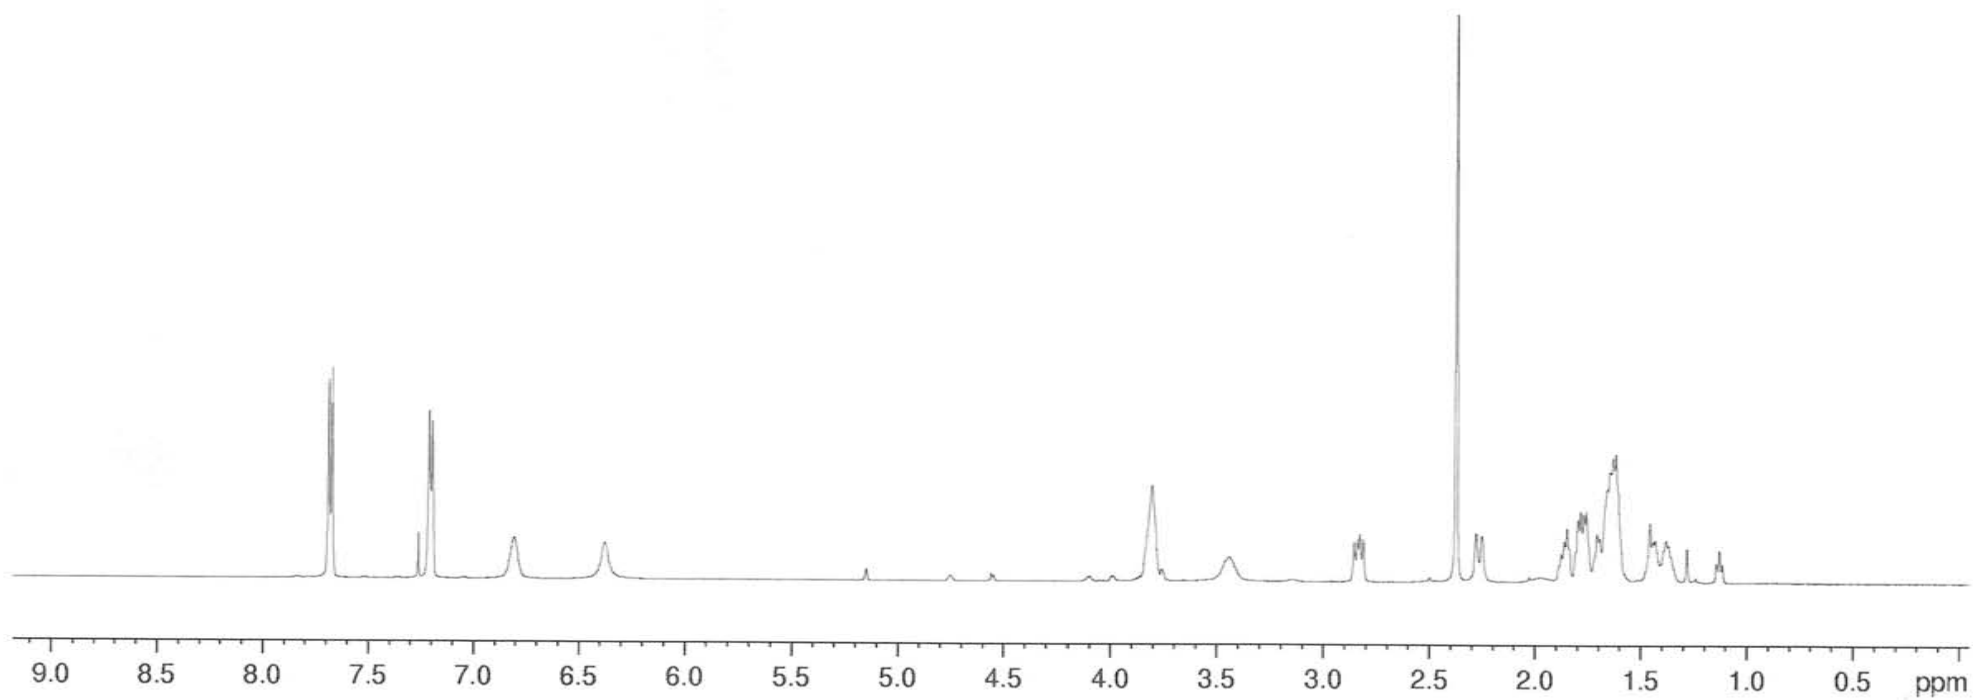

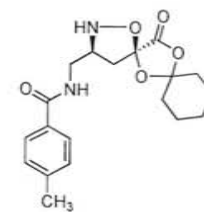

50

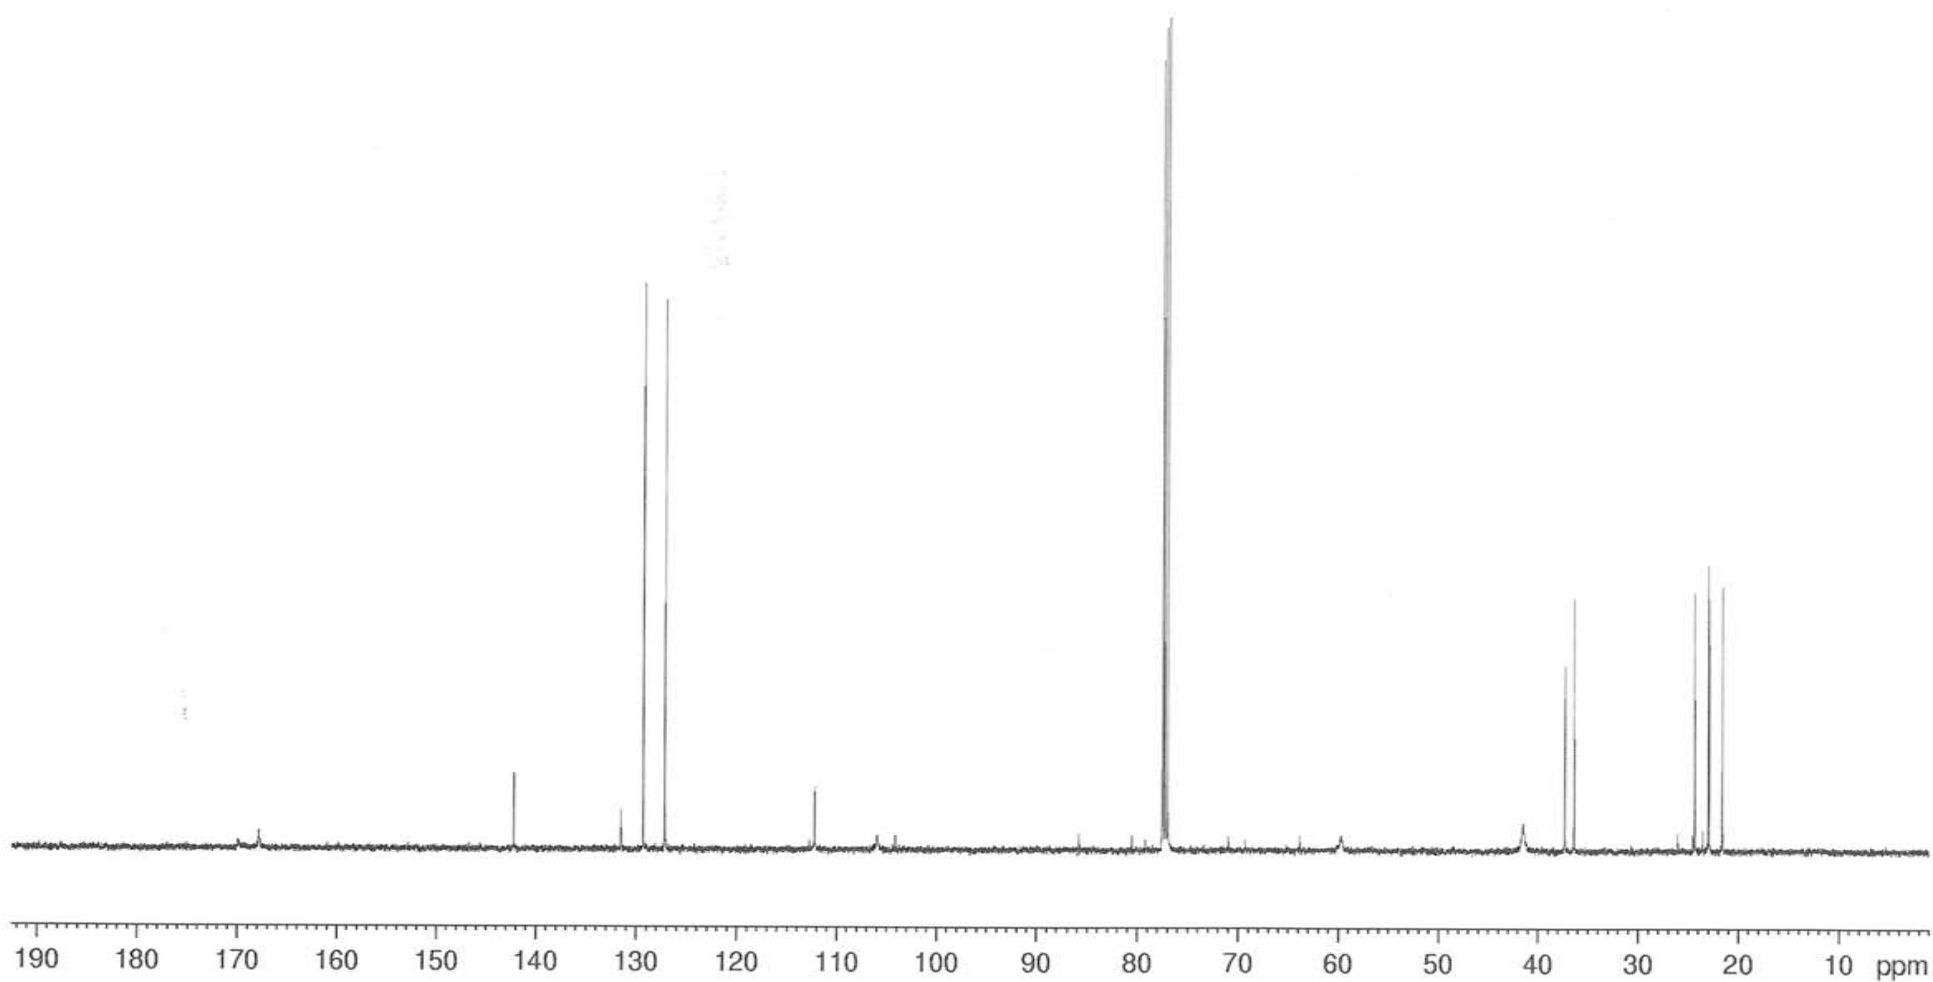

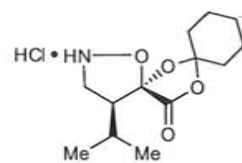

5pHCl

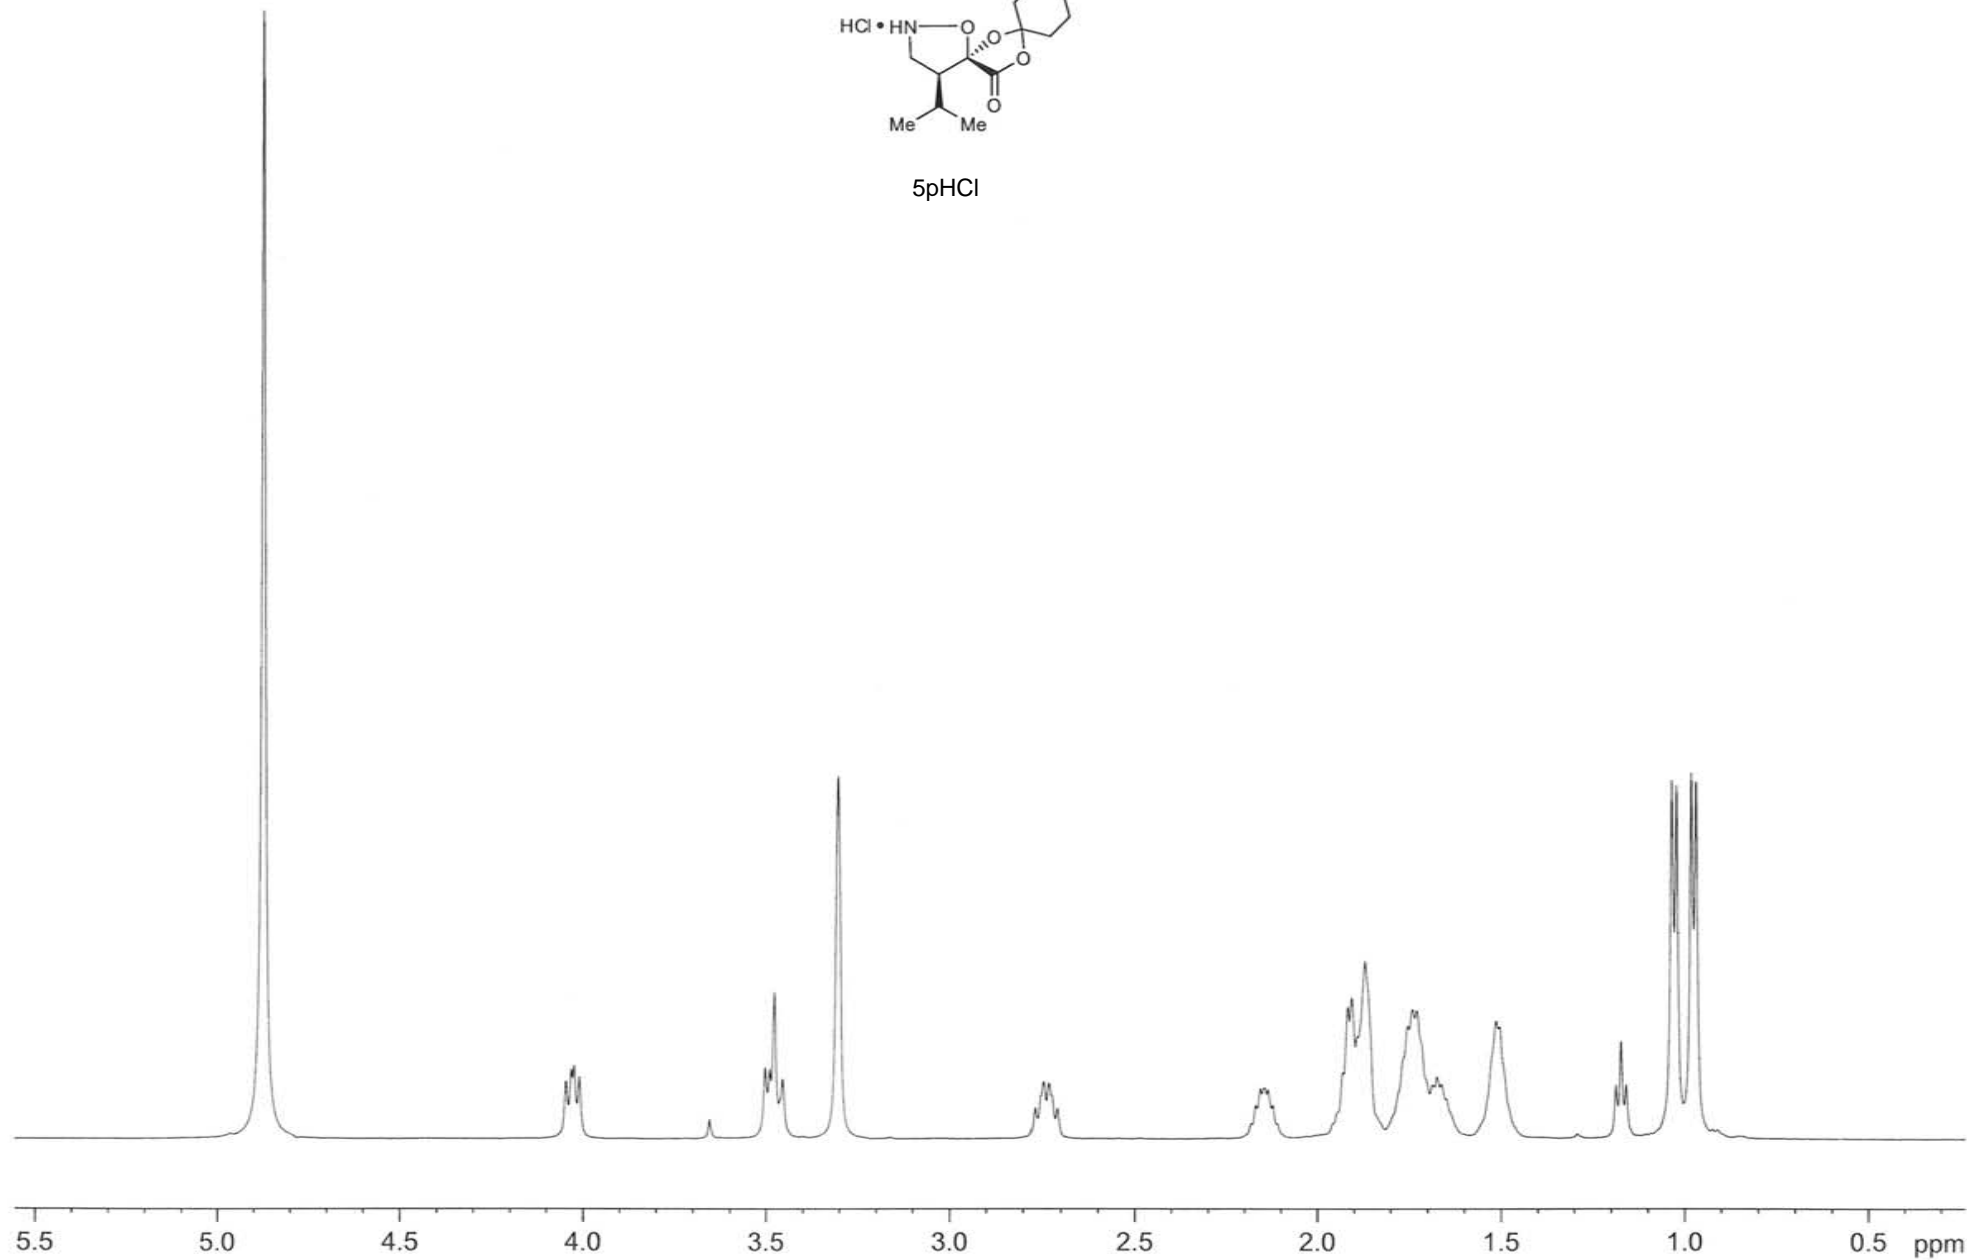

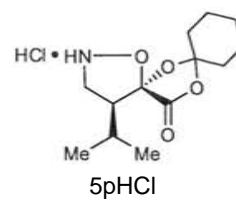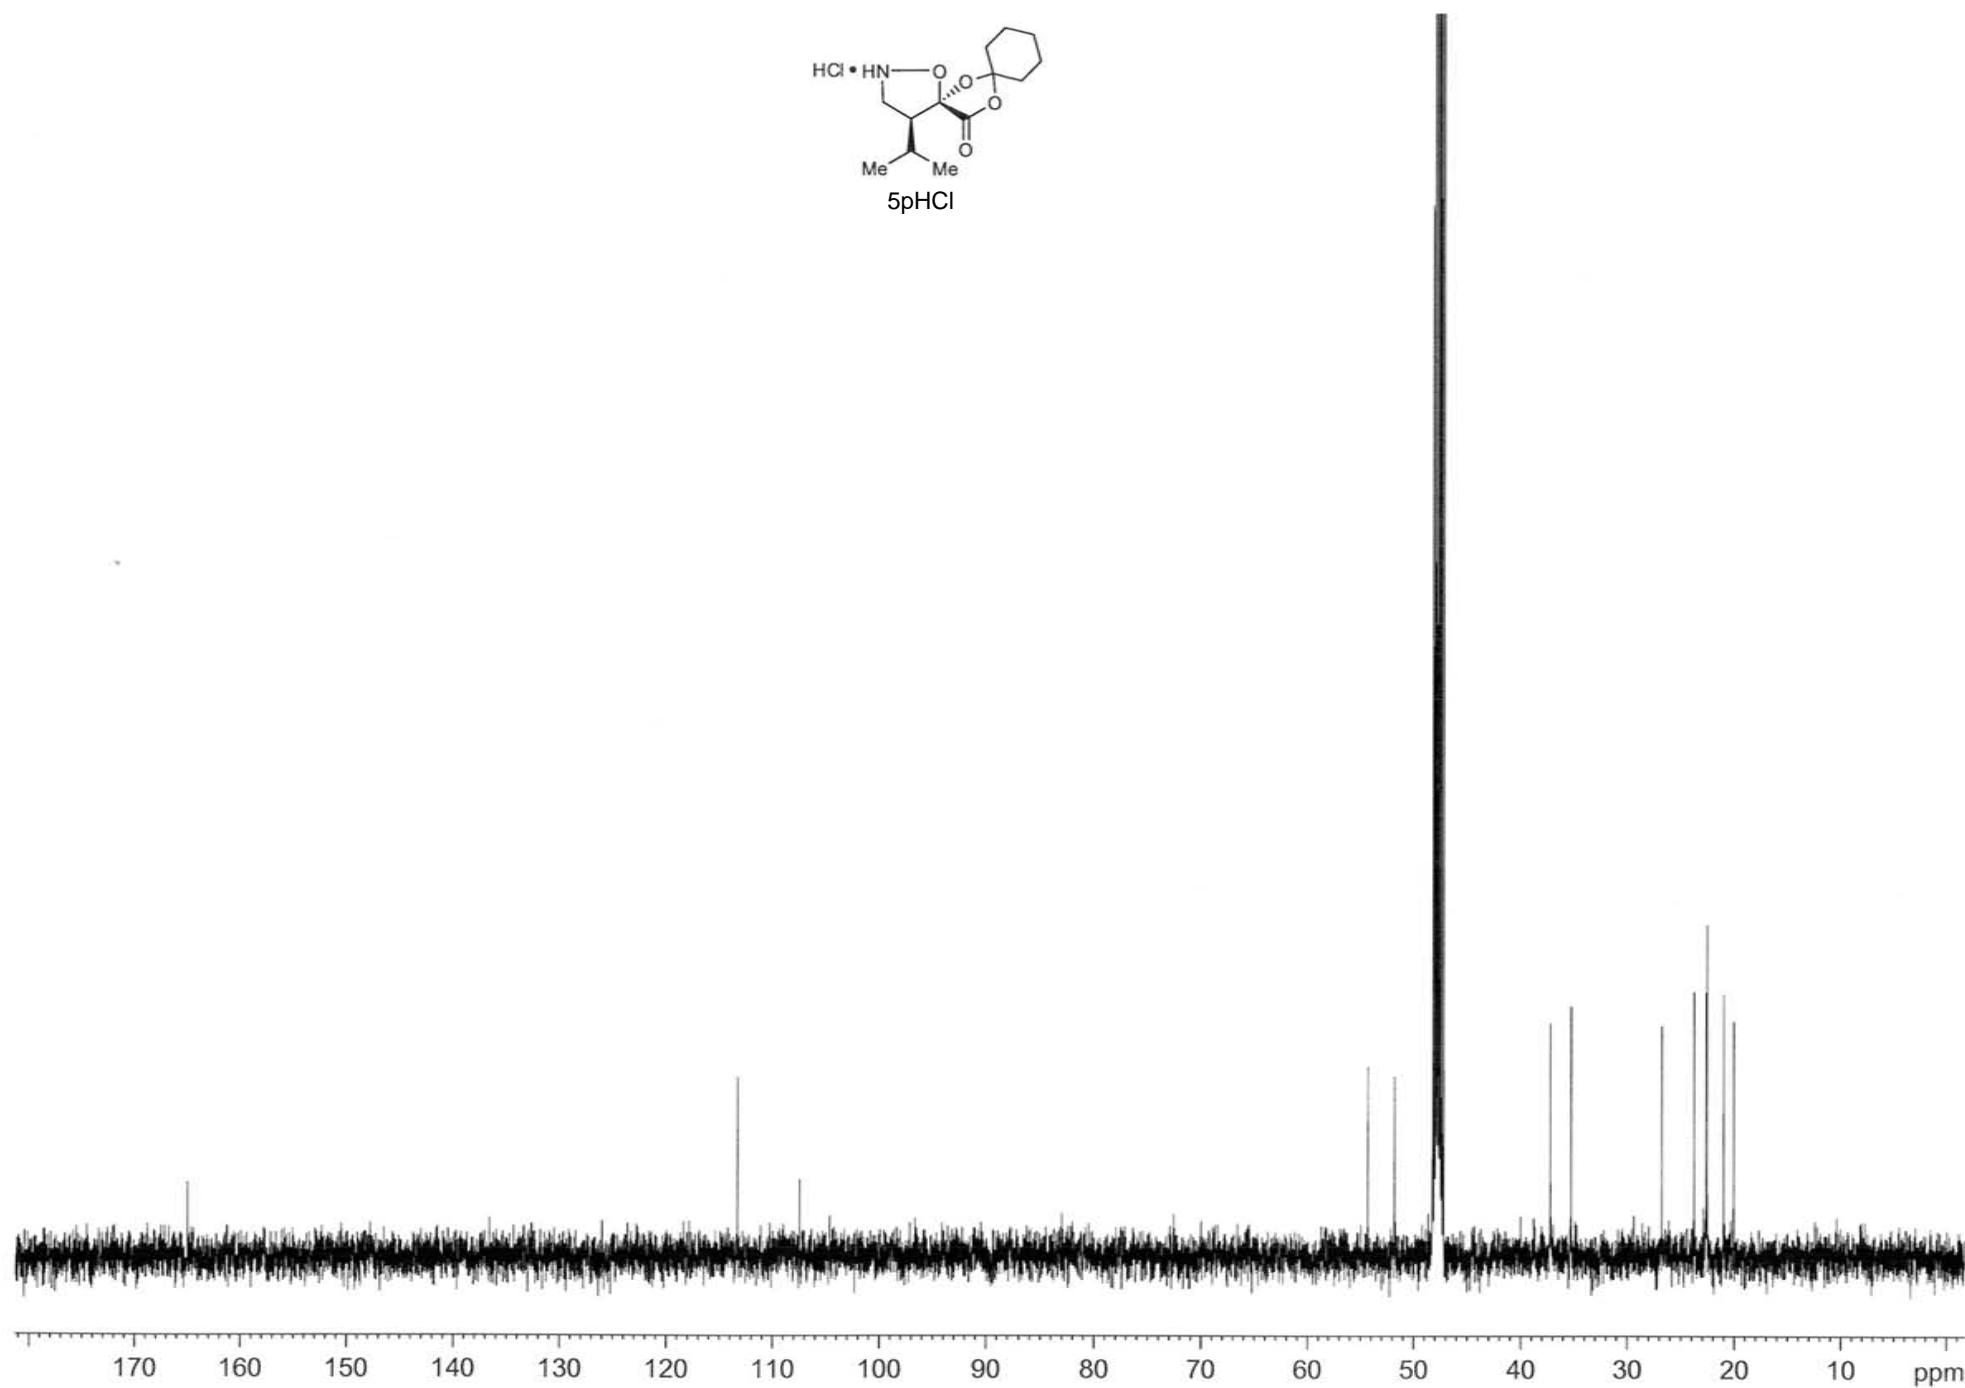



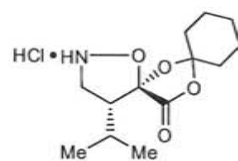

5qHCl

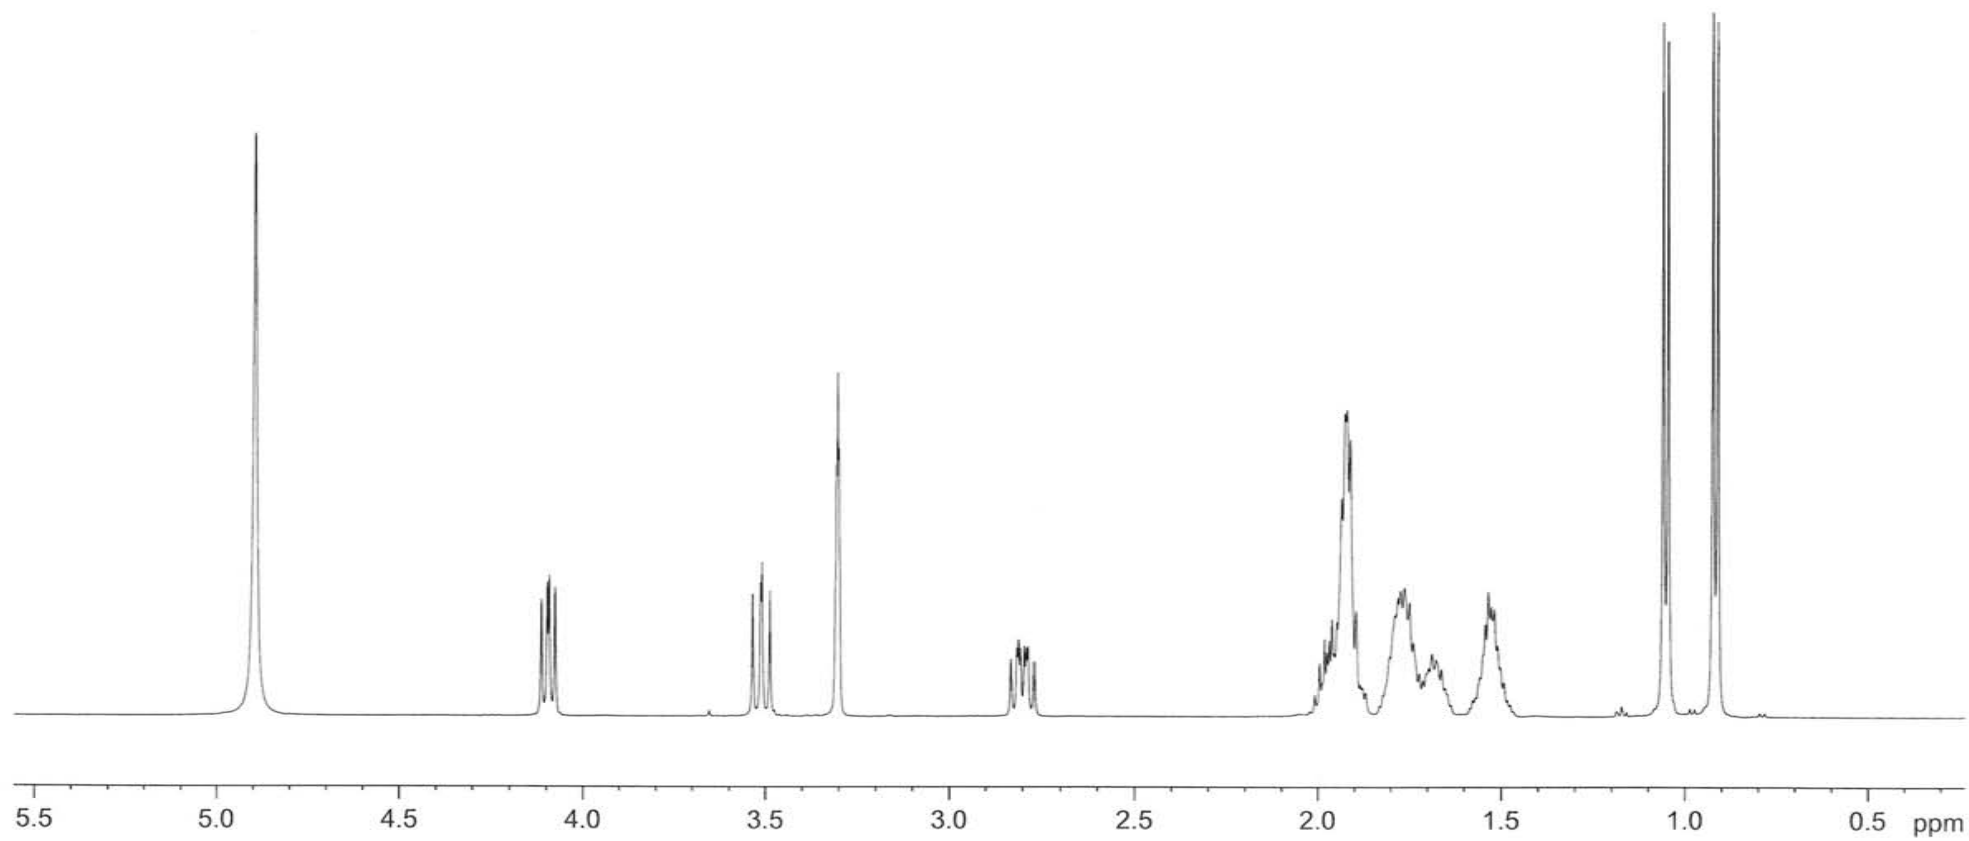

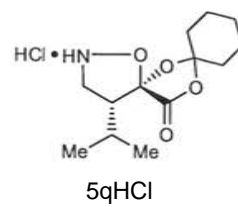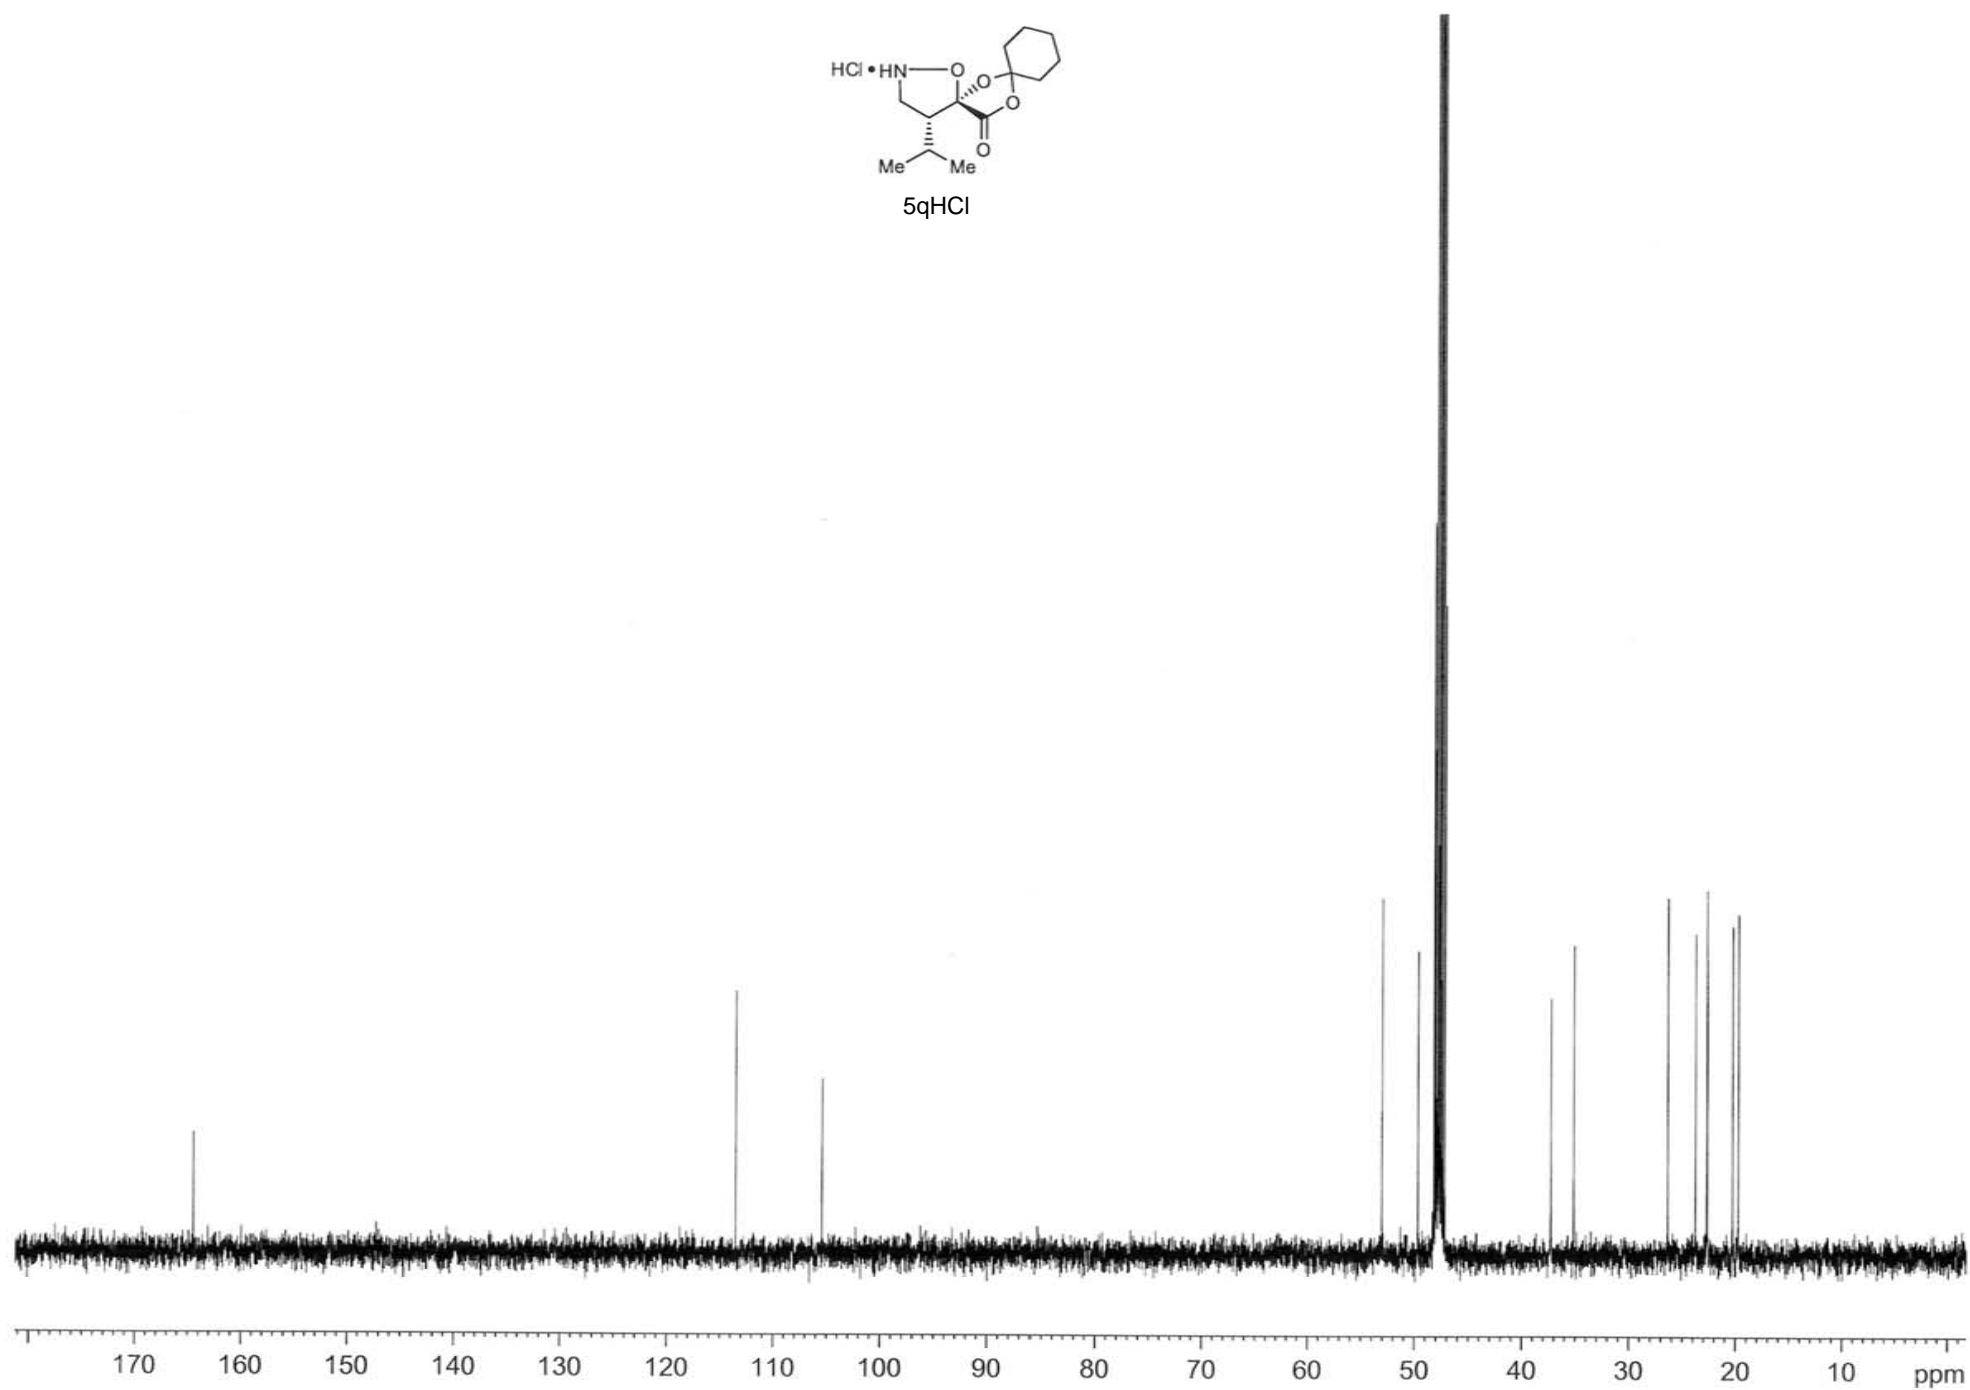

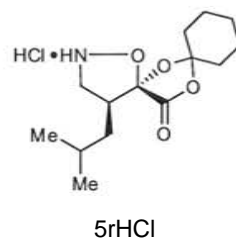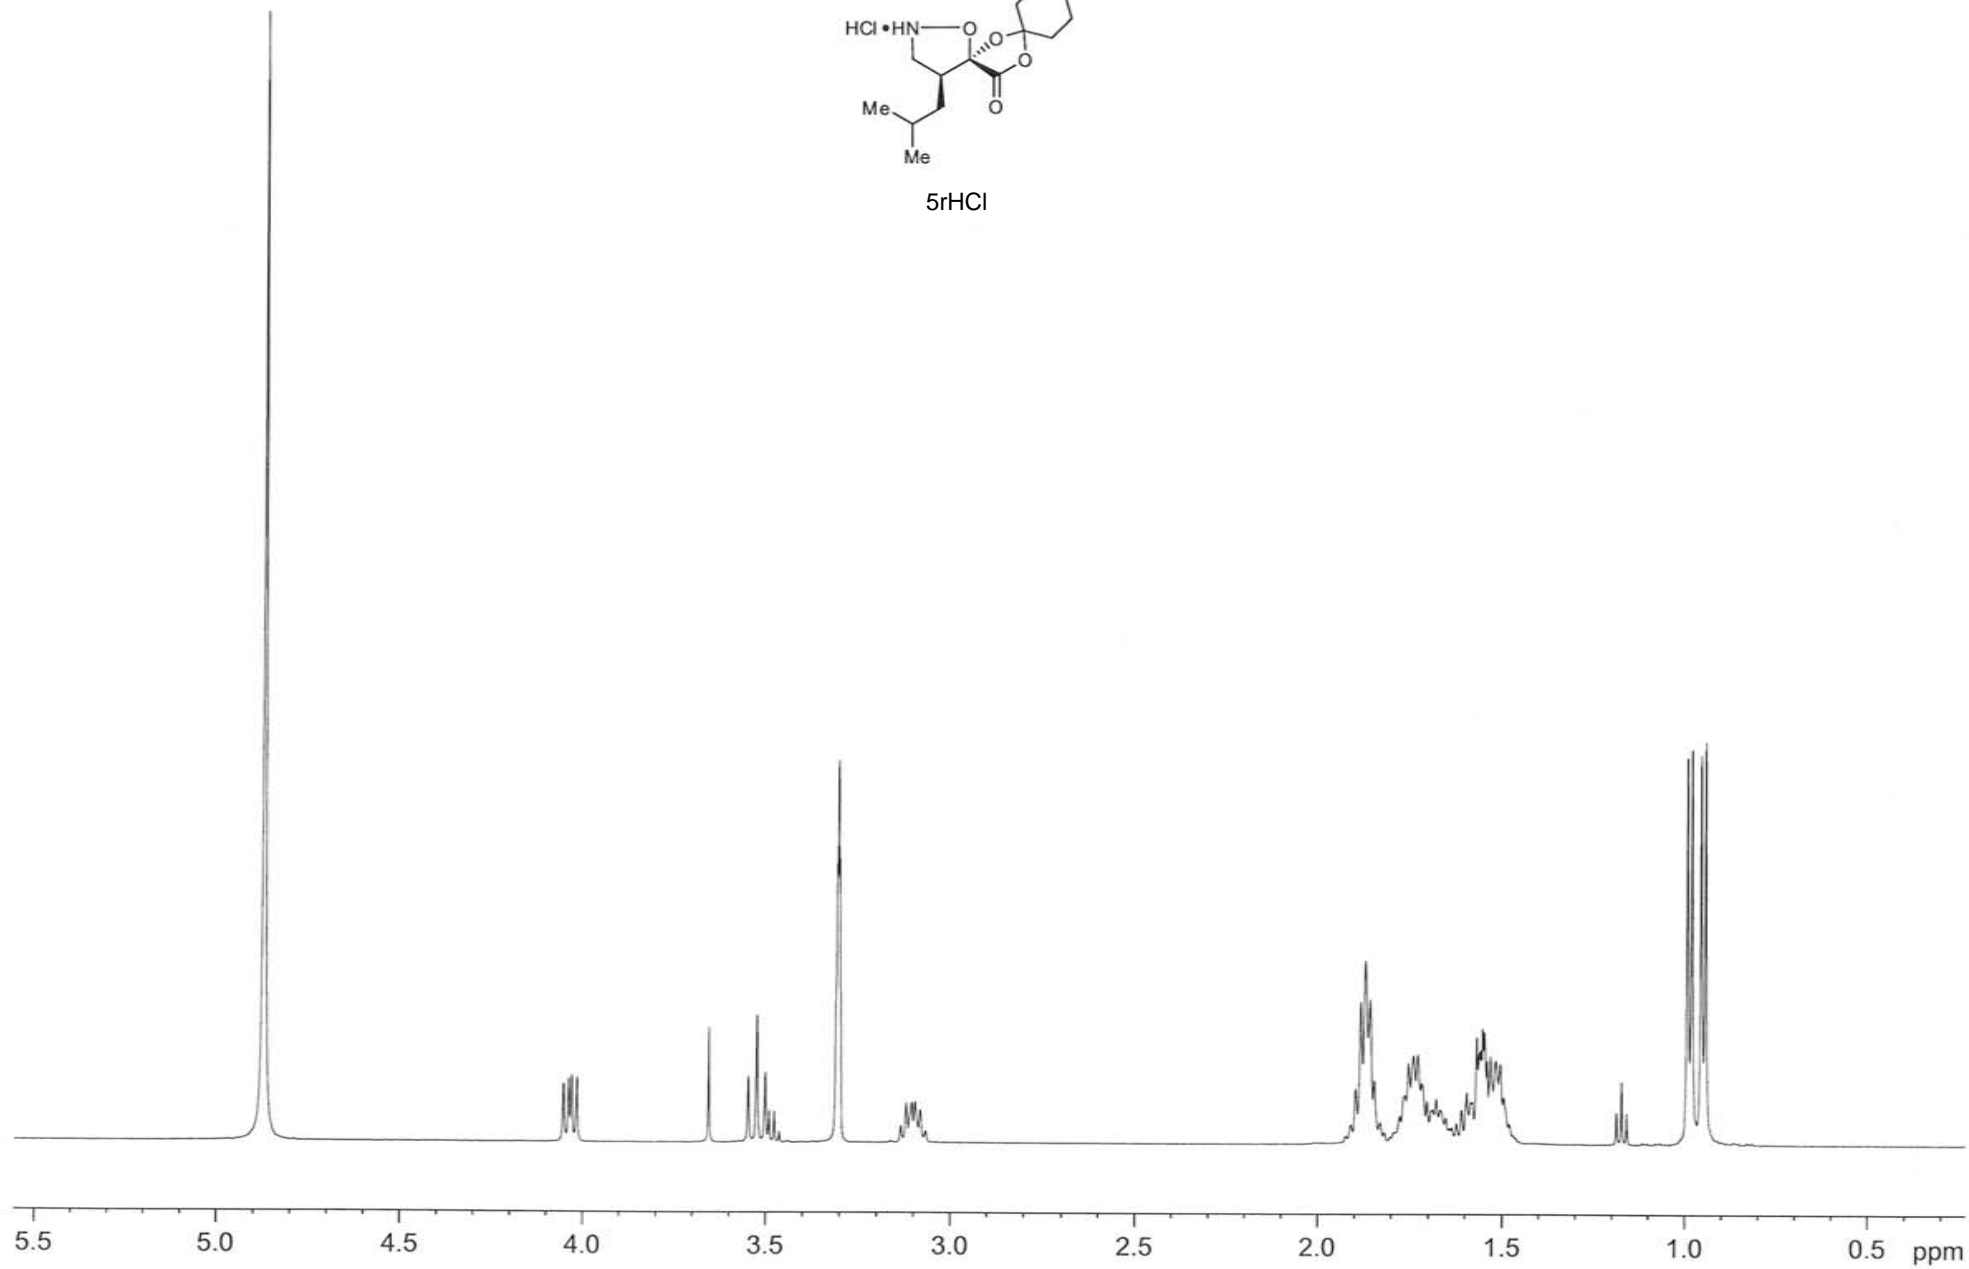

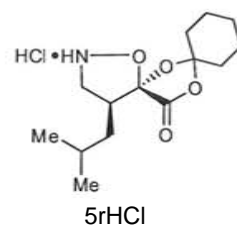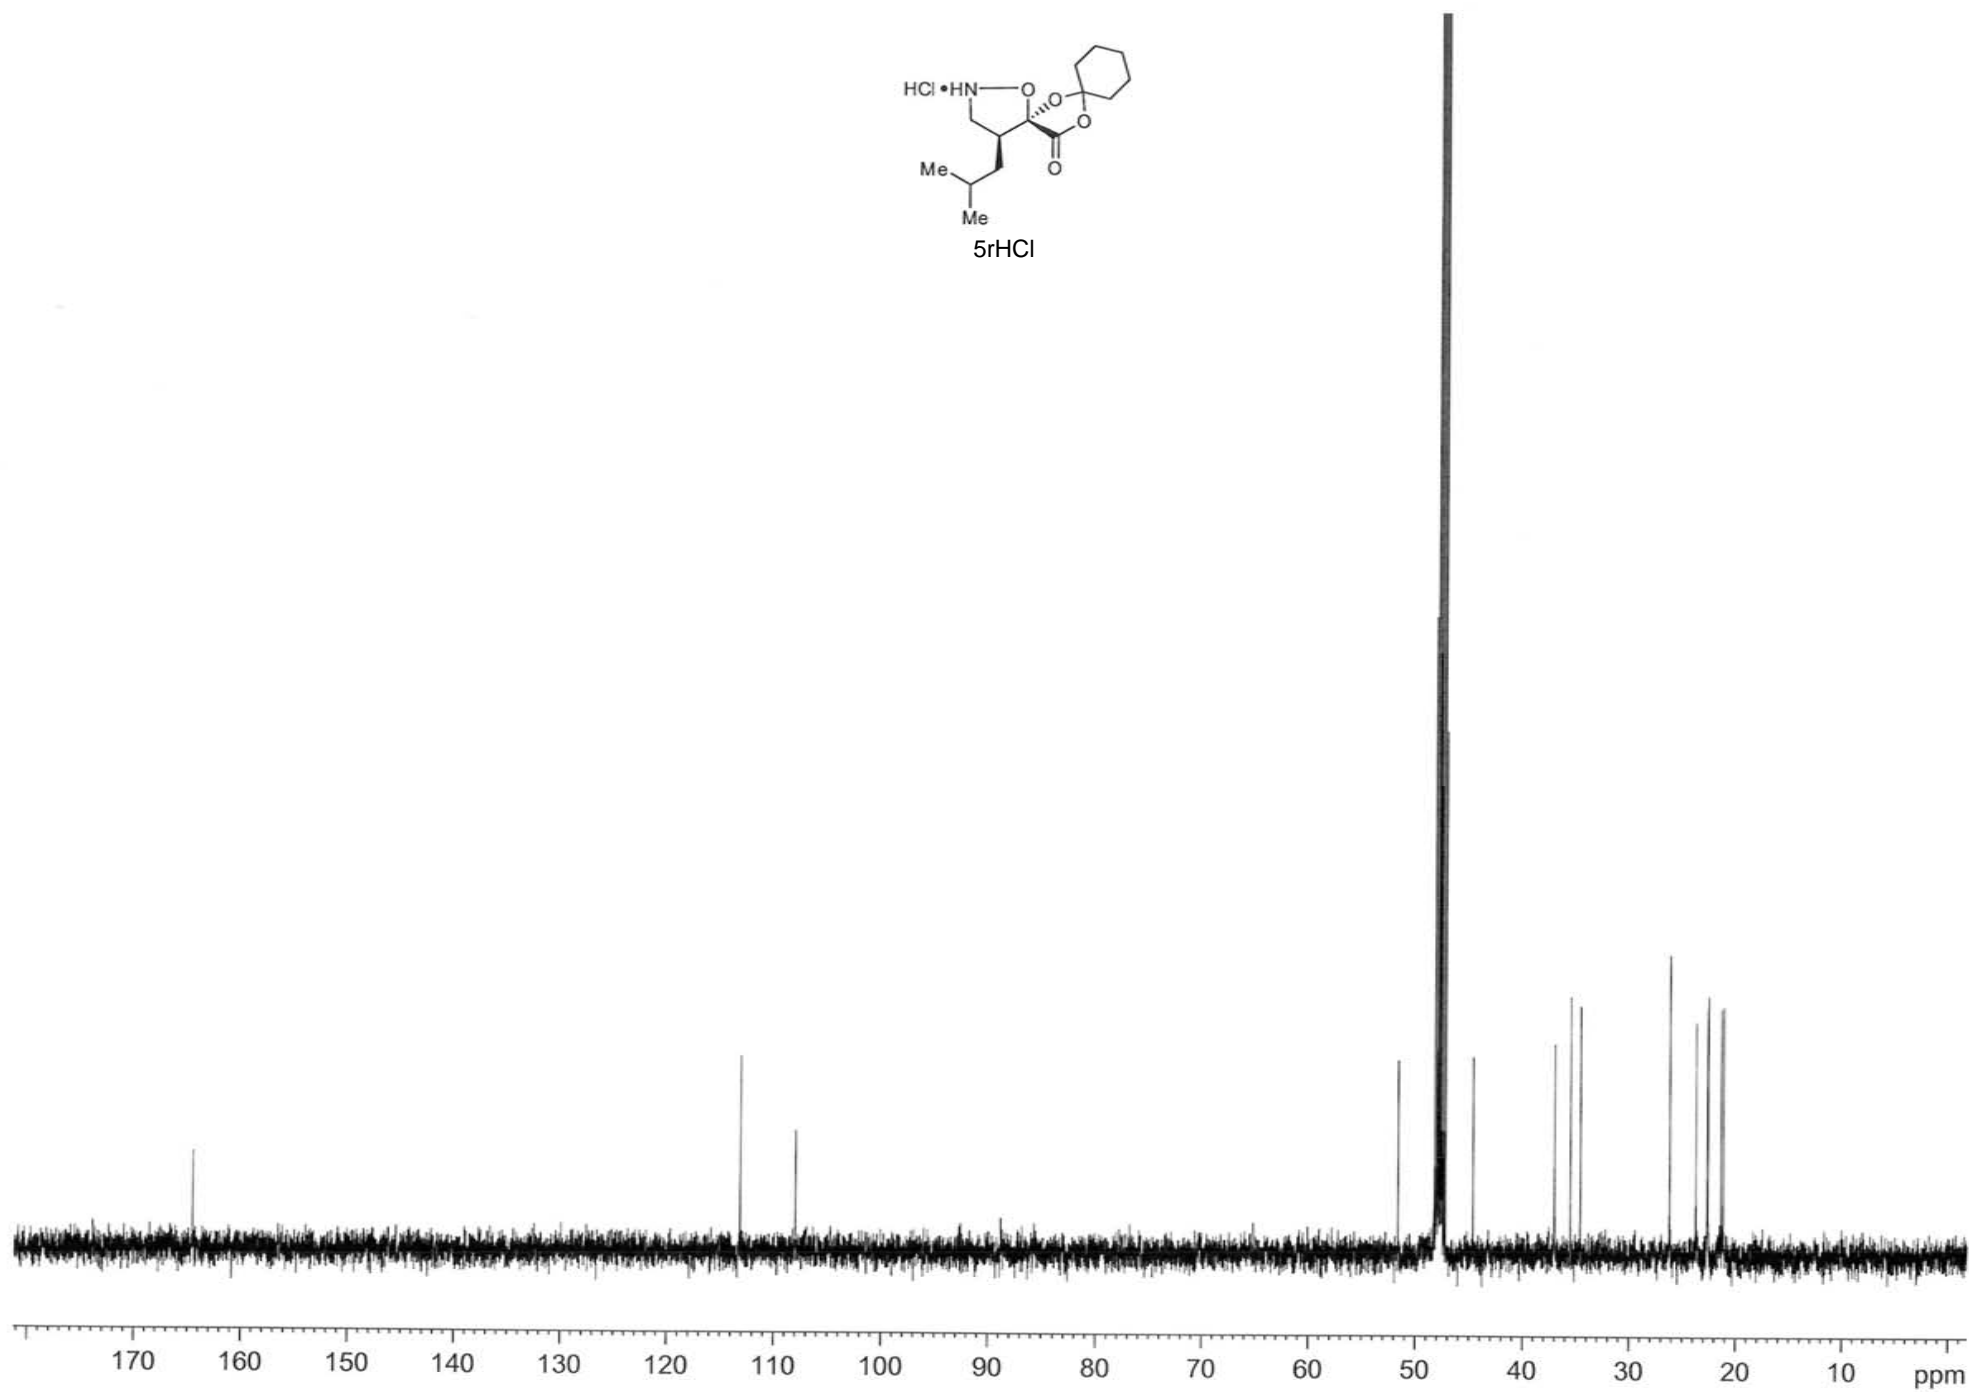

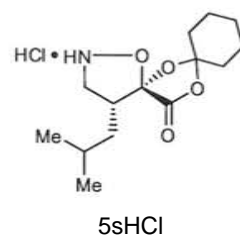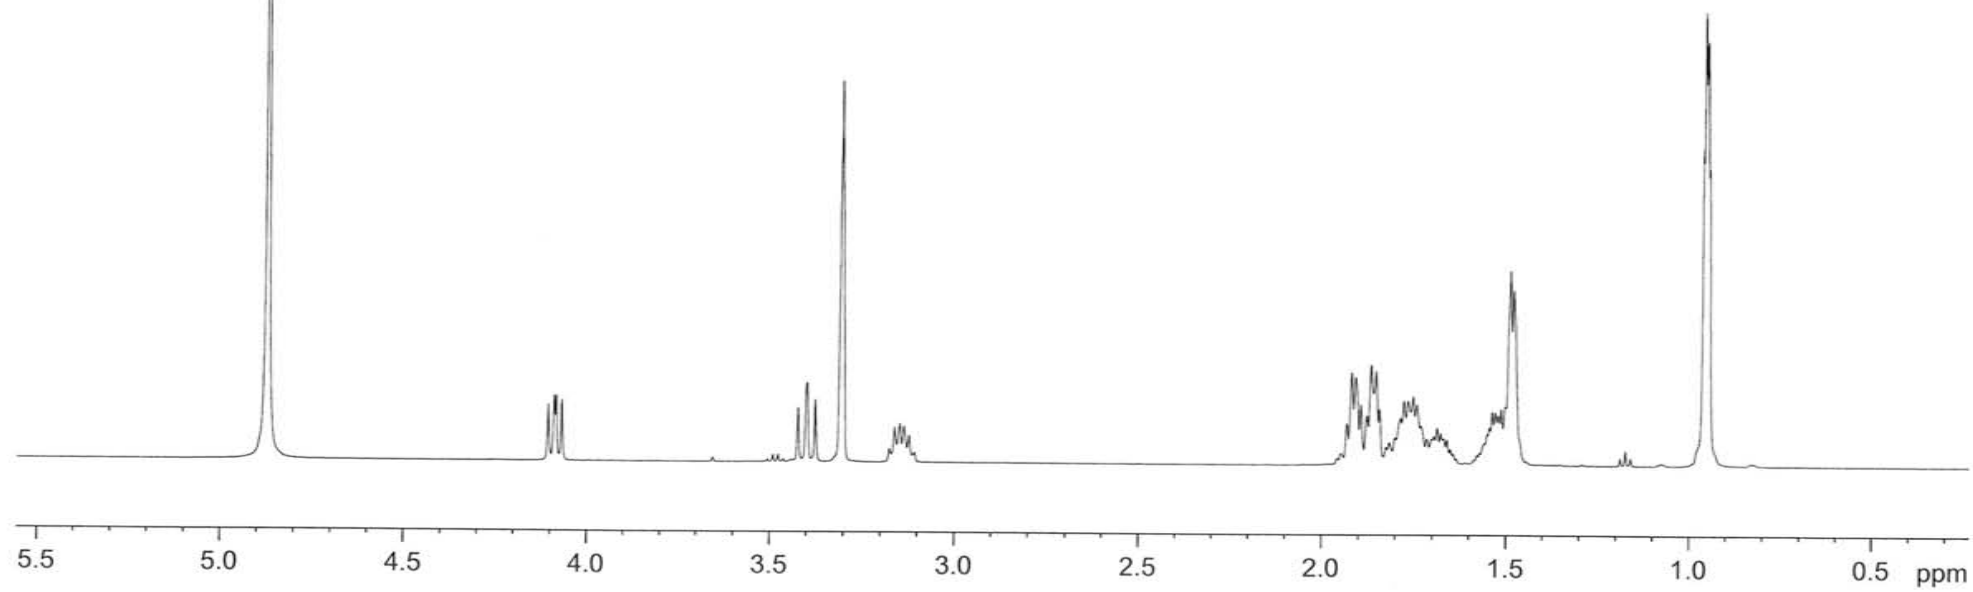

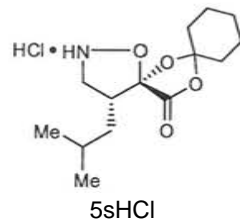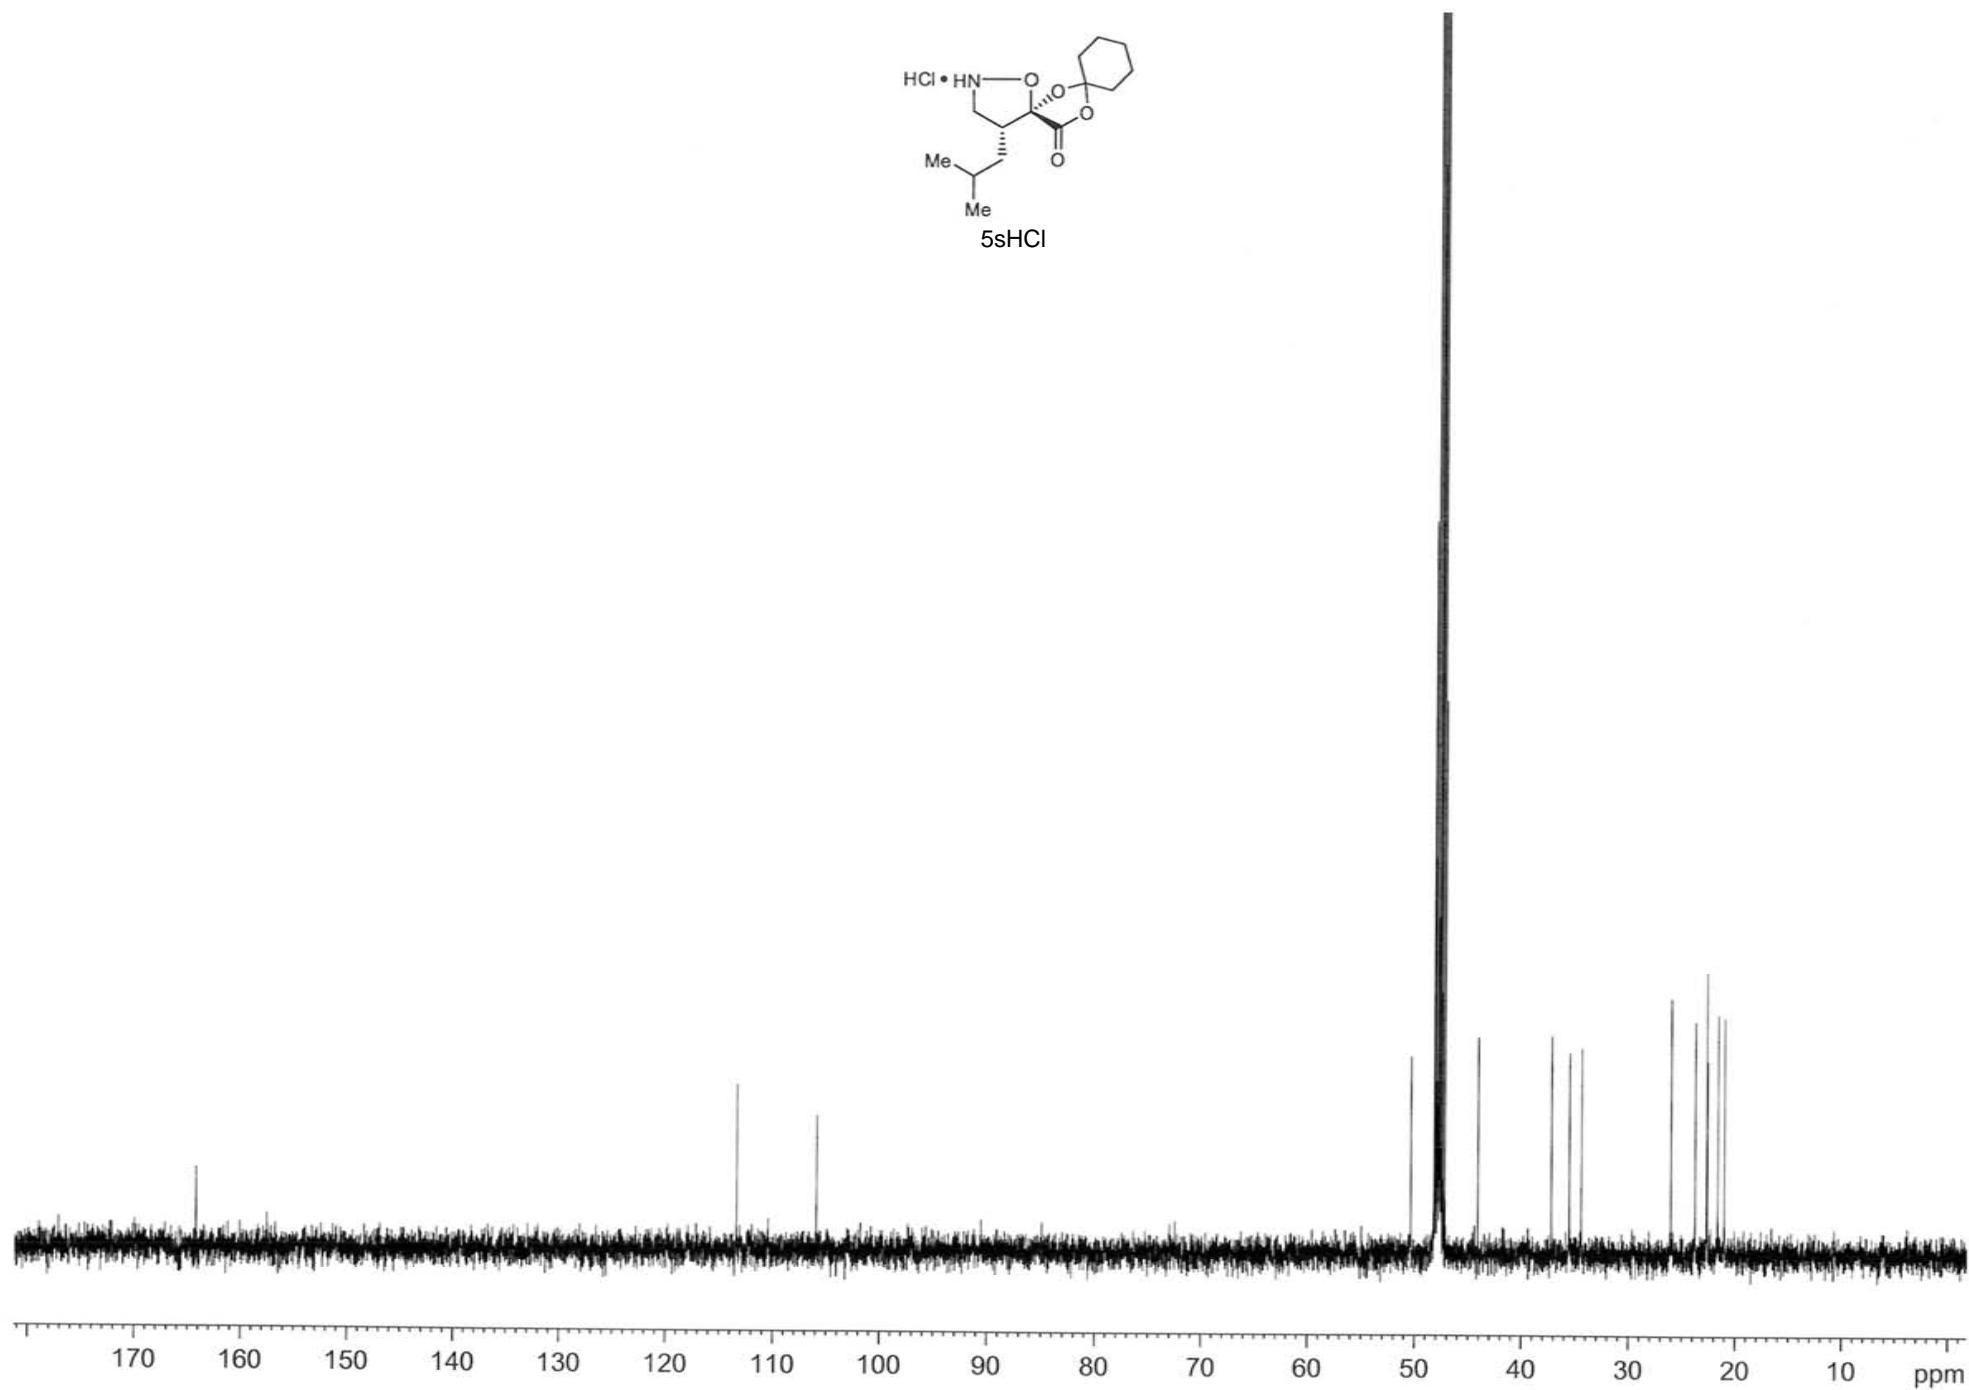

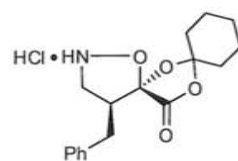

5tHCl

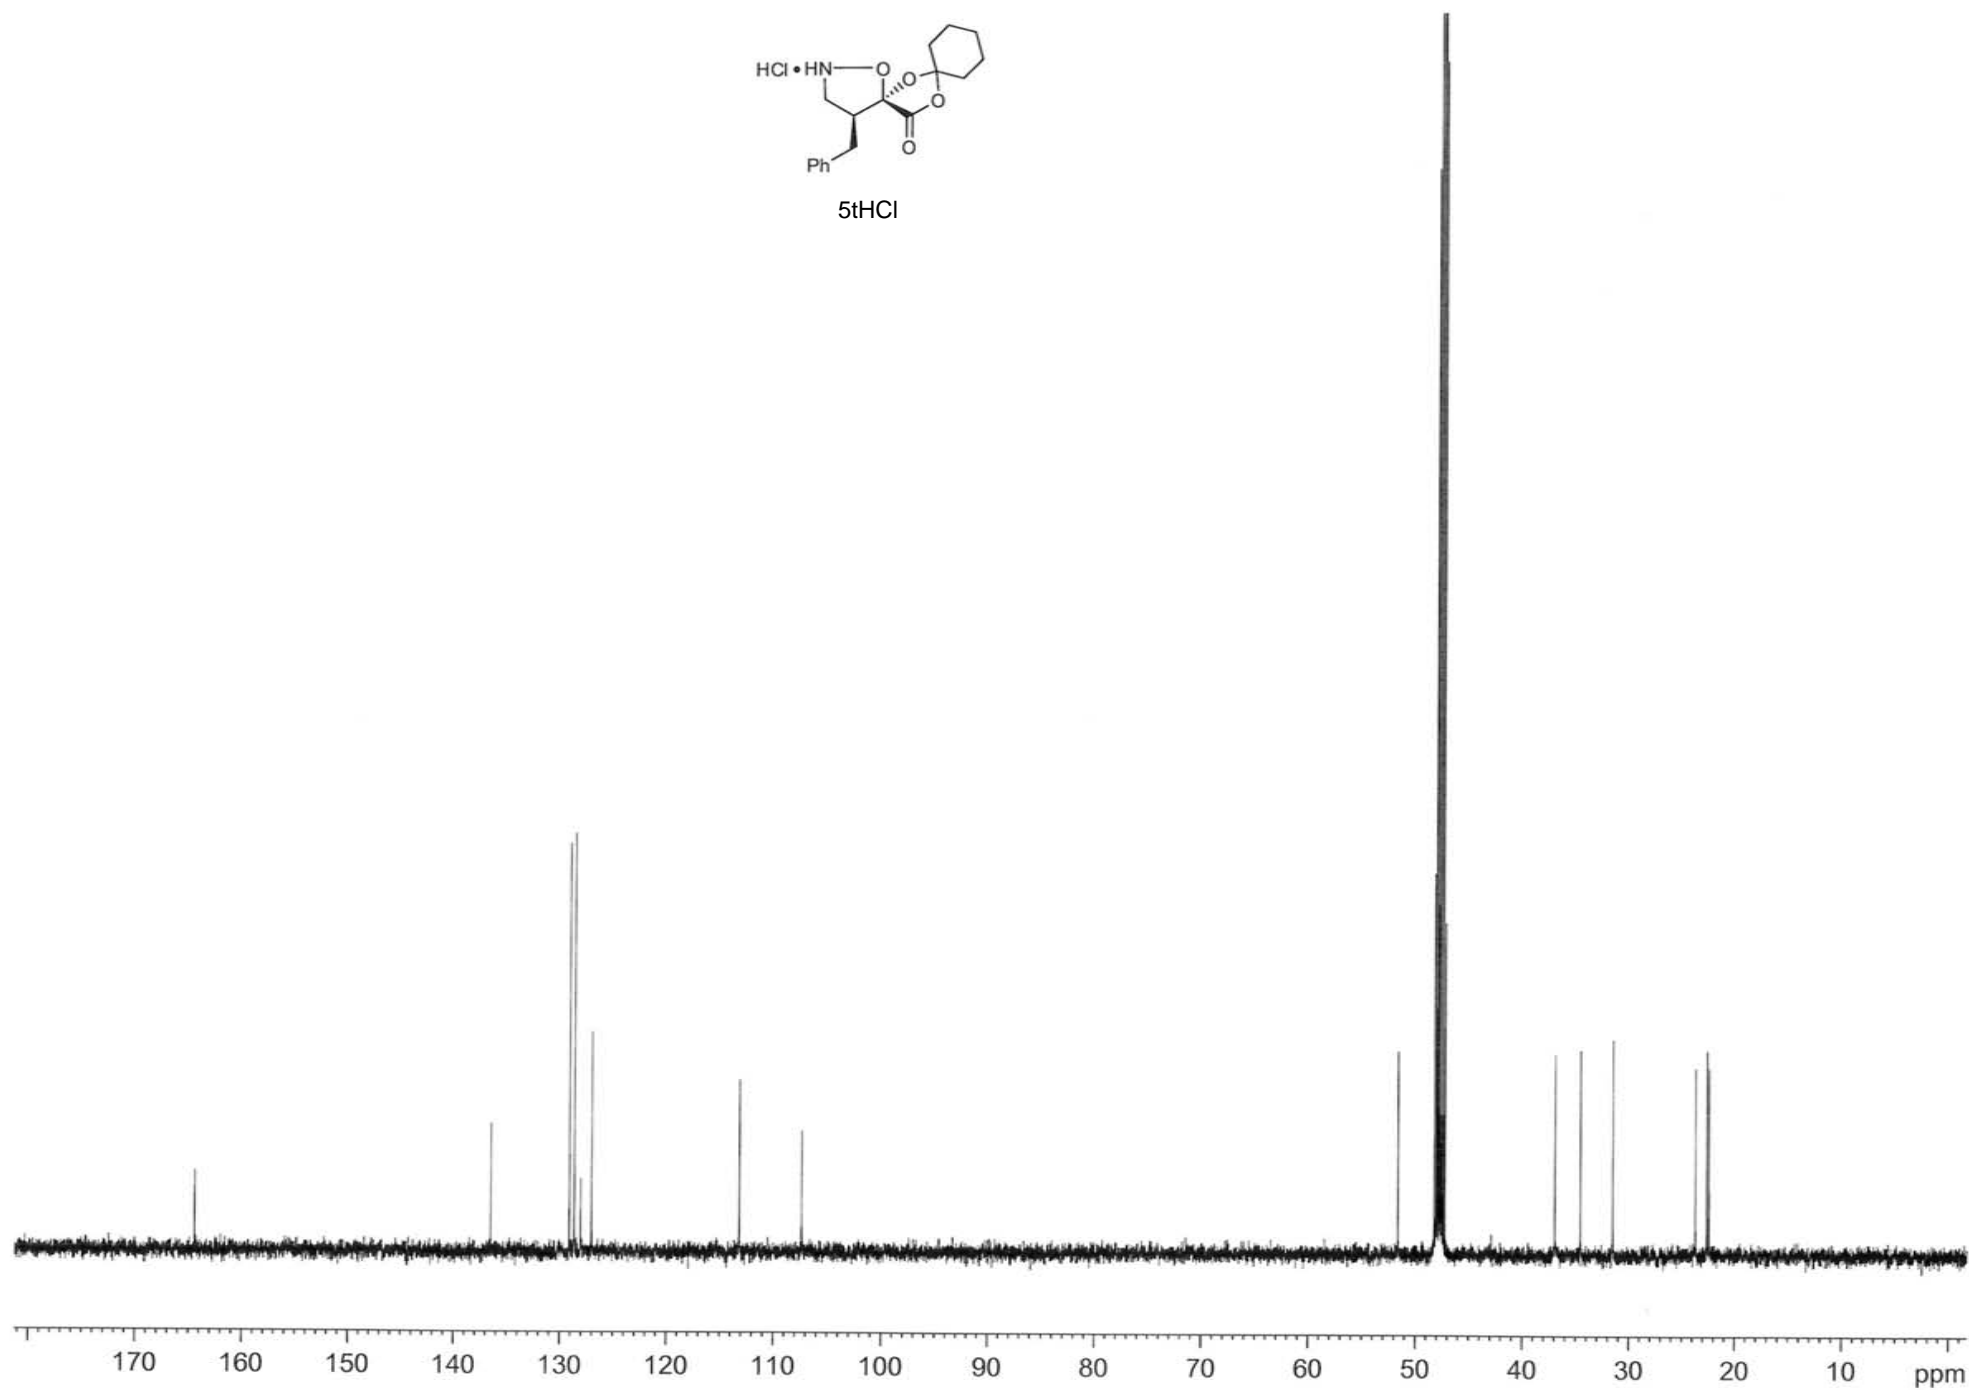

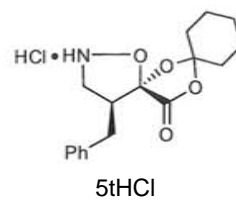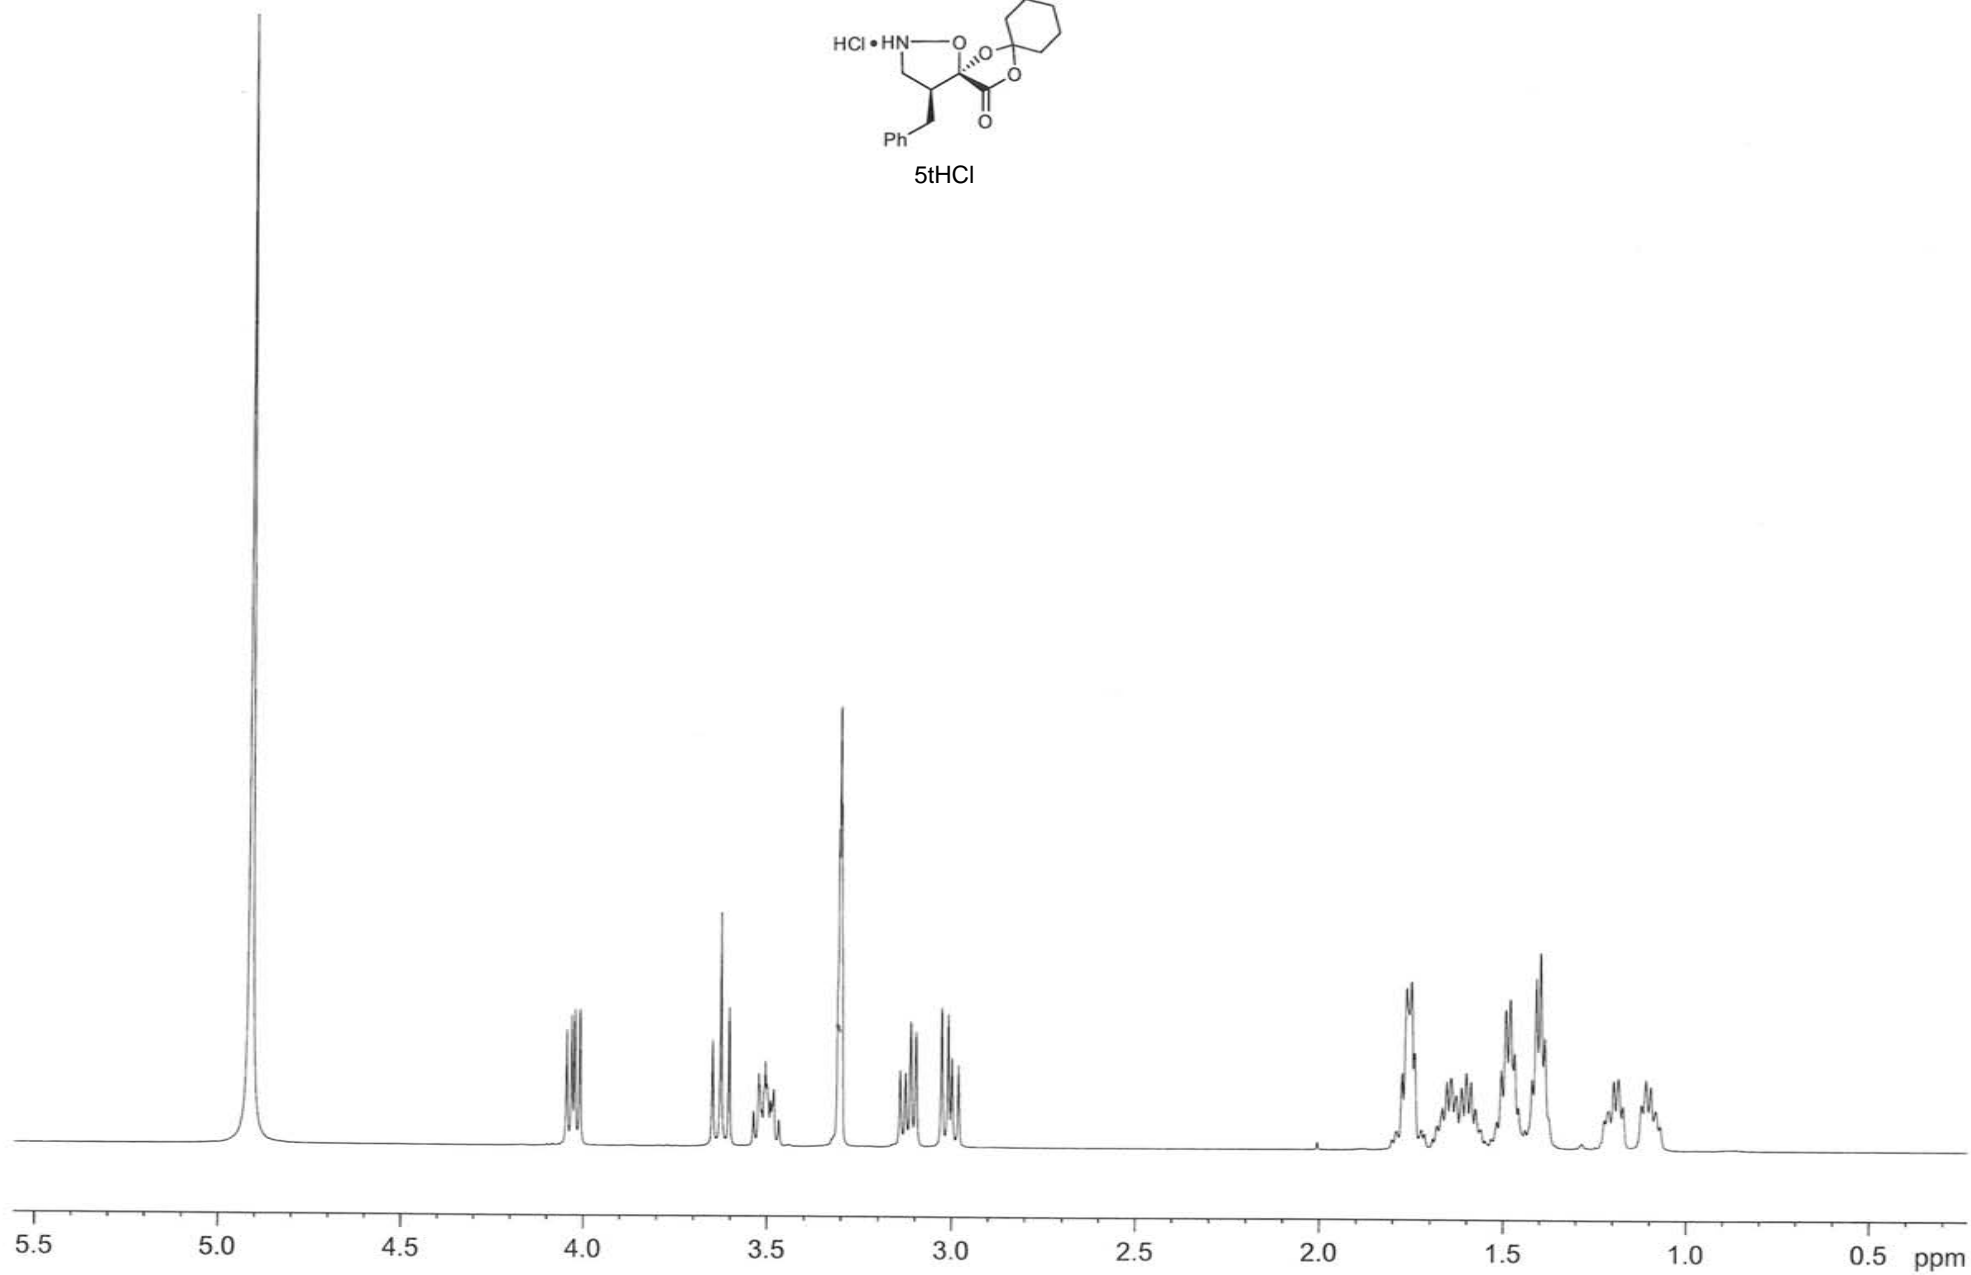



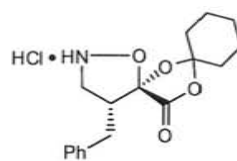

5uHCl

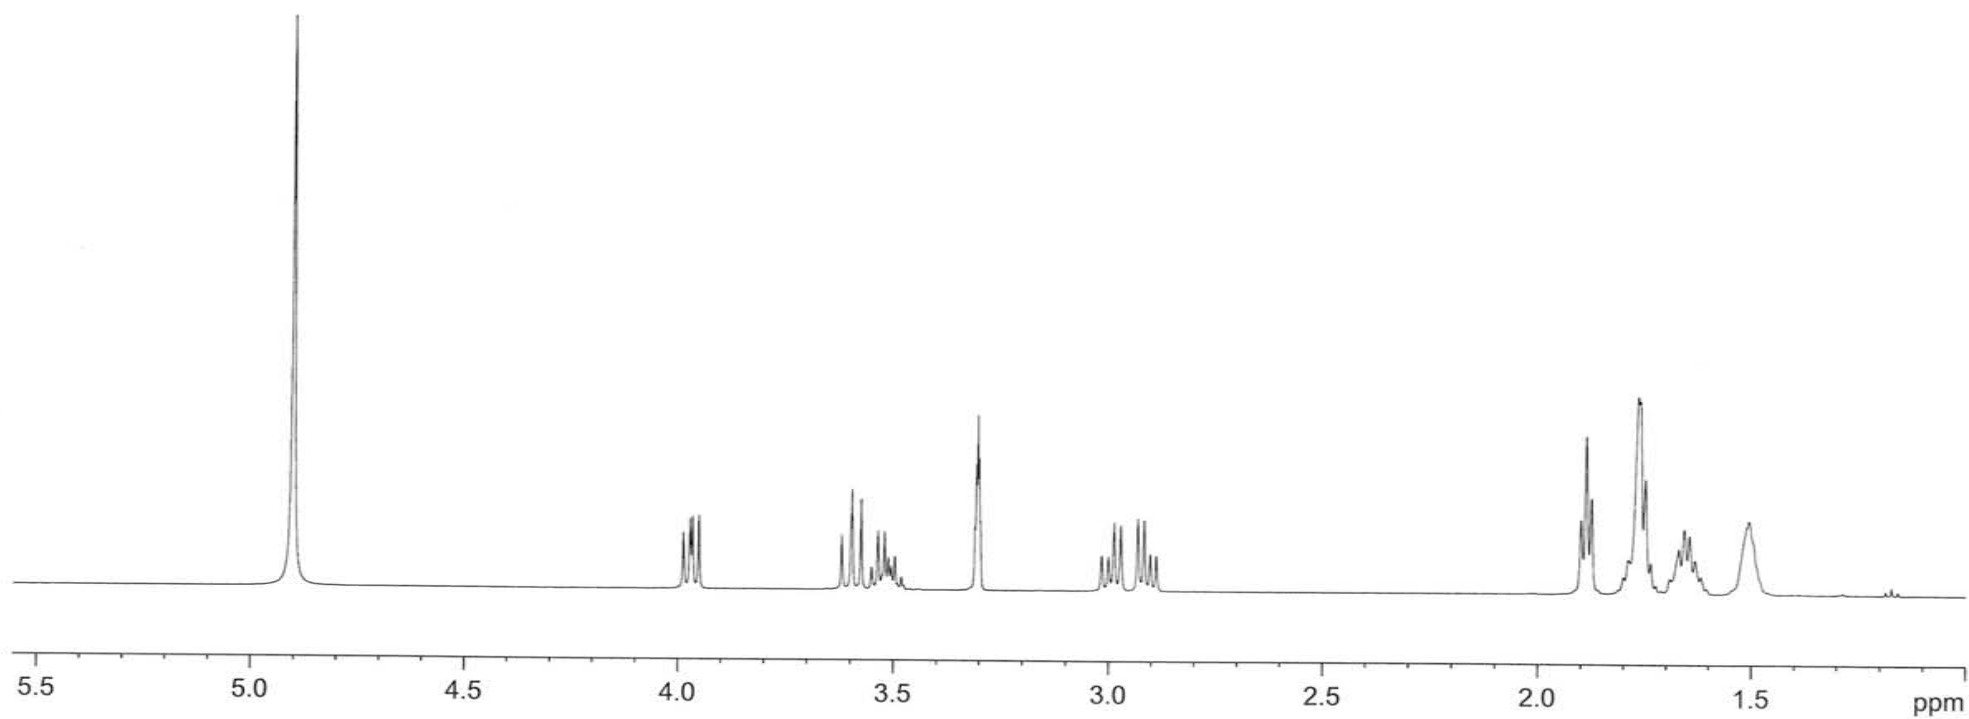

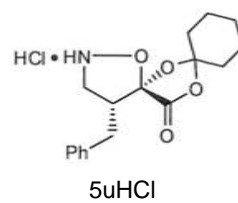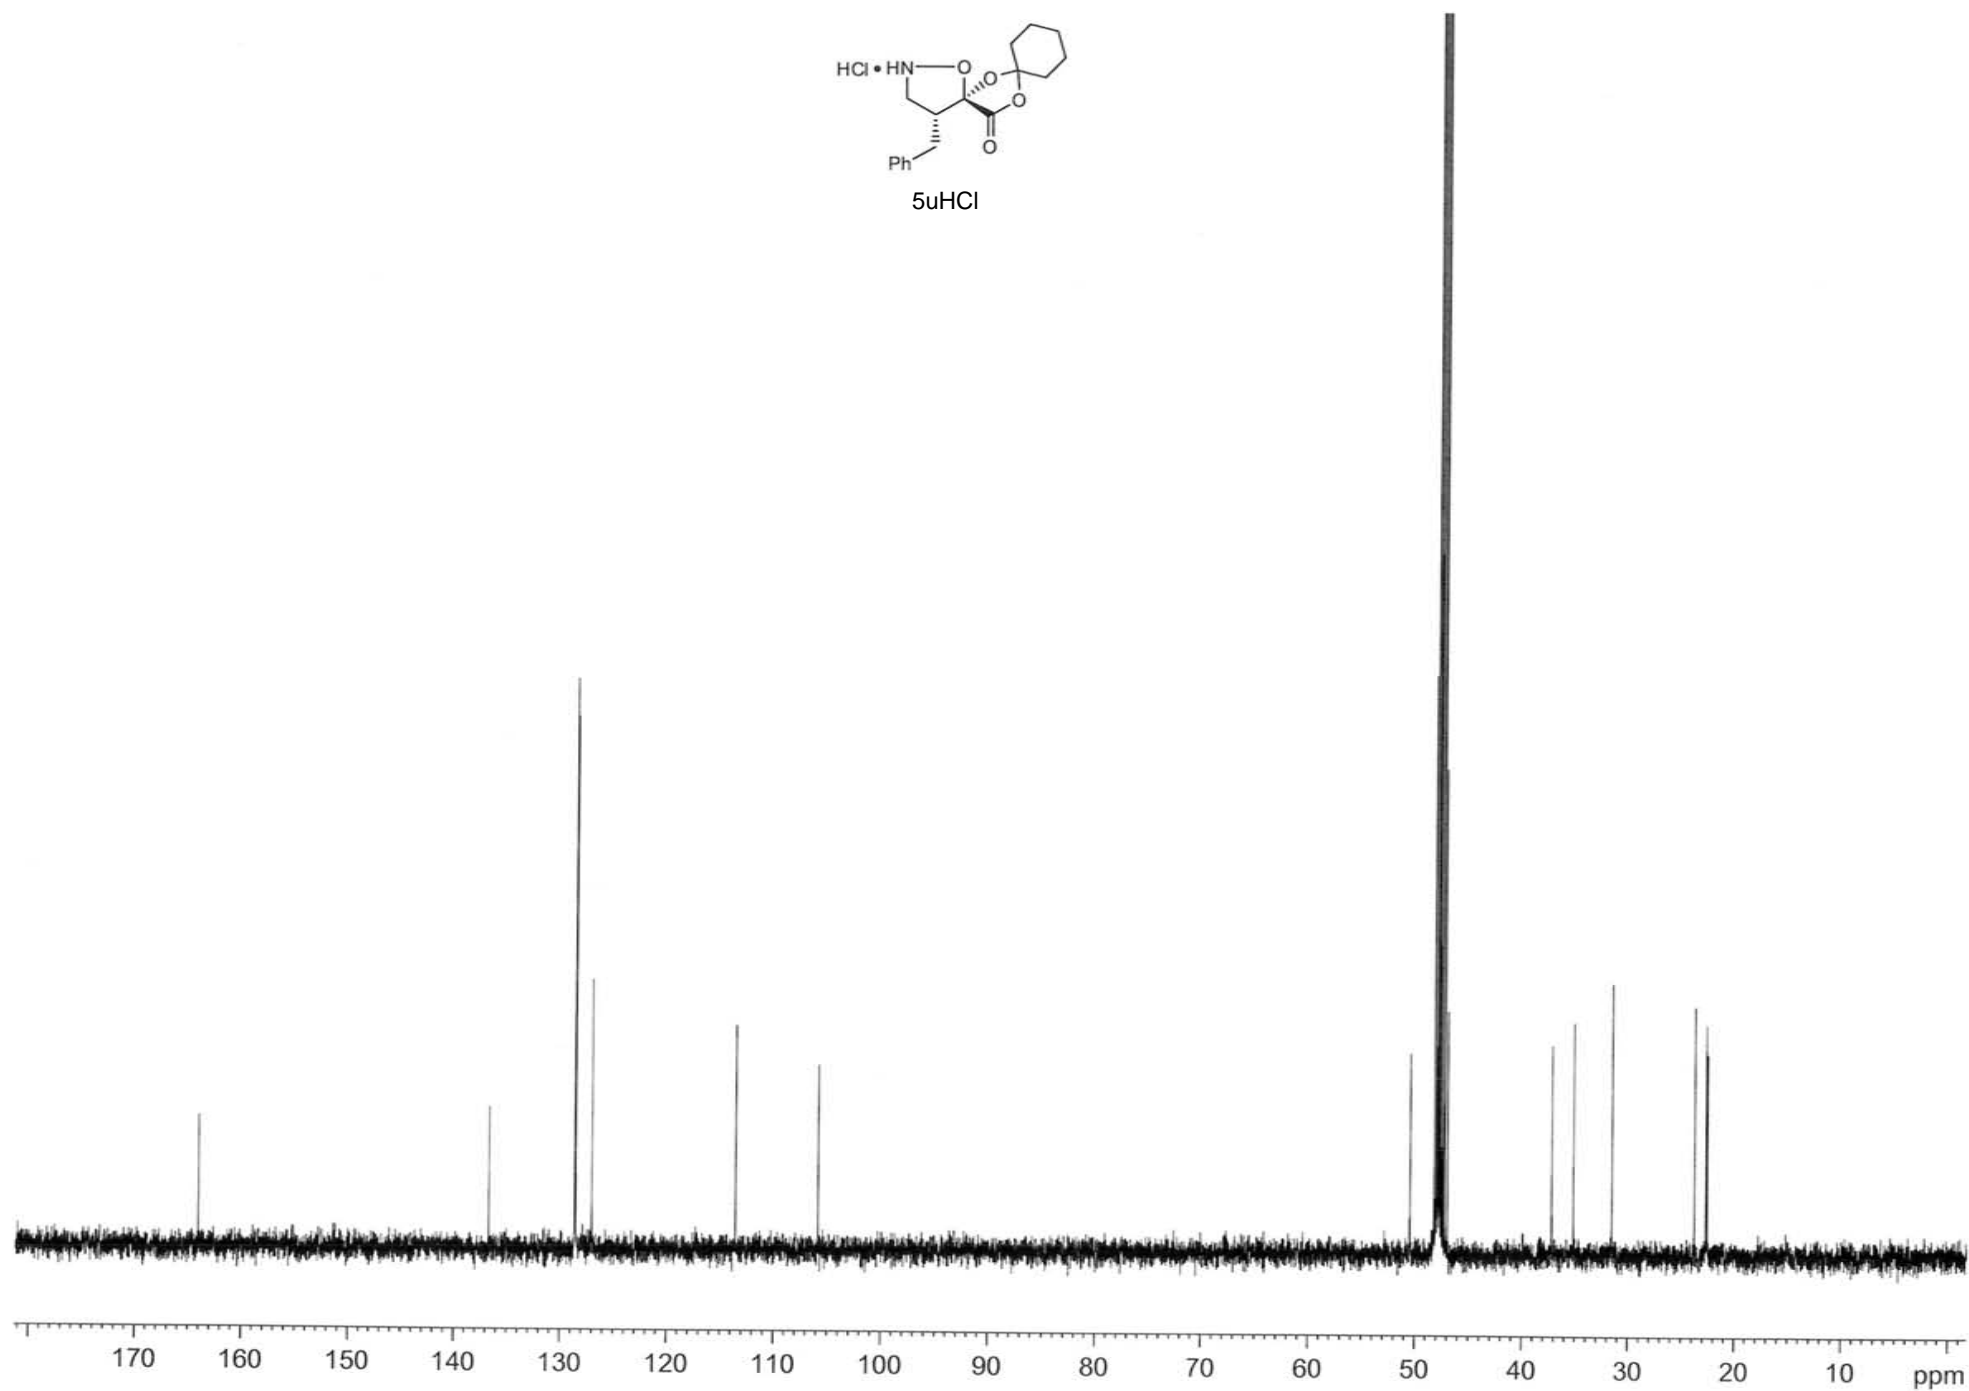

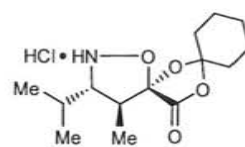

5vHCl

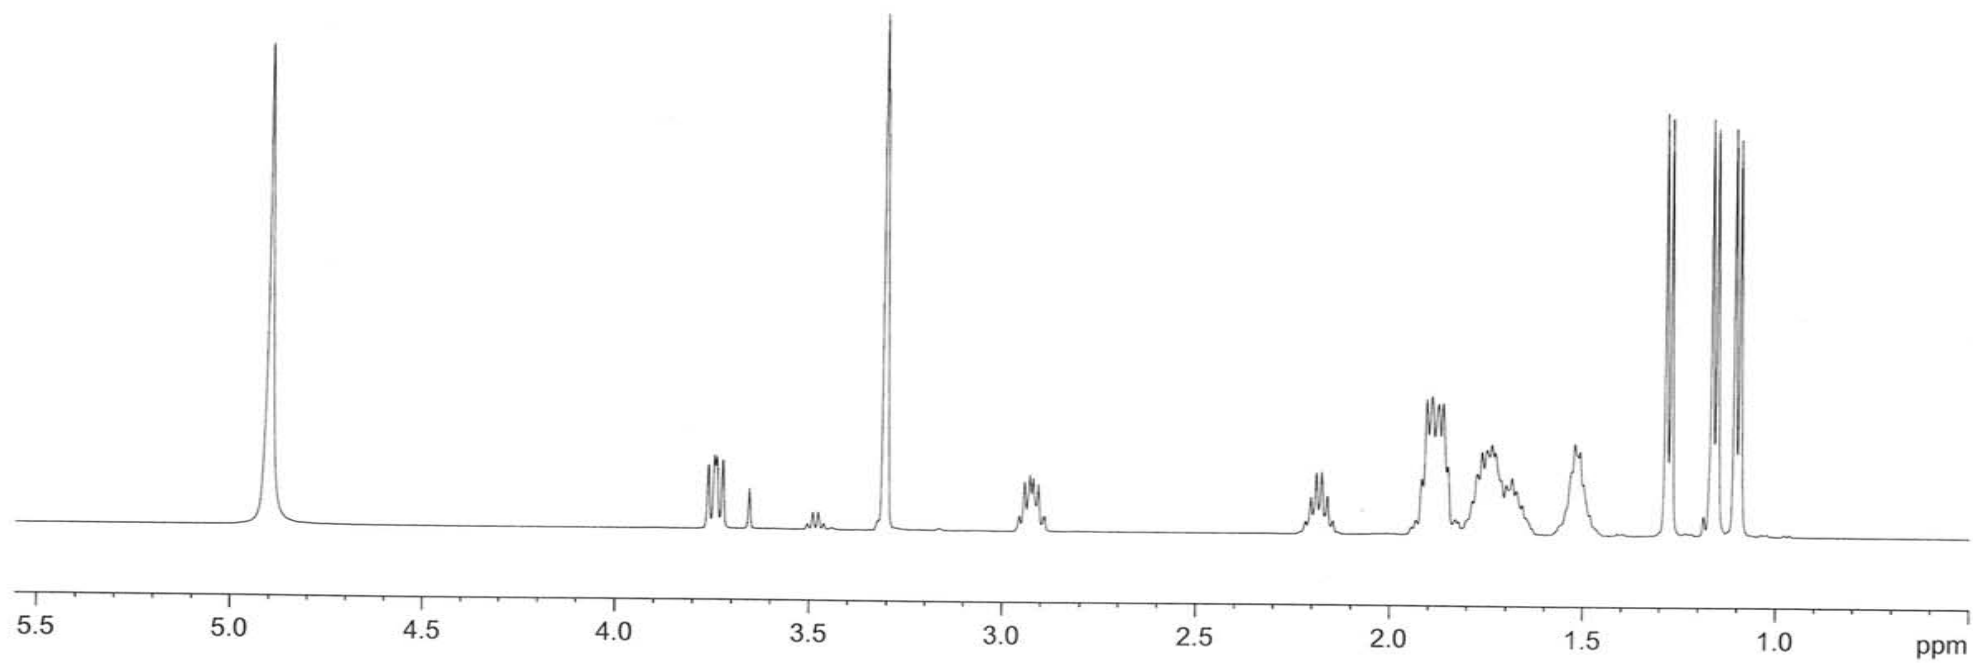

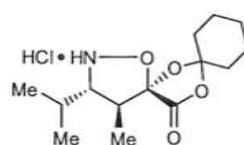

5vHCl

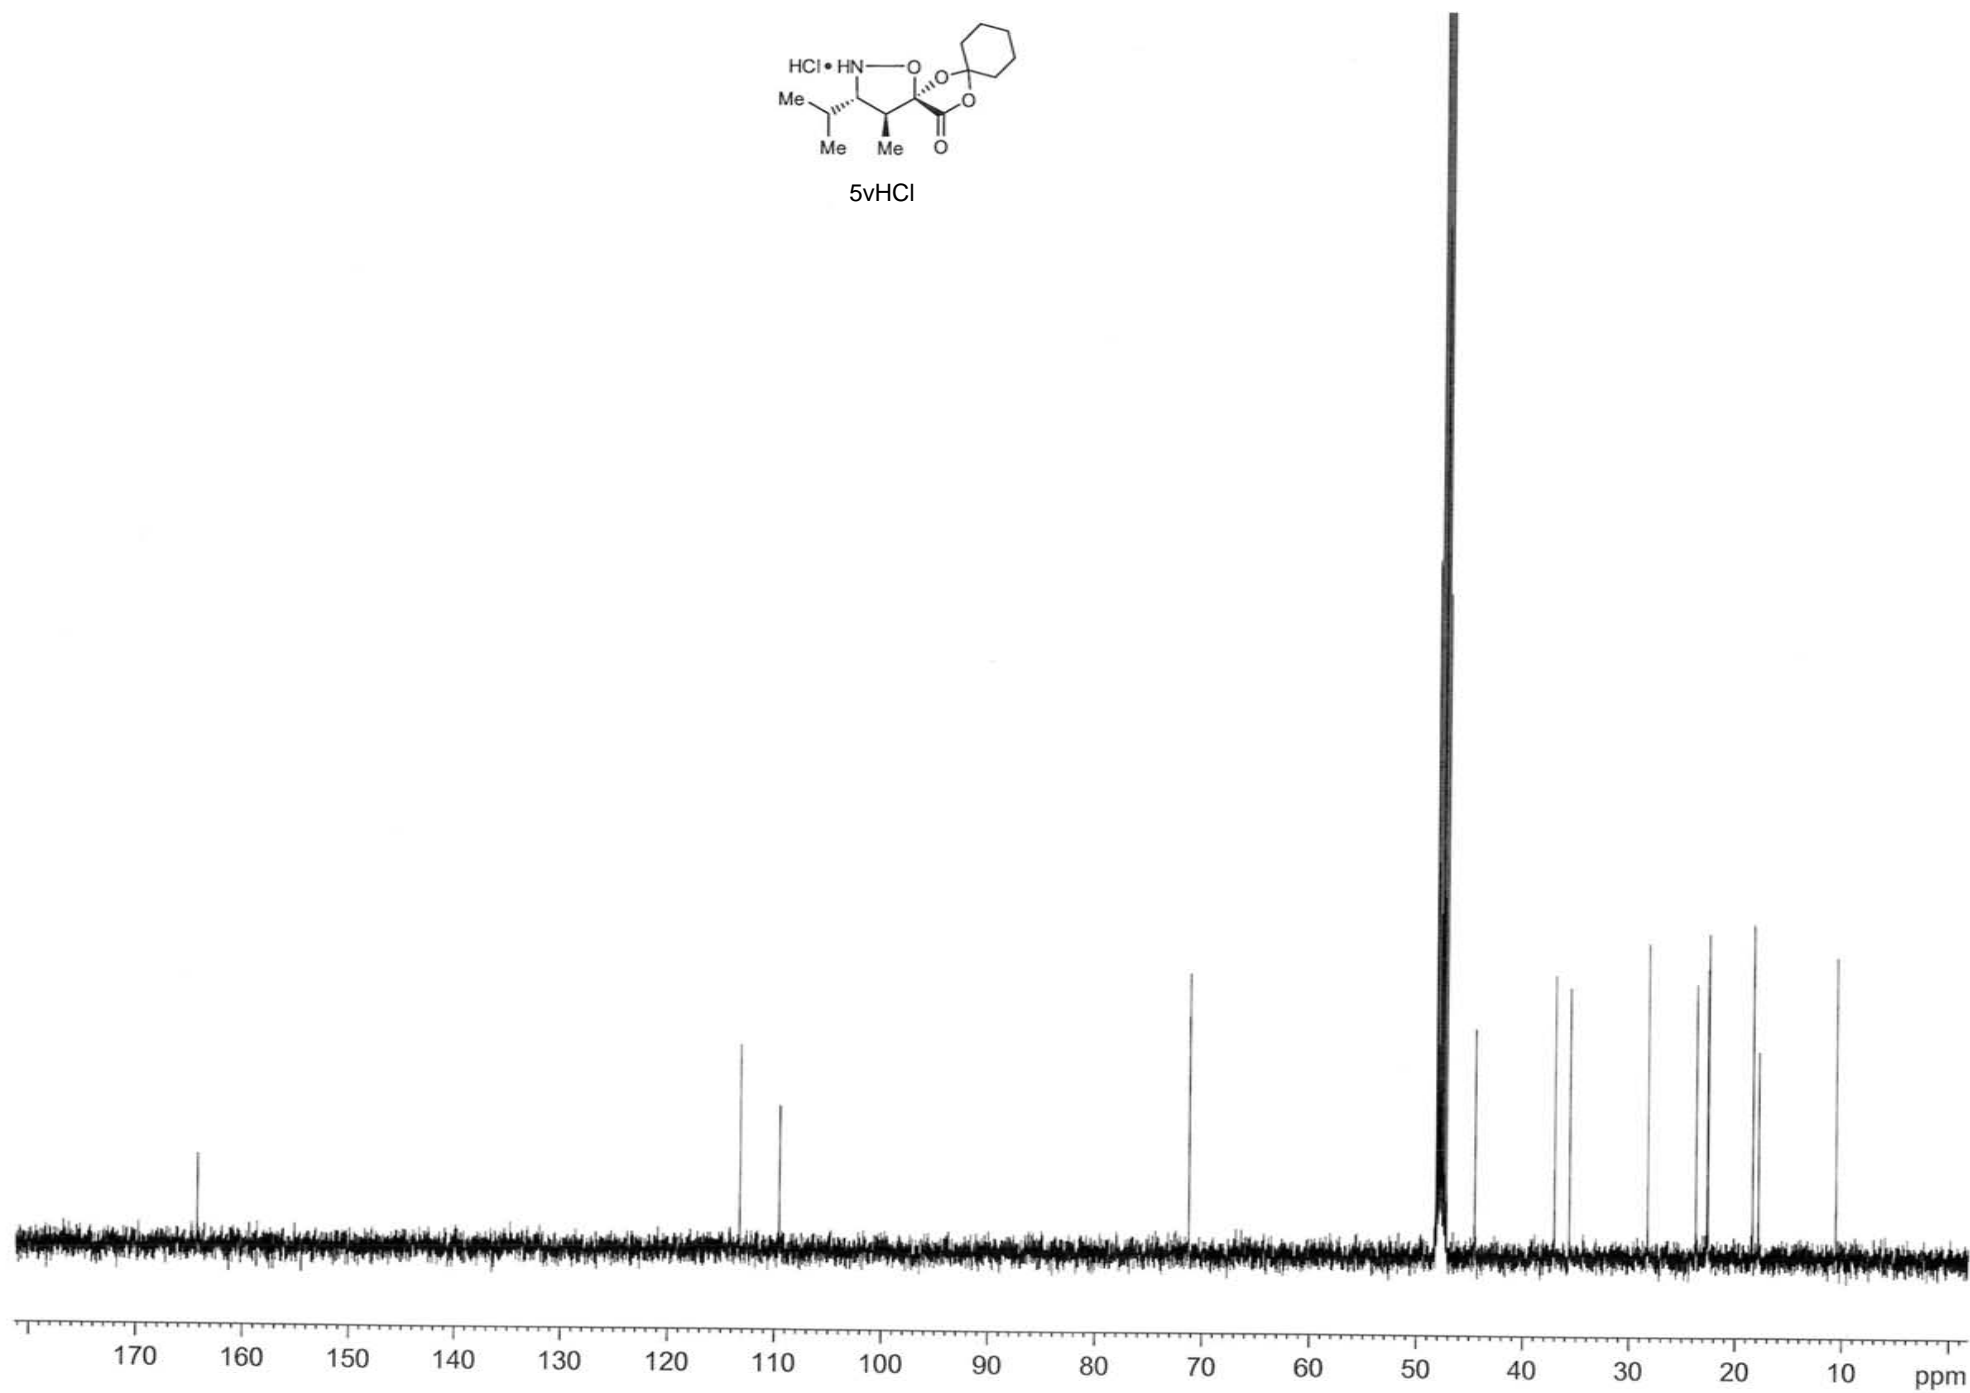

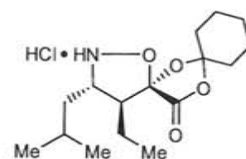

5wHCl

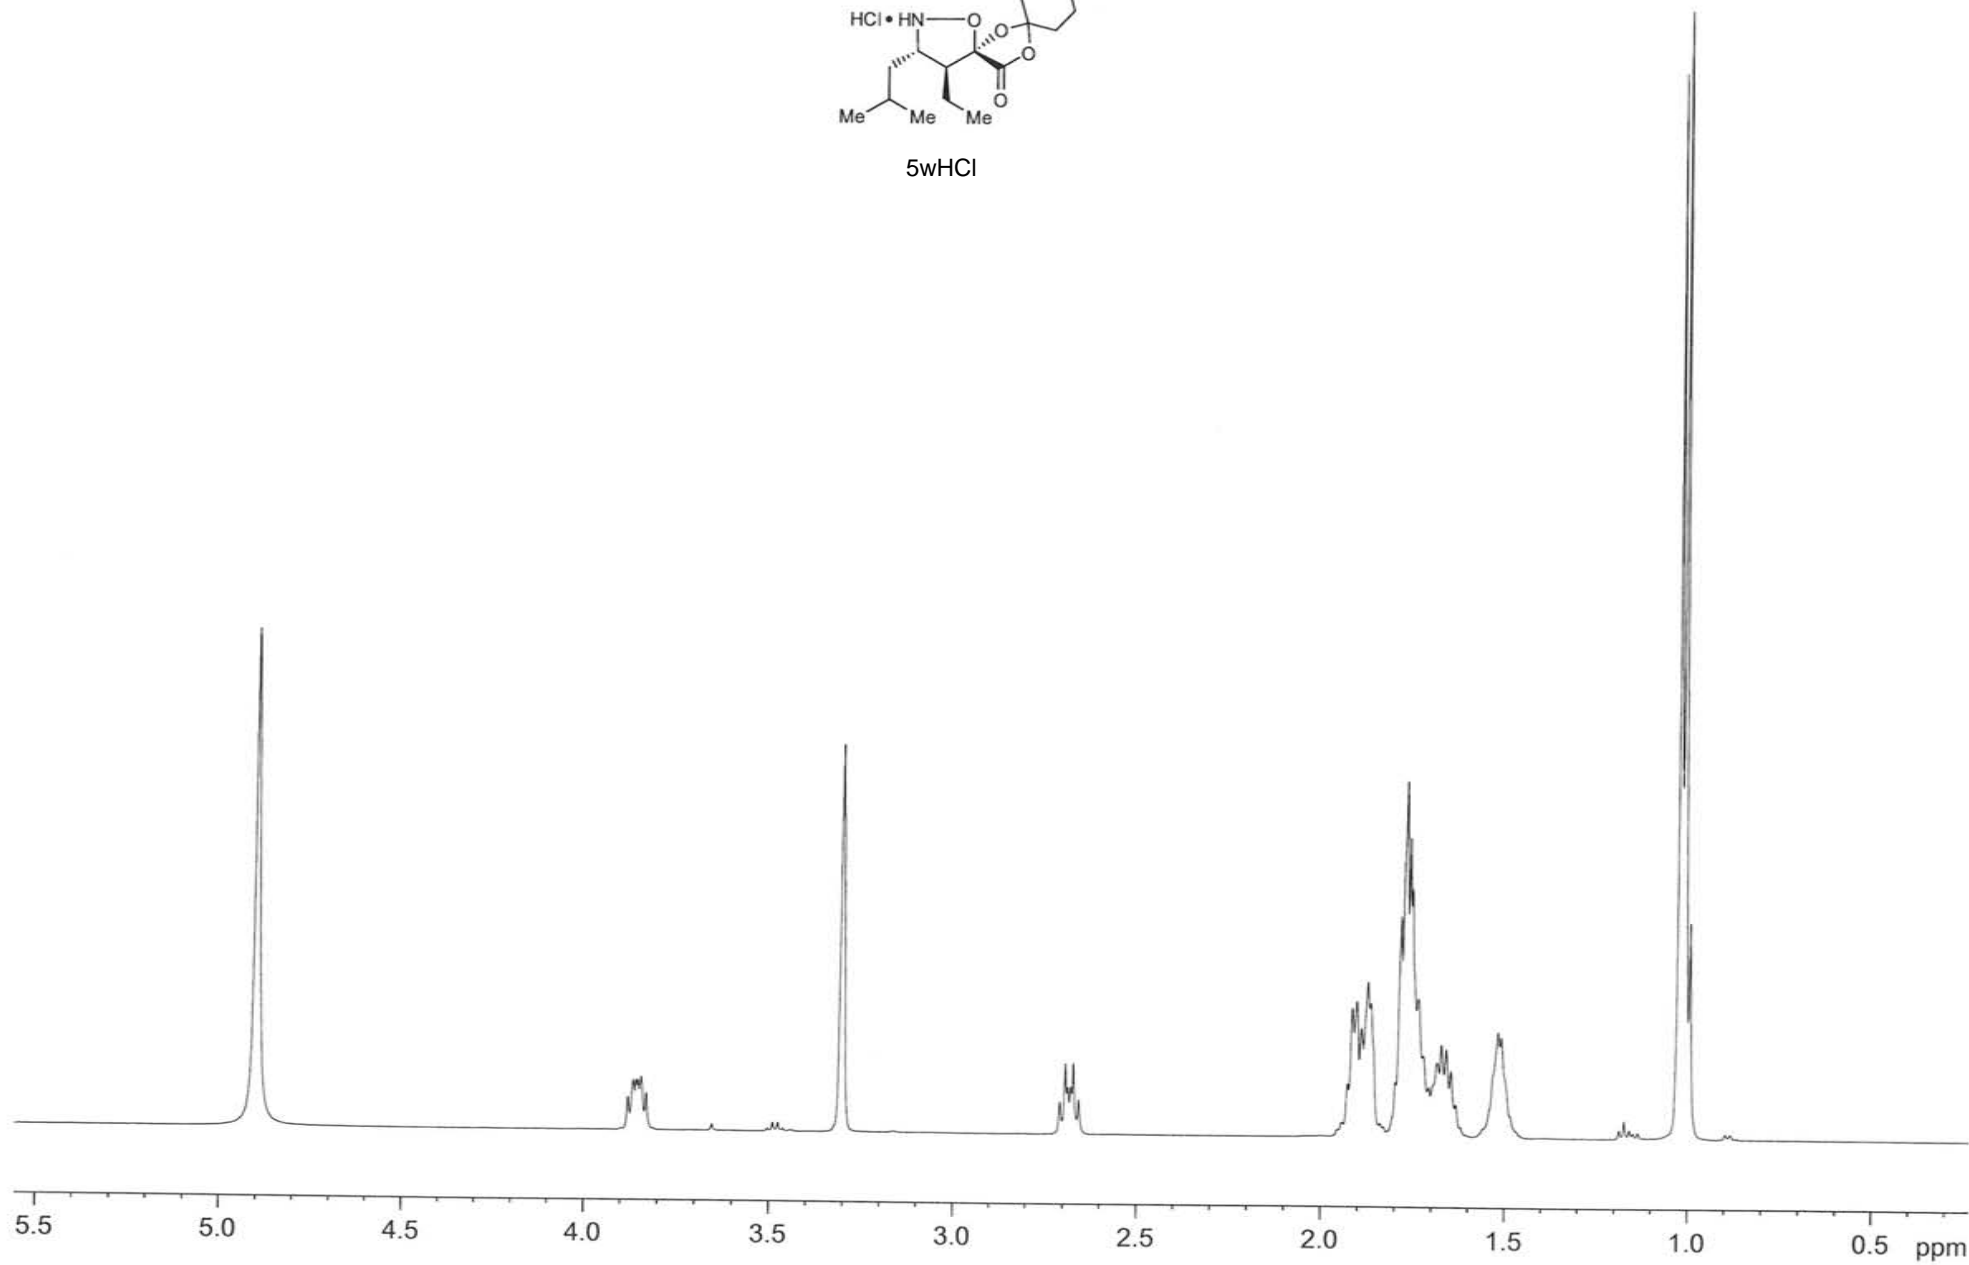

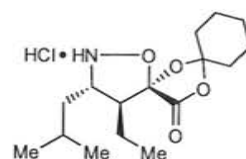

5wHCl

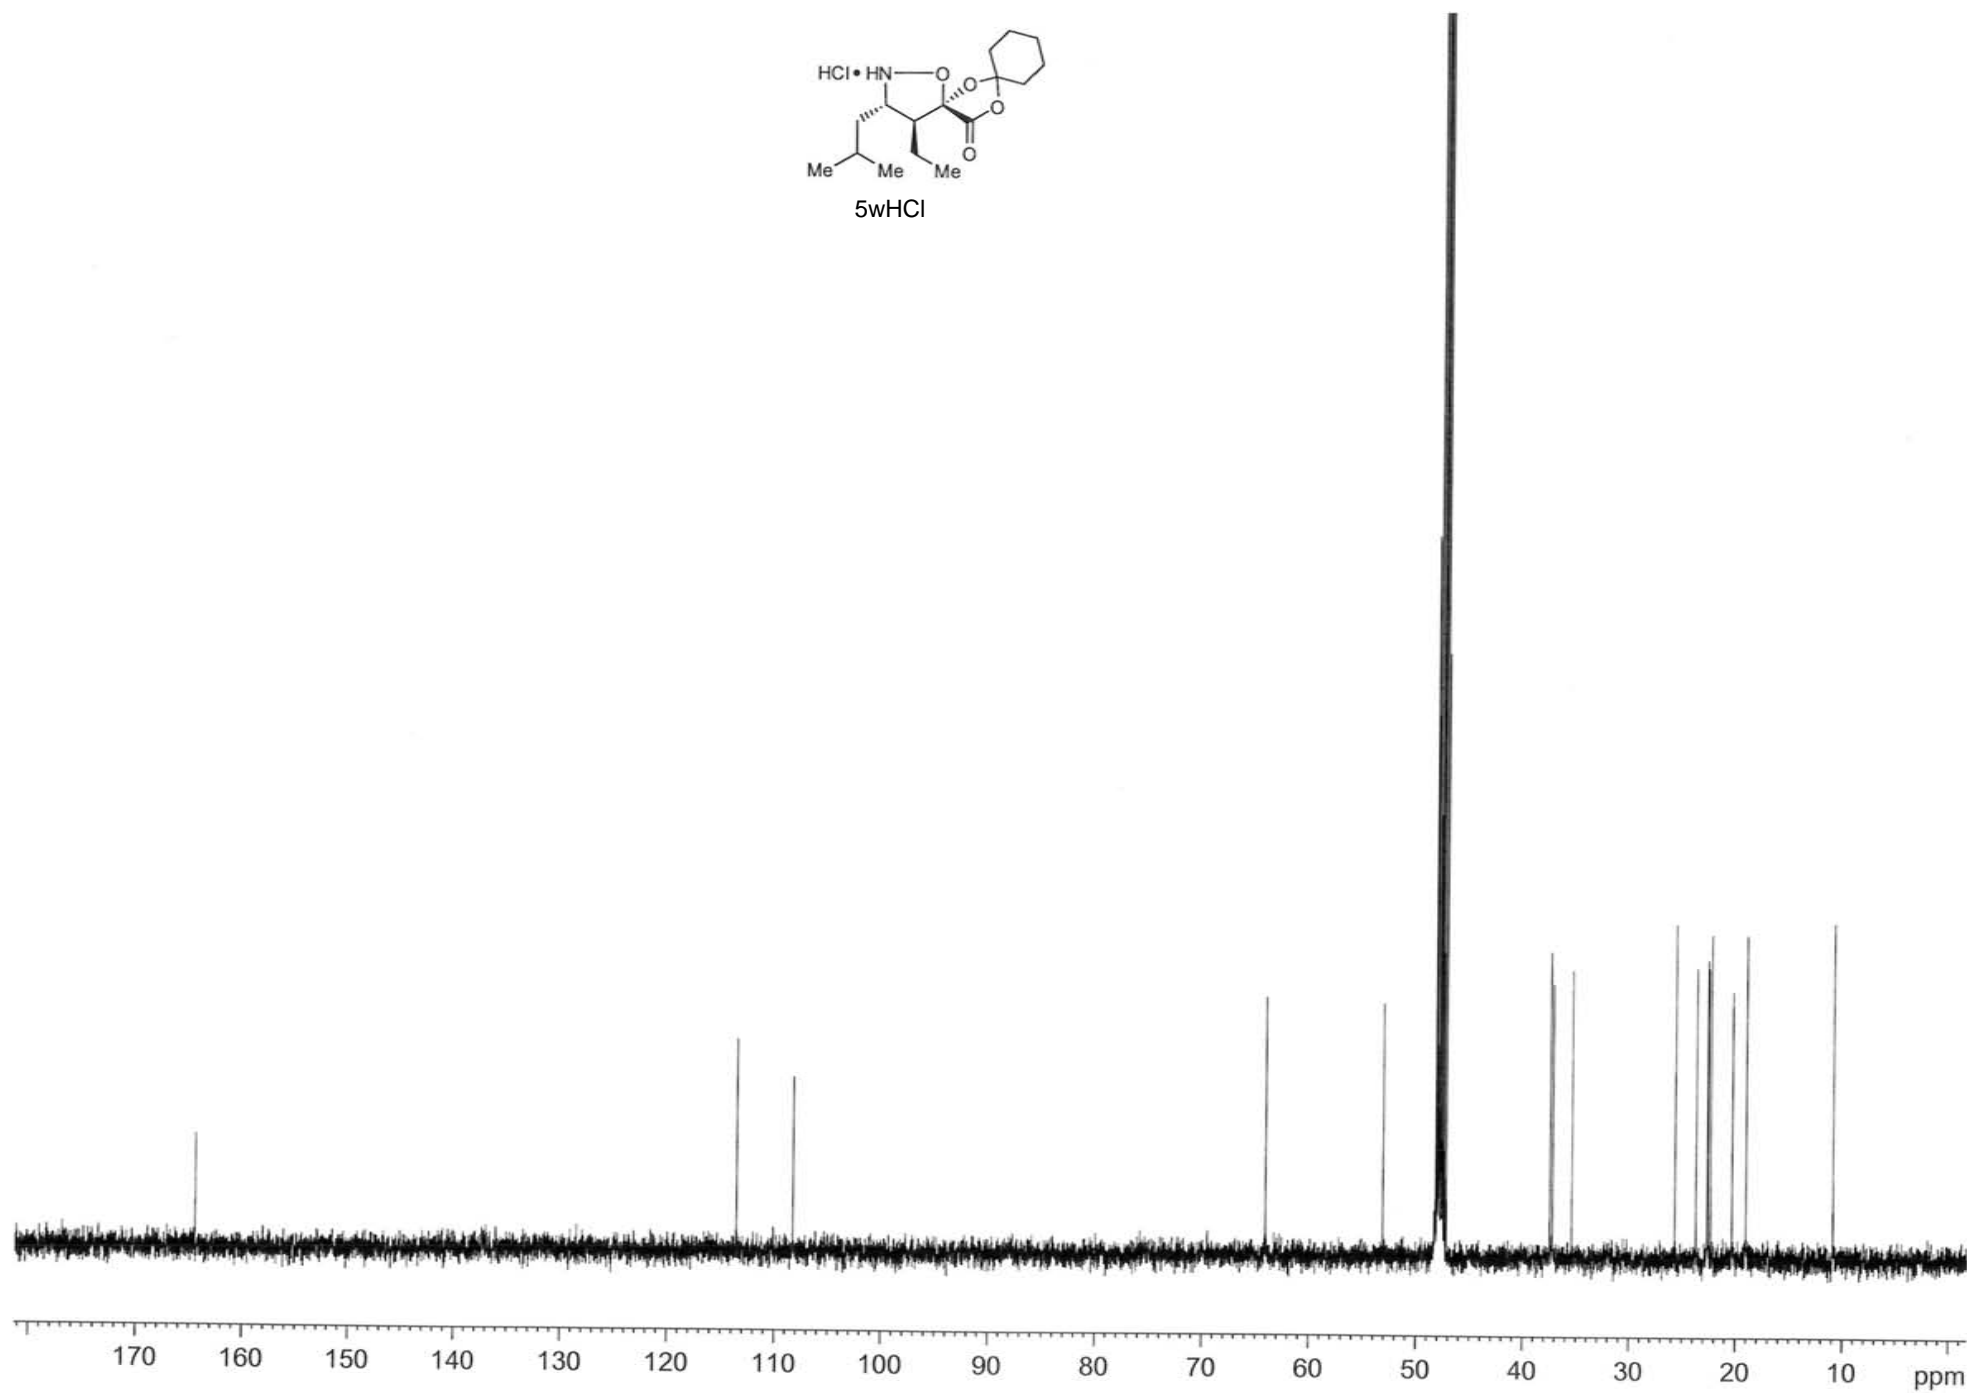

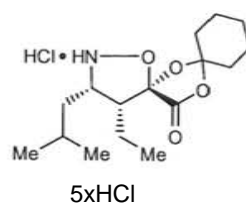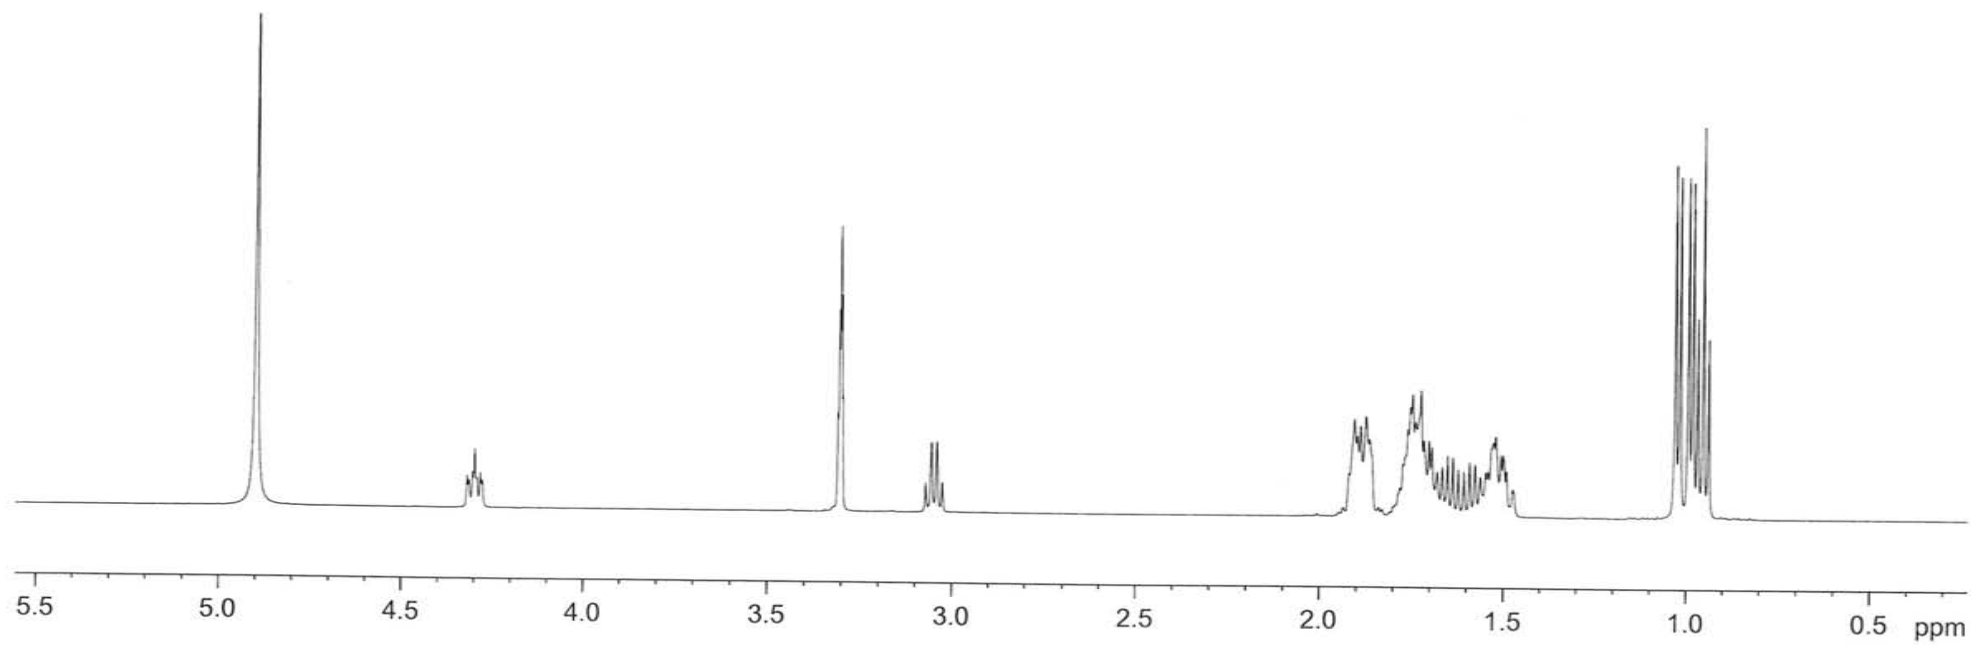

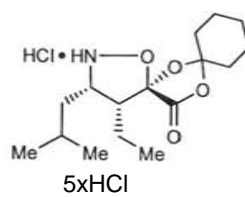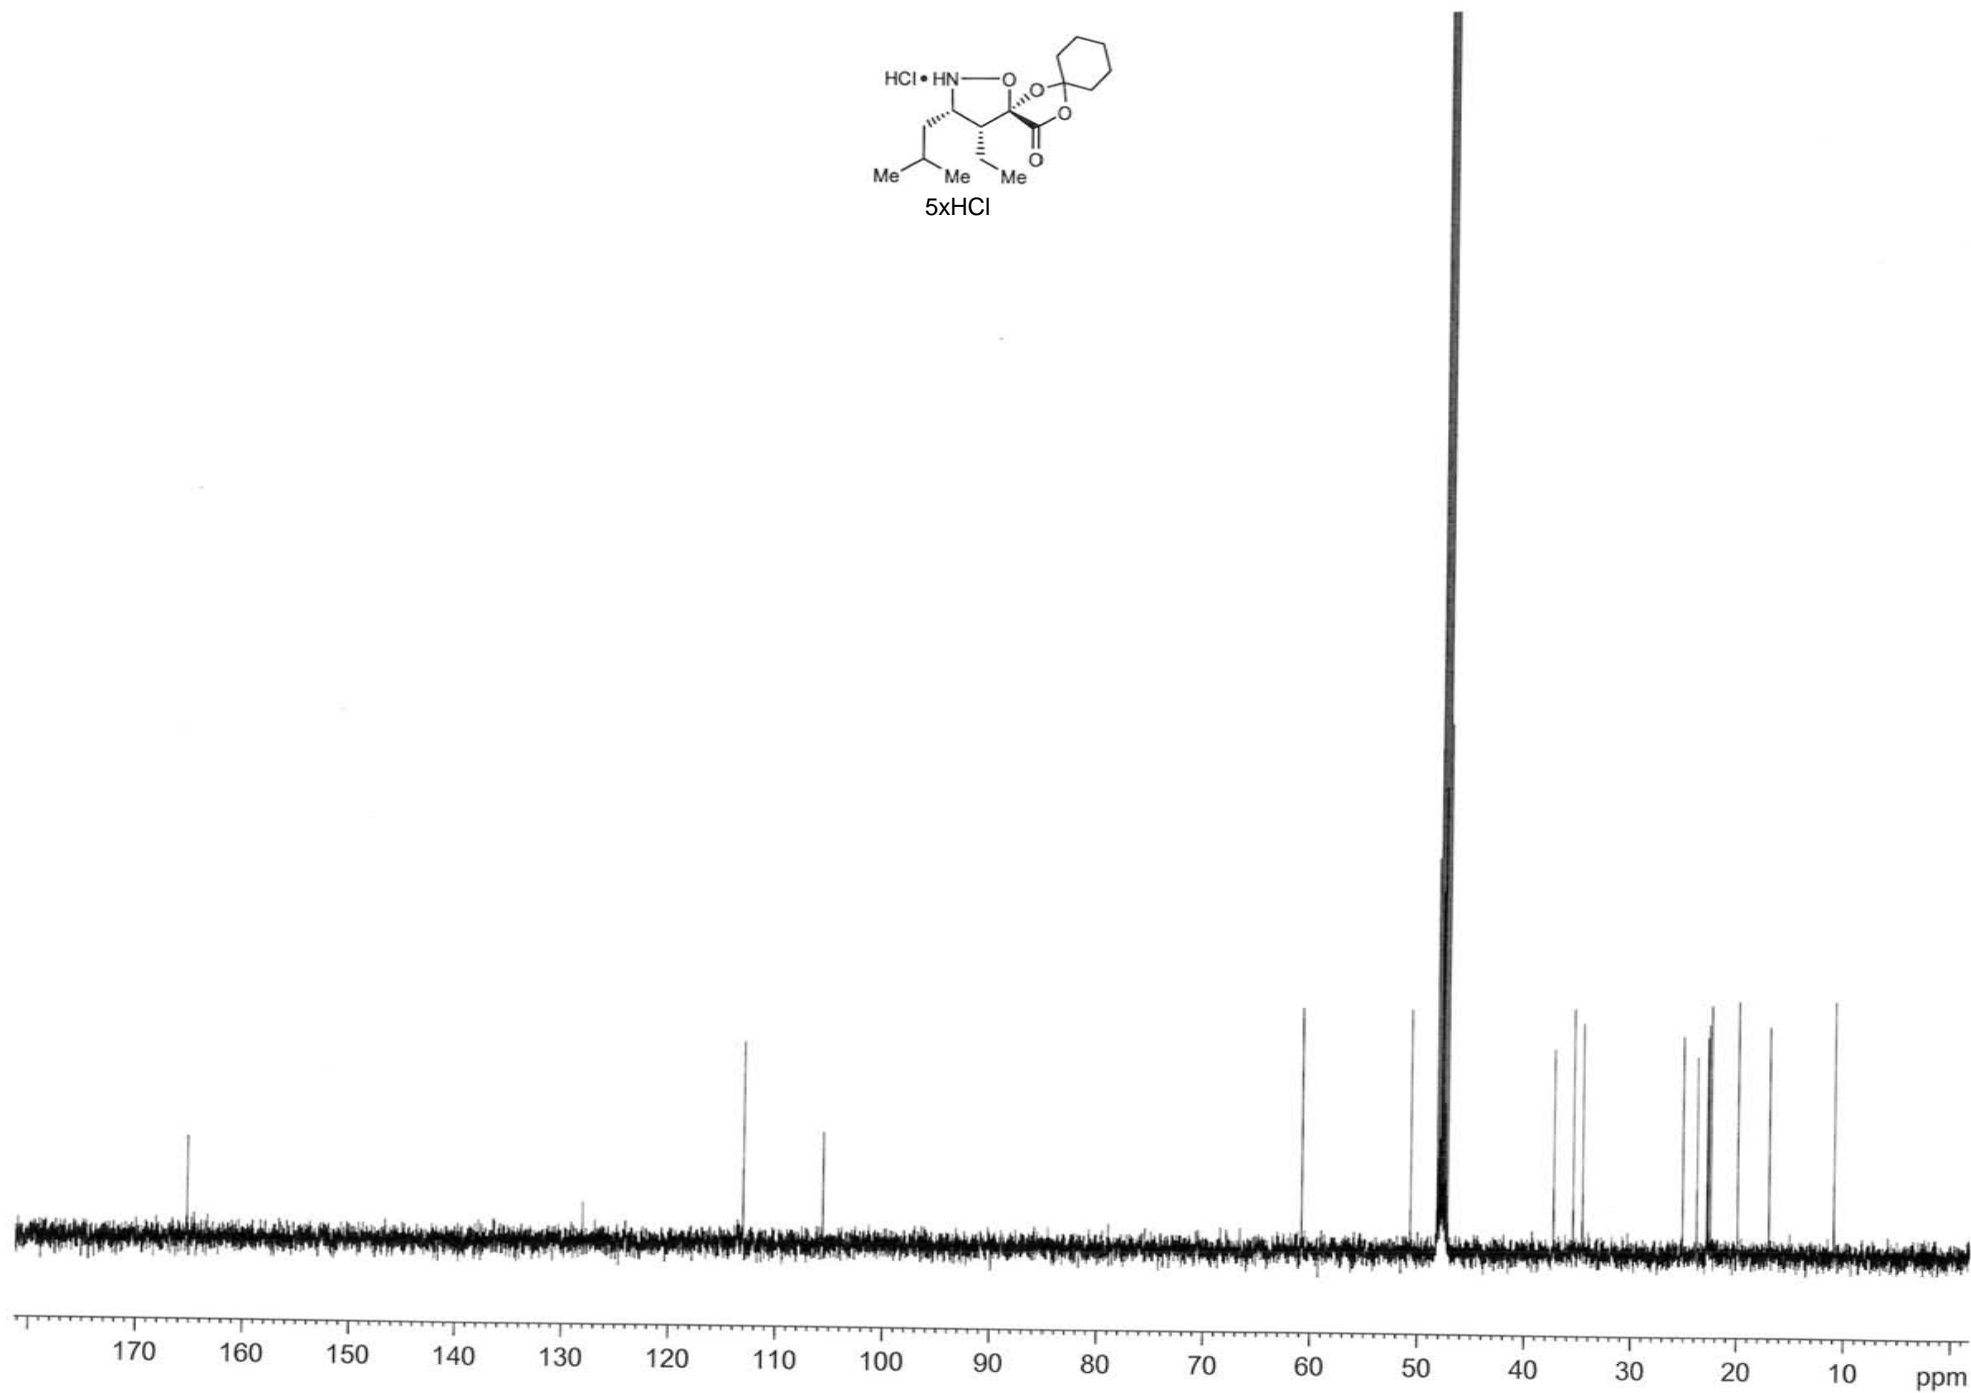



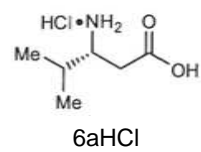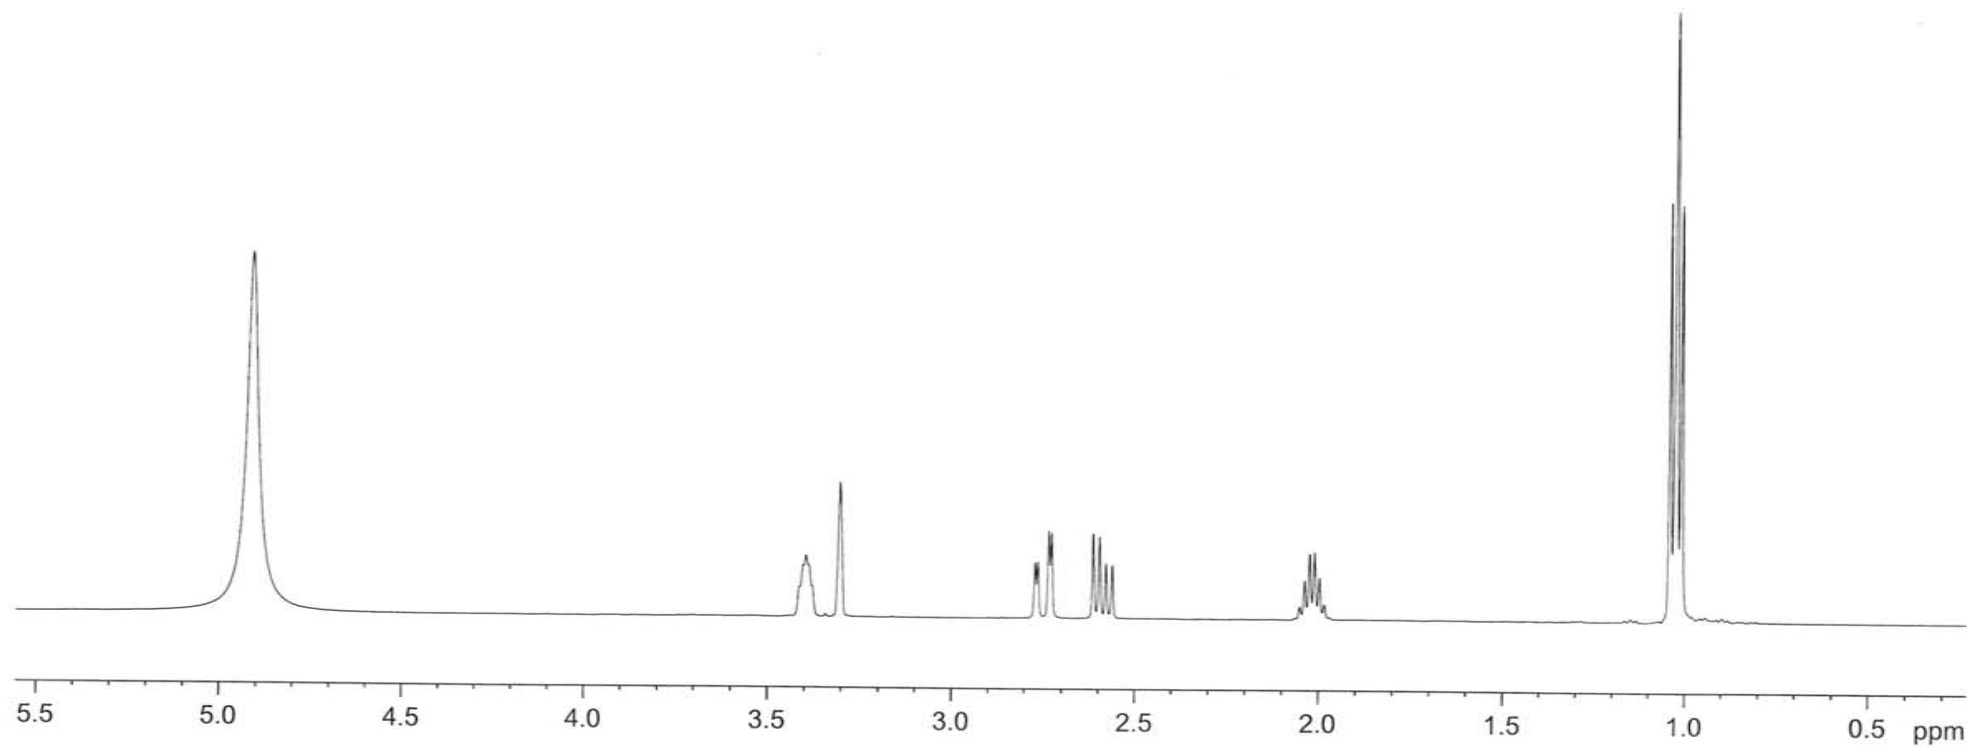

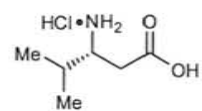

6aHCl

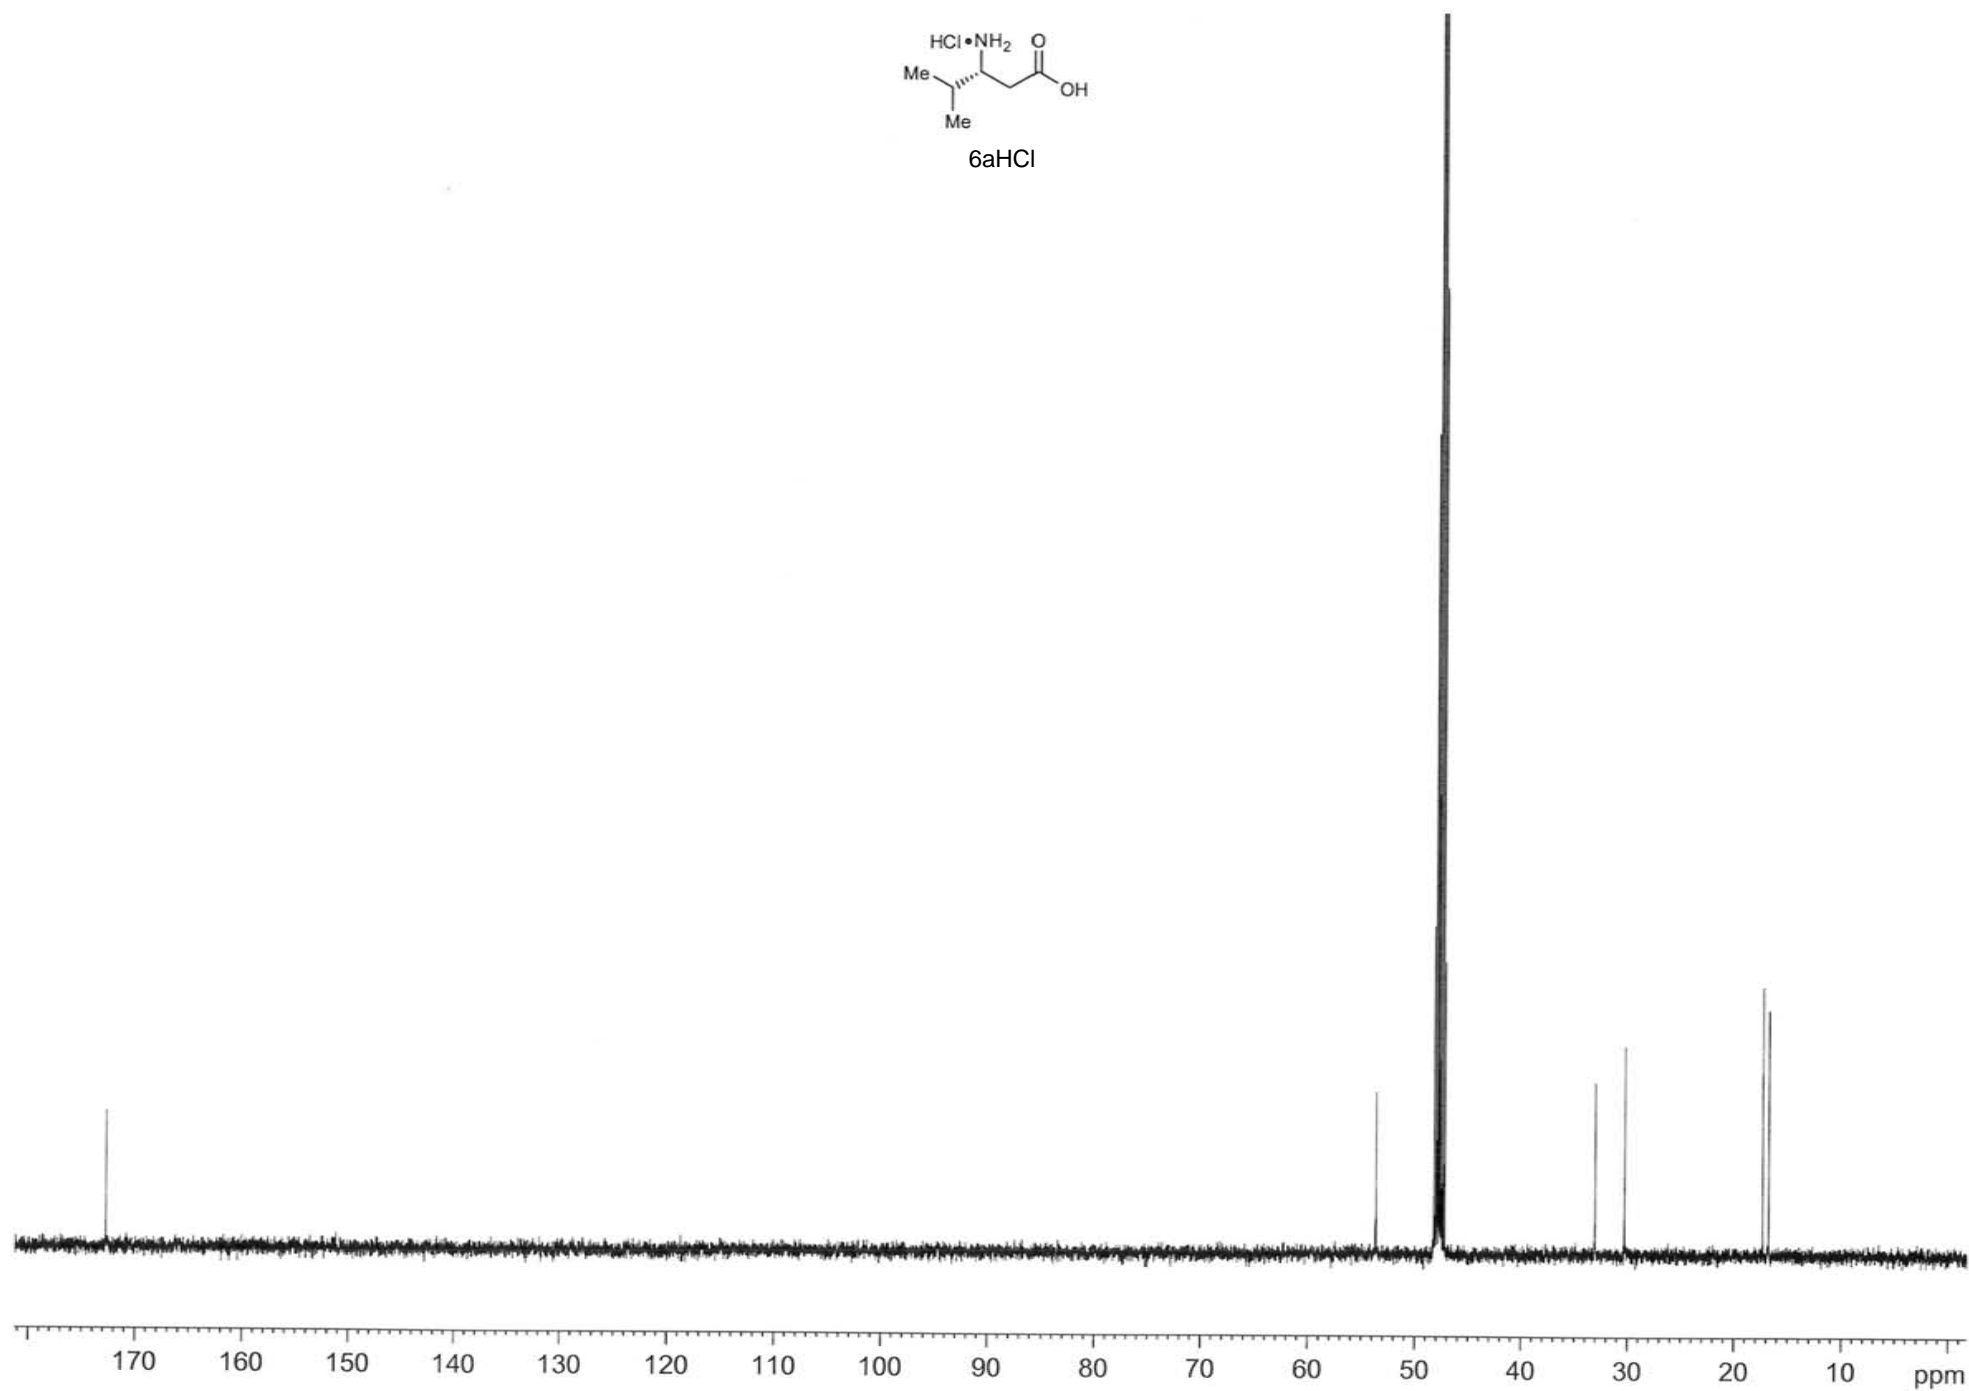

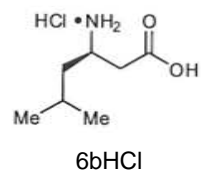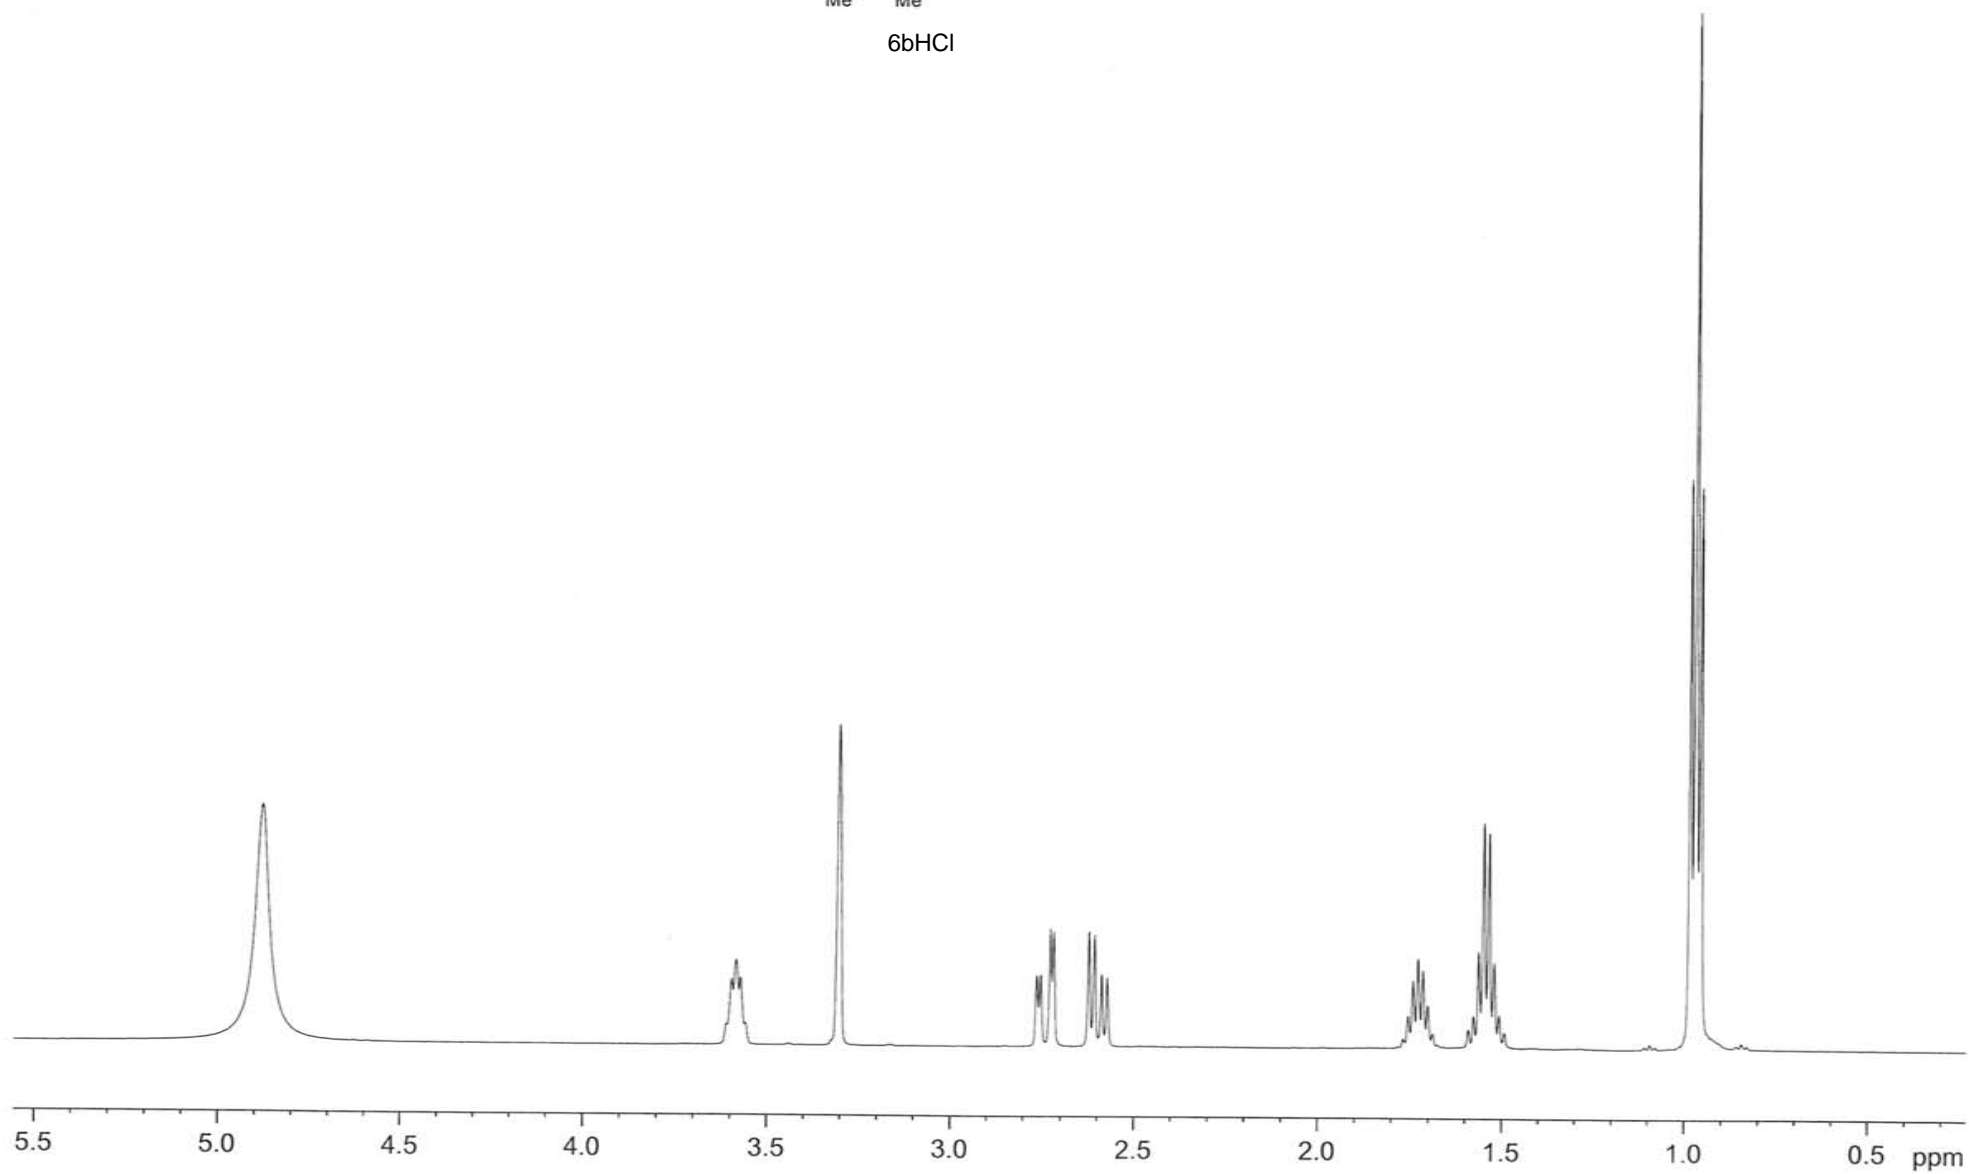

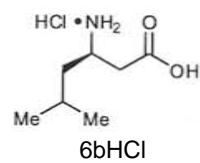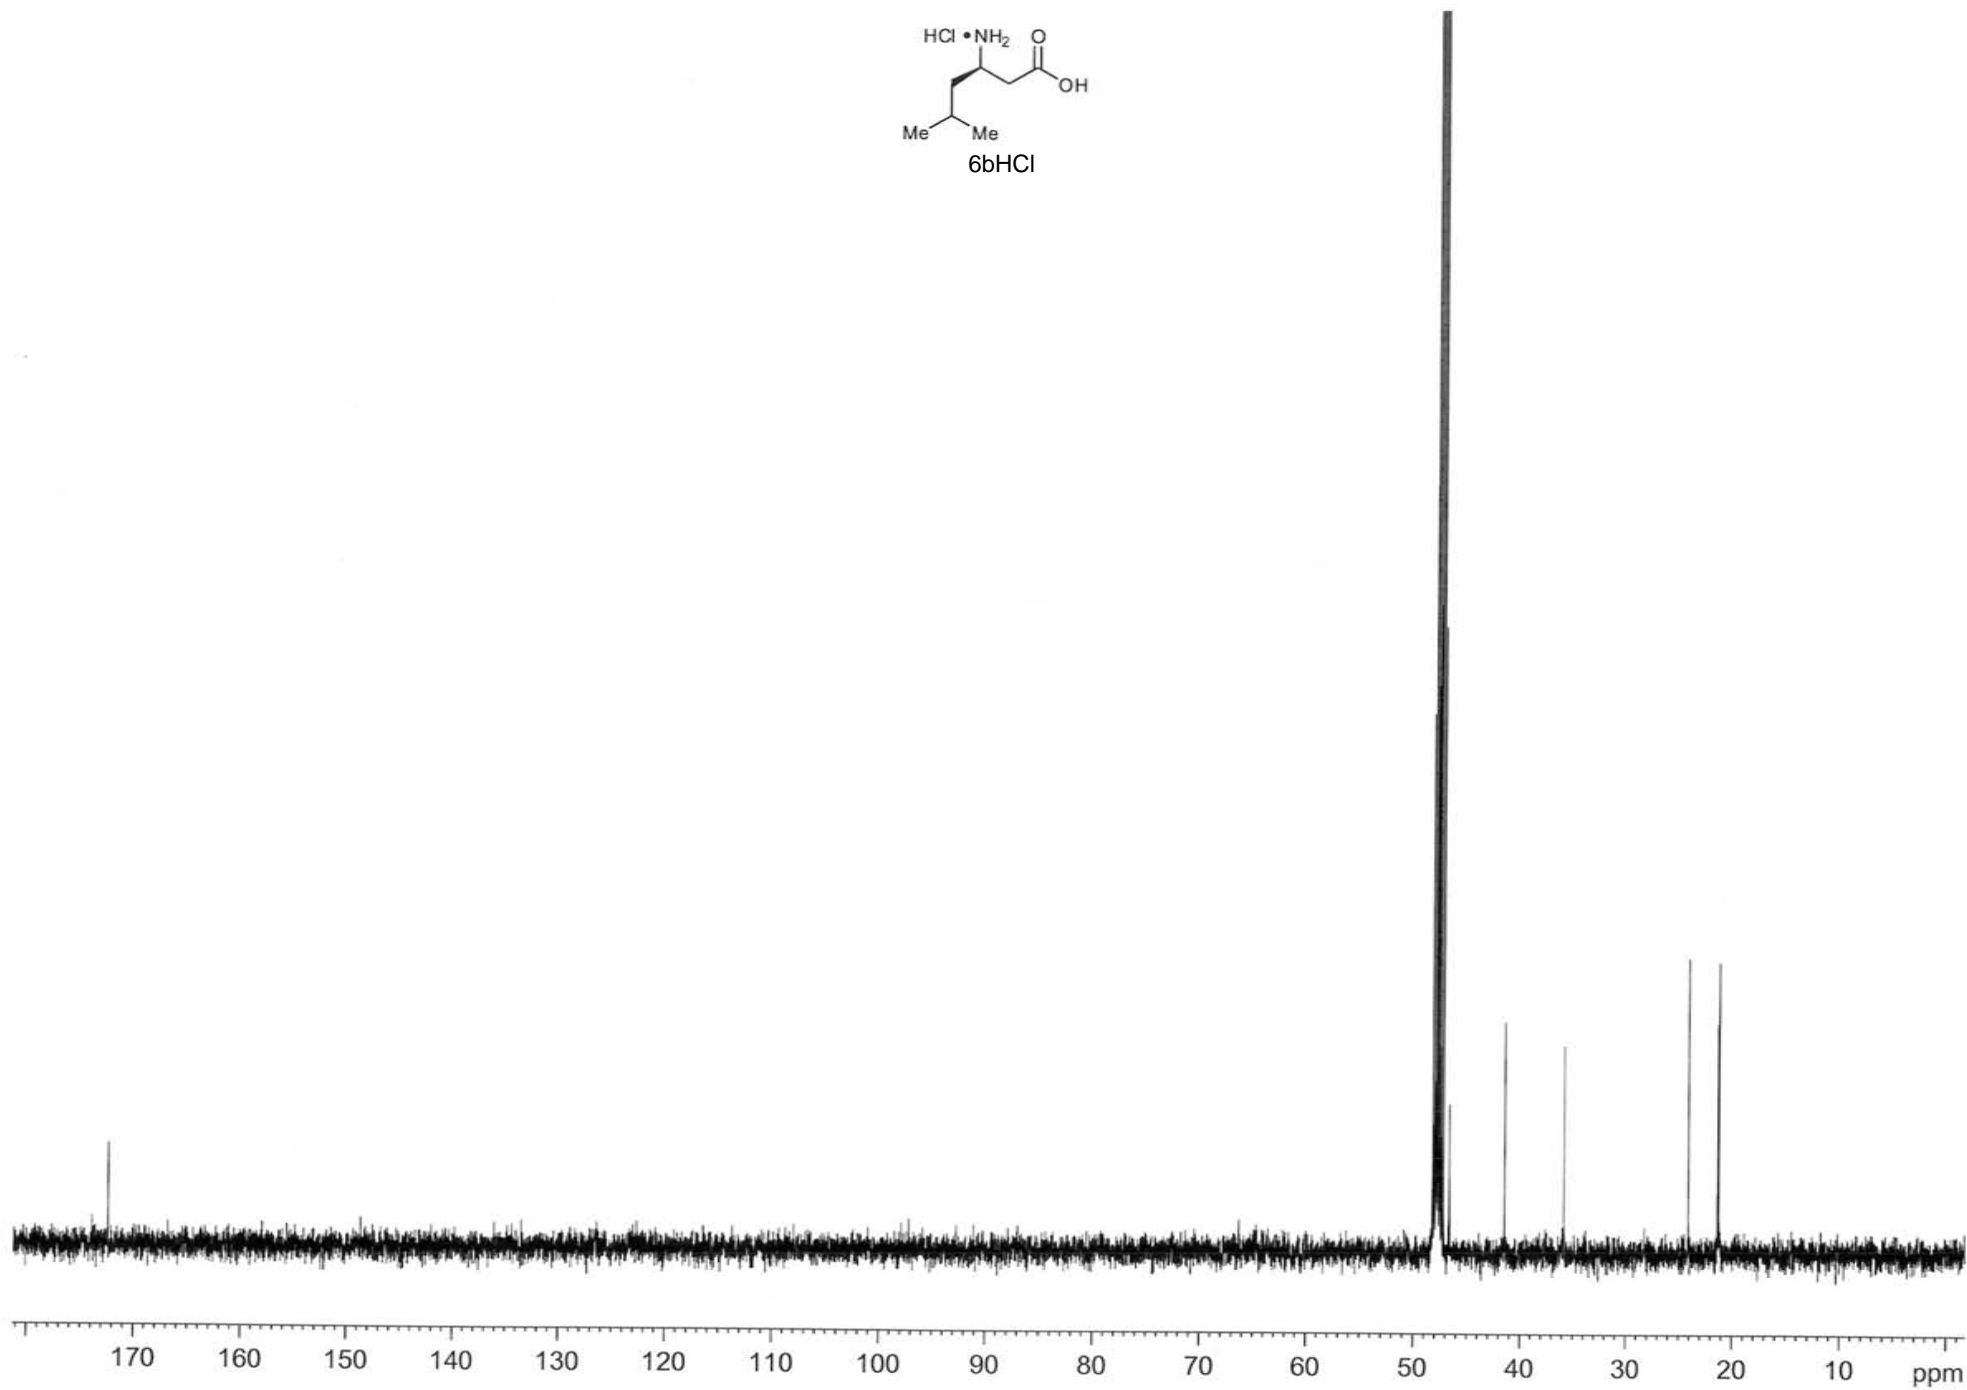

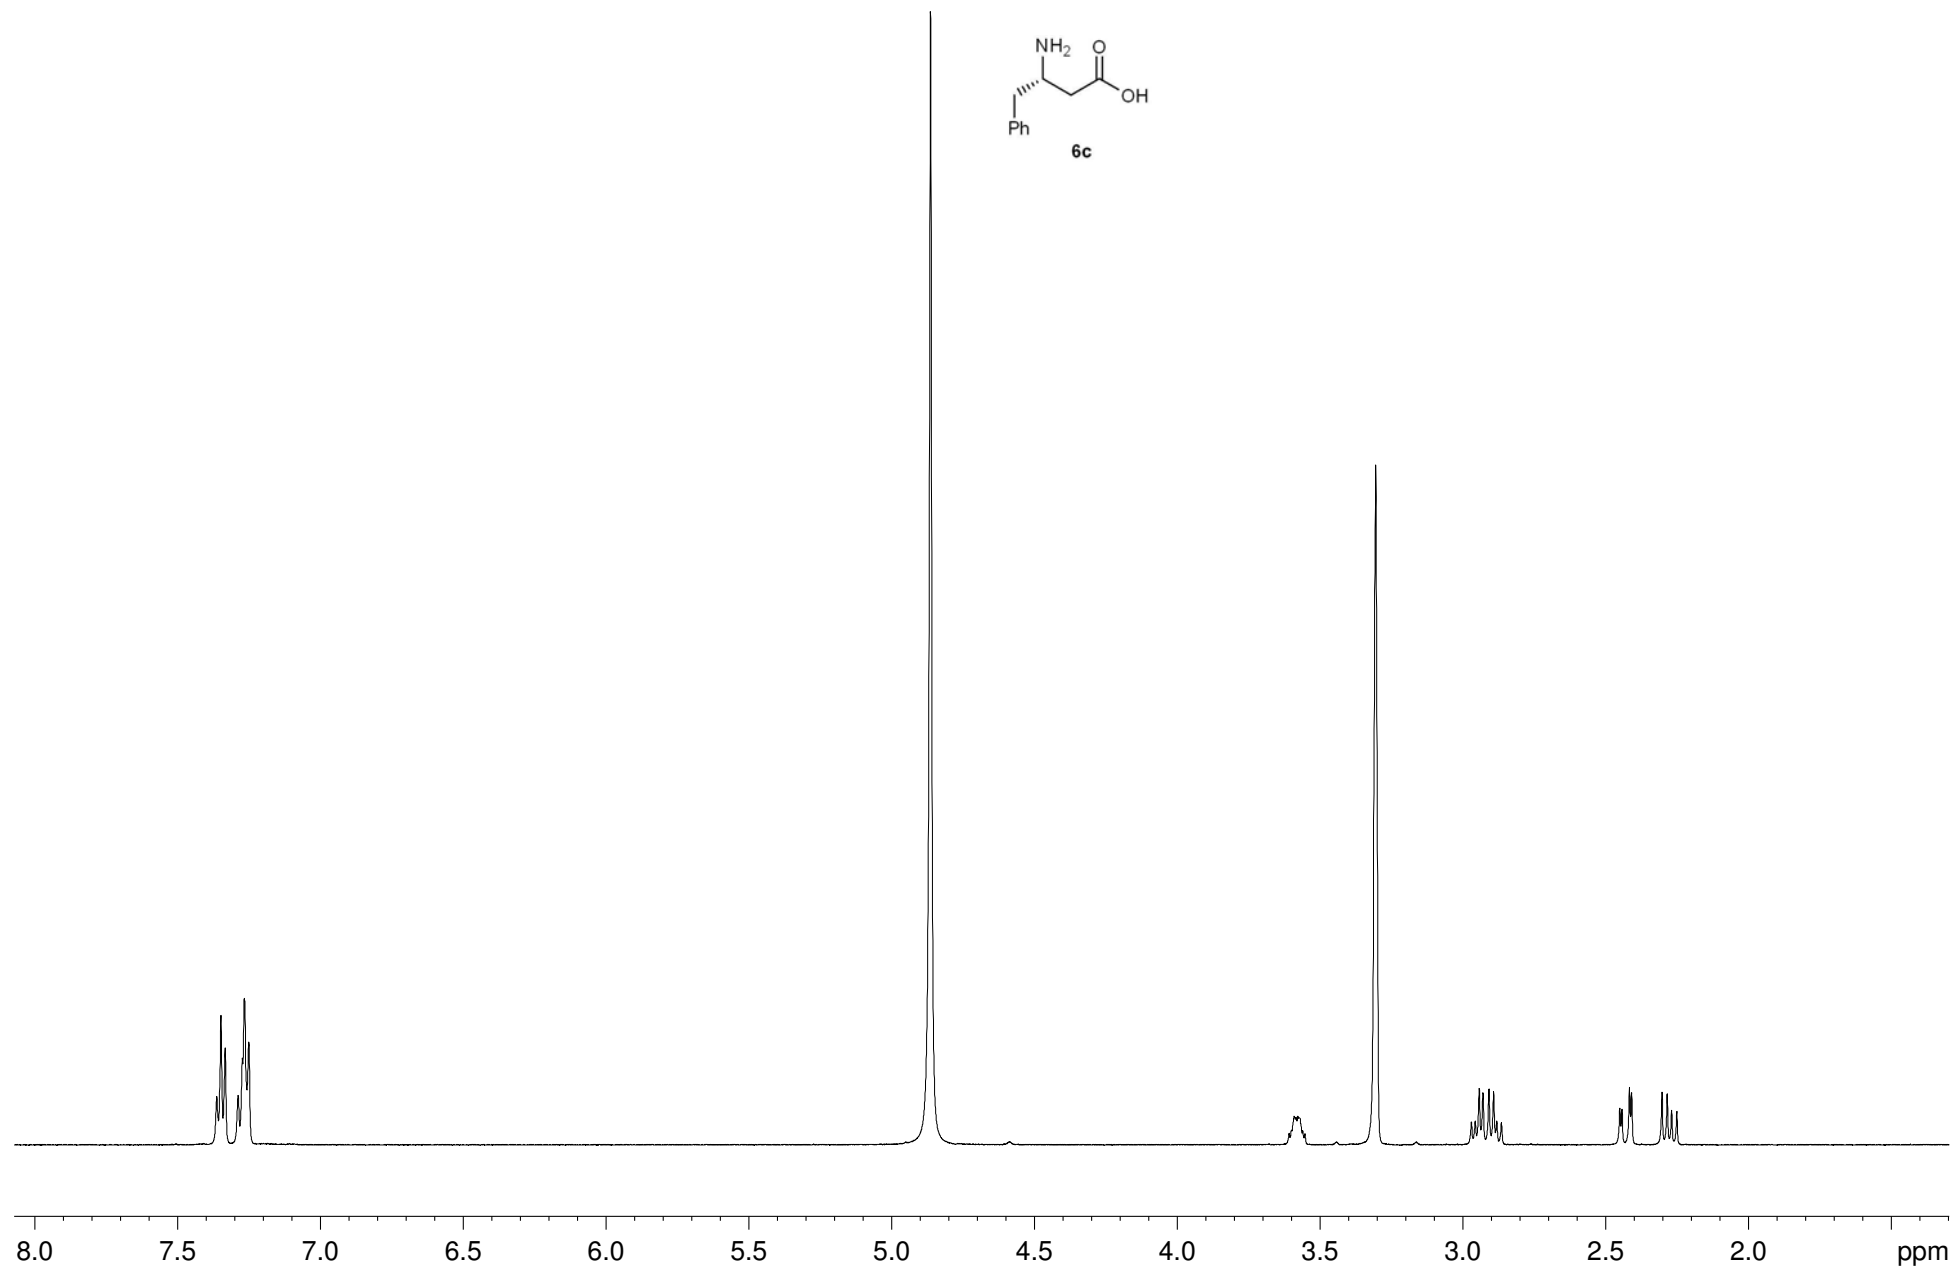

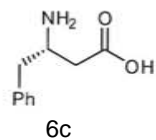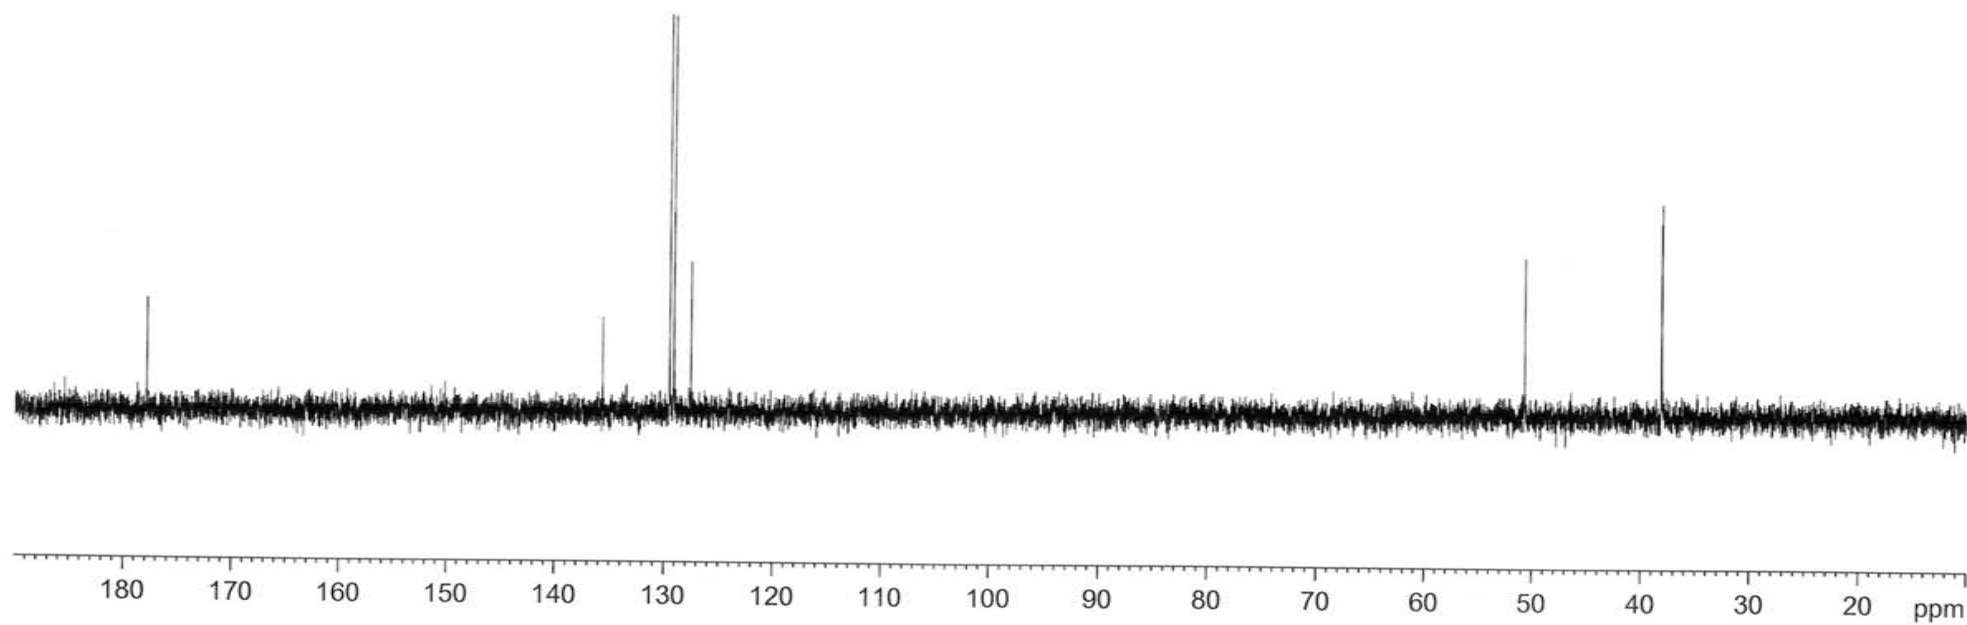

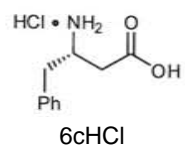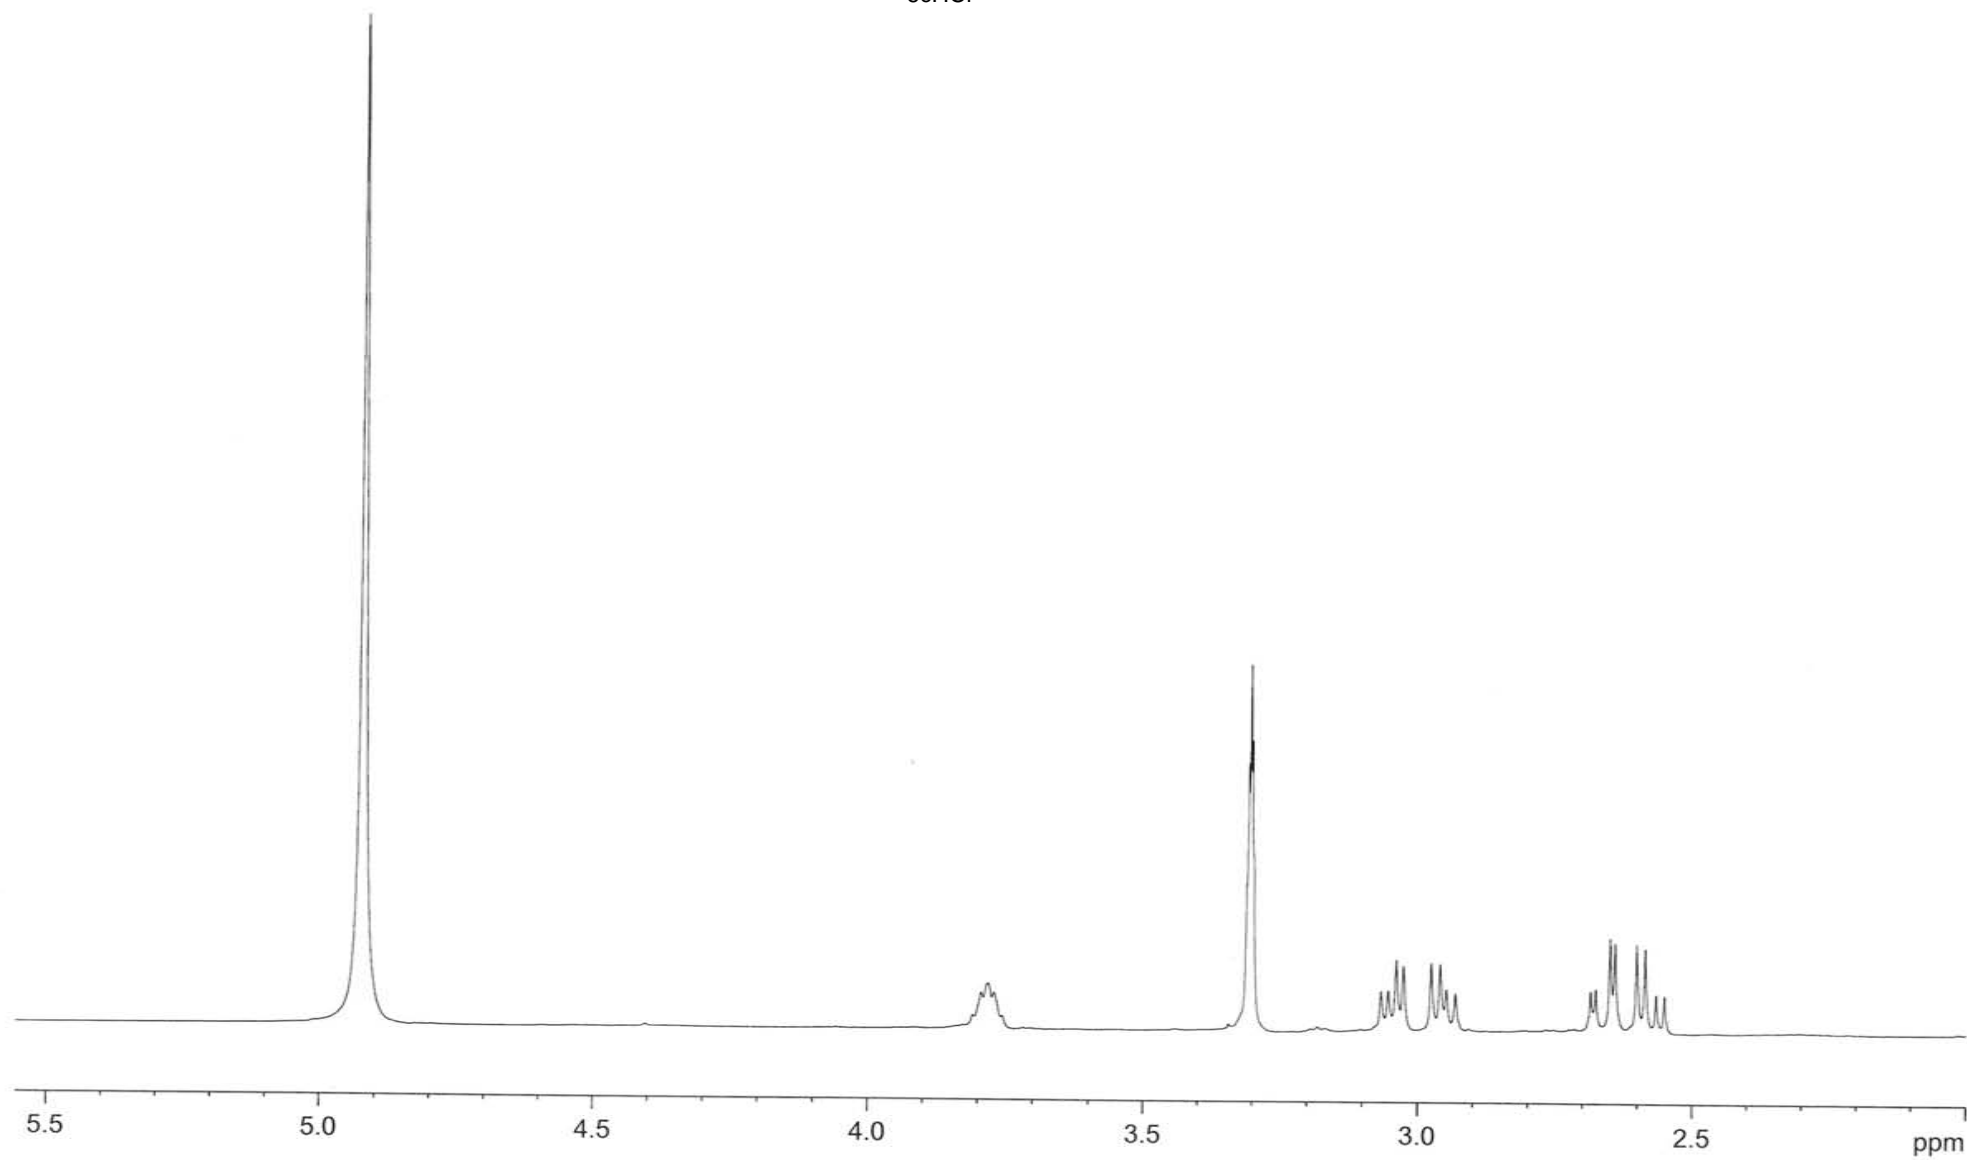

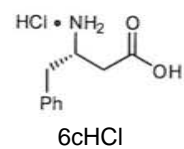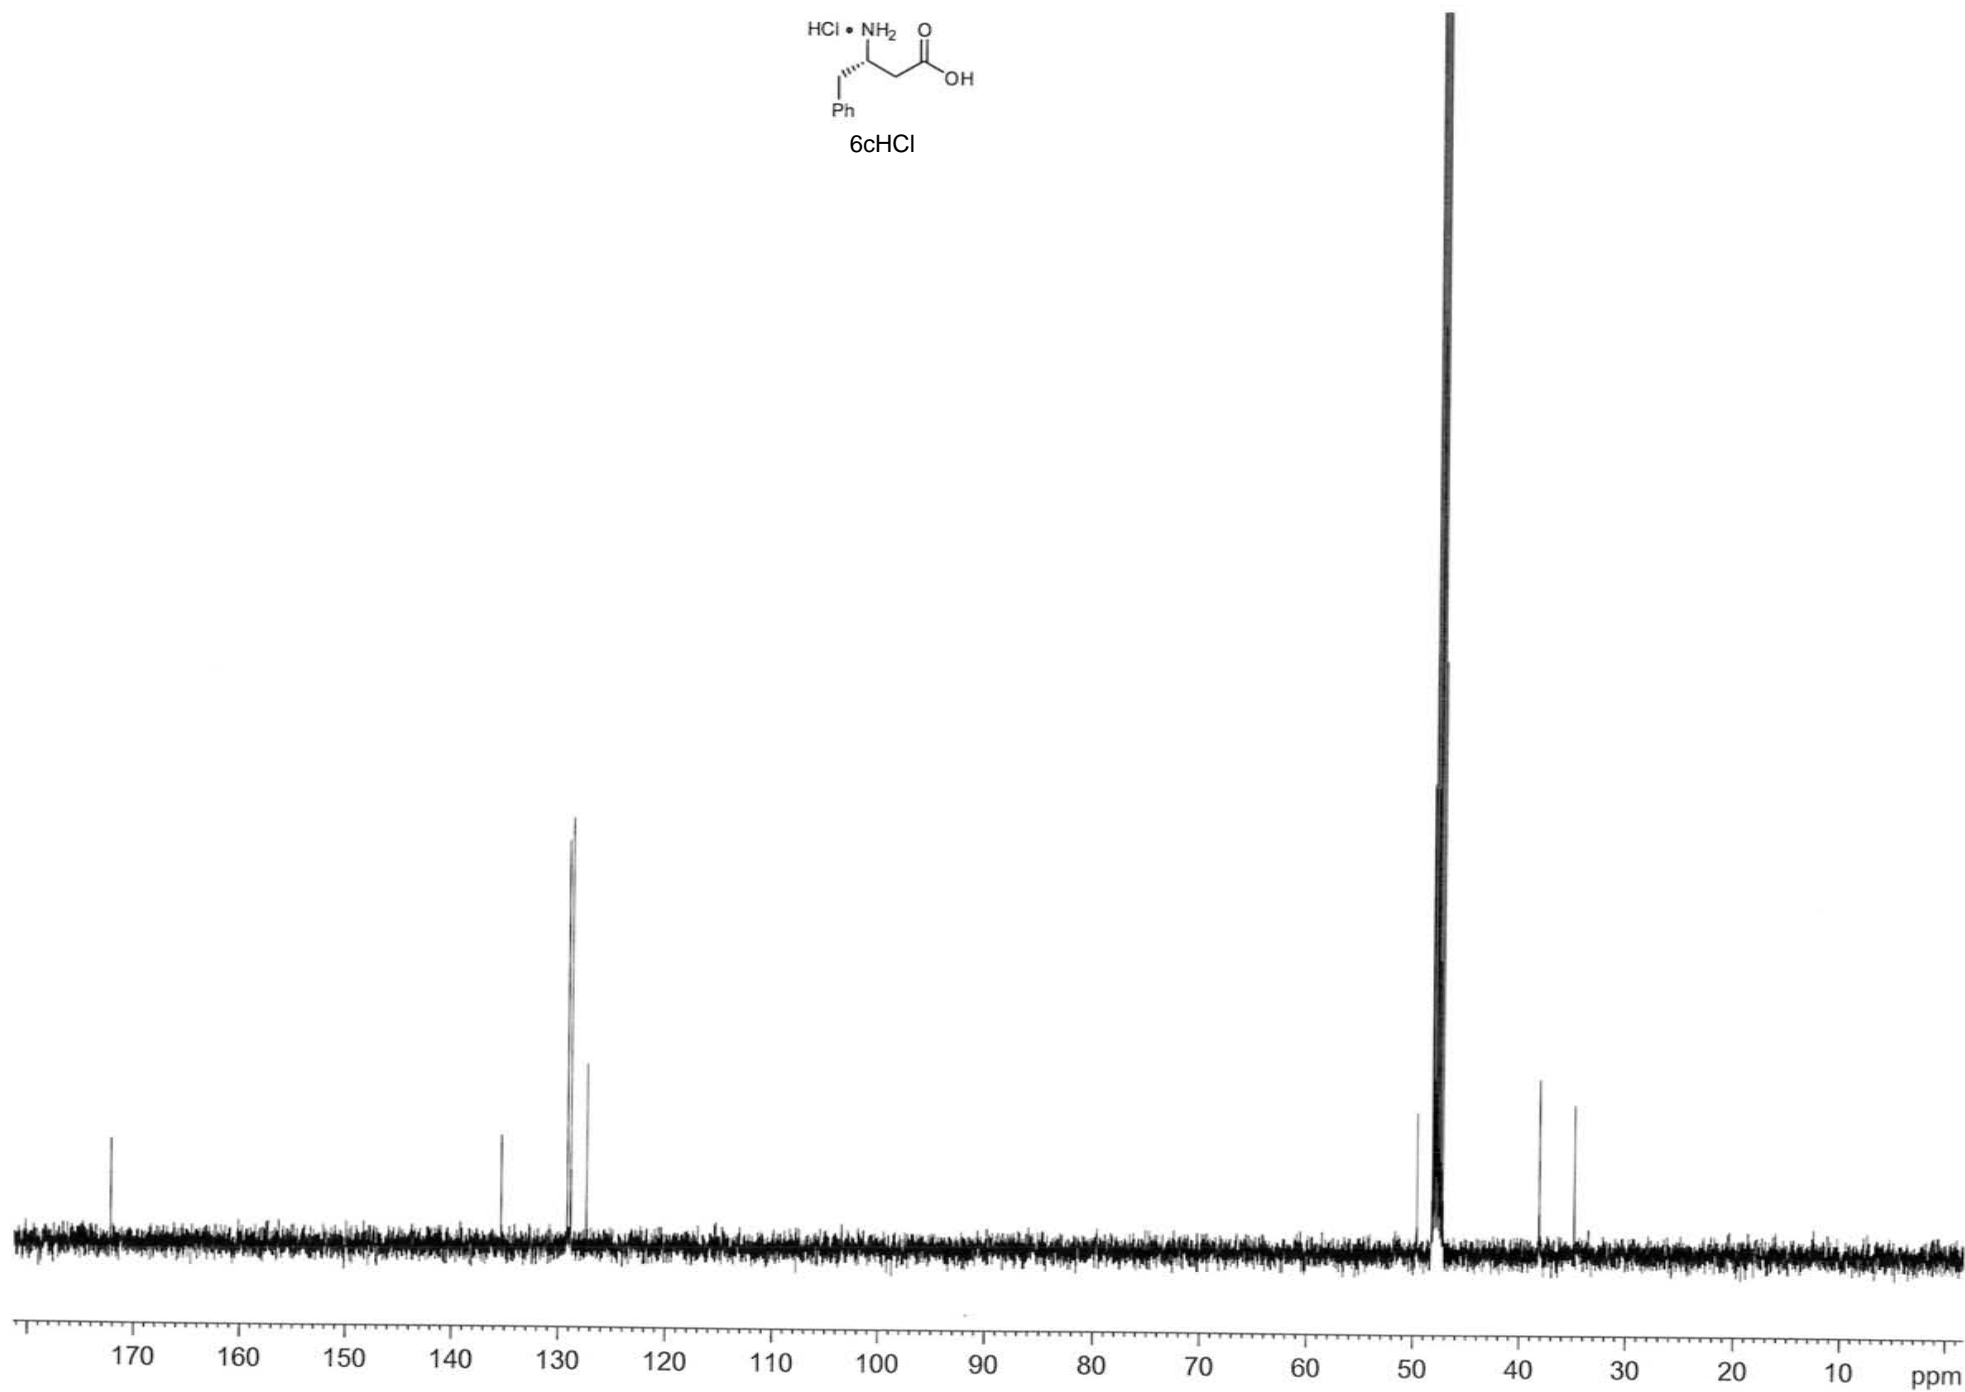



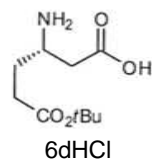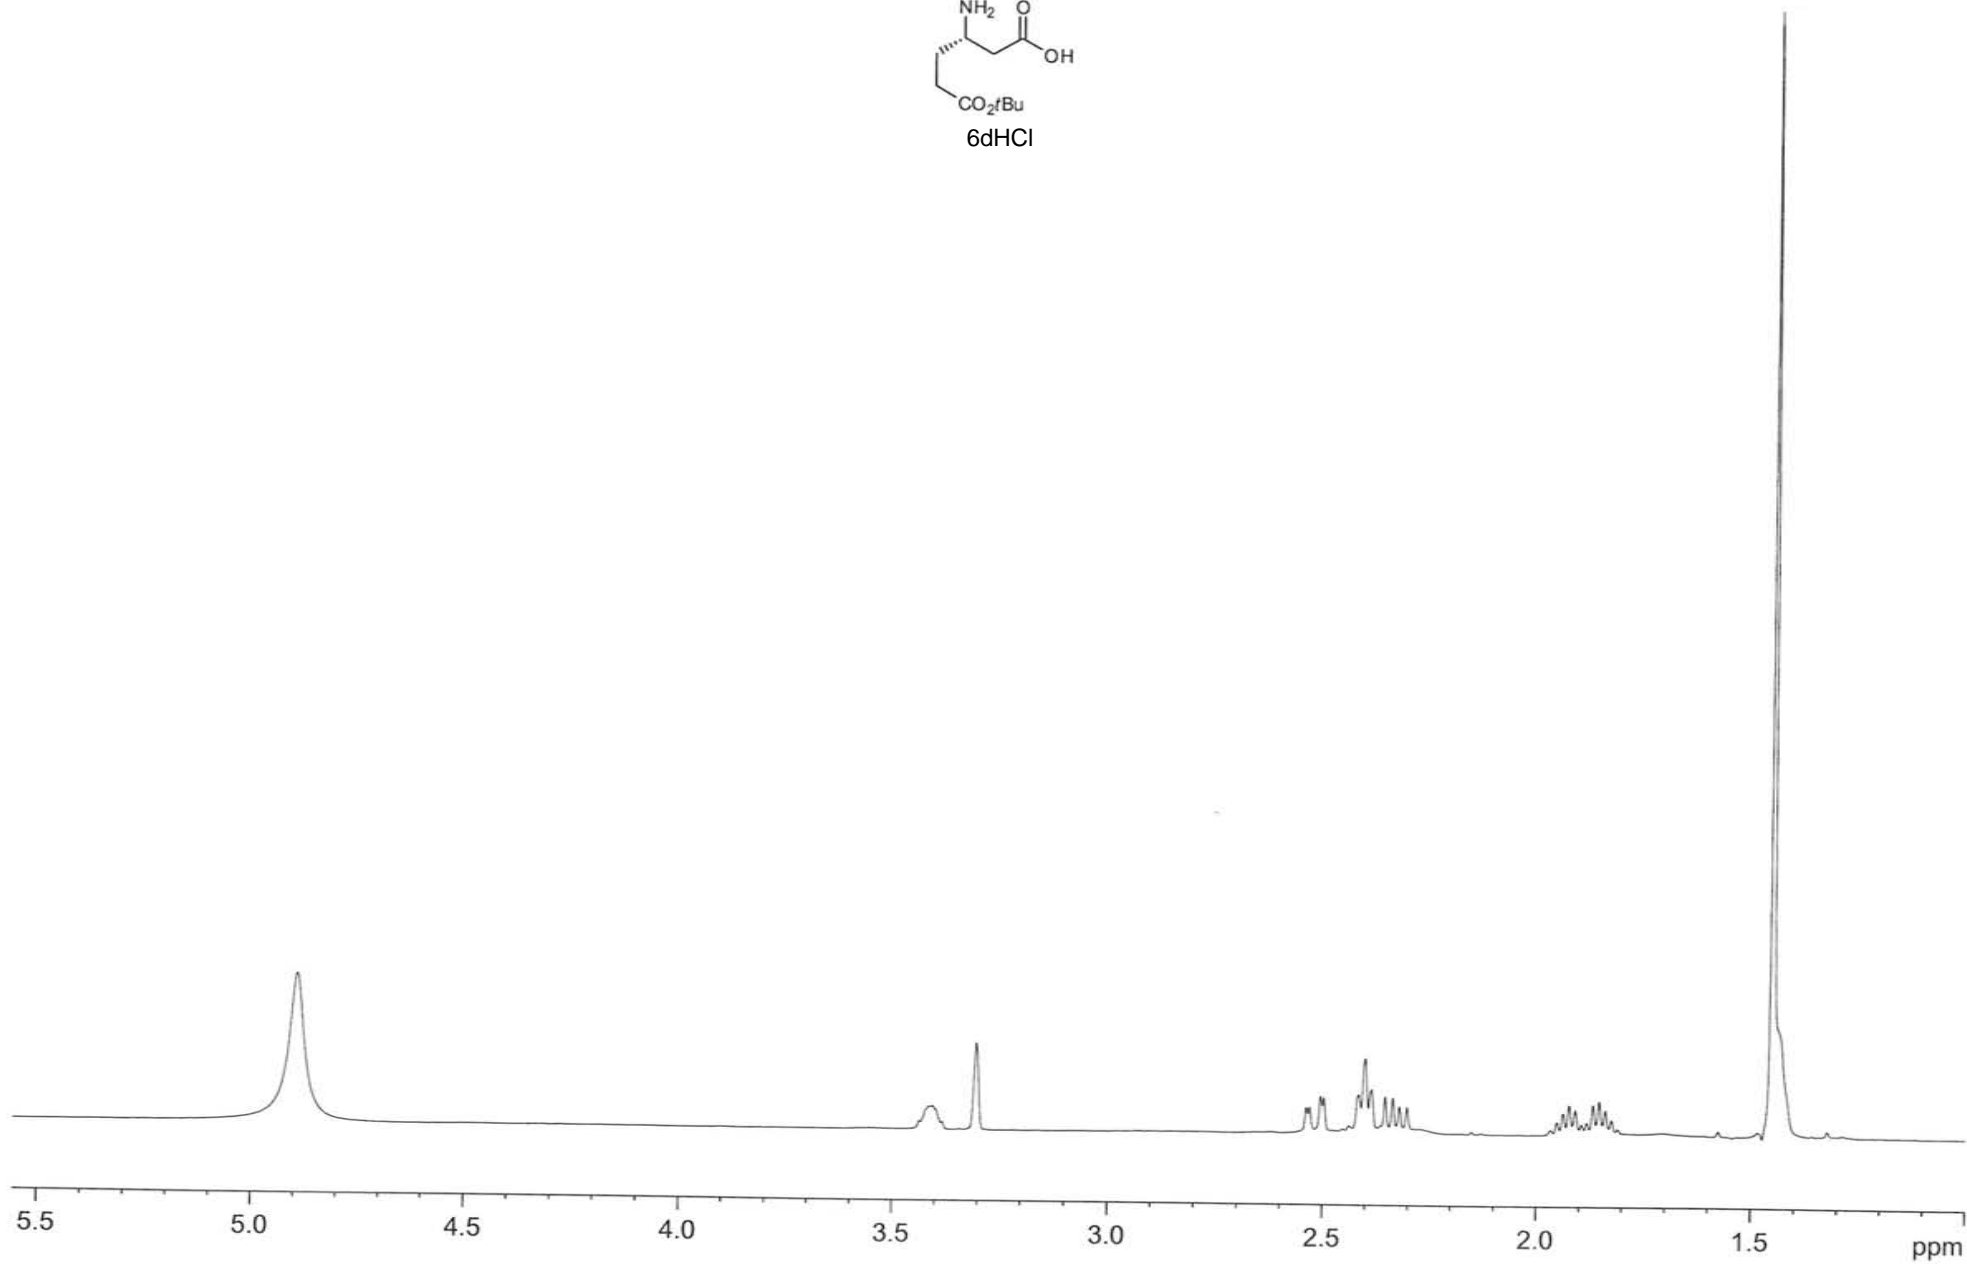

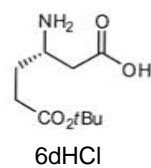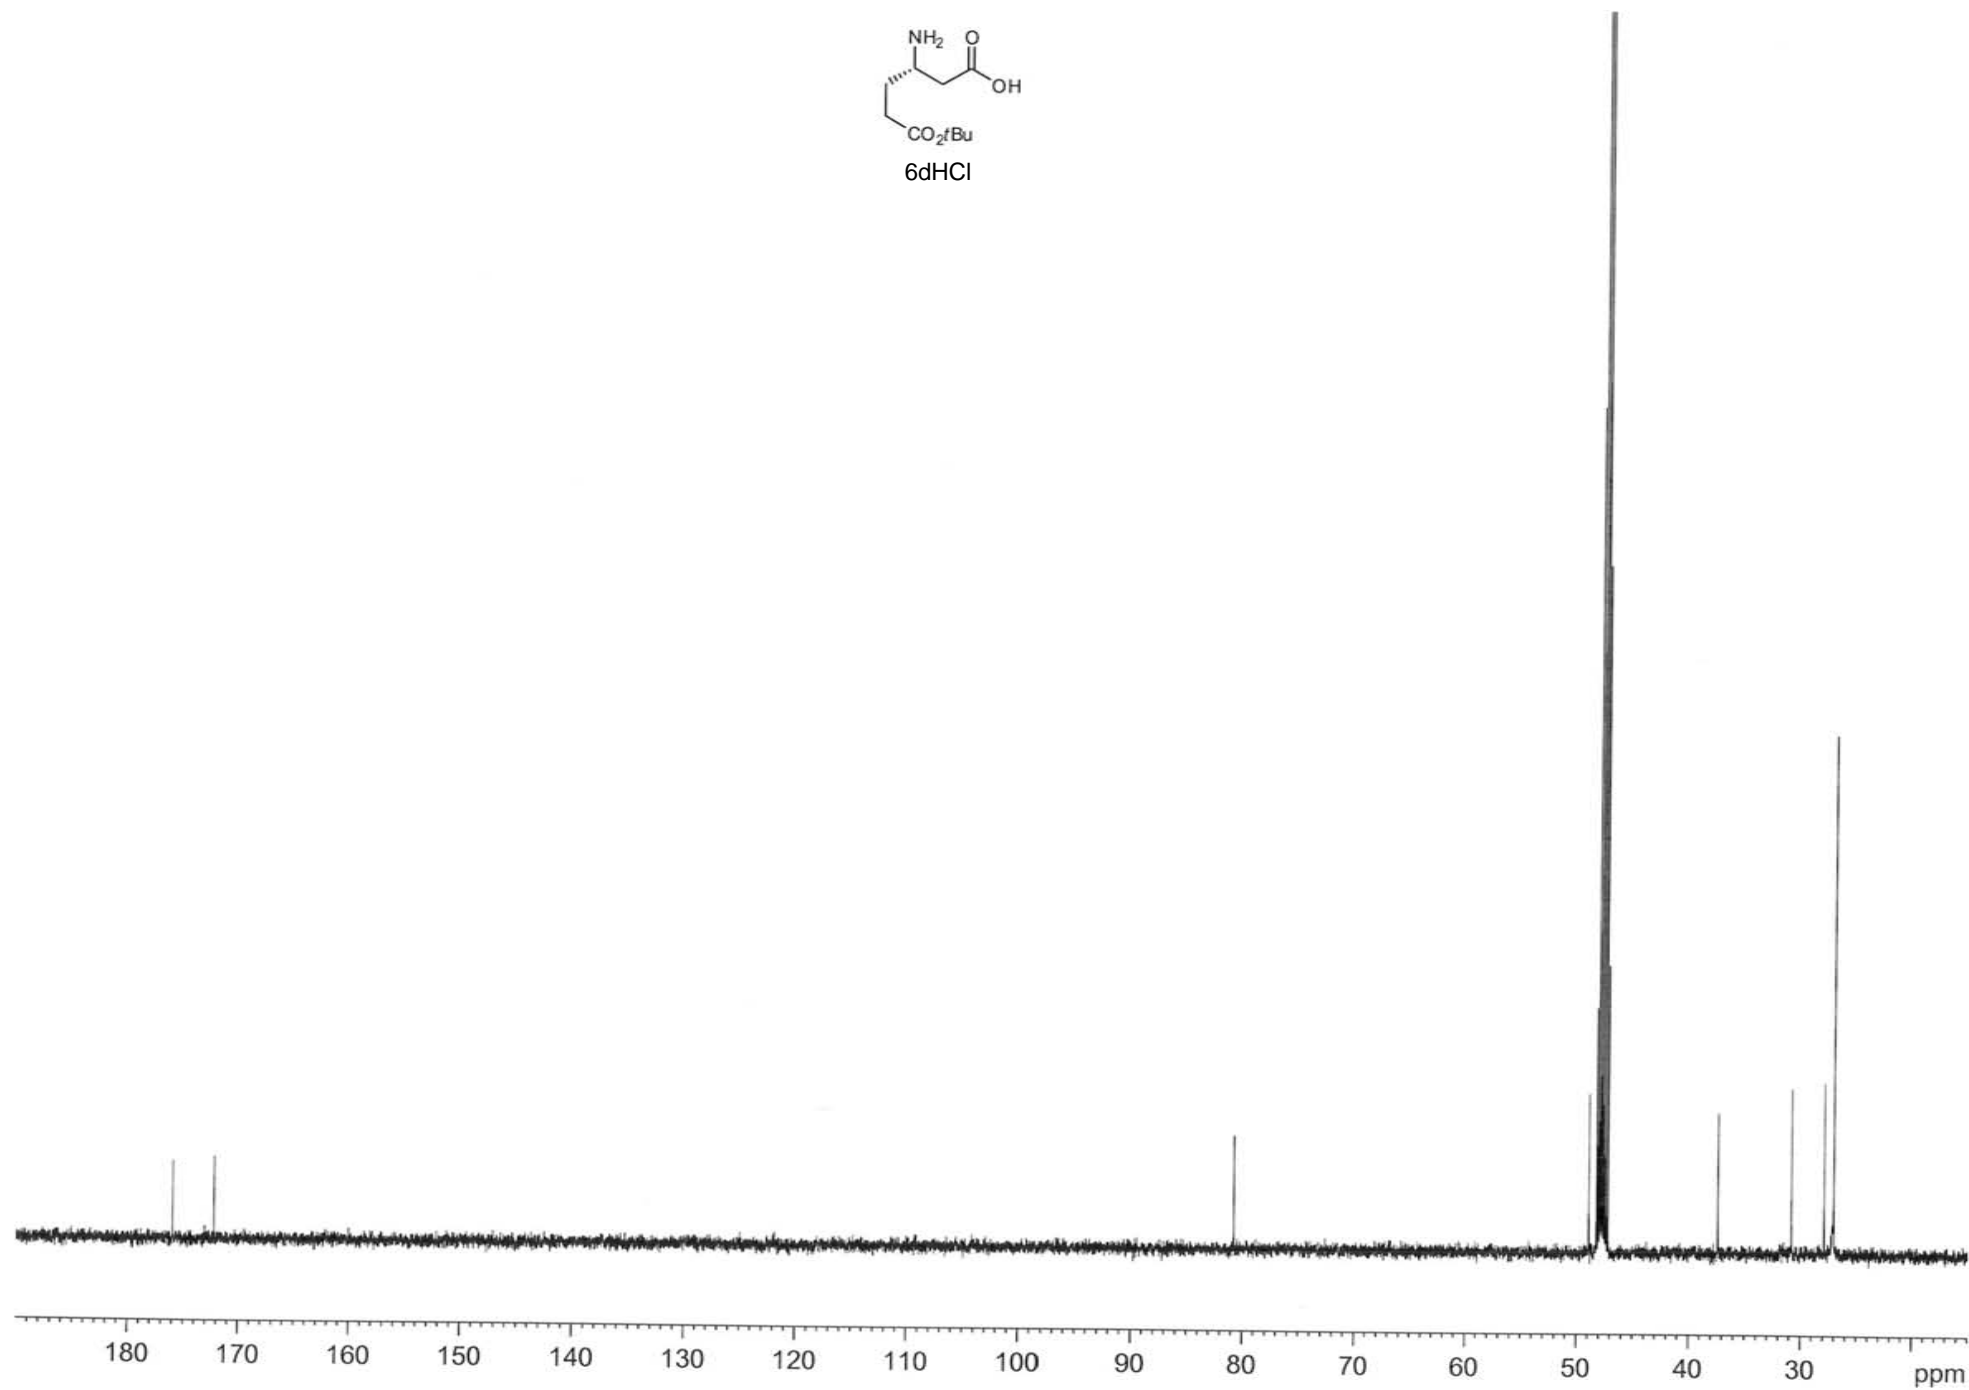

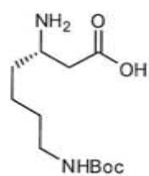

6e

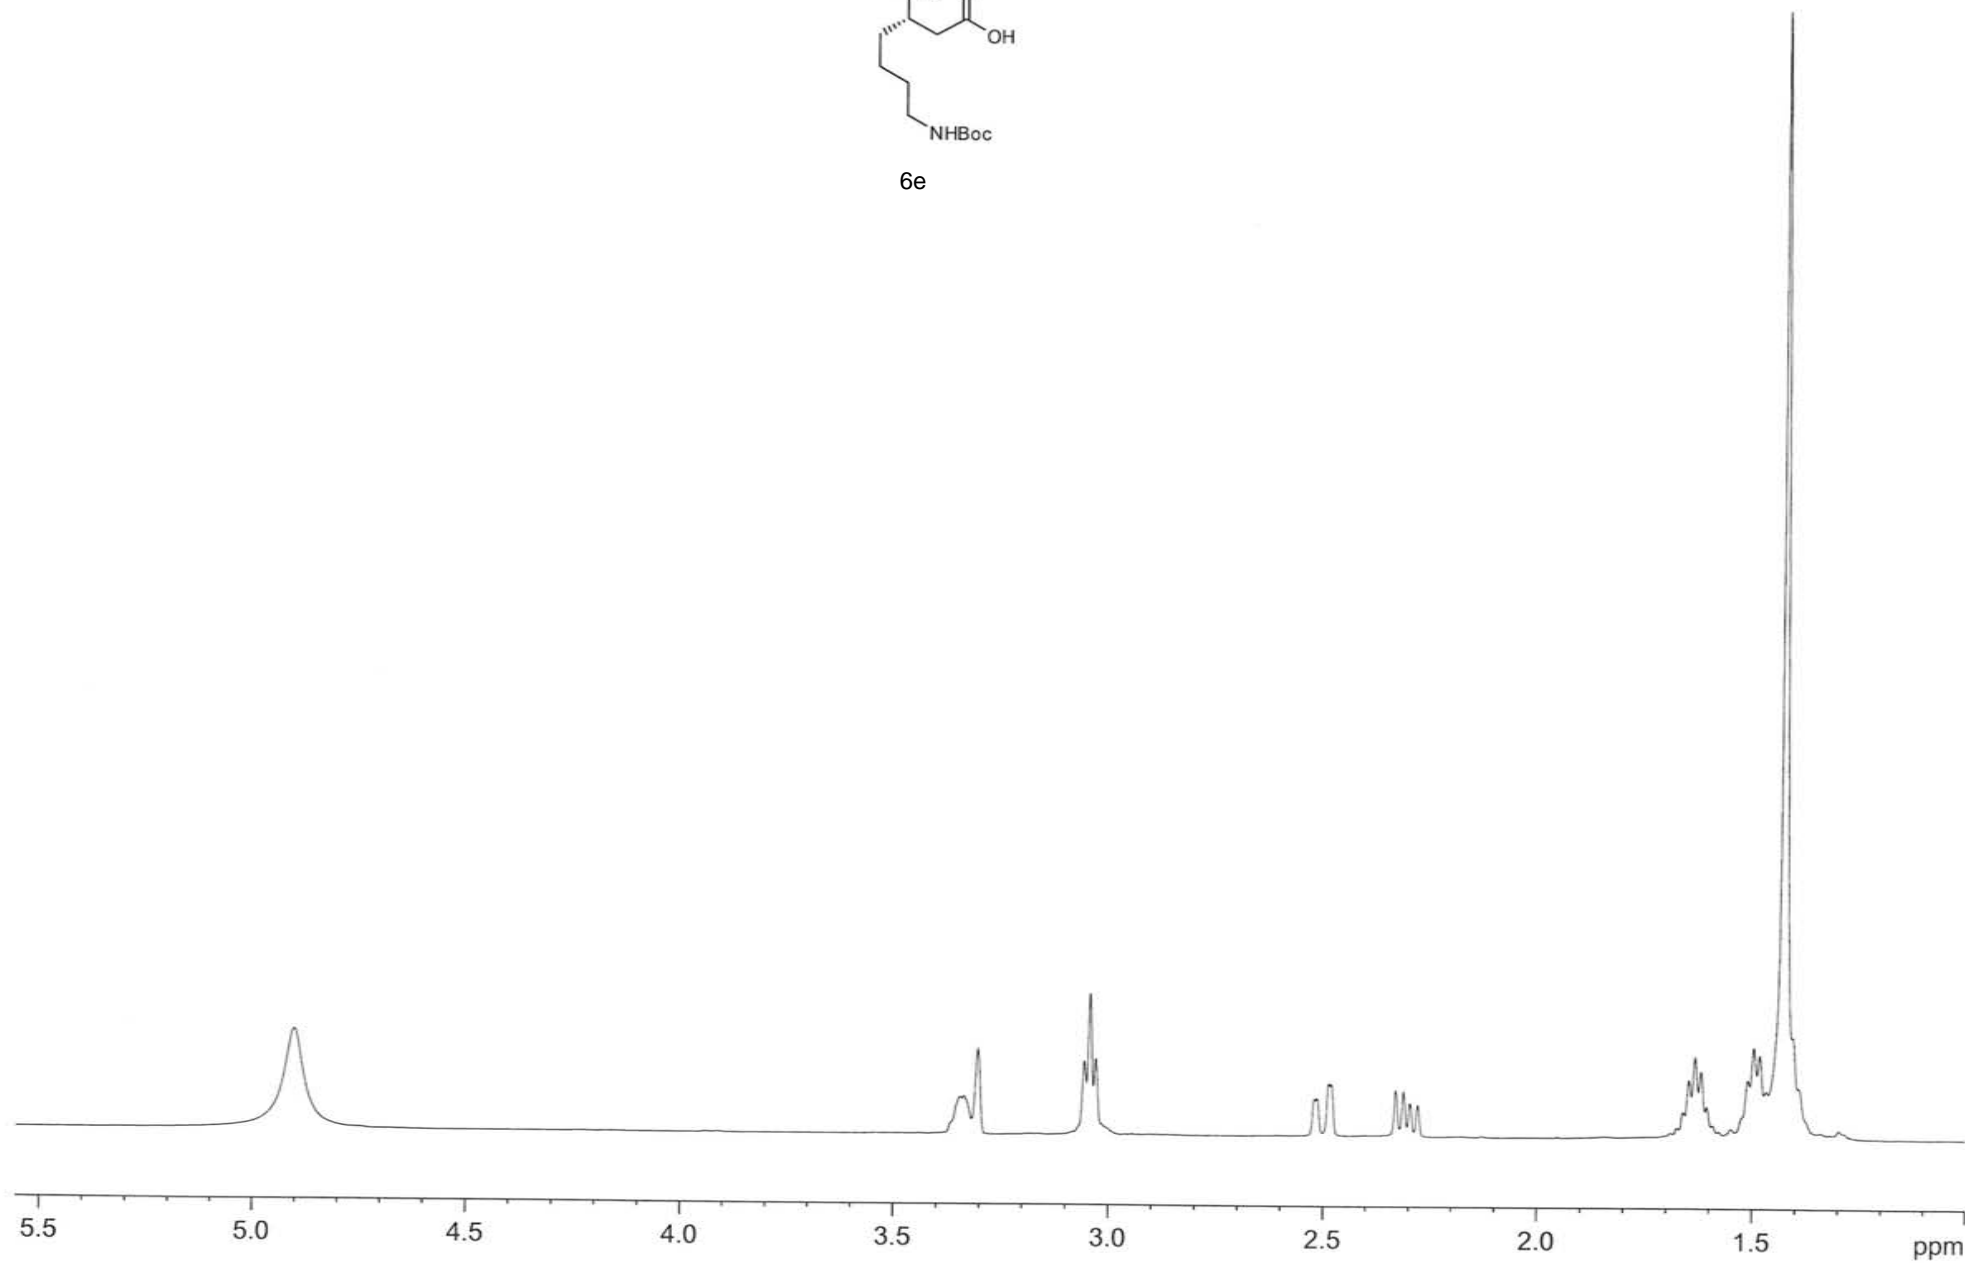

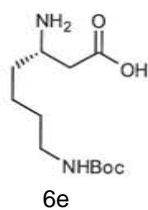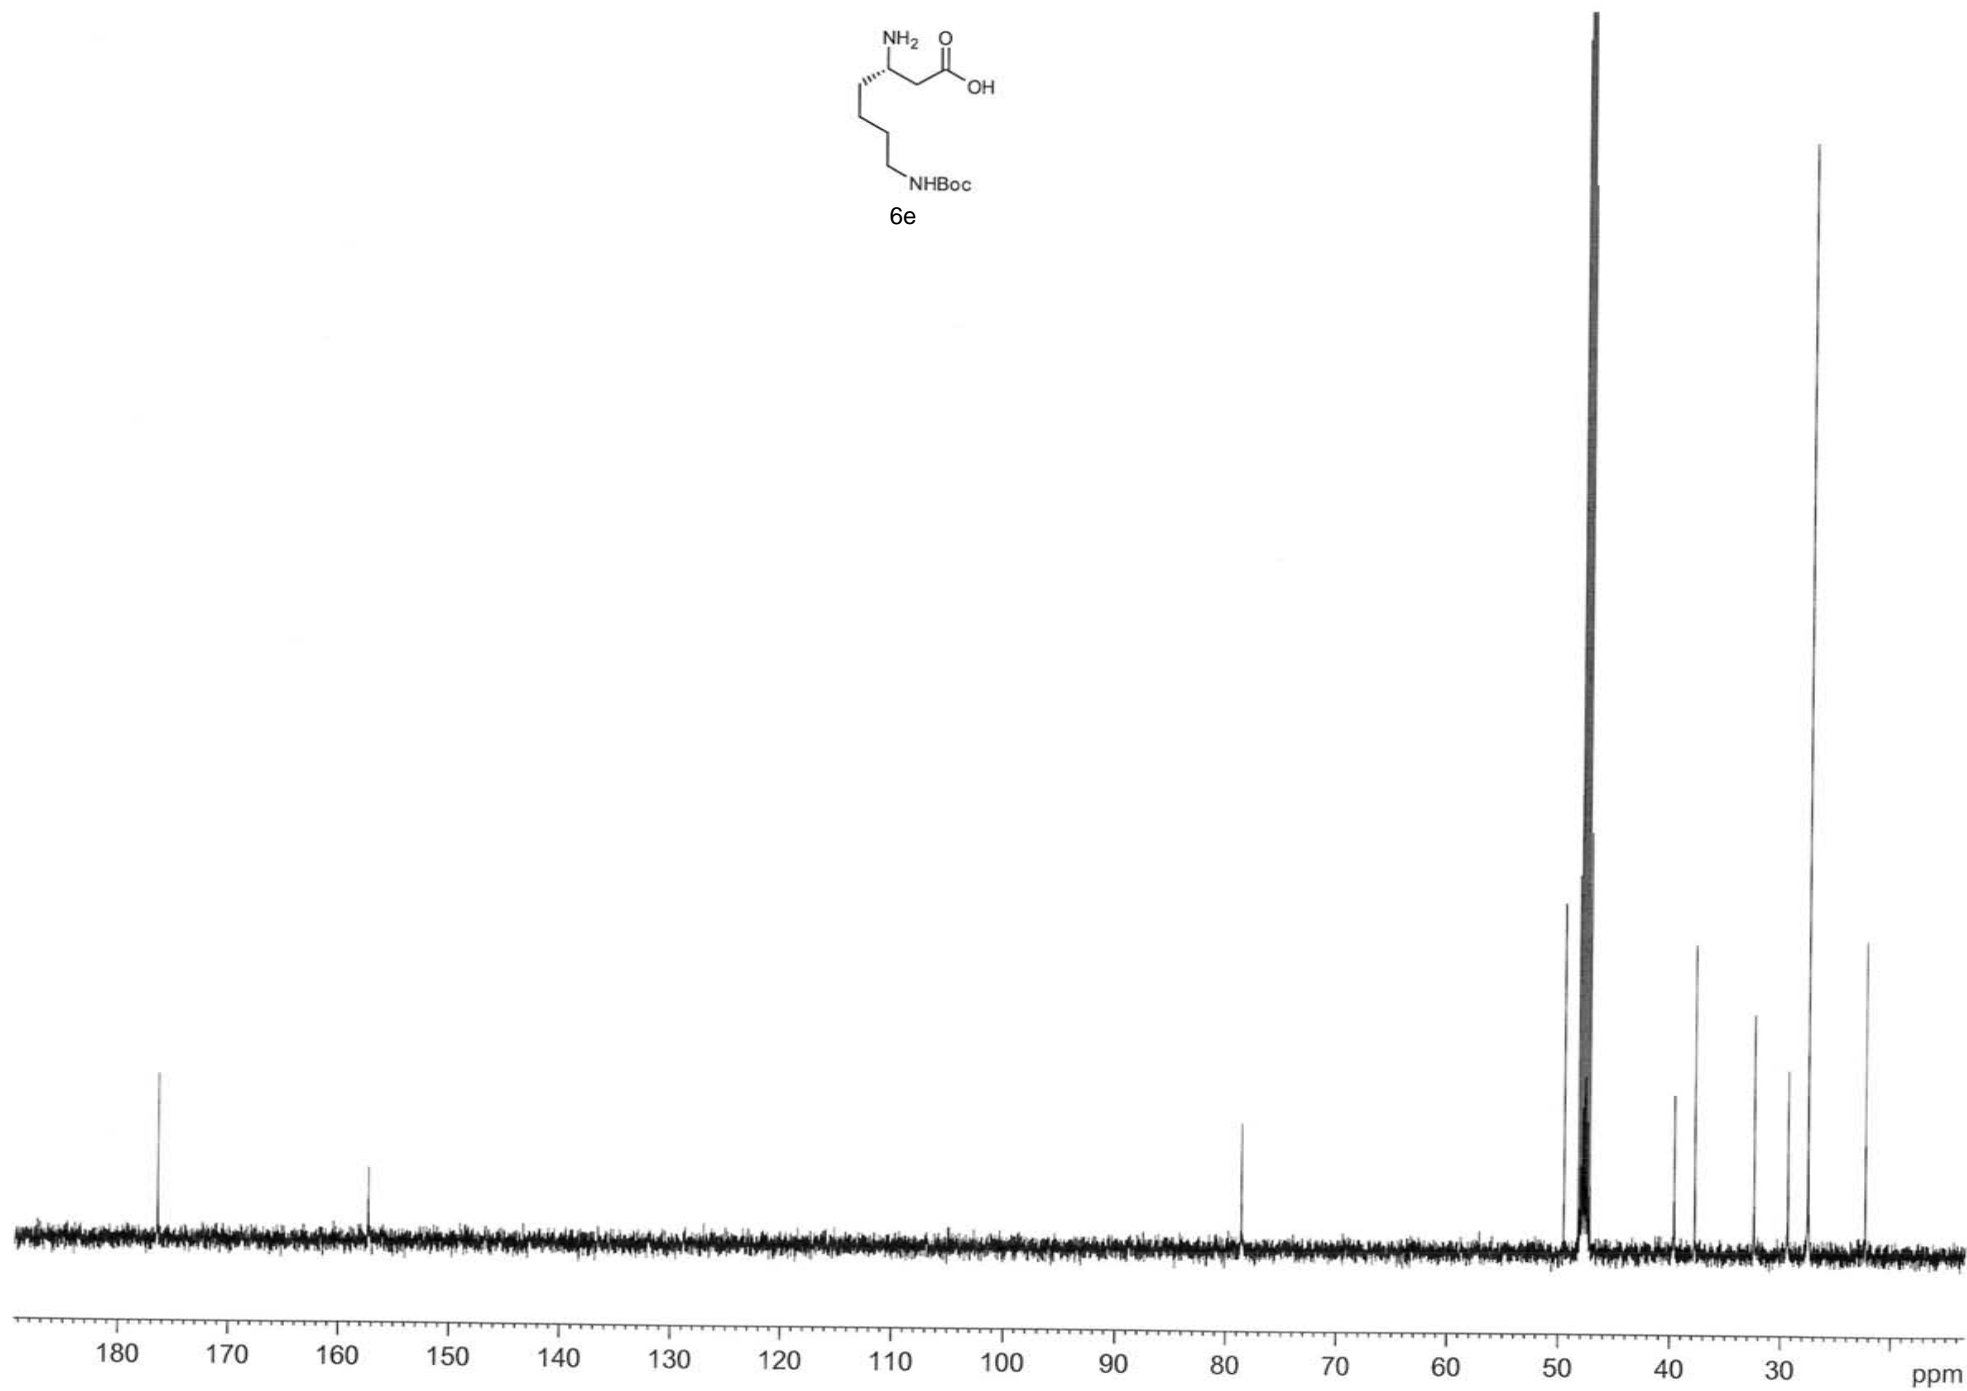

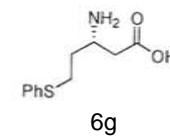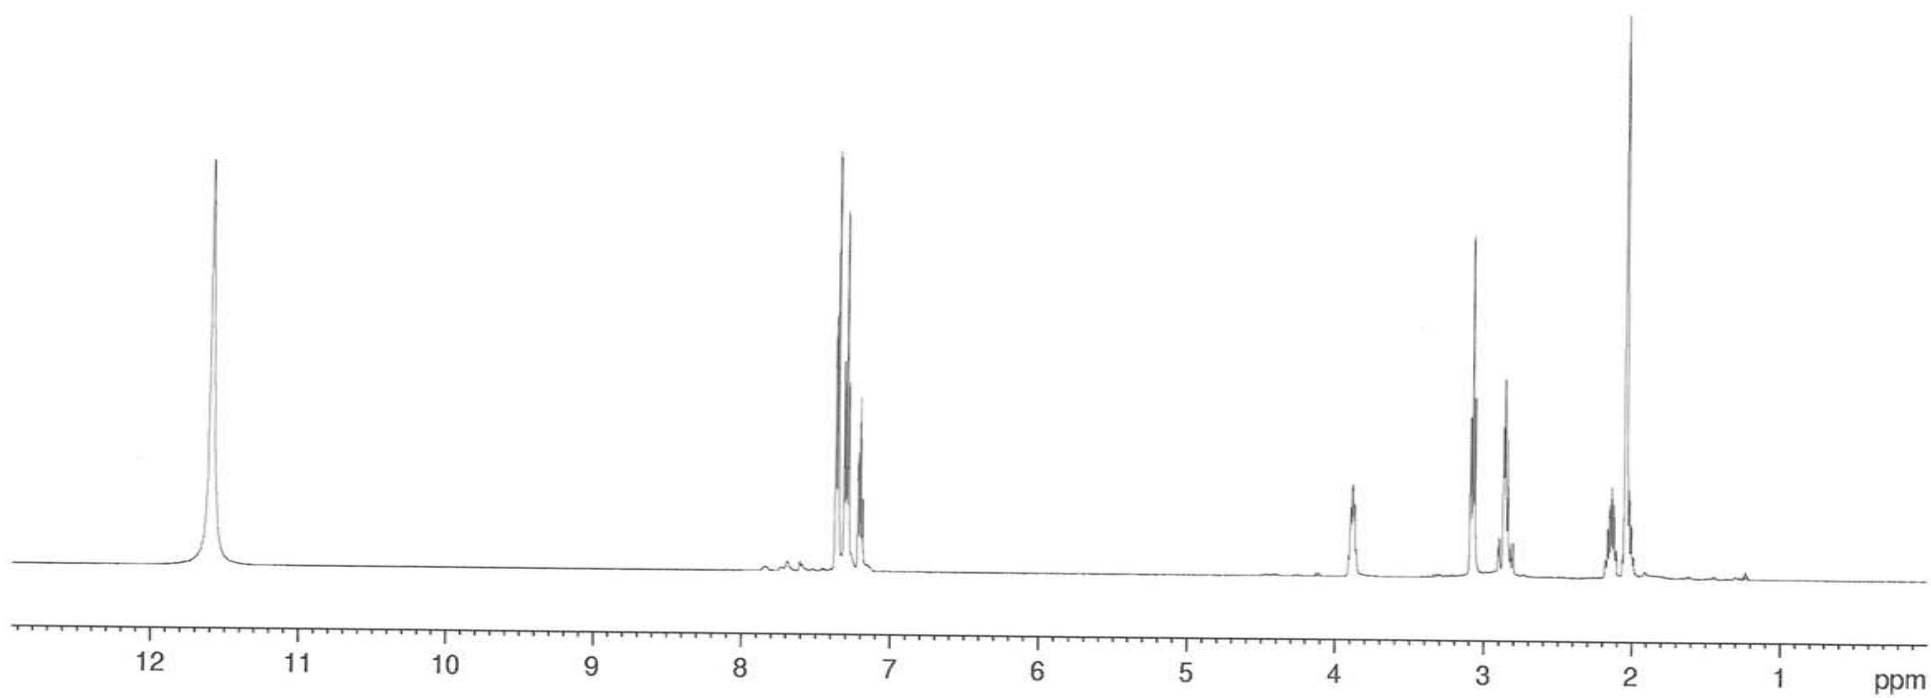

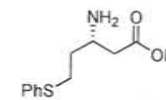

6g

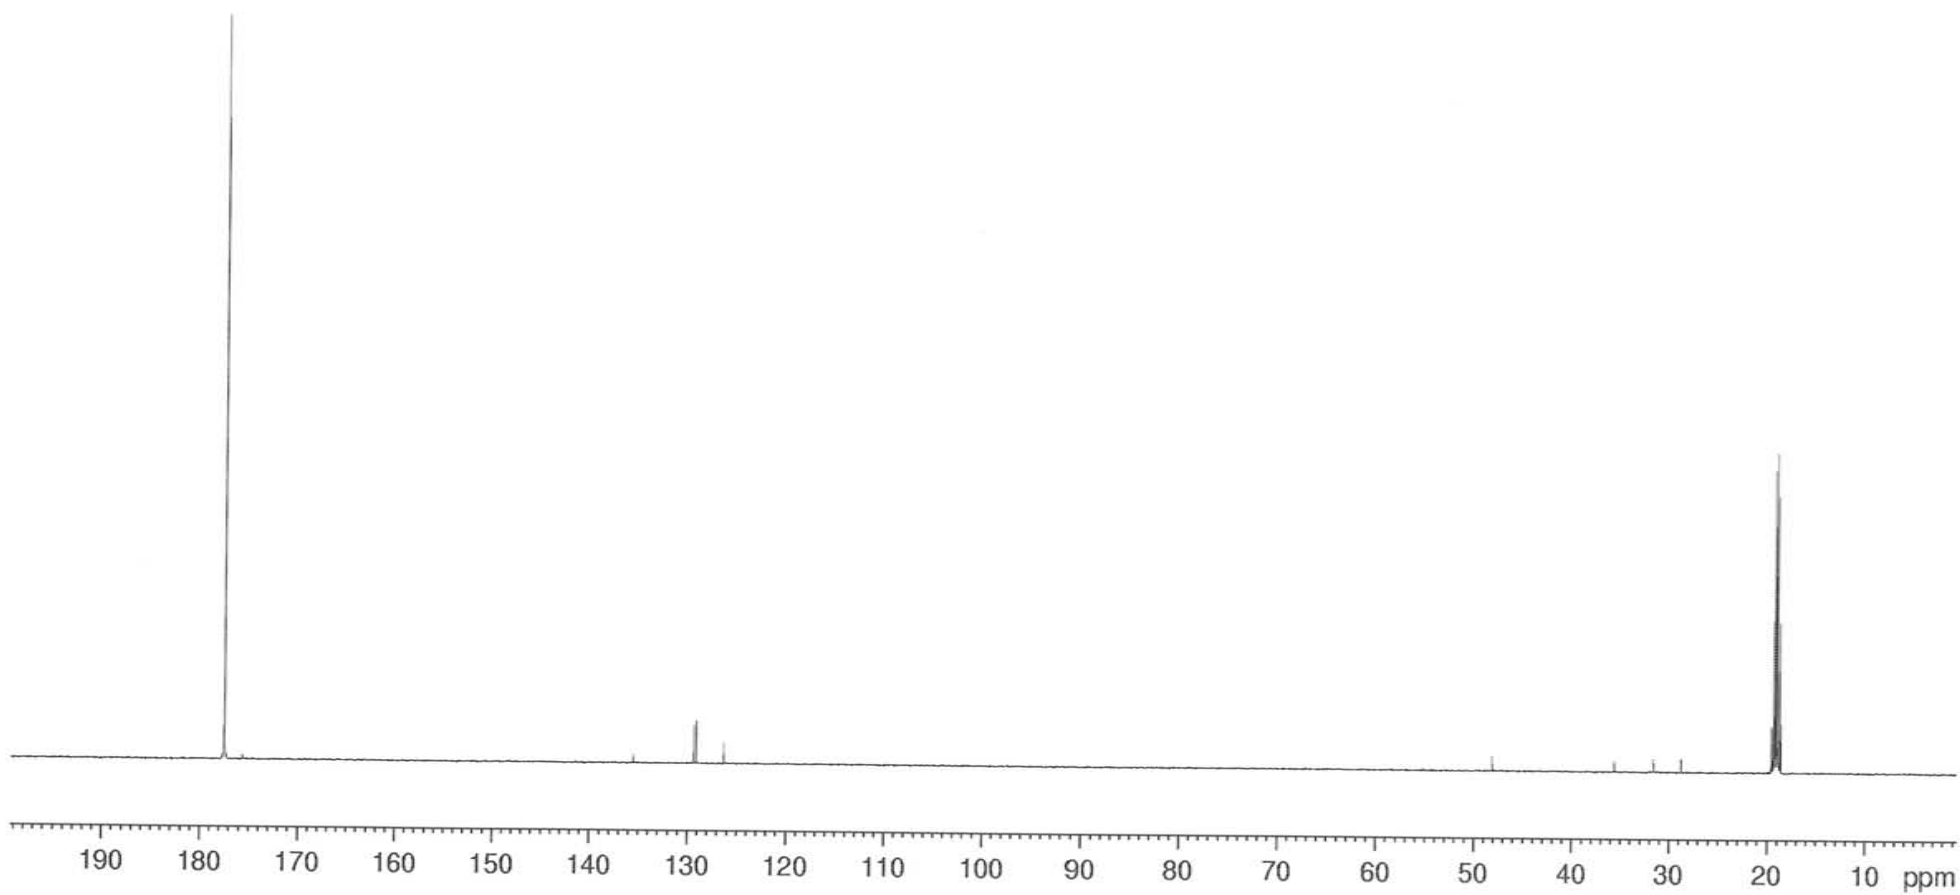

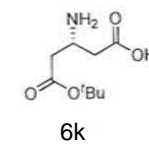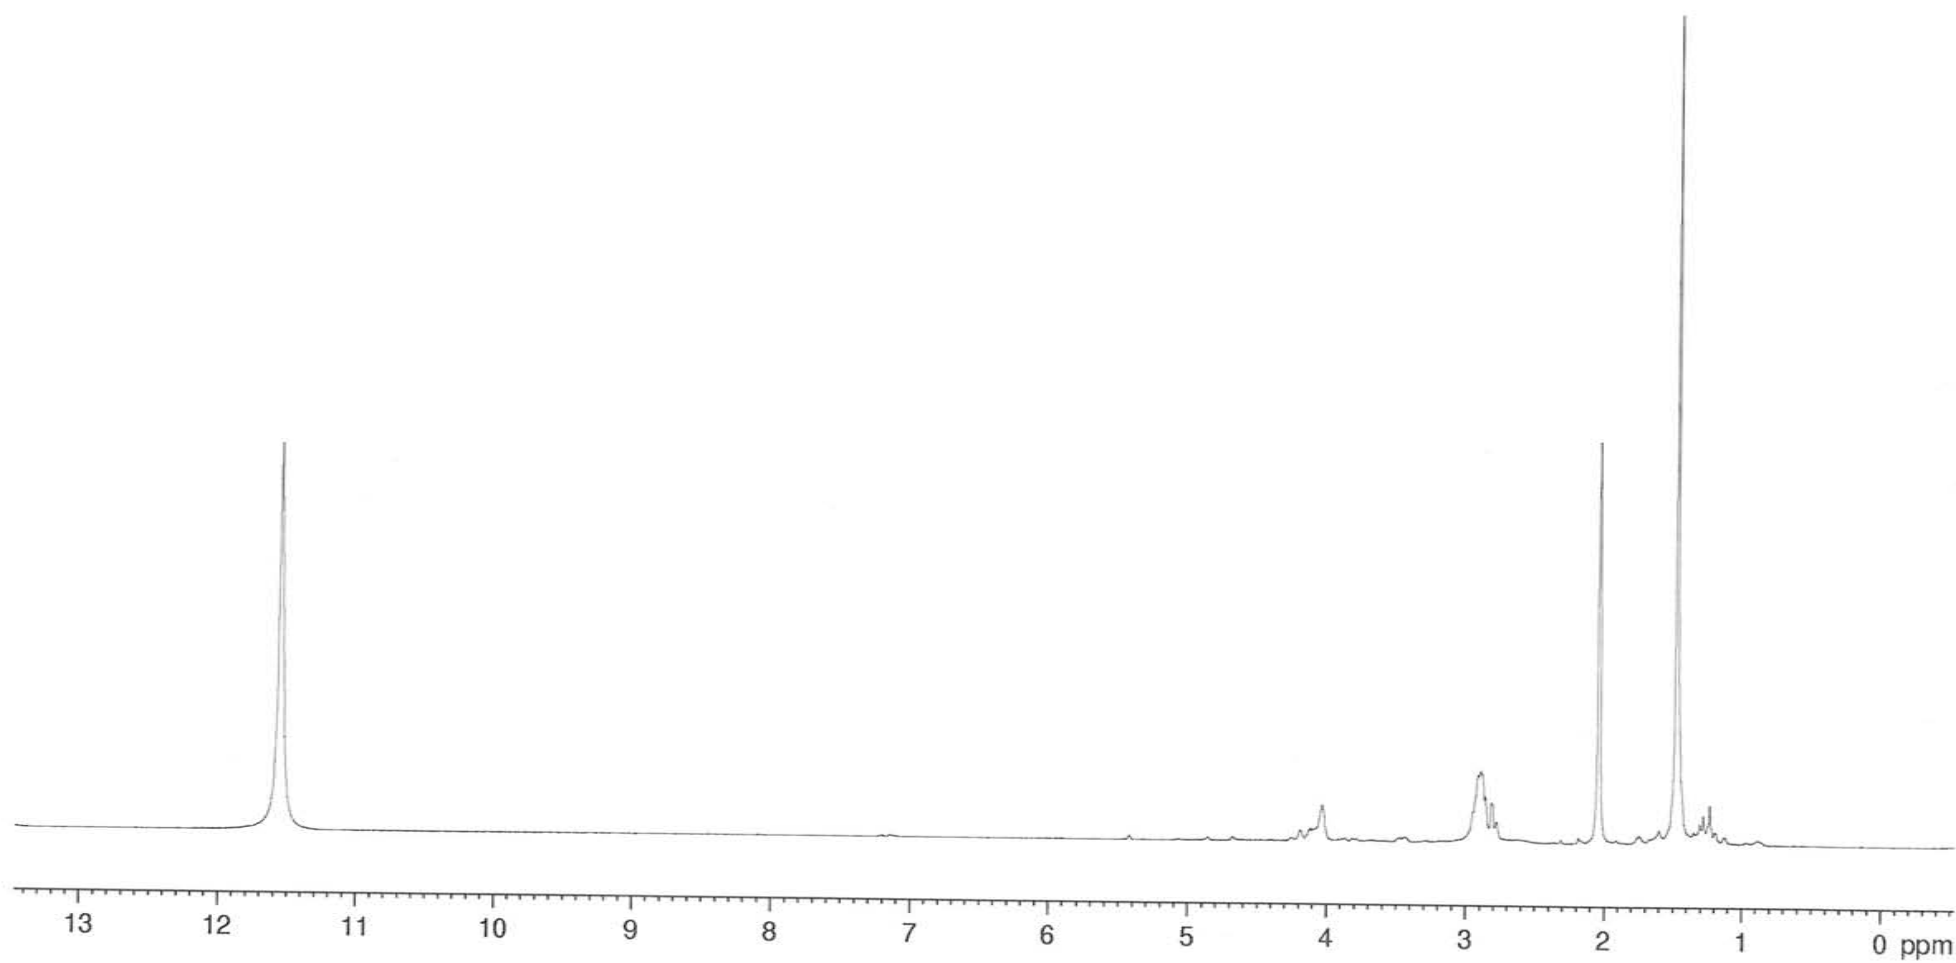

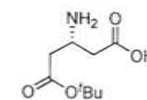

6k

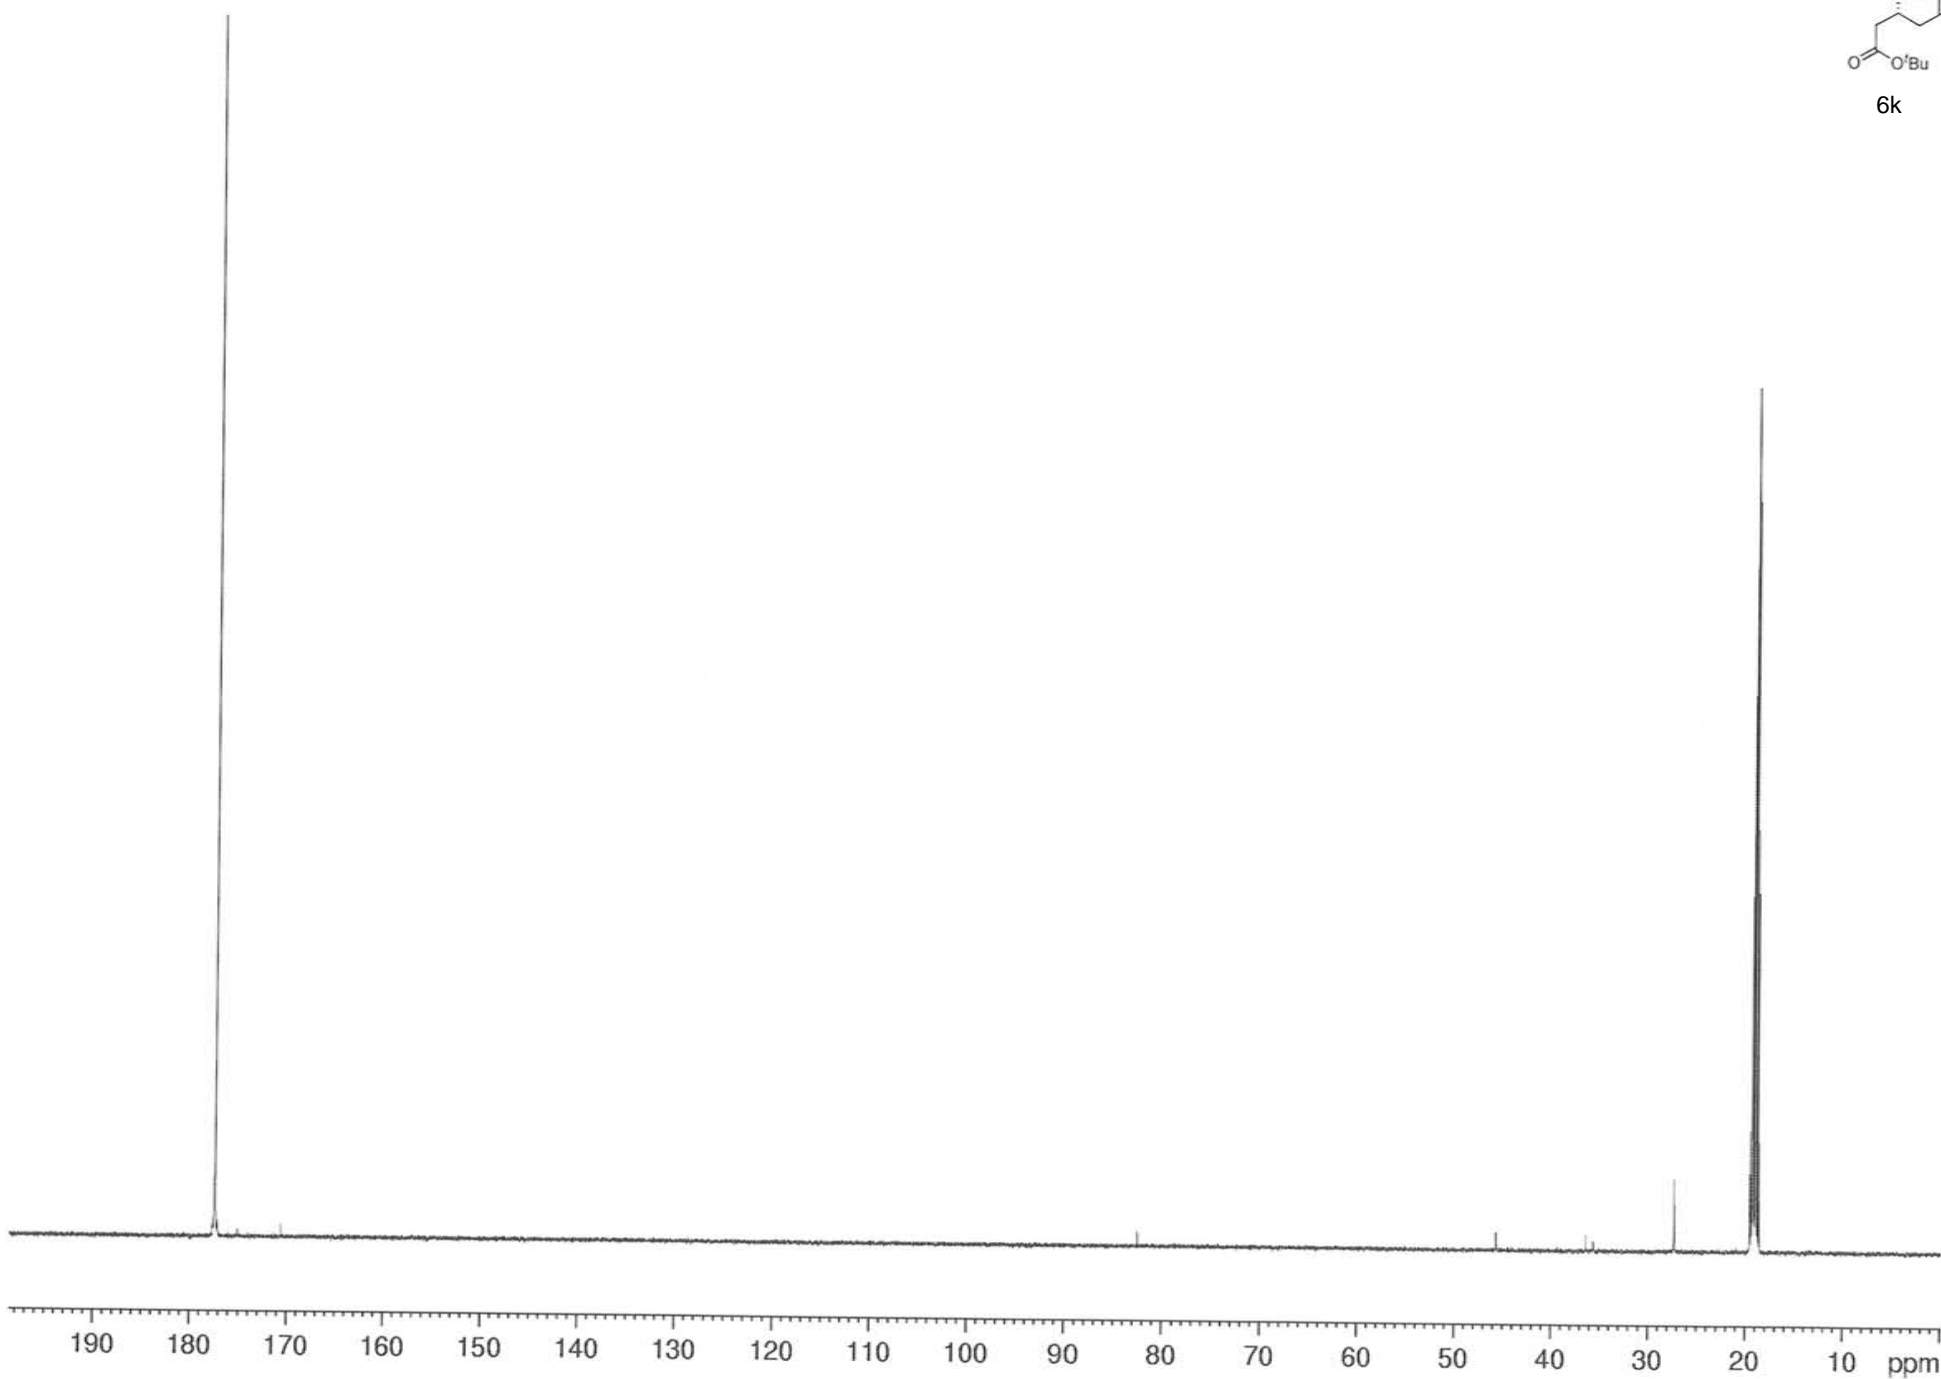



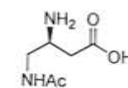

6n

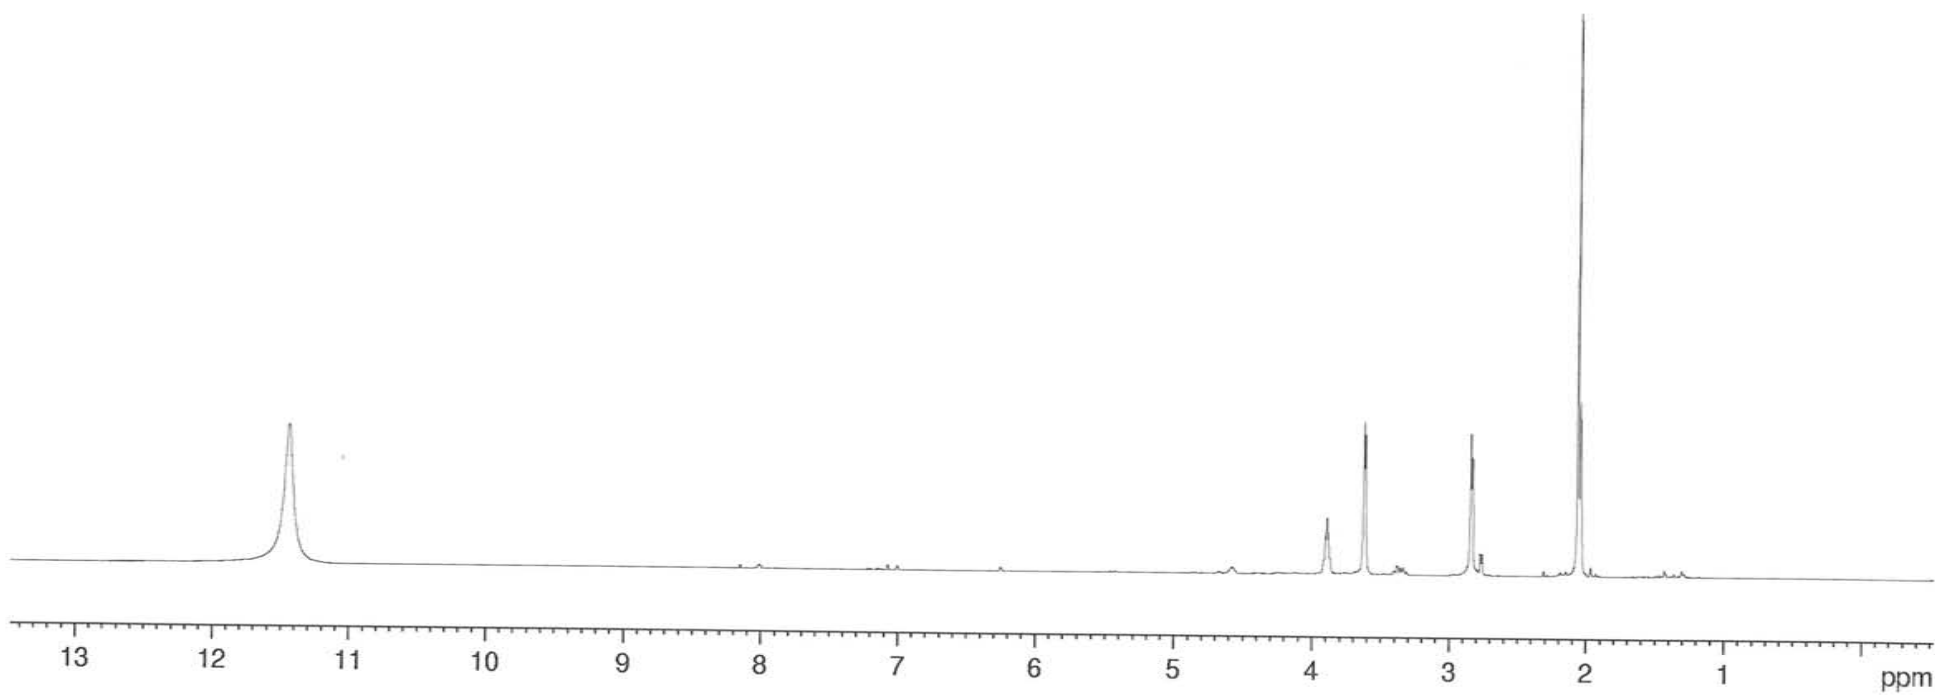

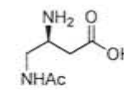

6n

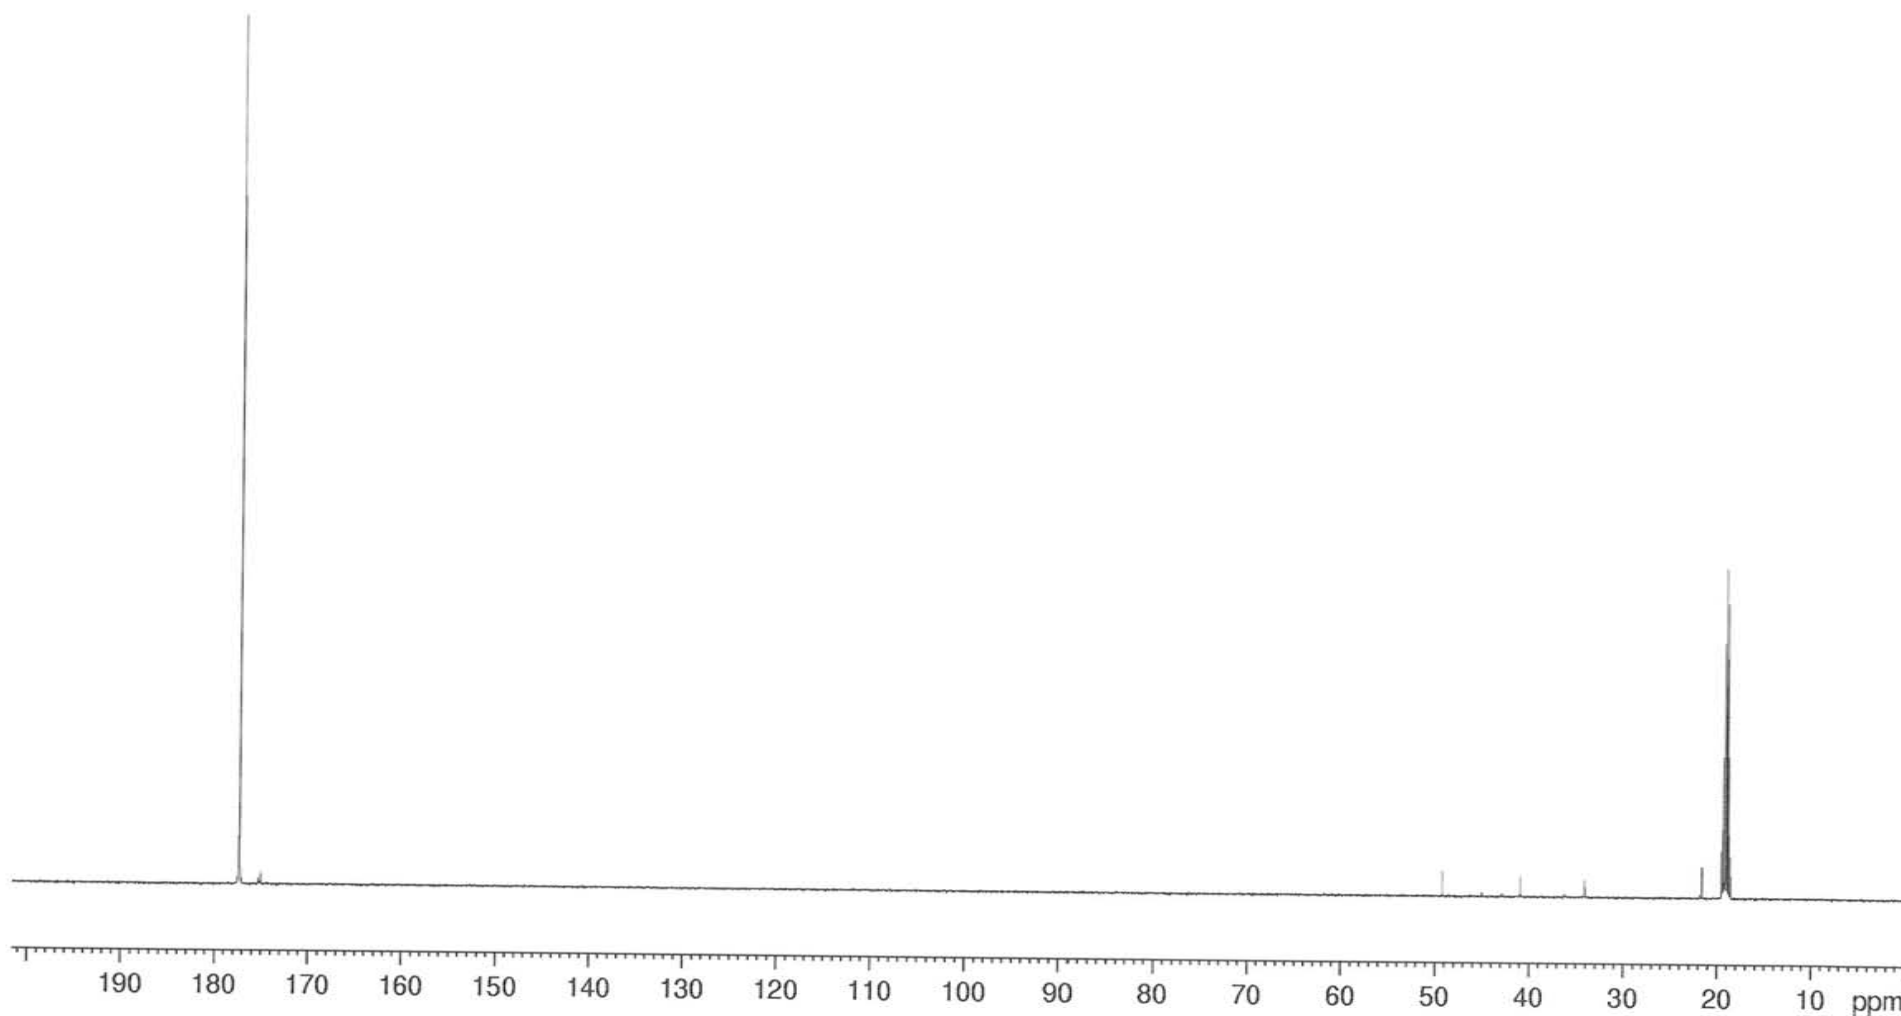

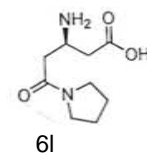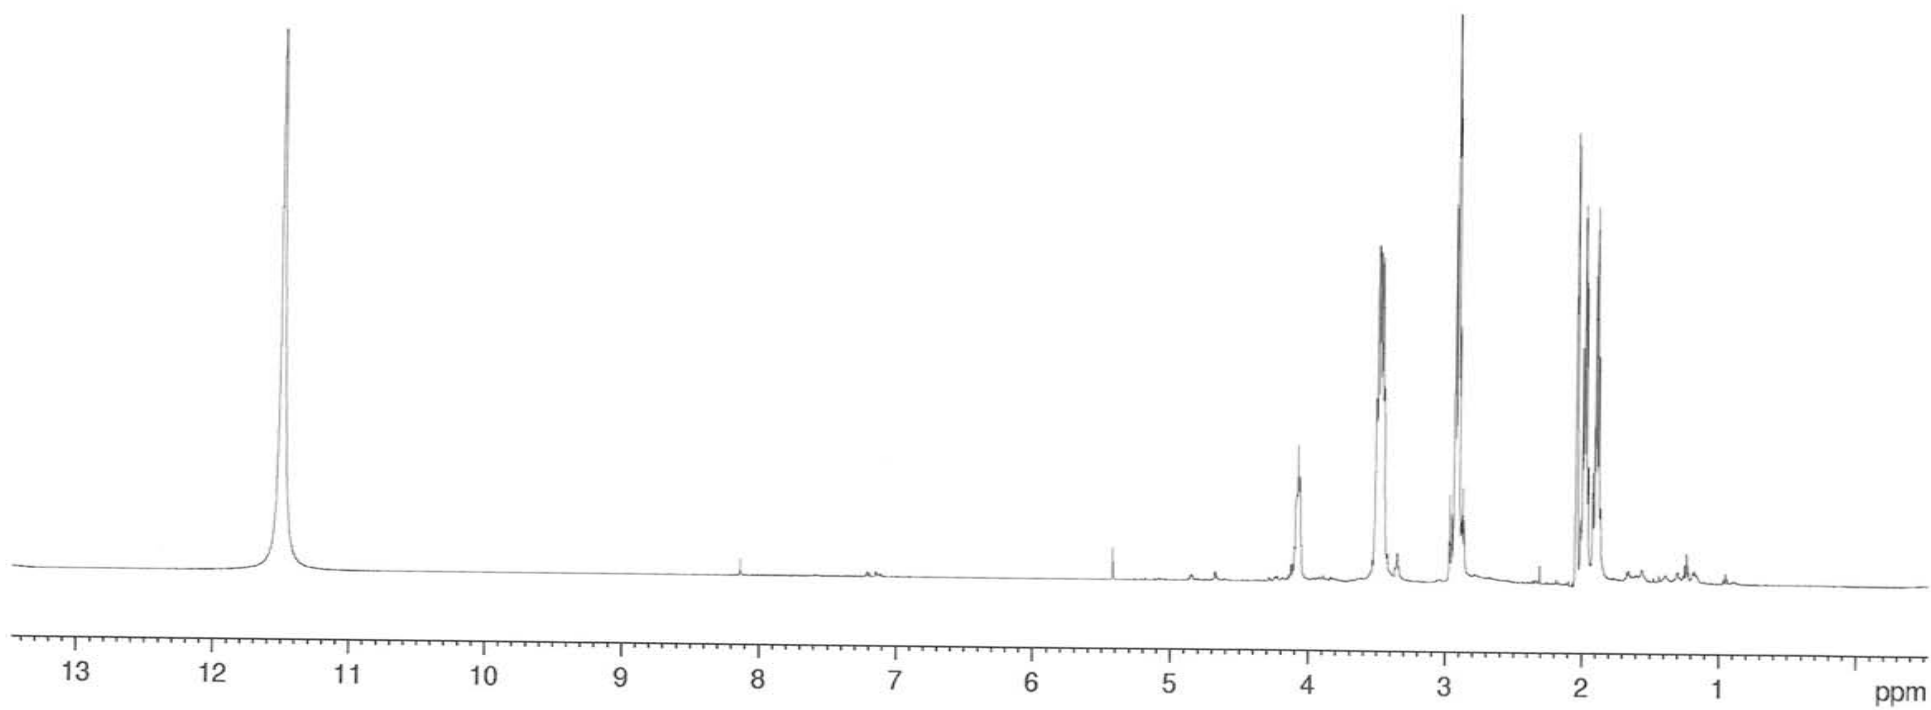

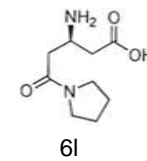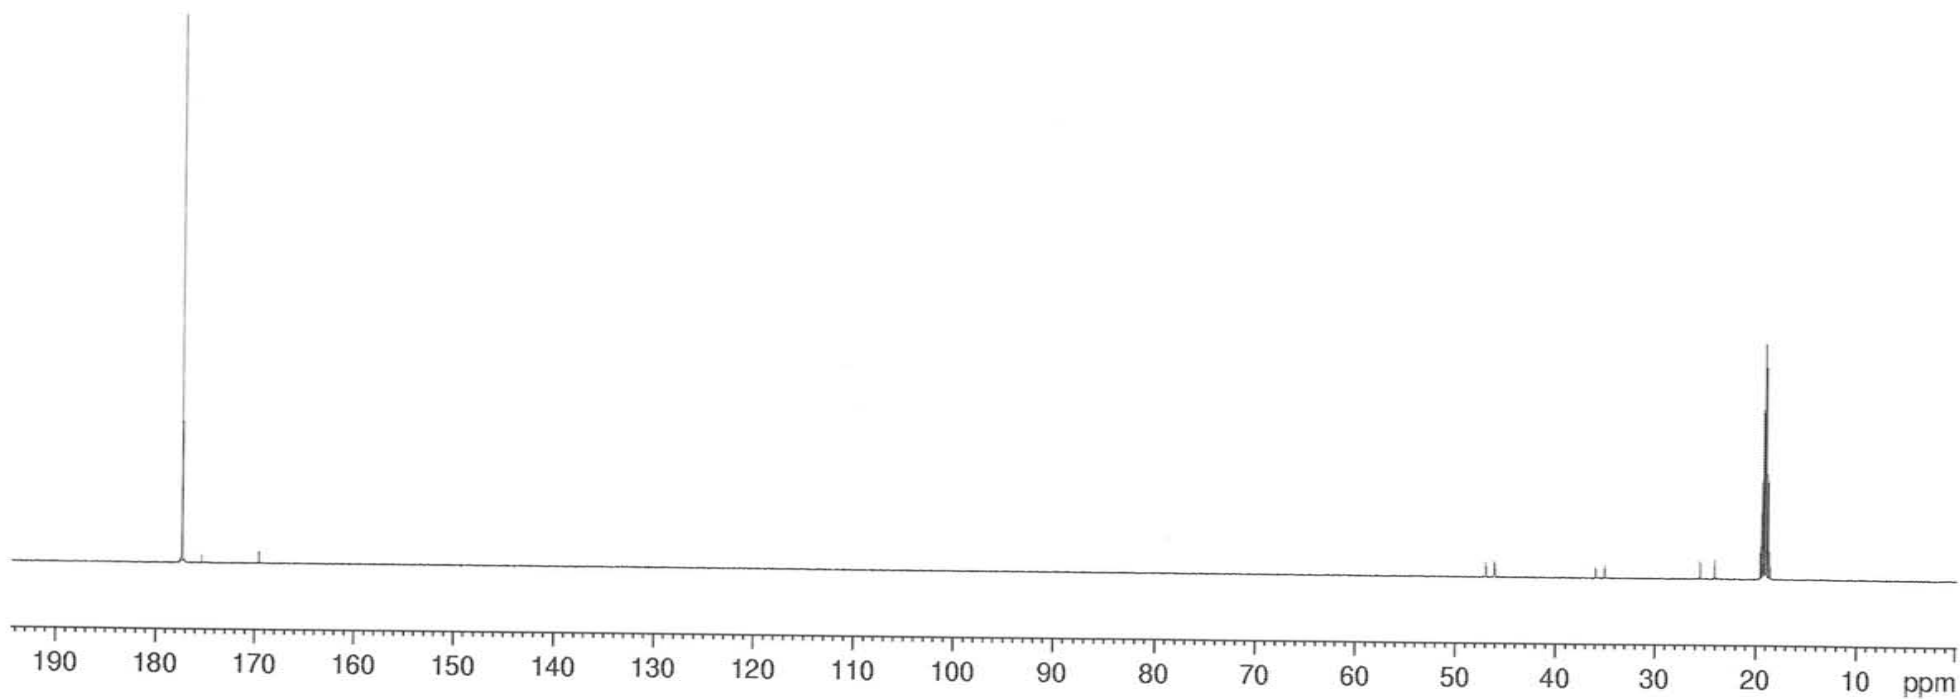

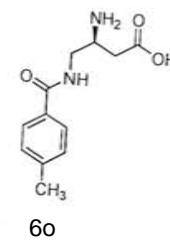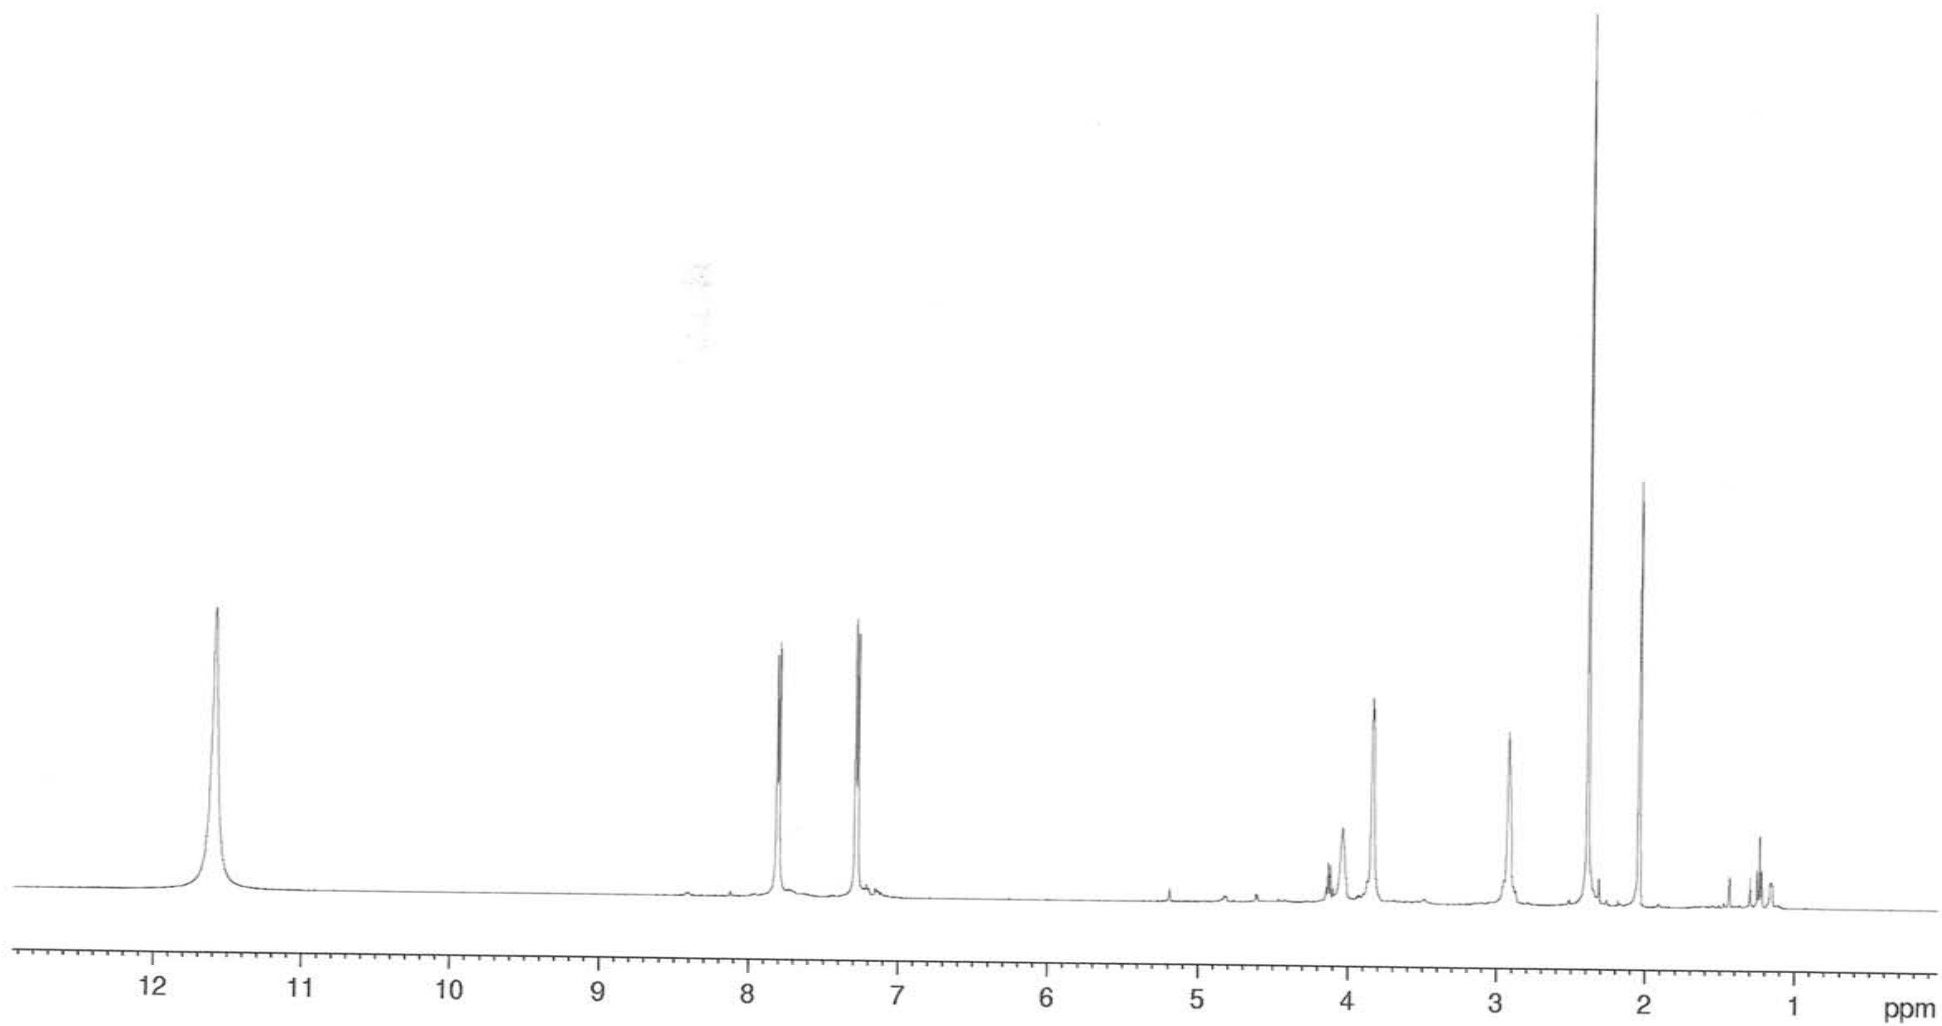

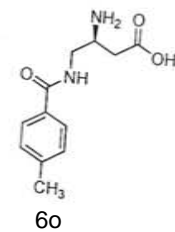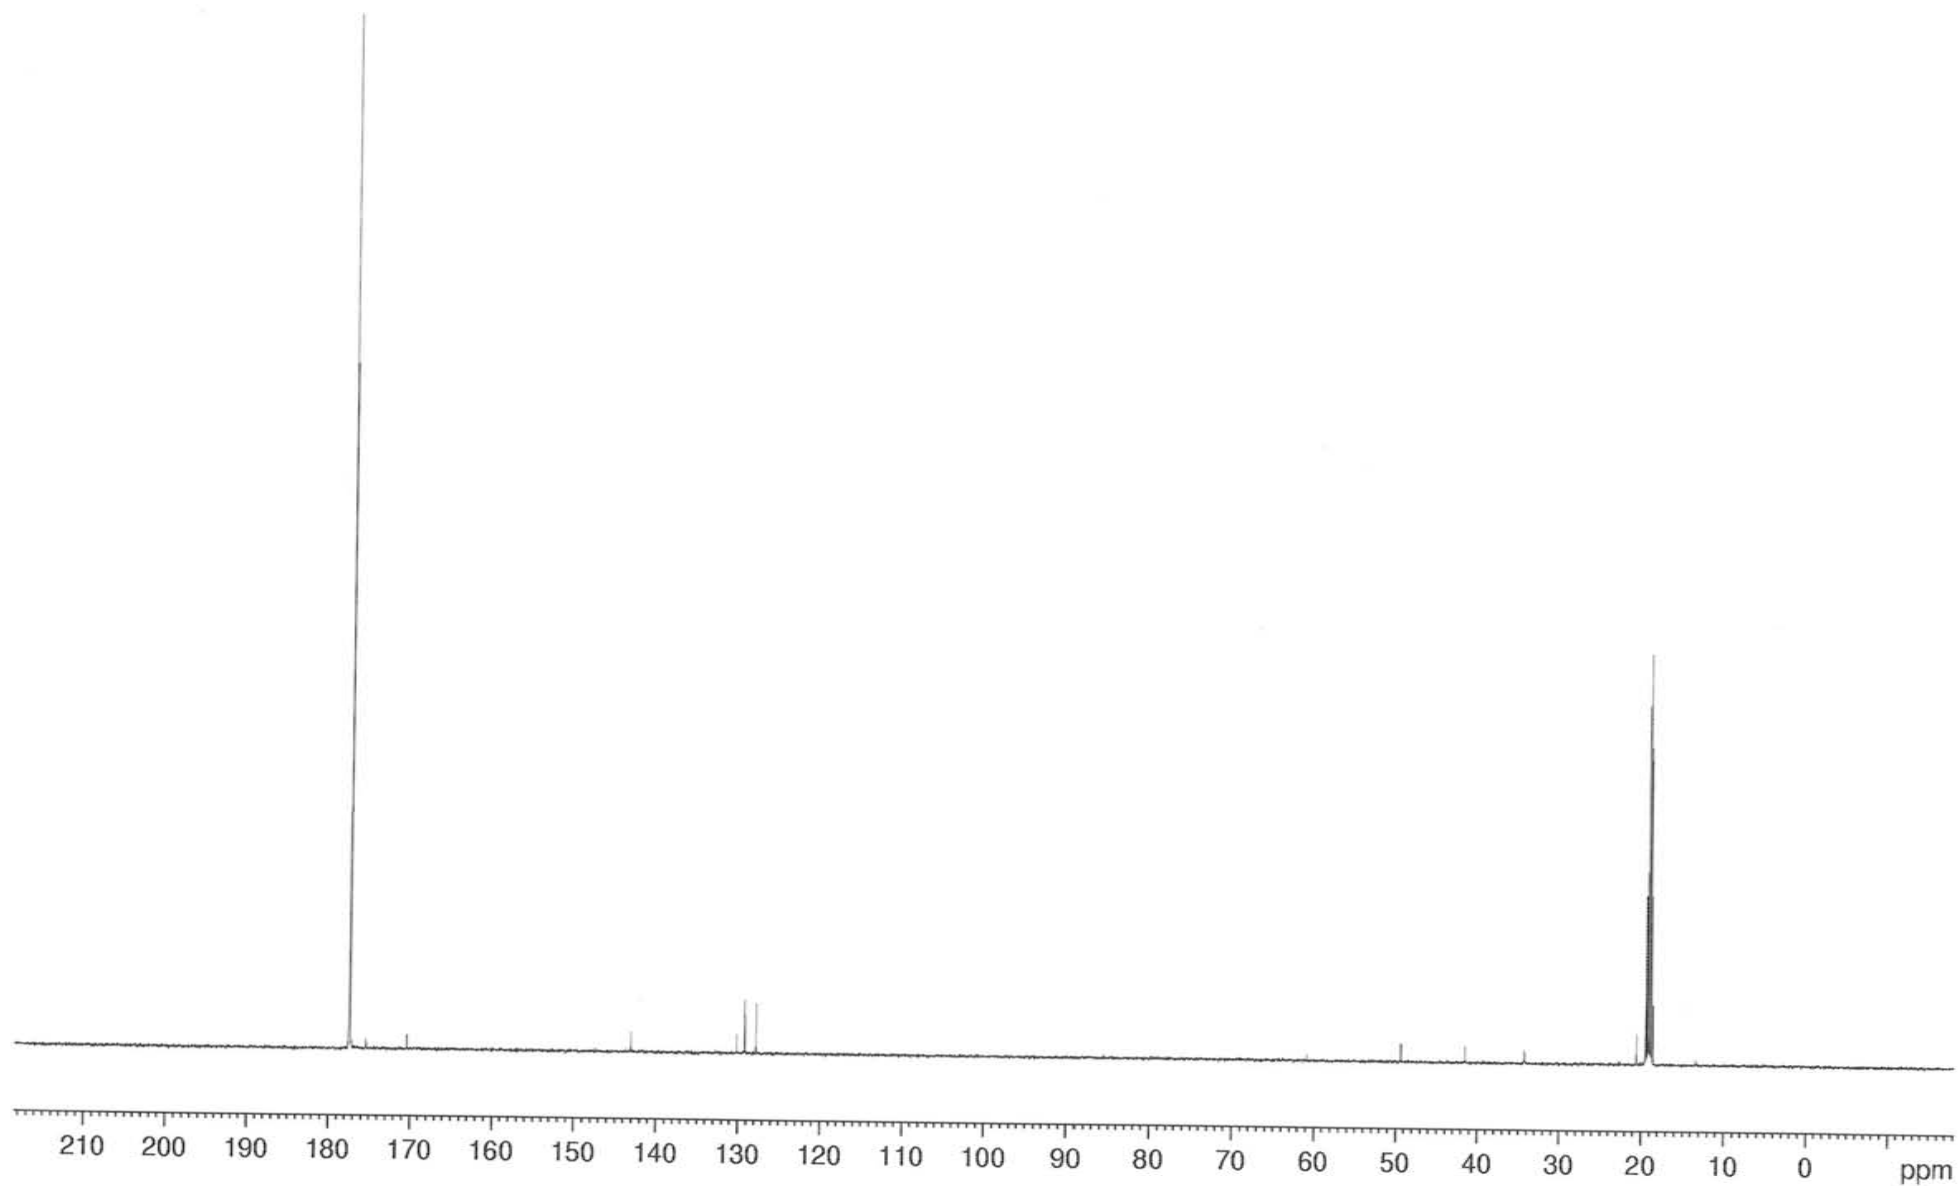

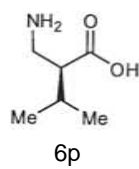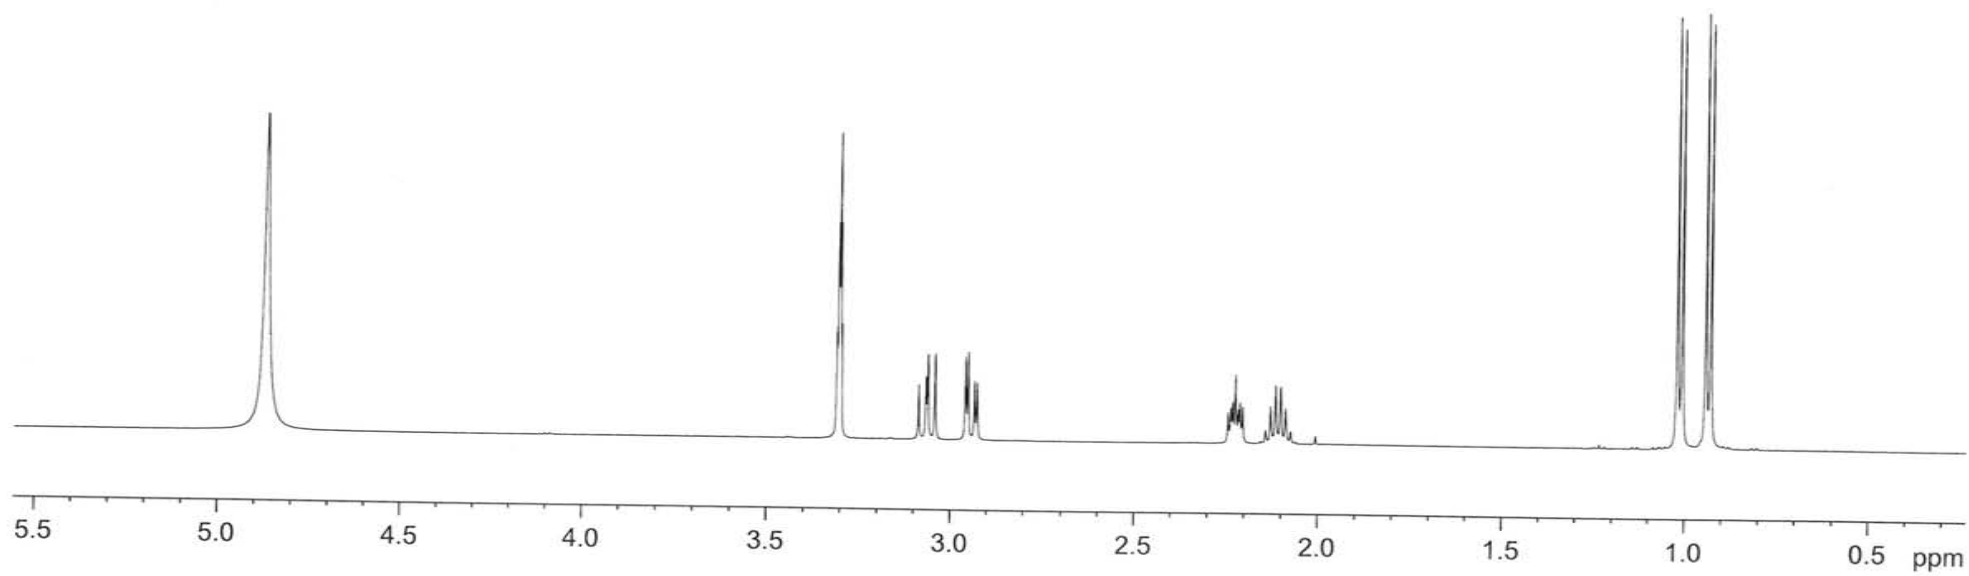

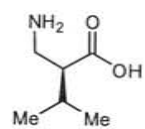

6p

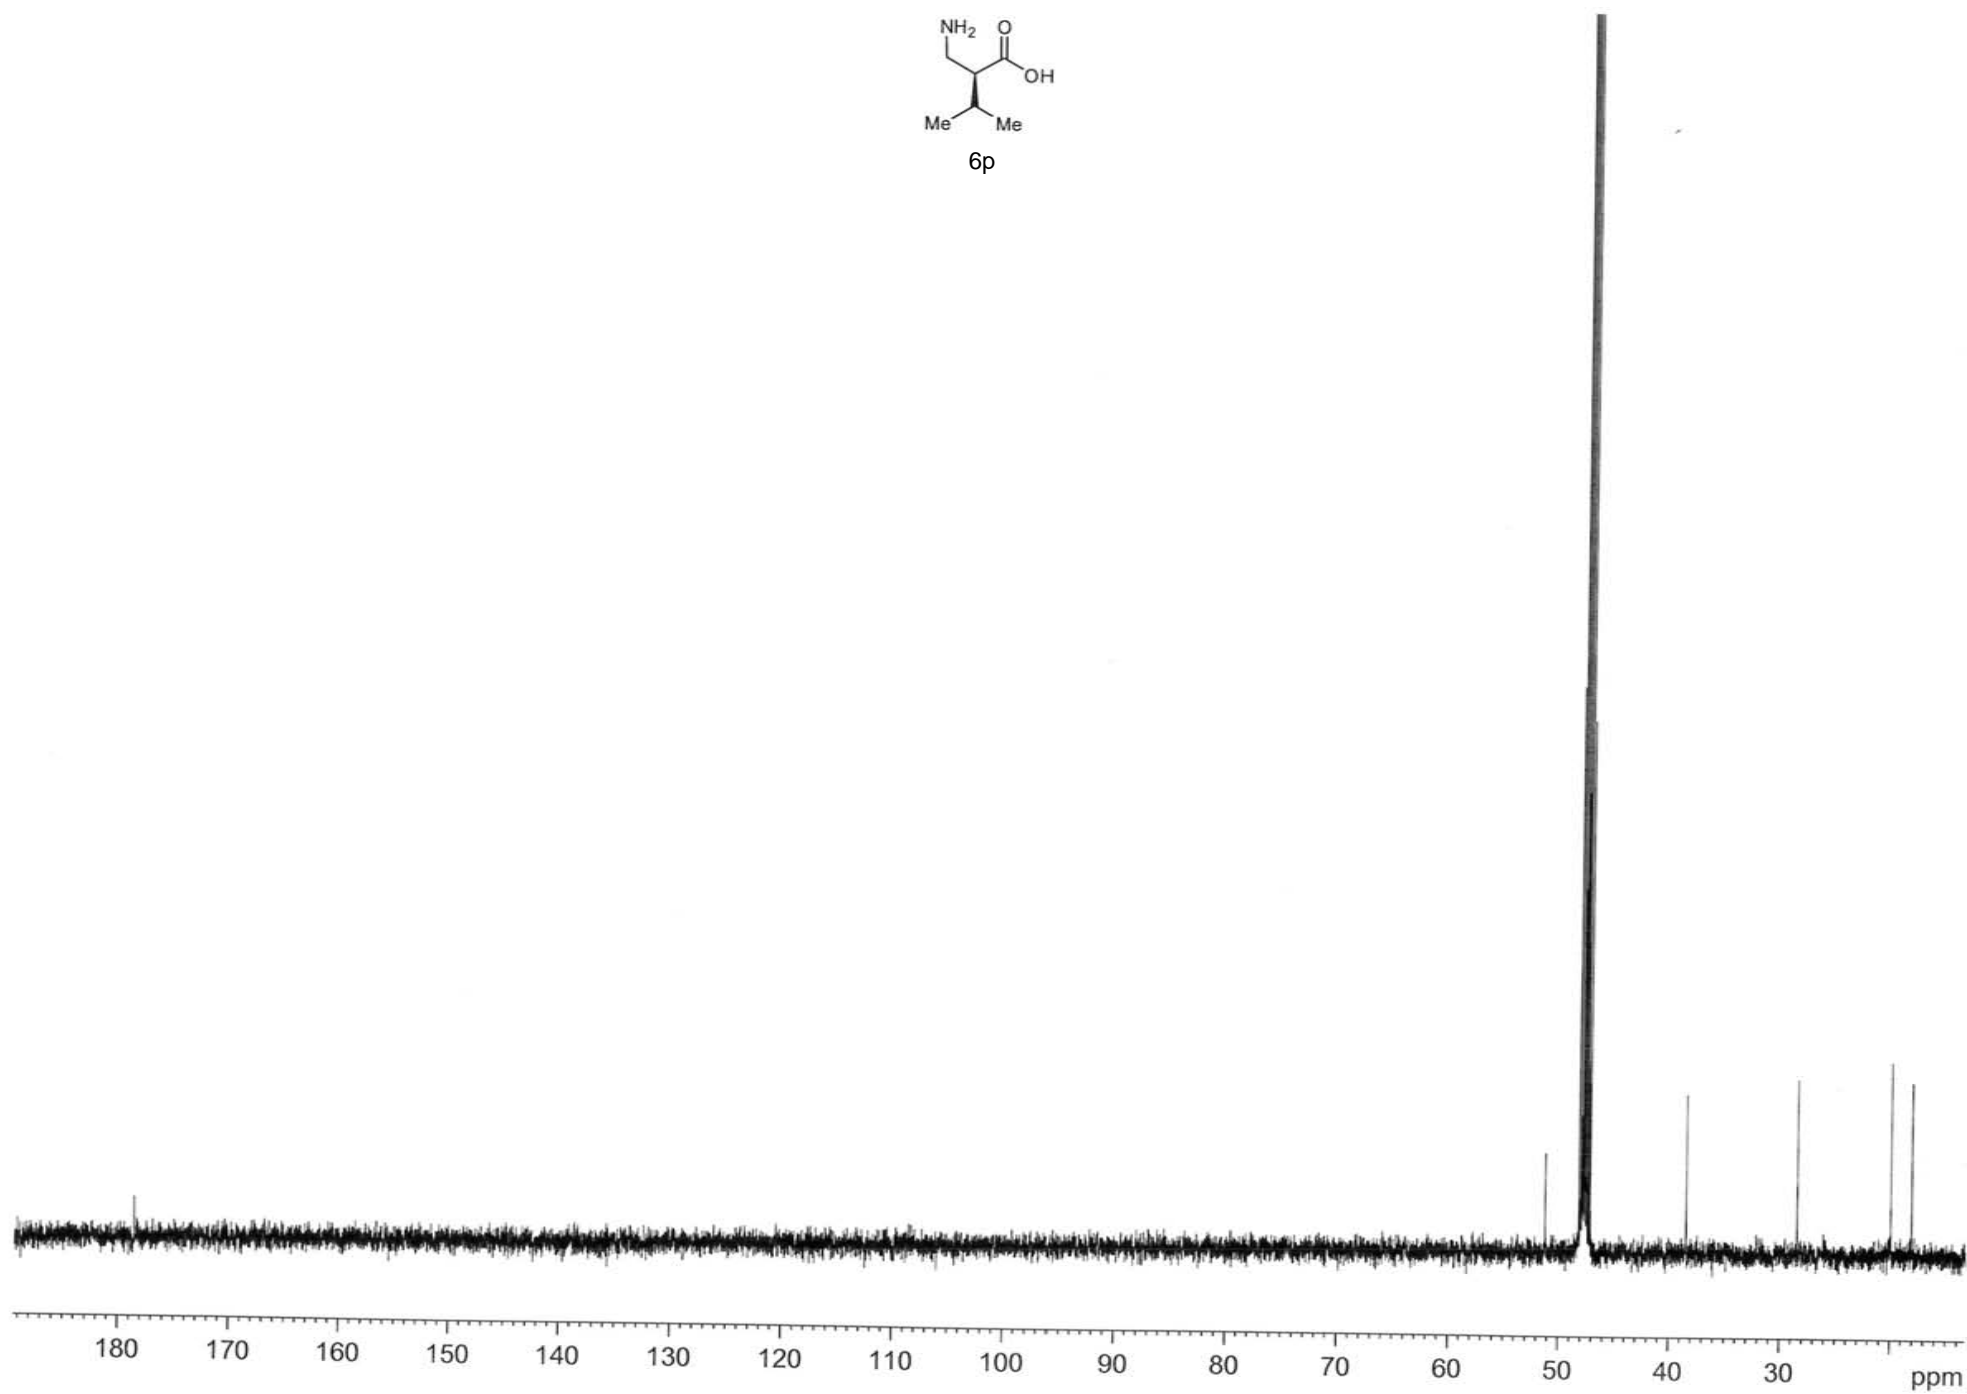



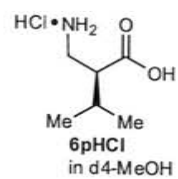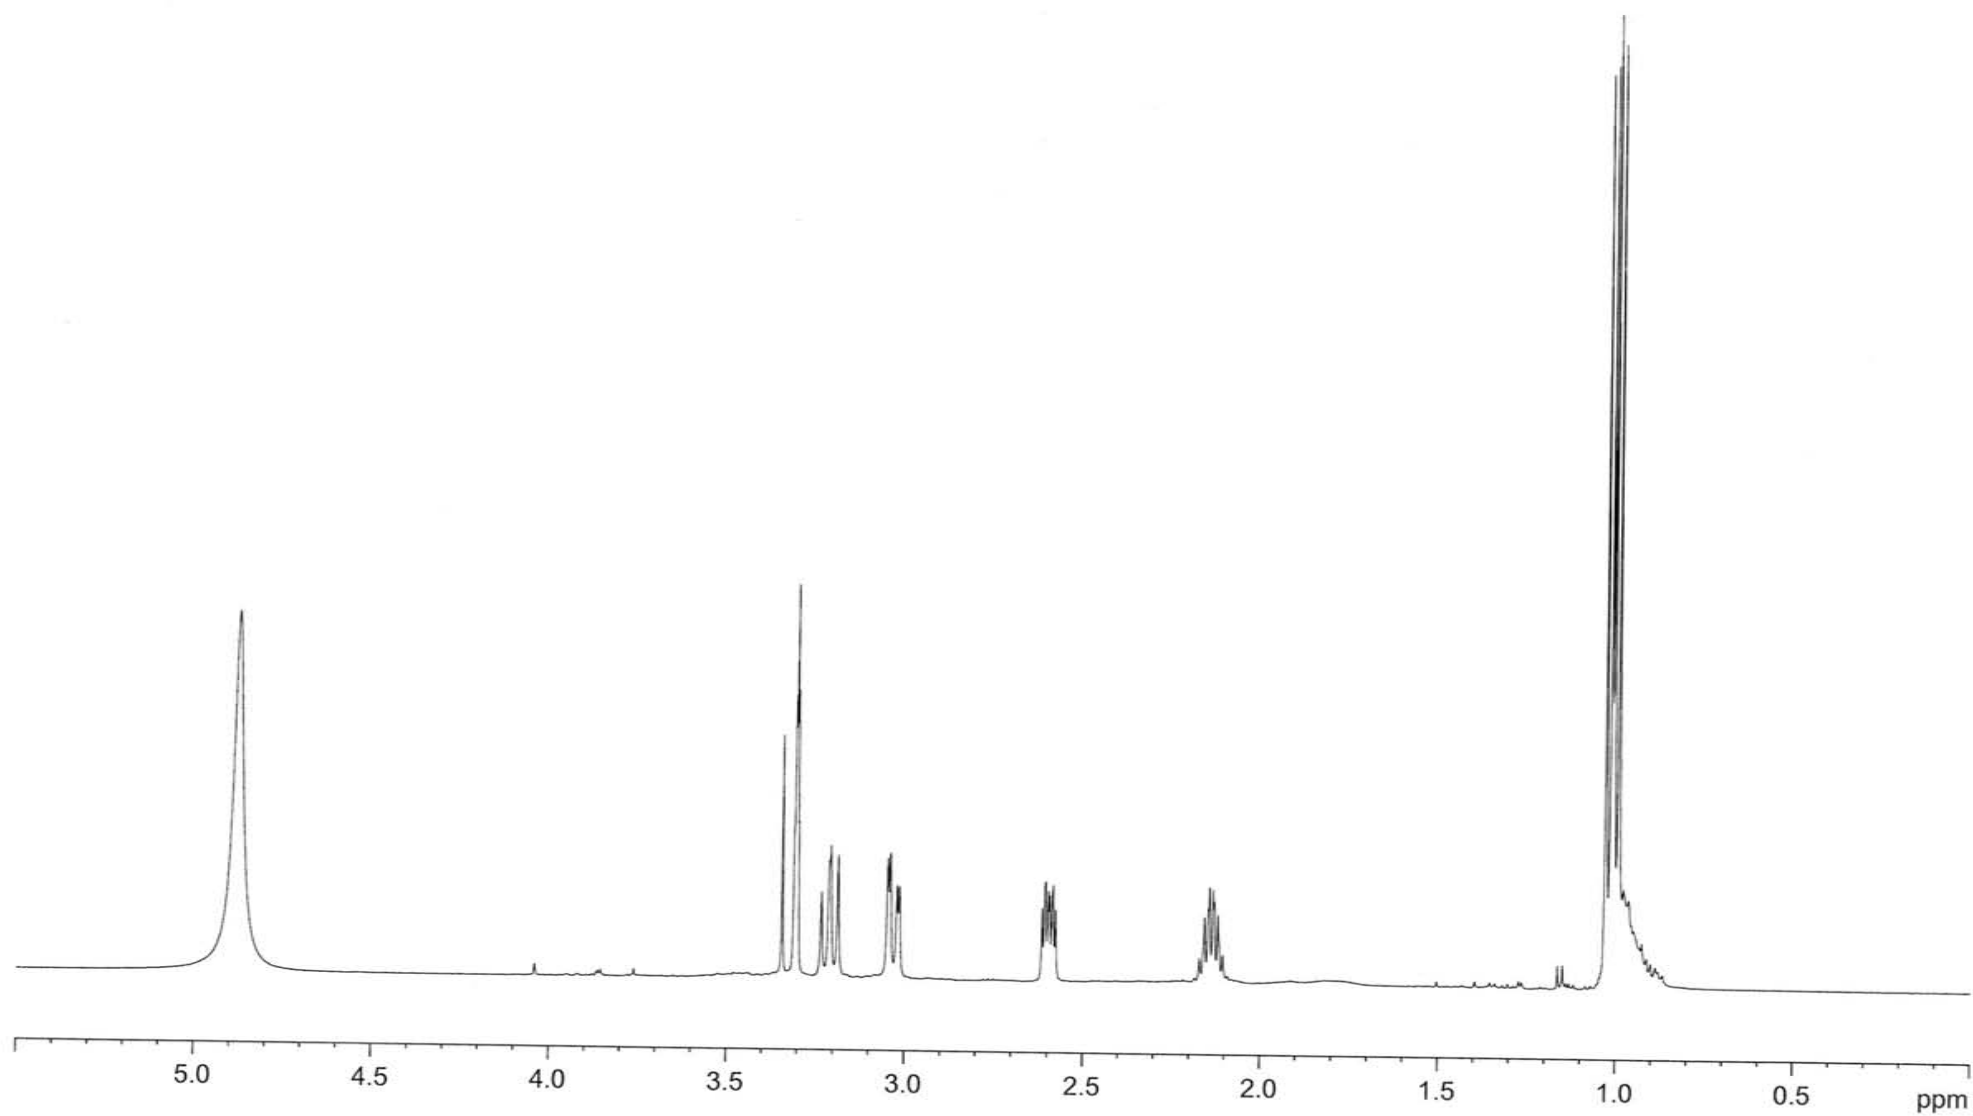

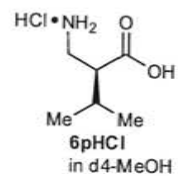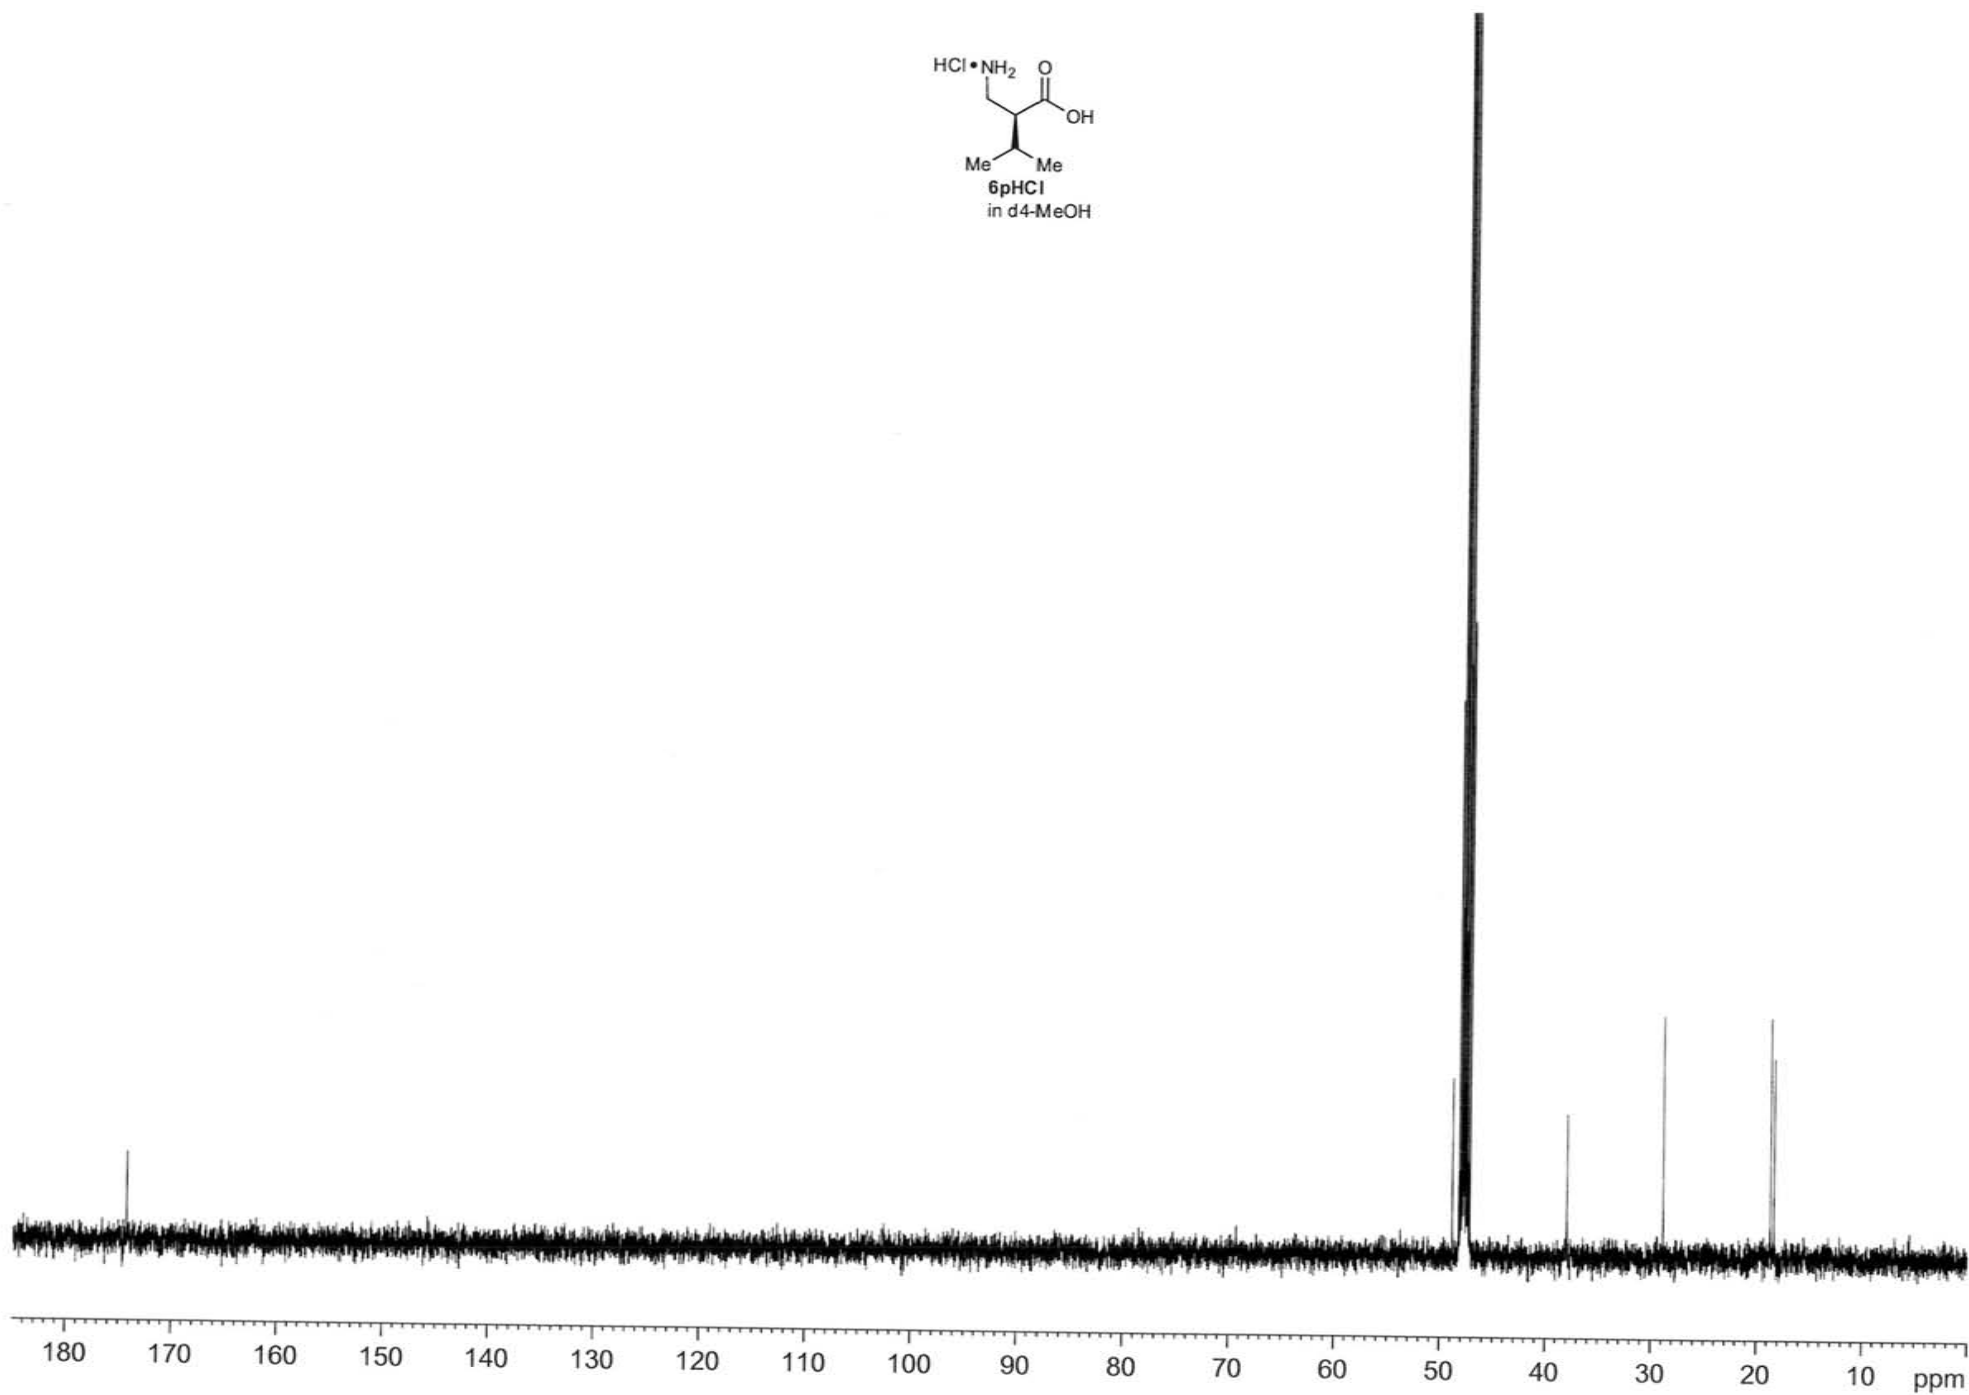

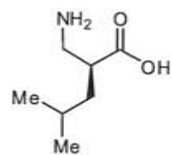

6r

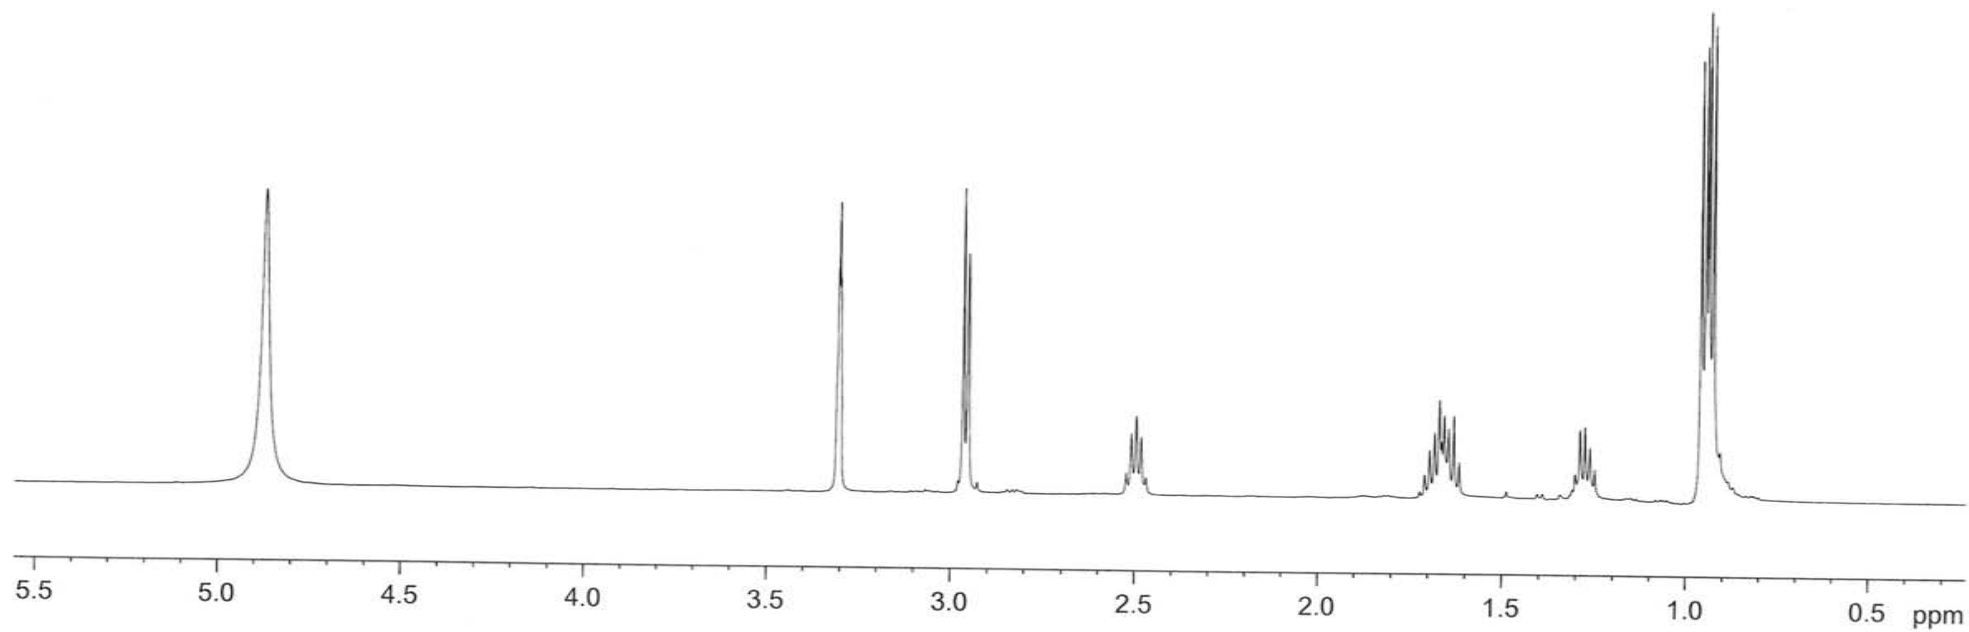

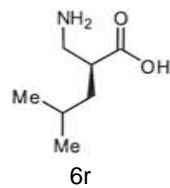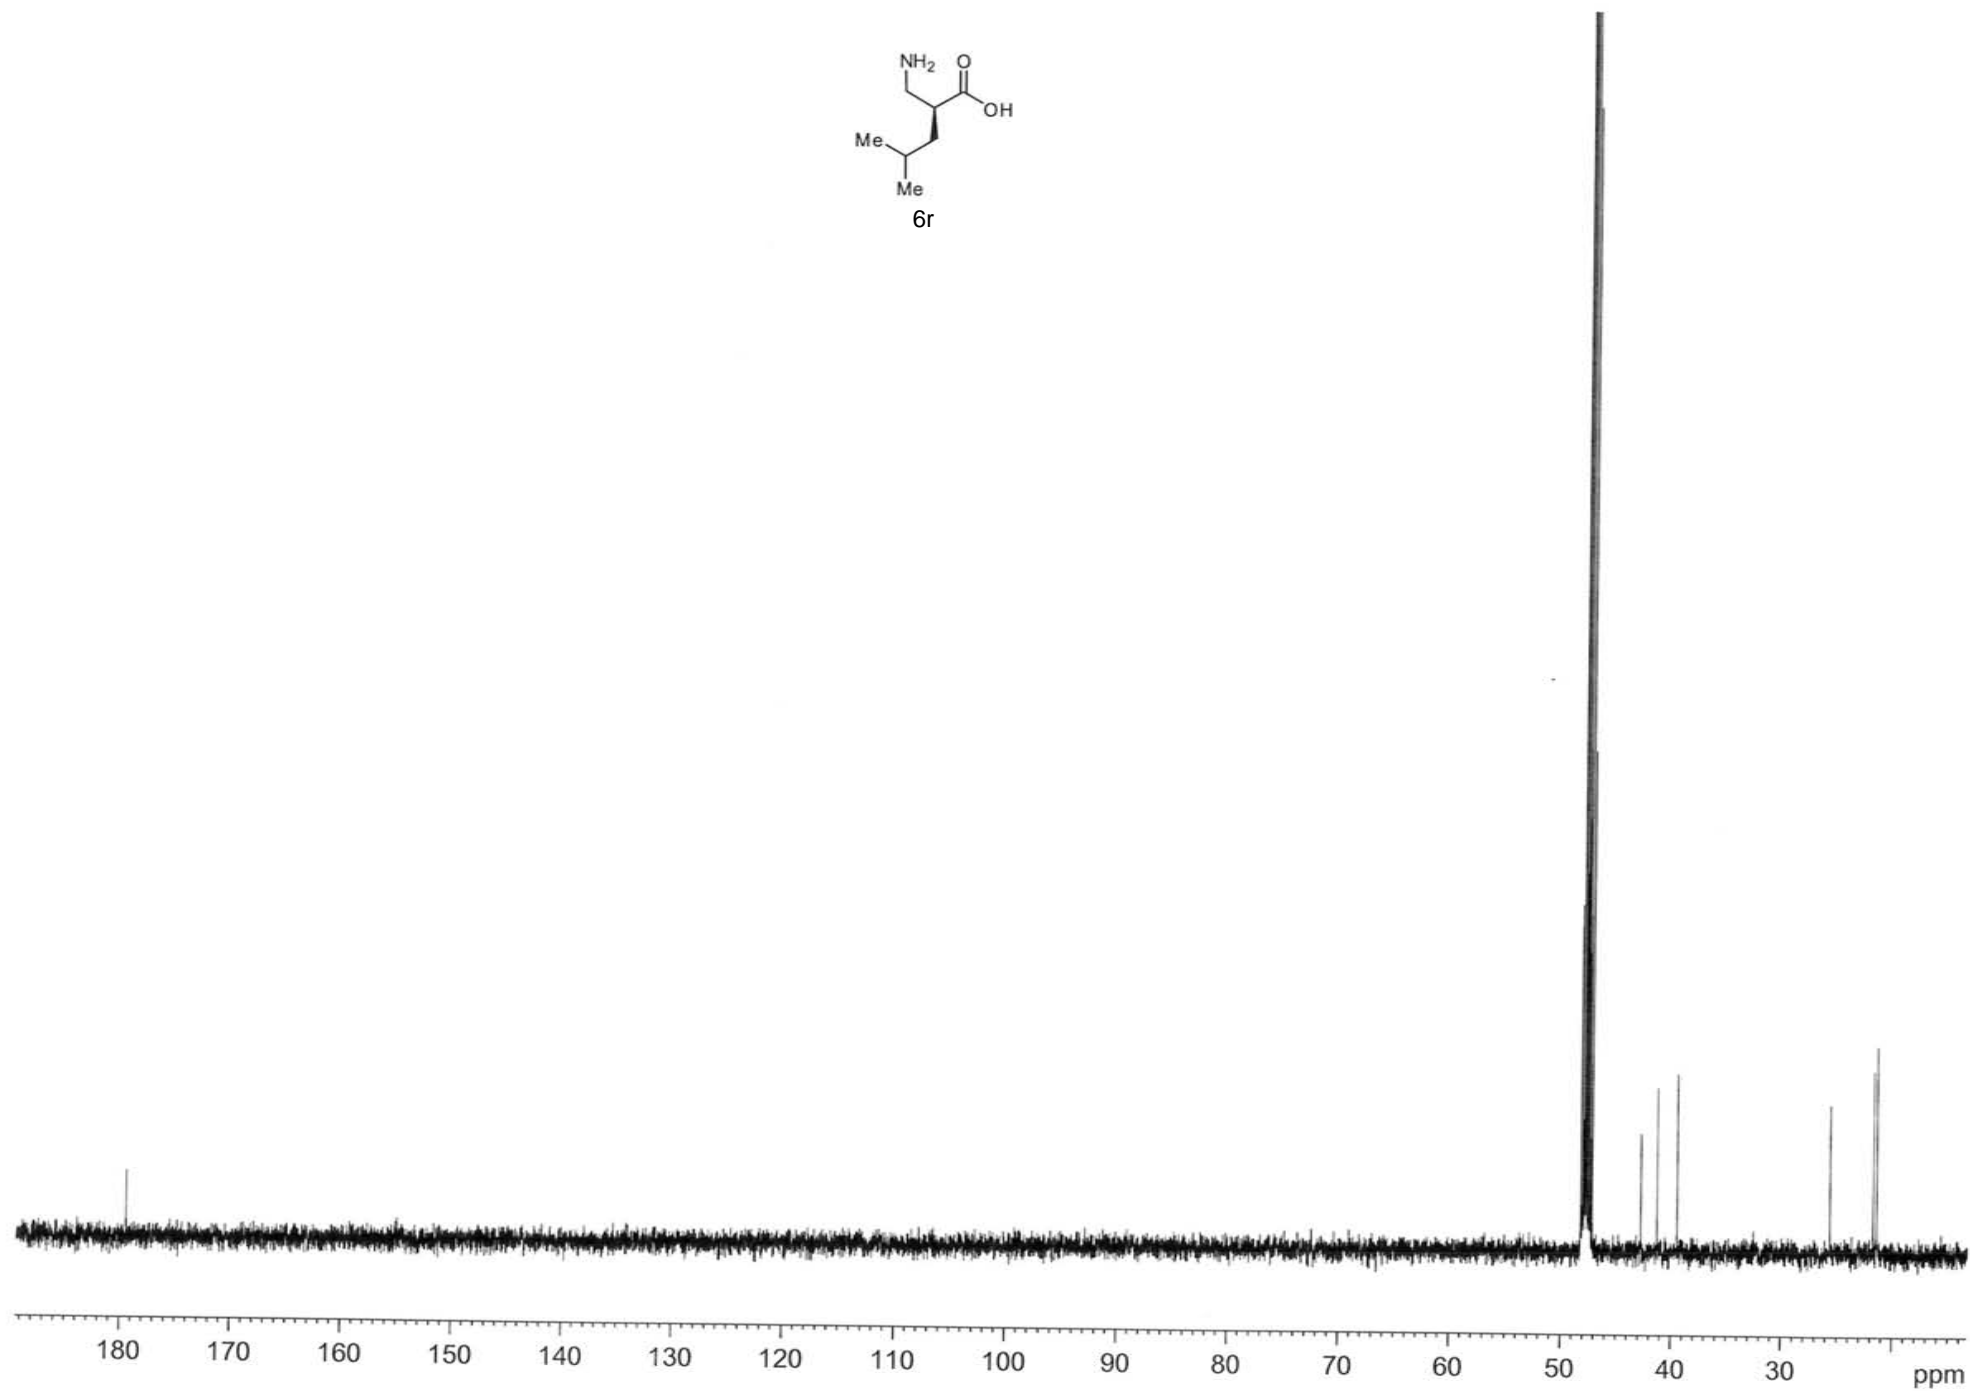

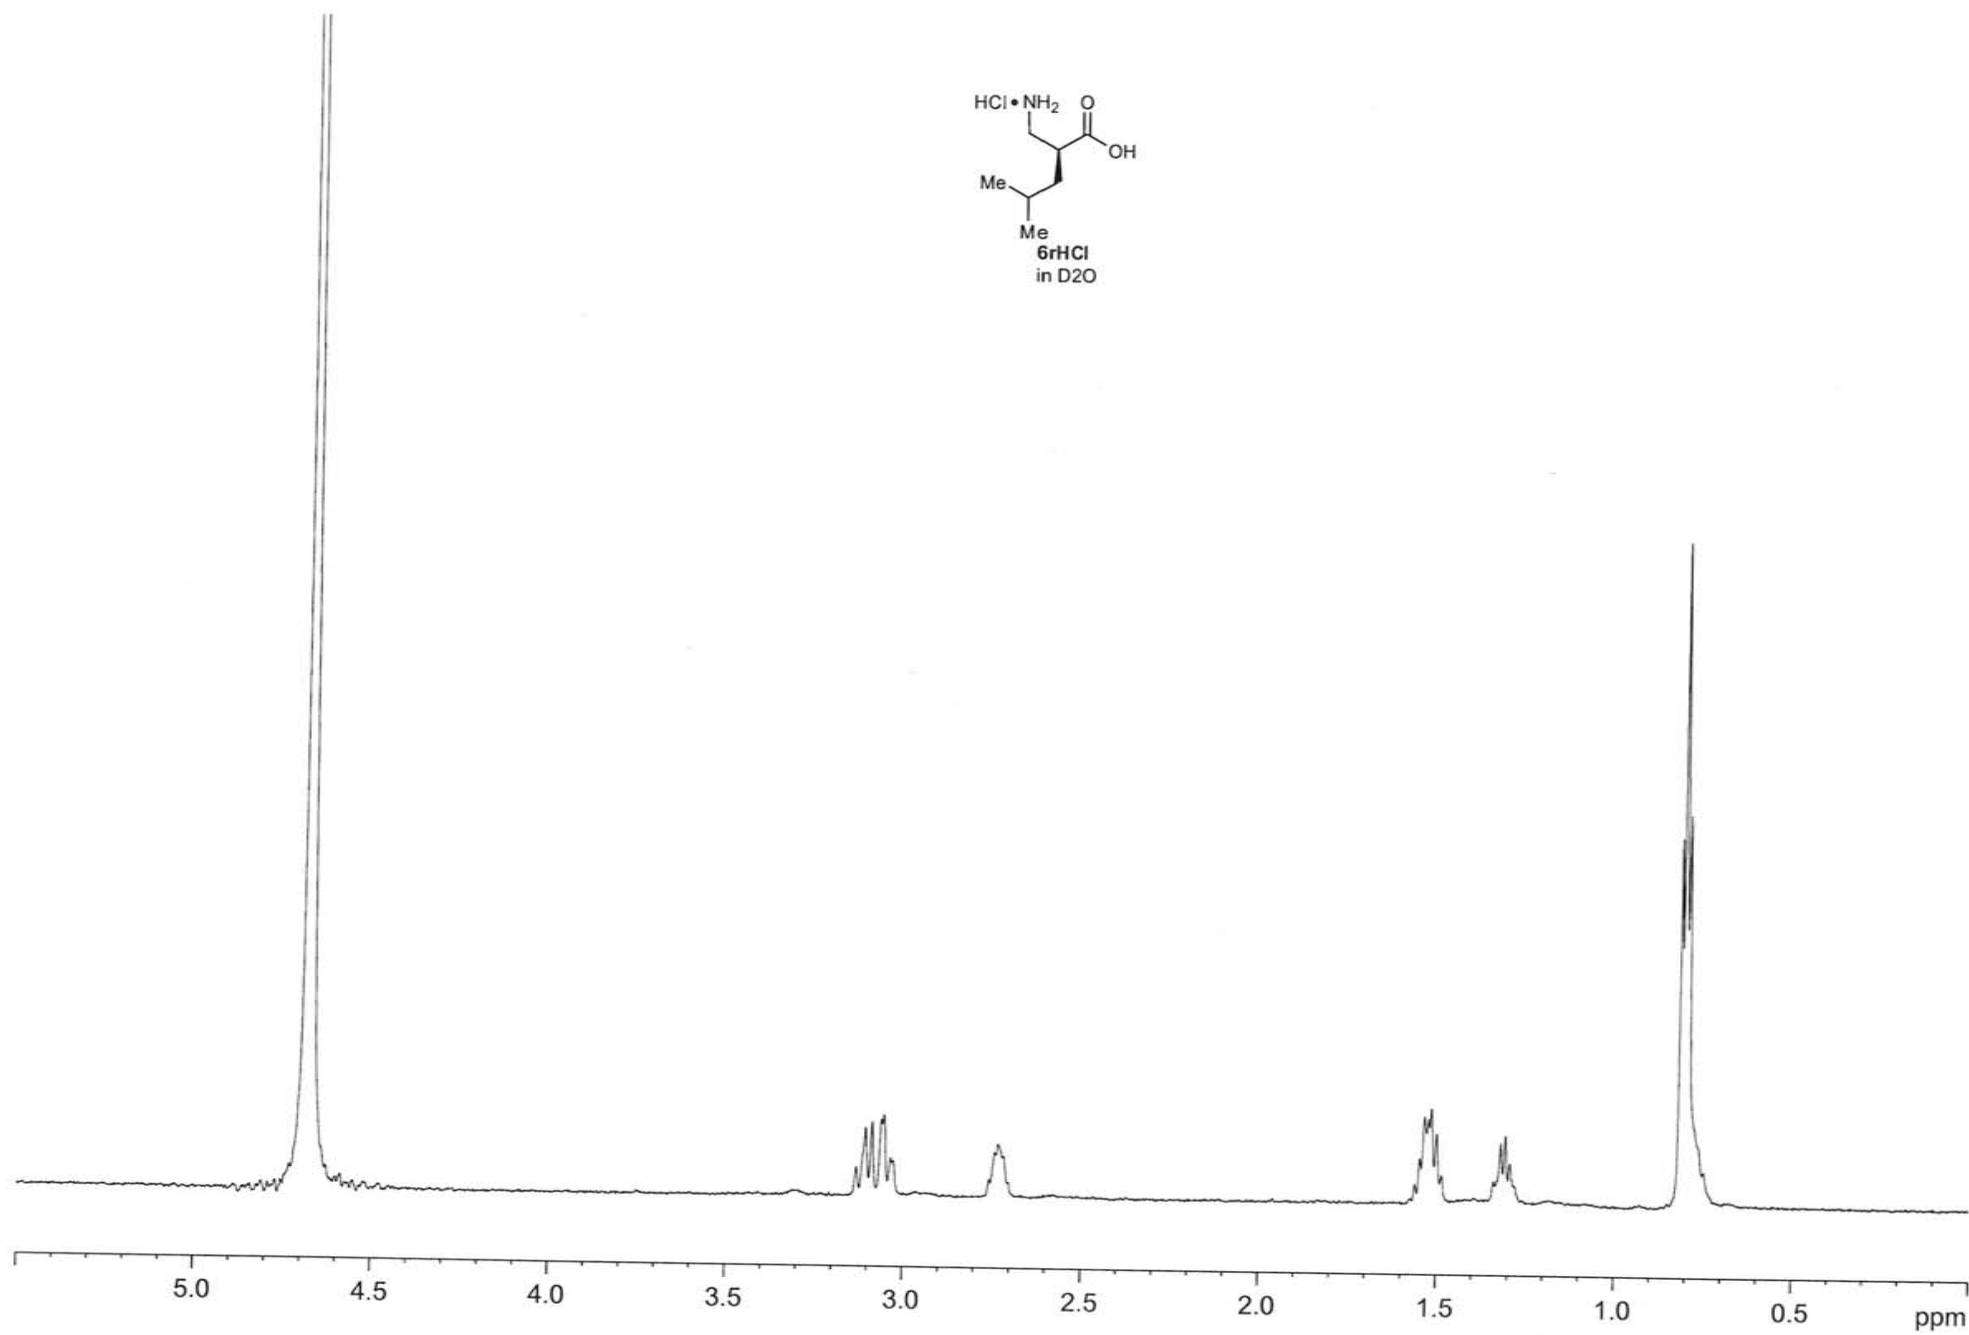

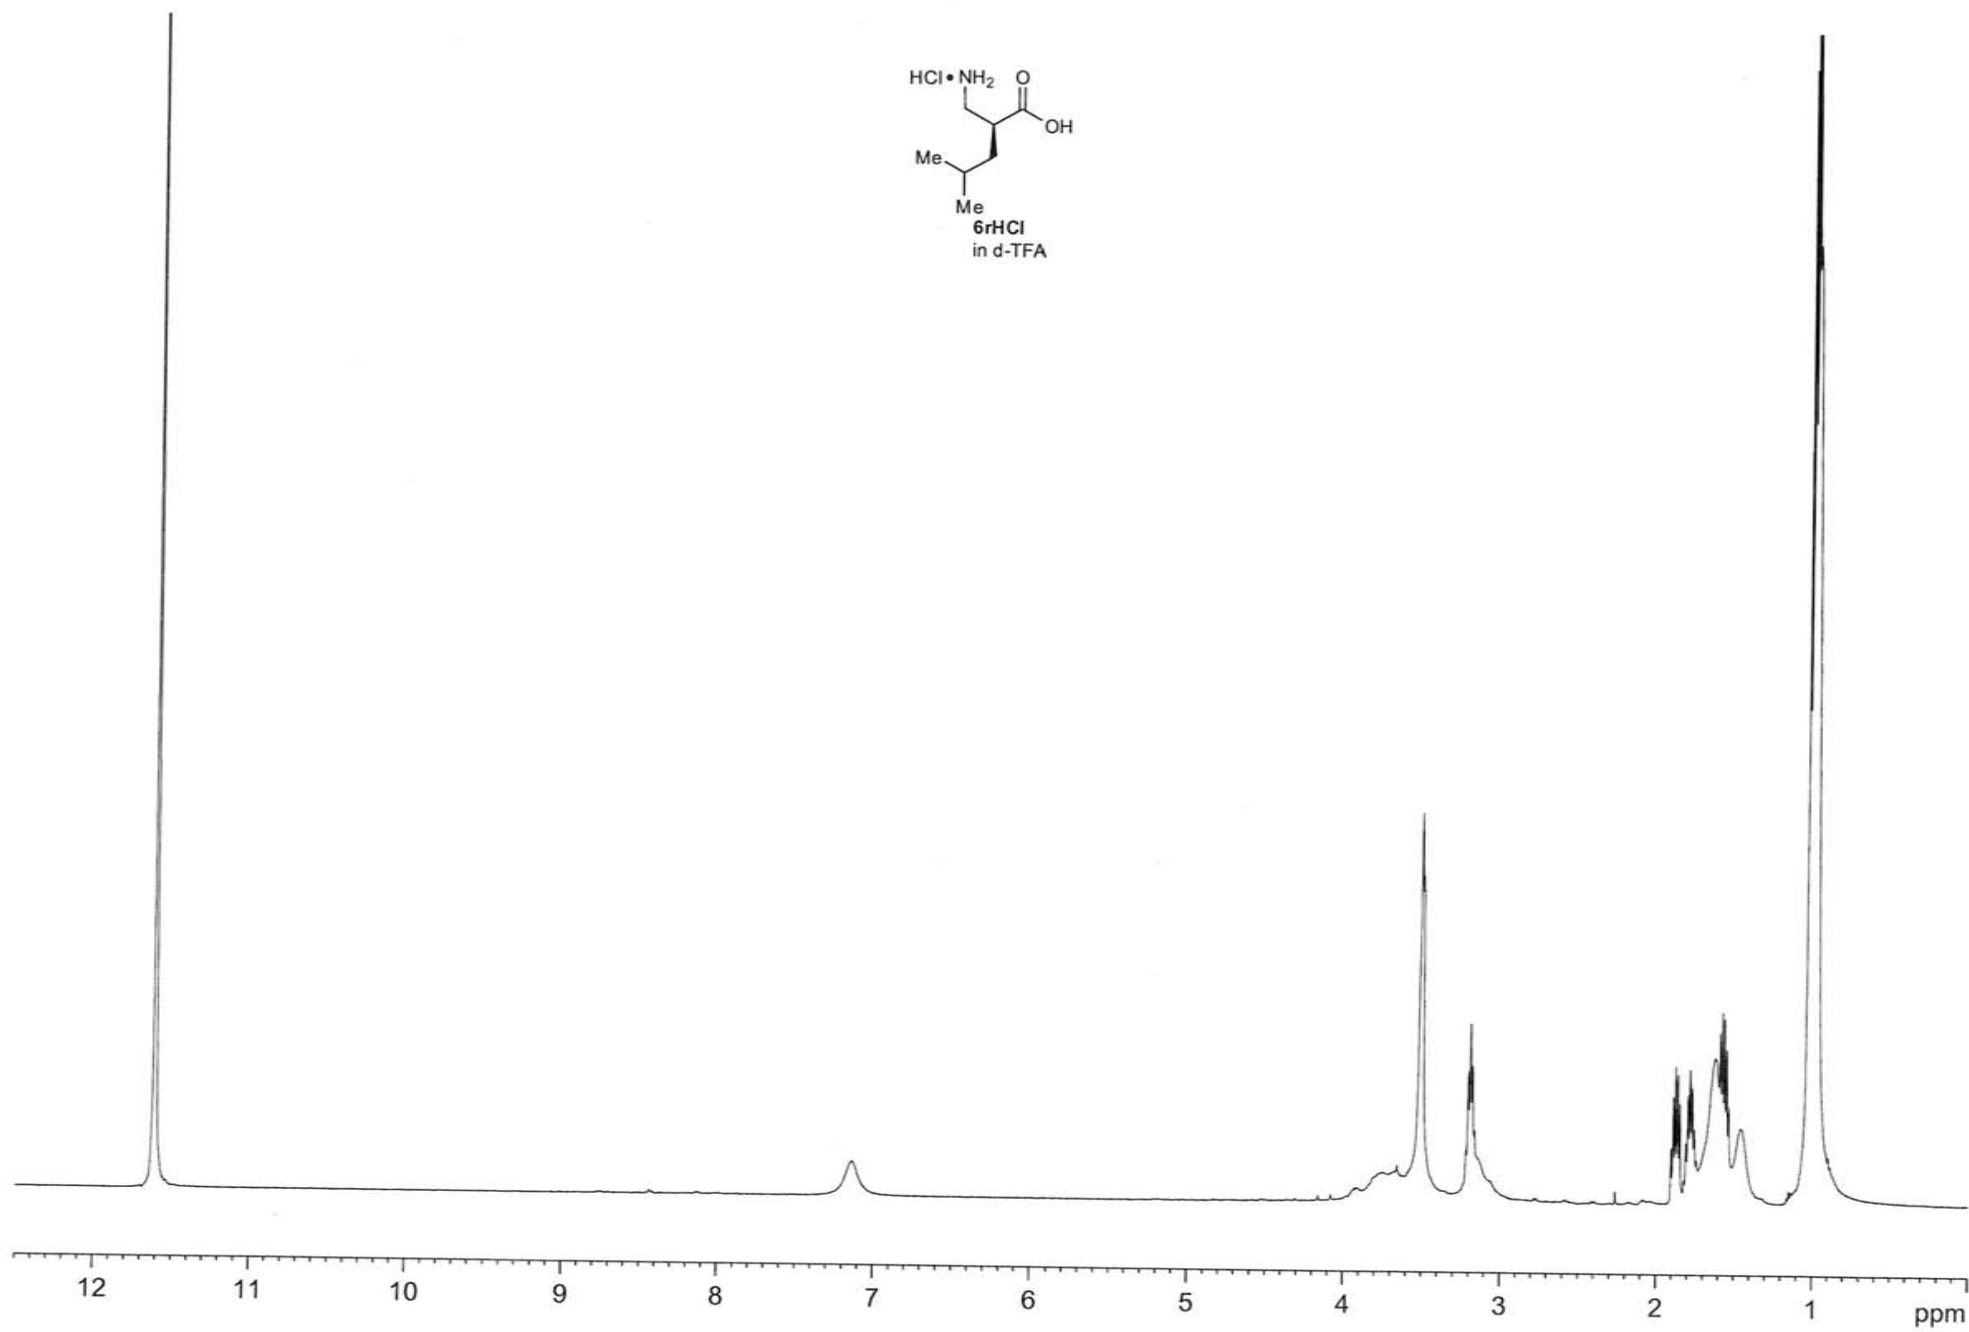

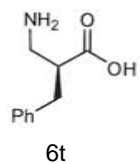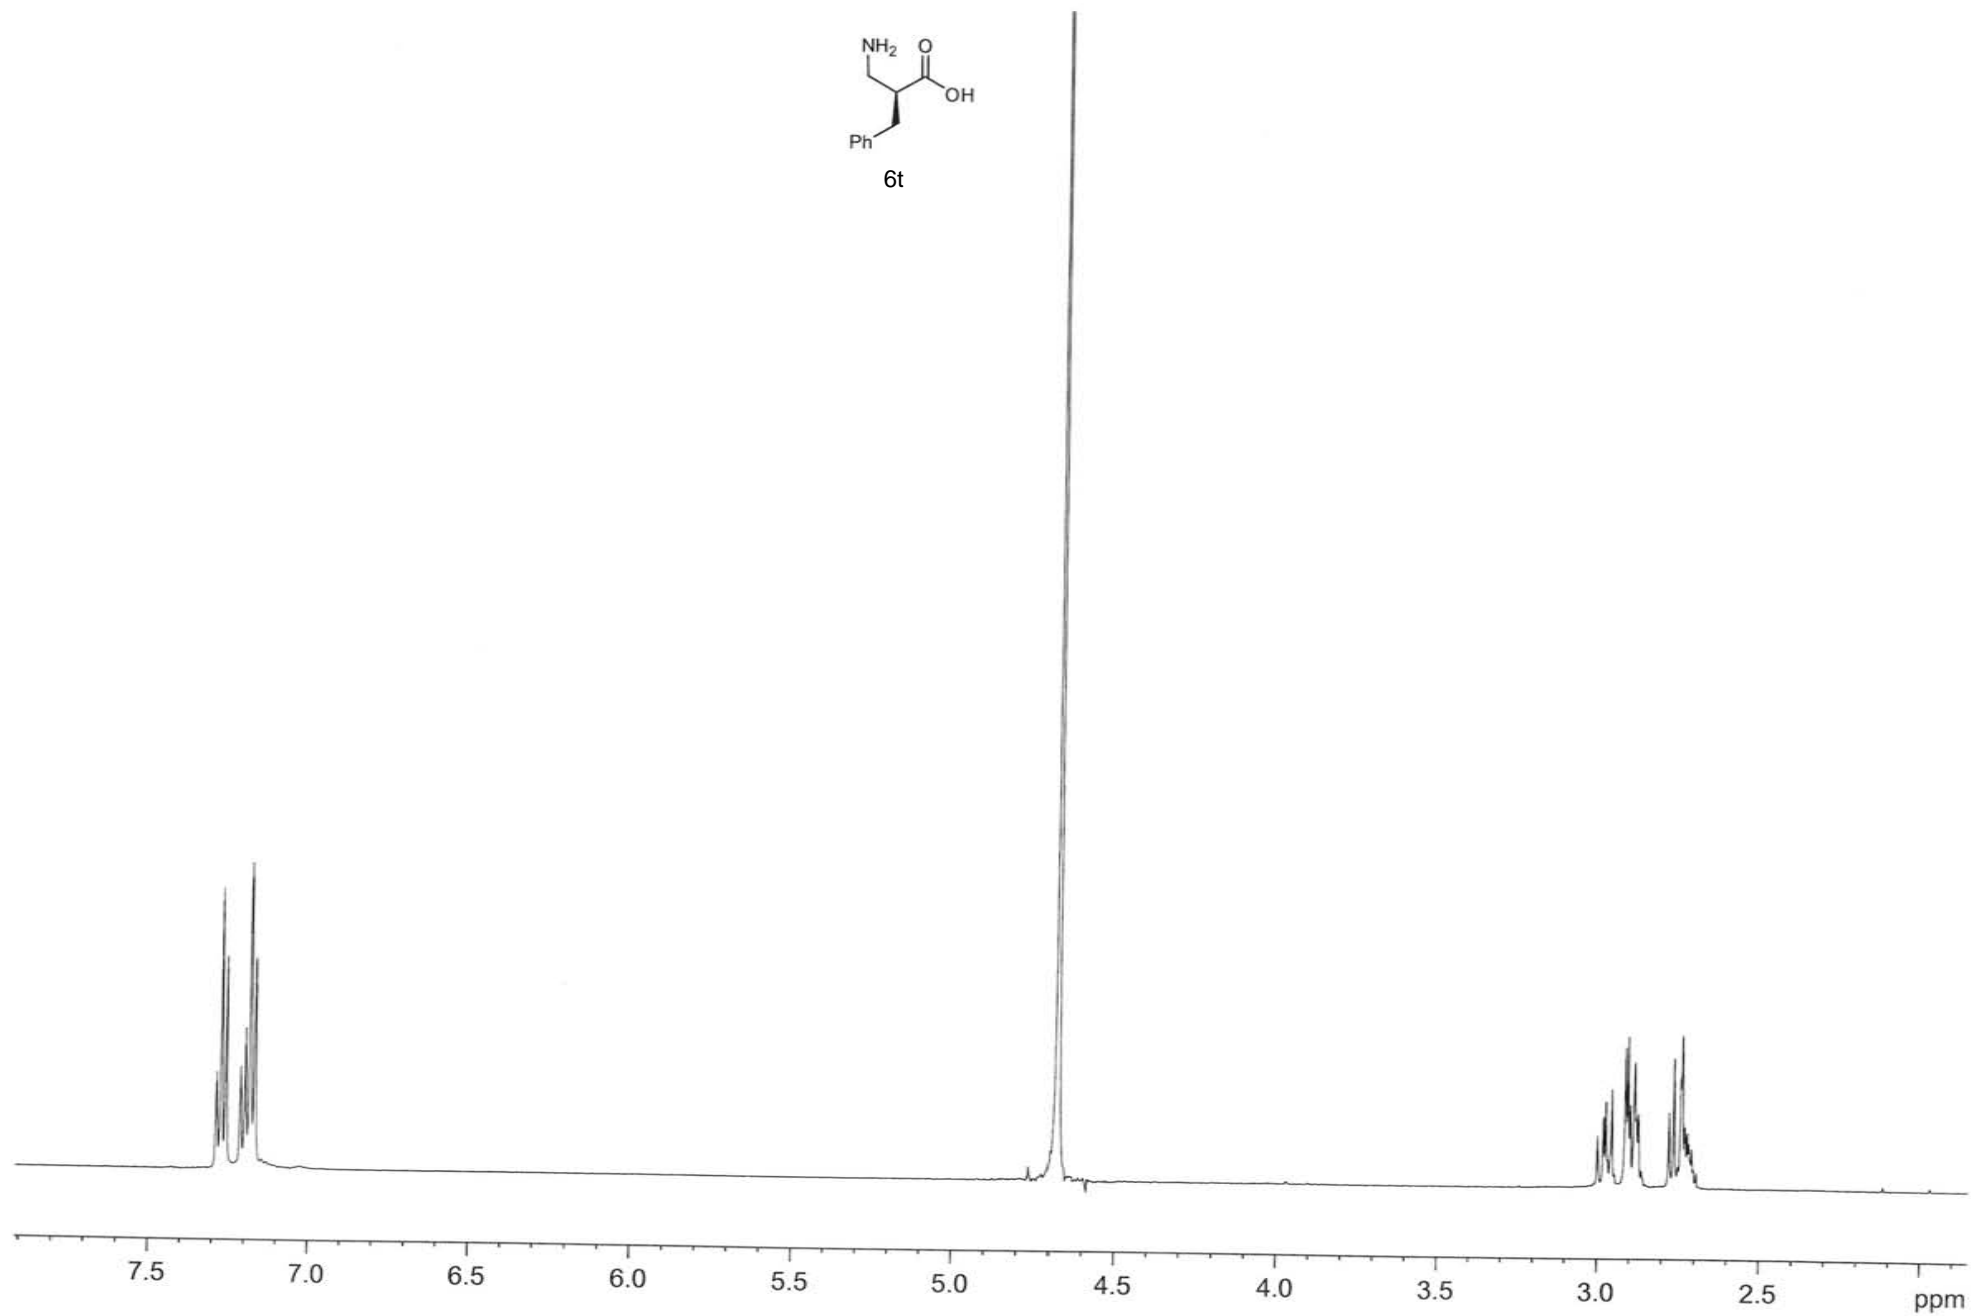

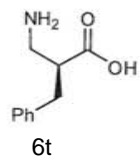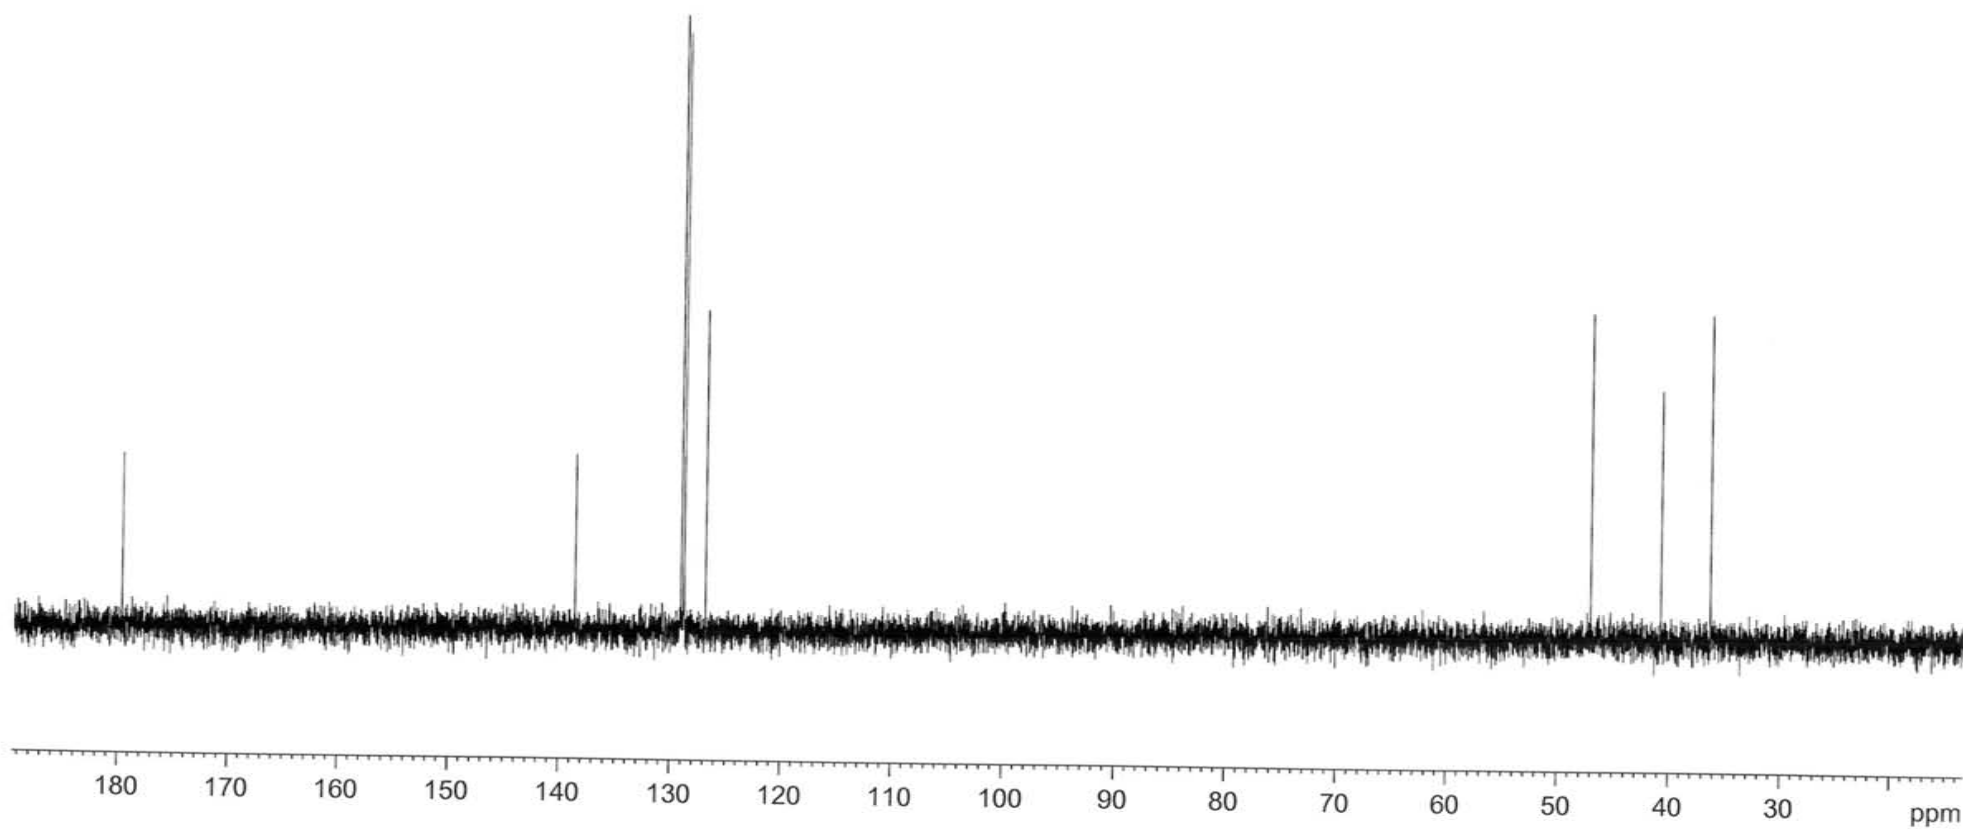



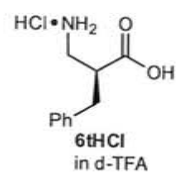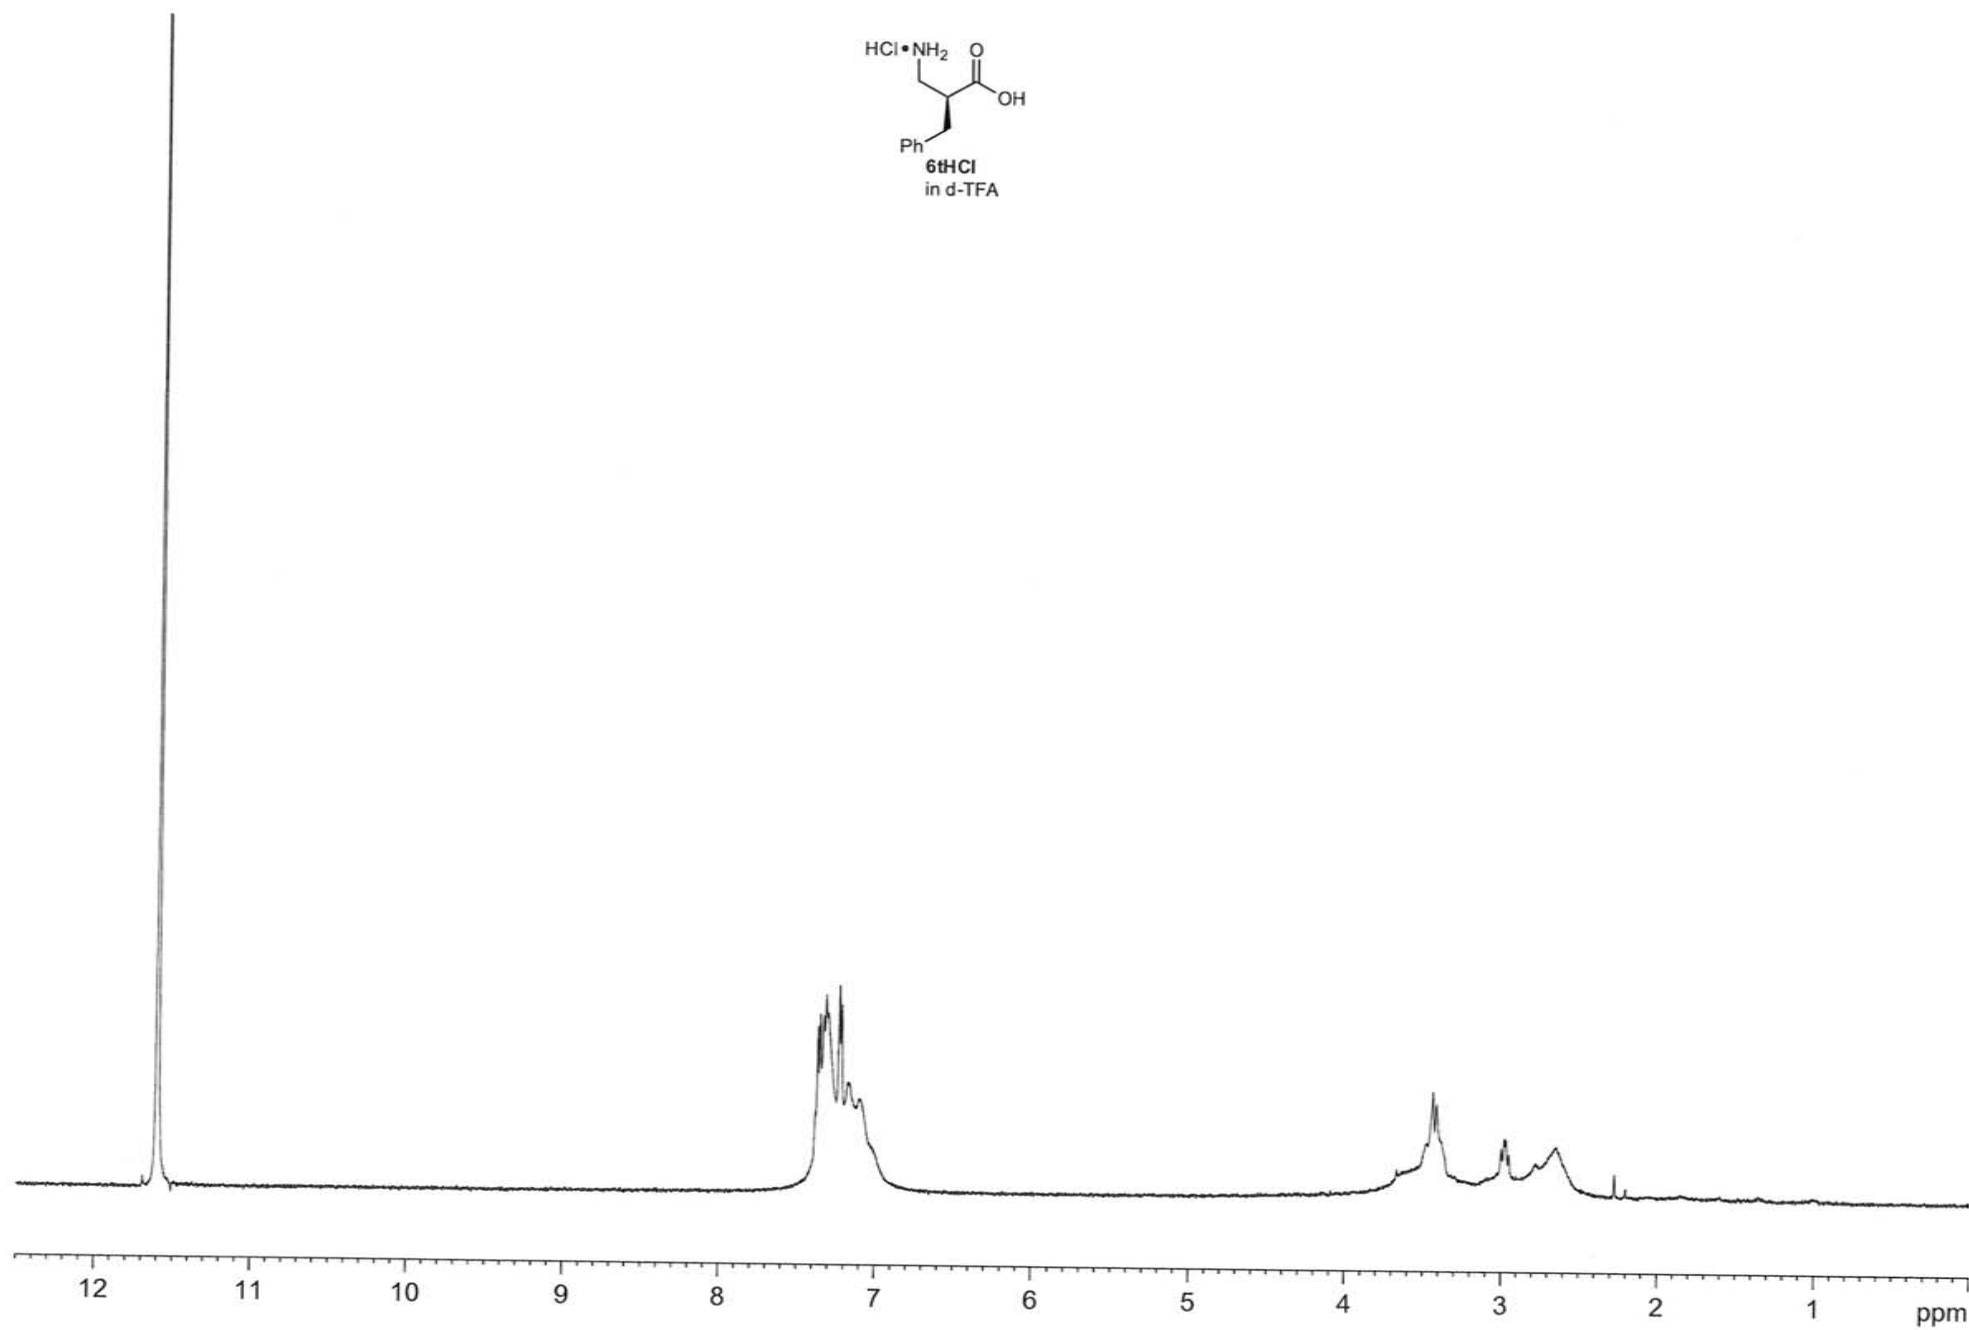

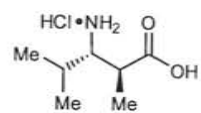

6vHCl

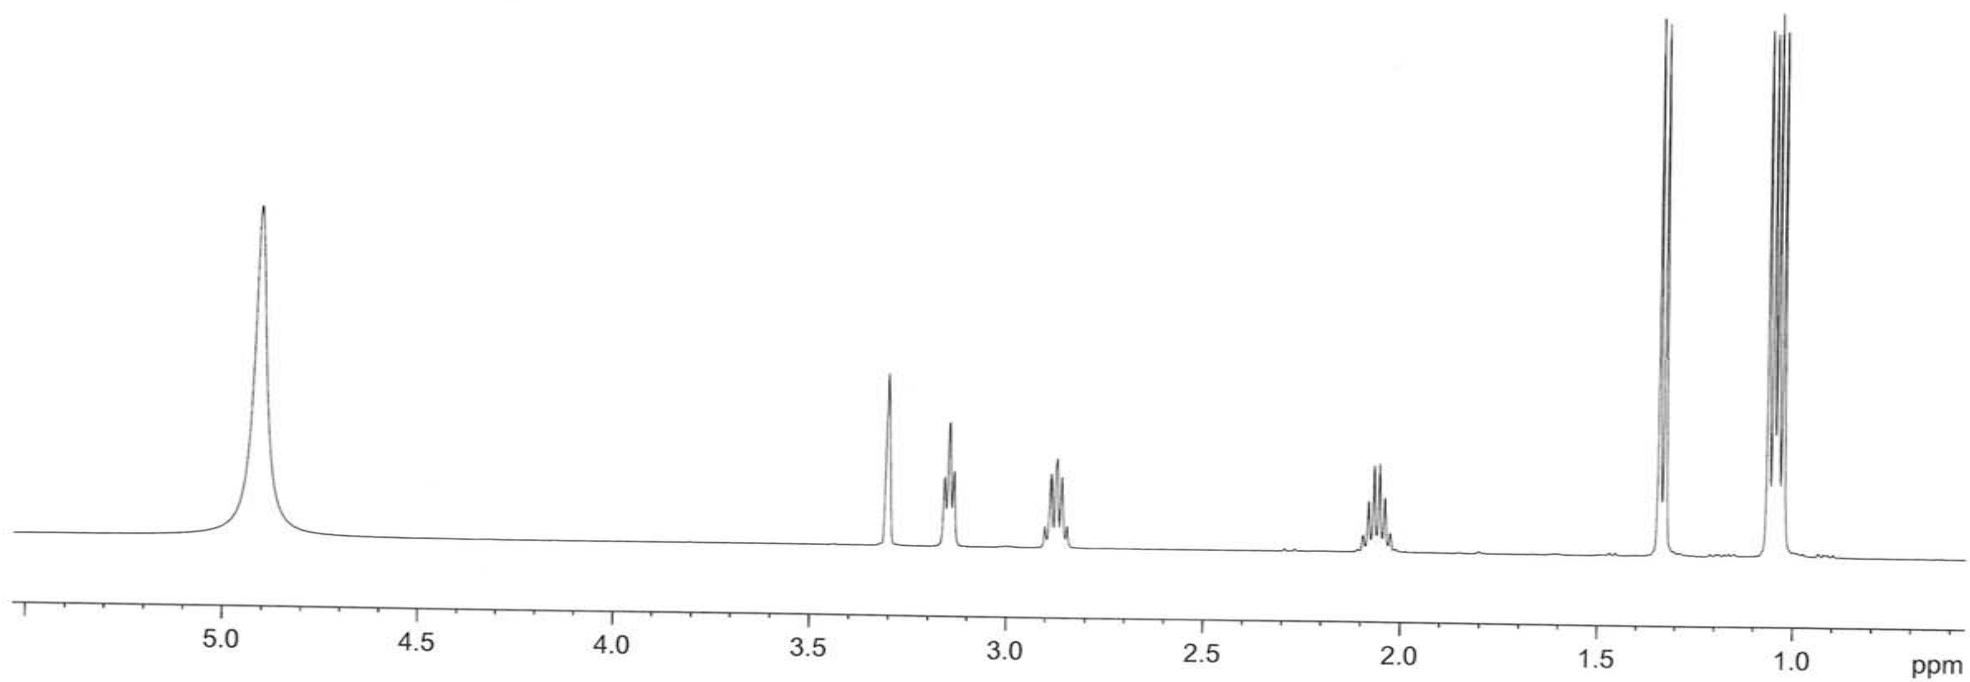

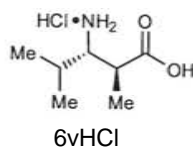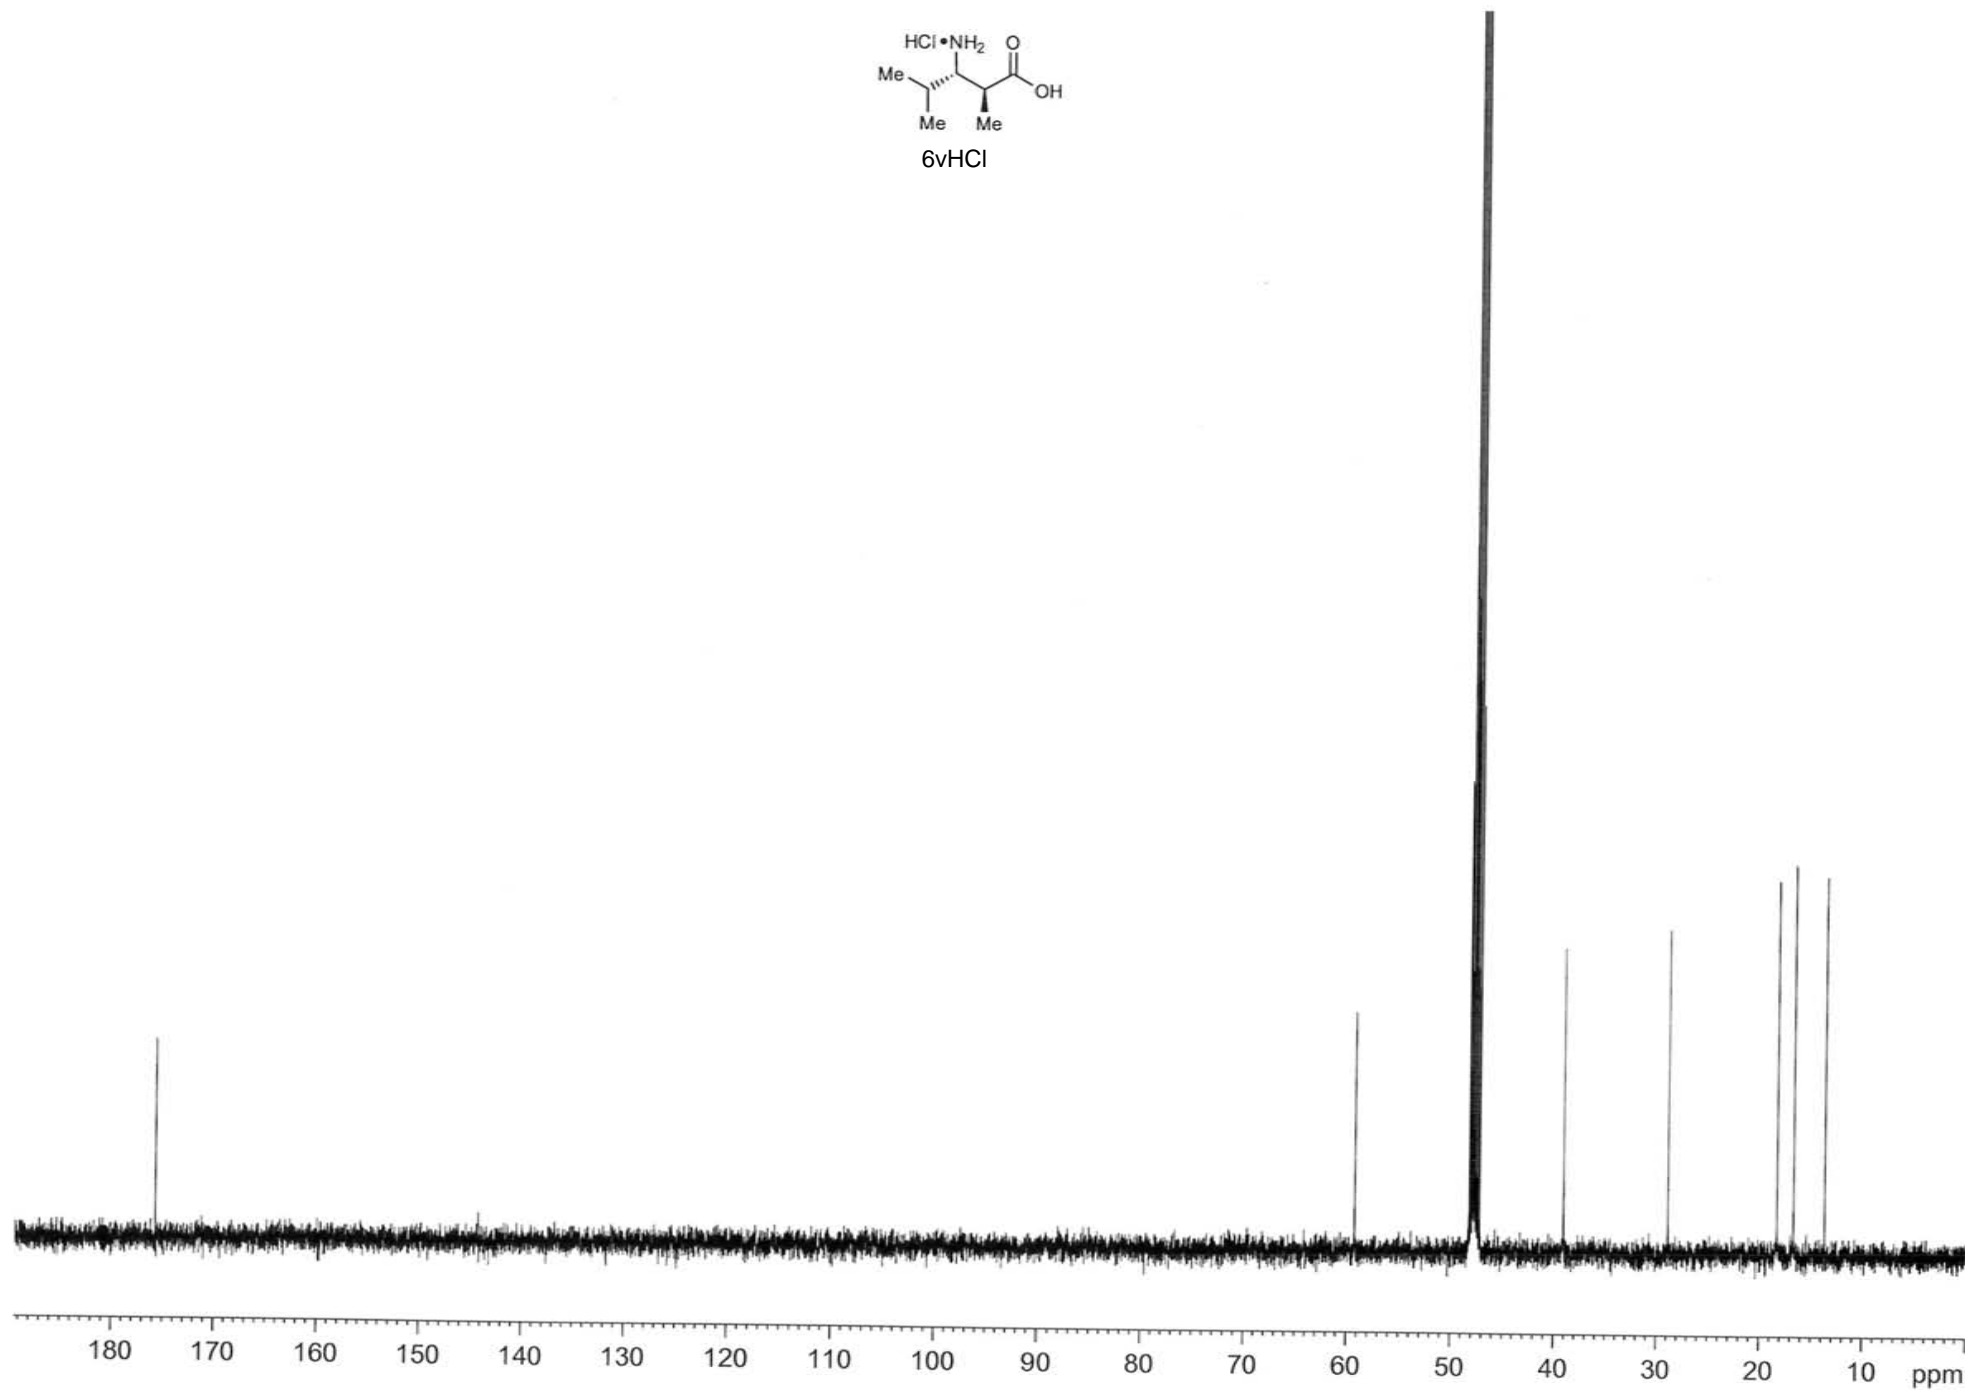

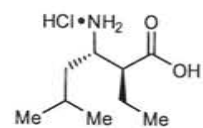

6wHCl

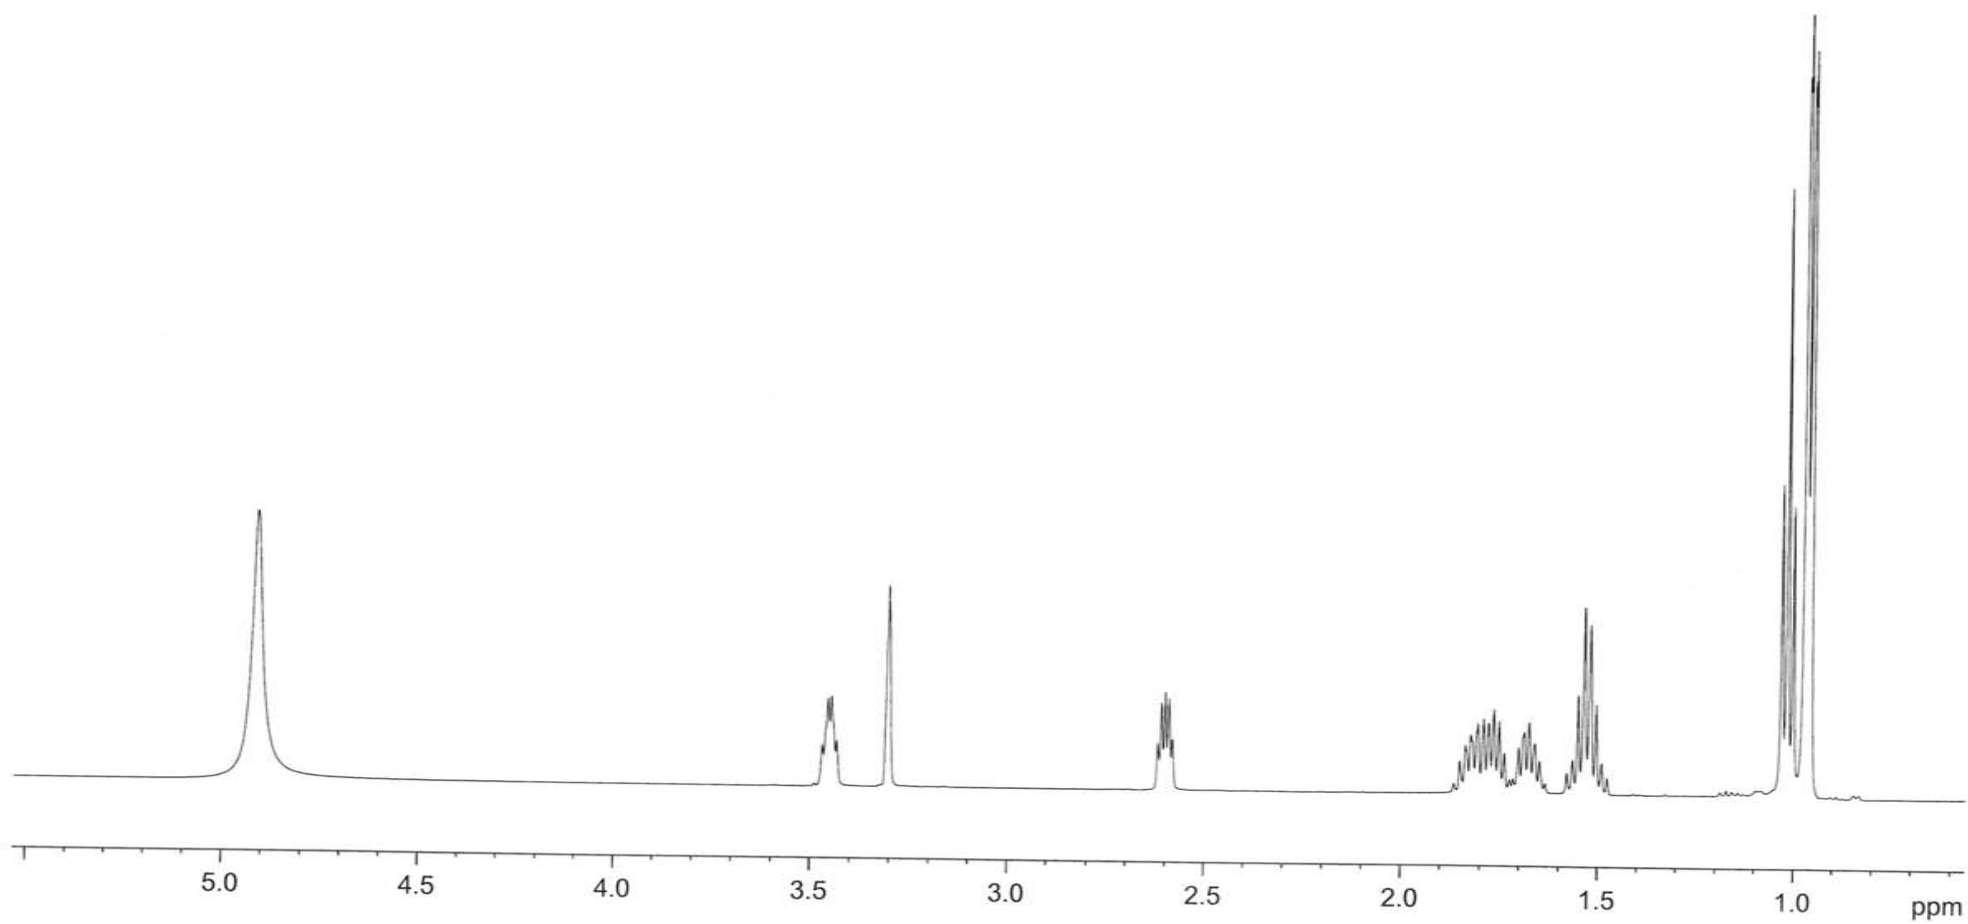

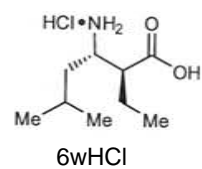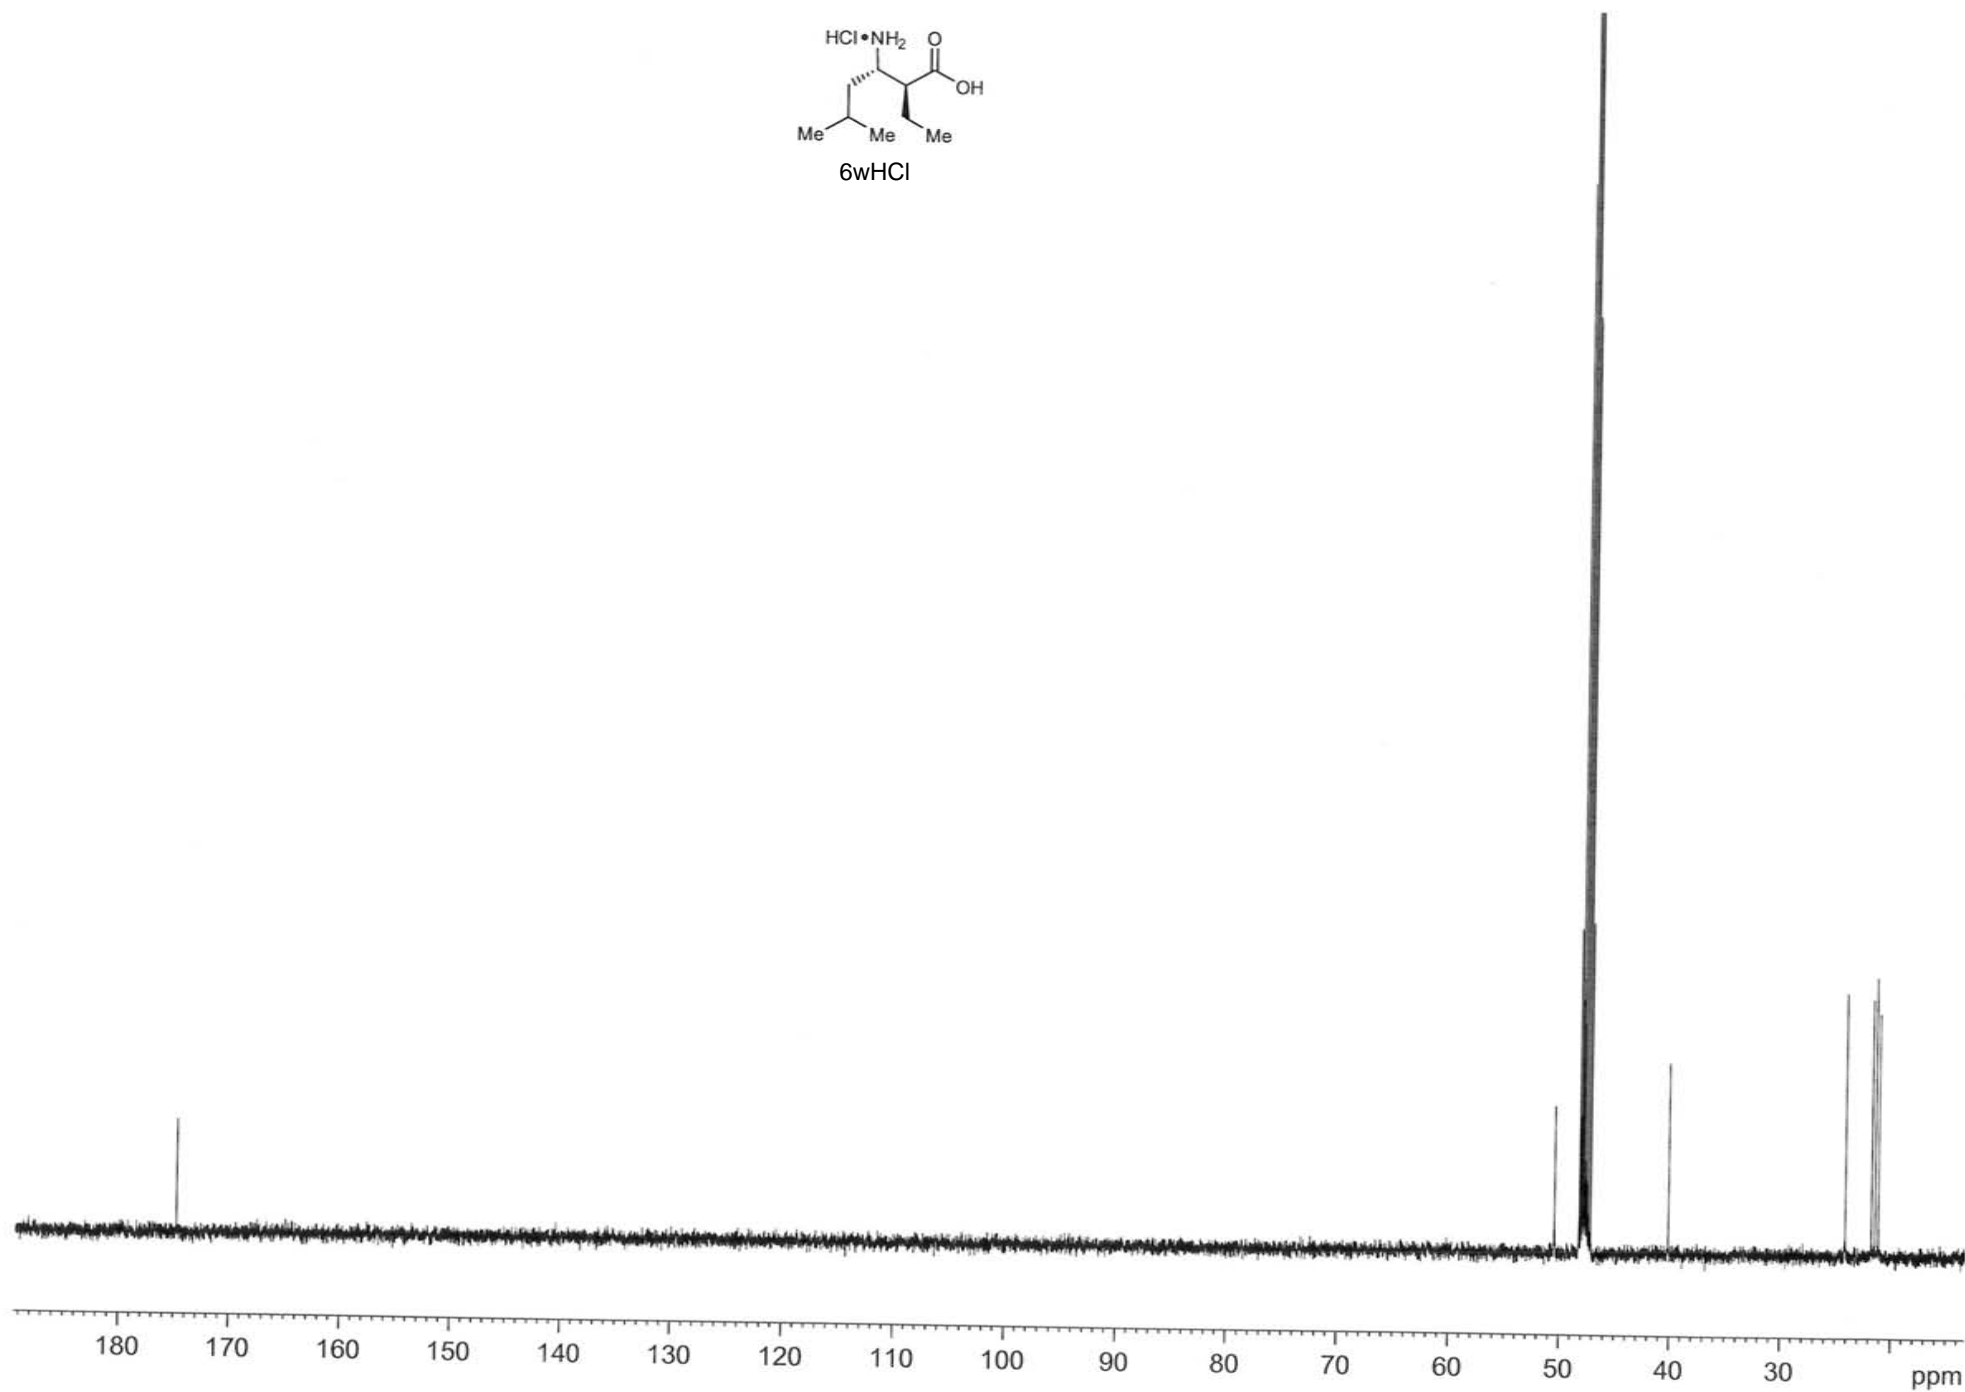

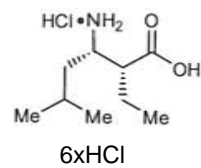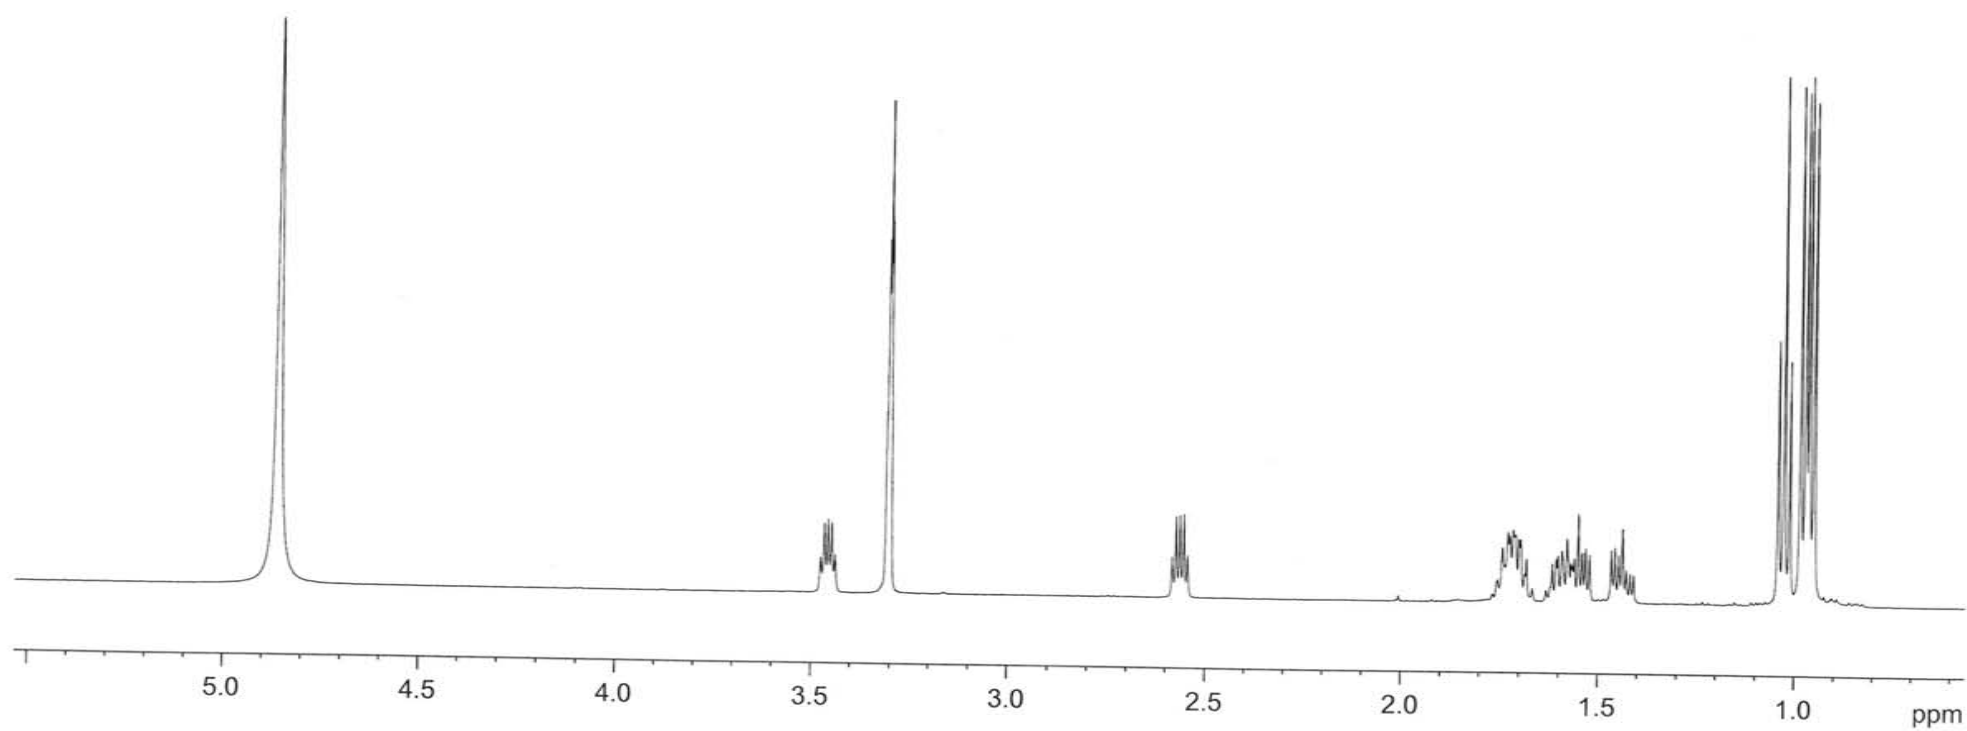

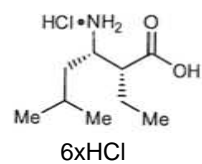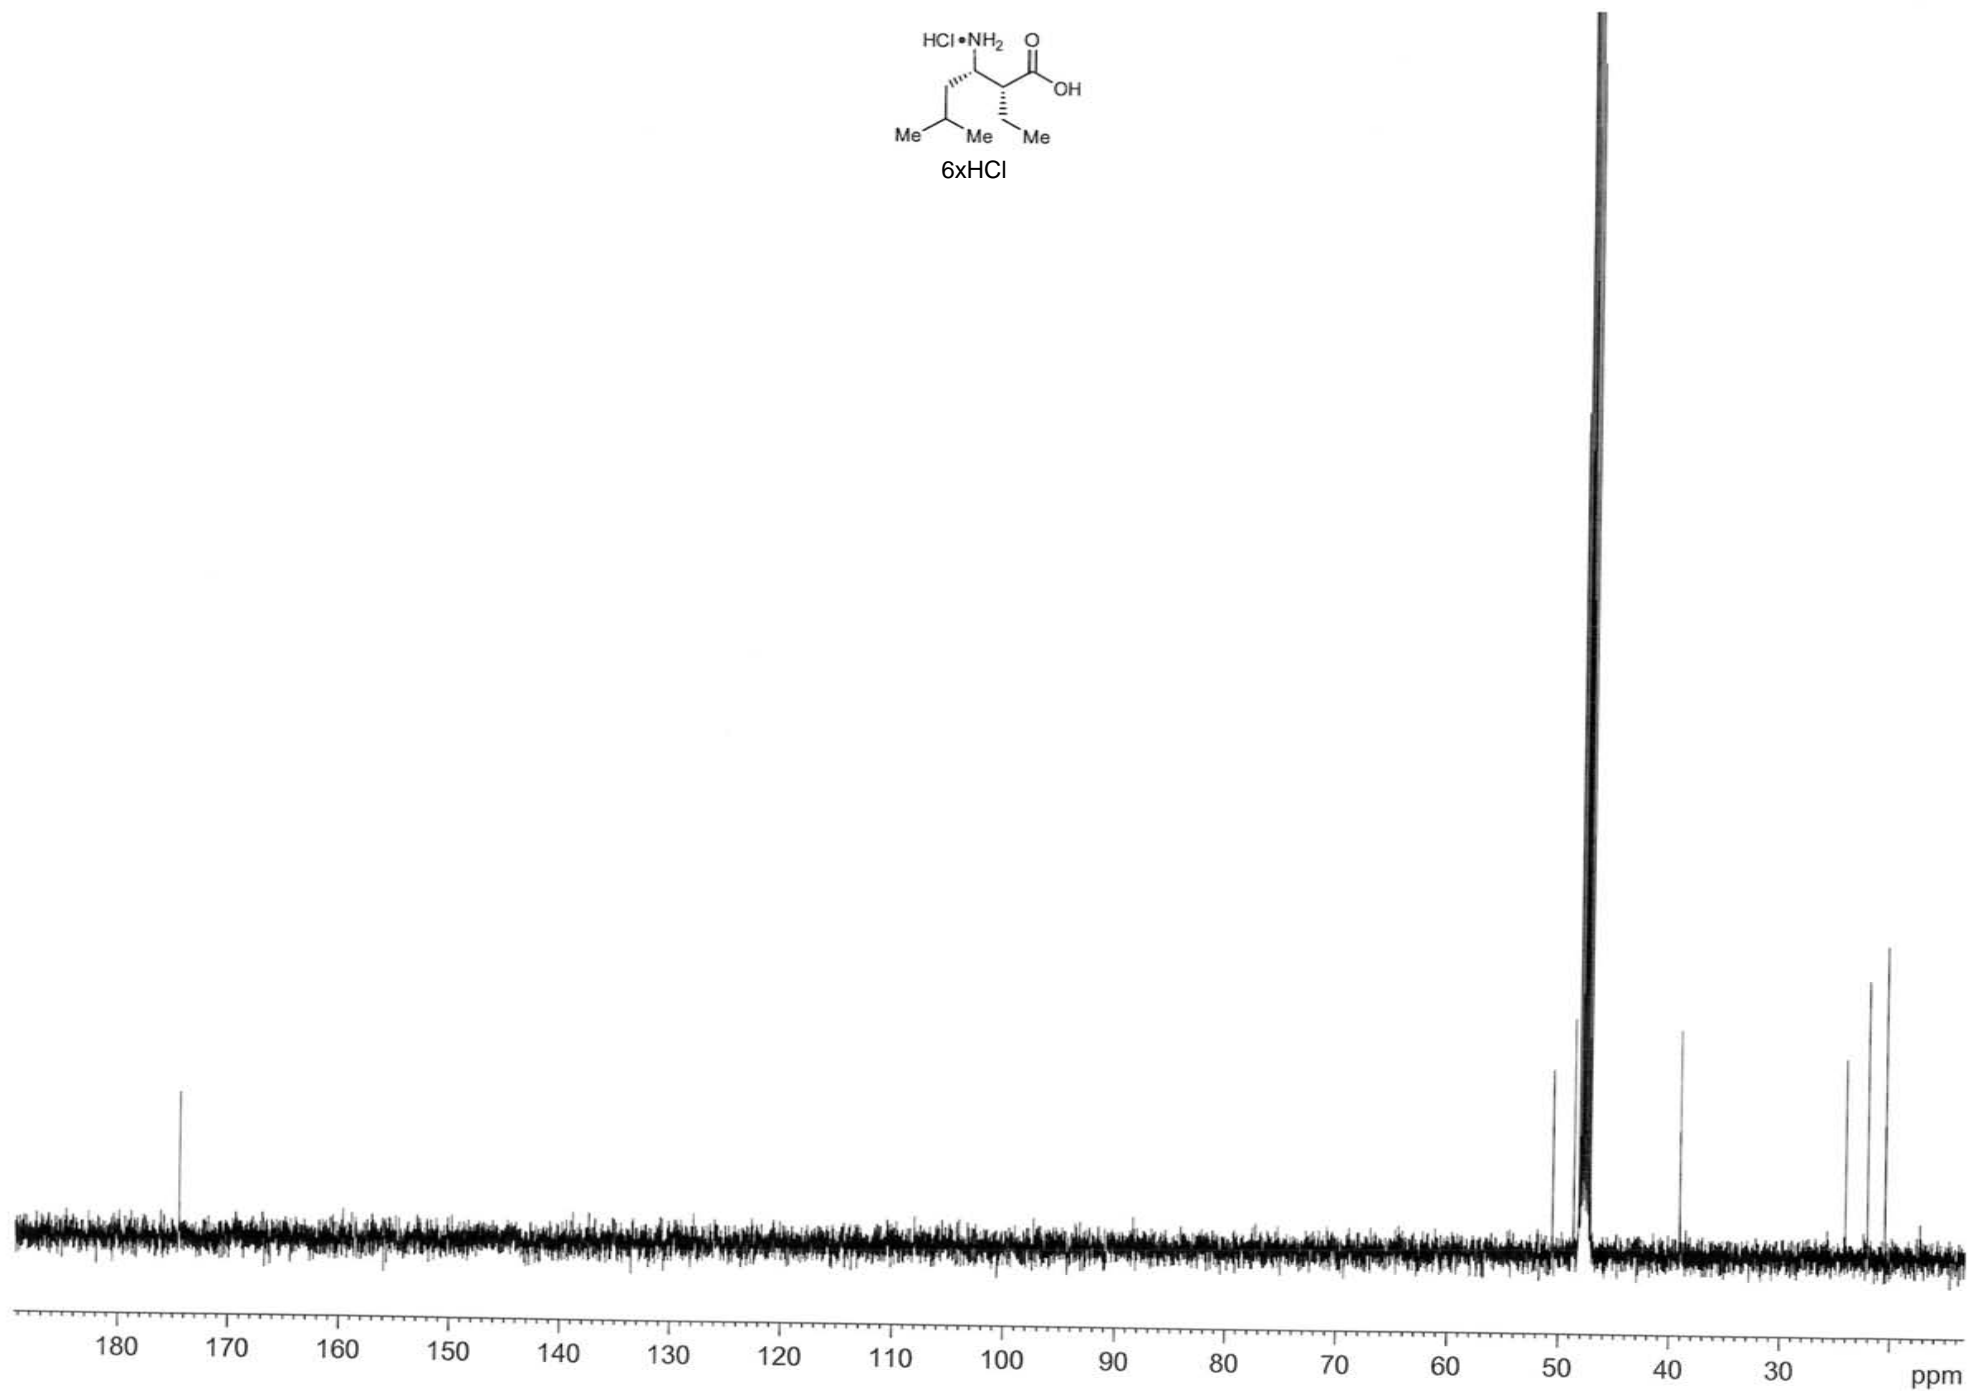

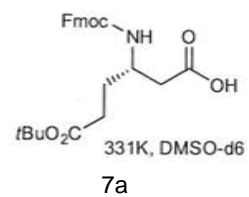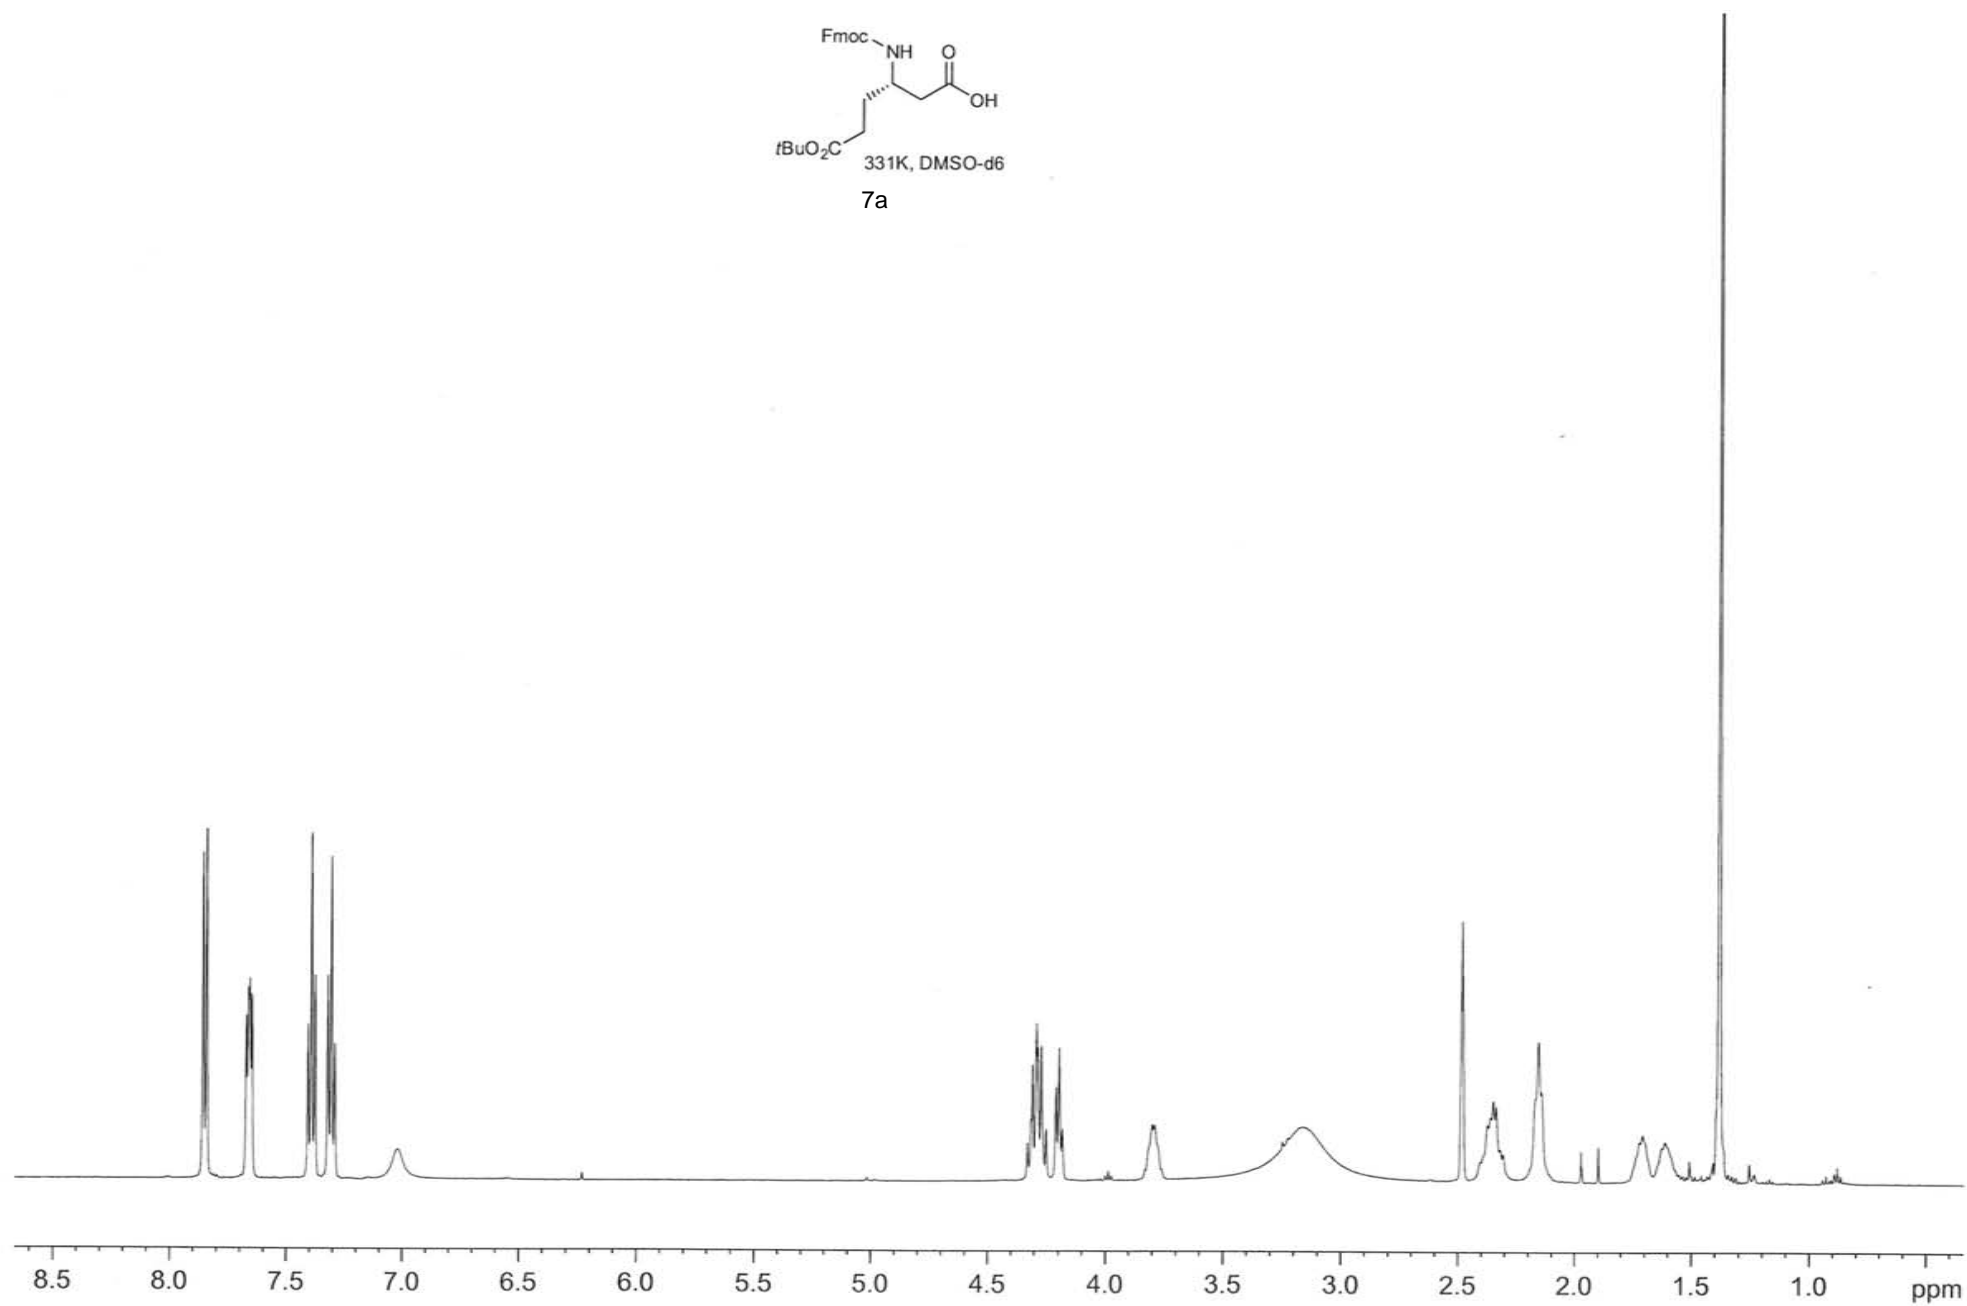



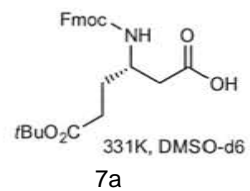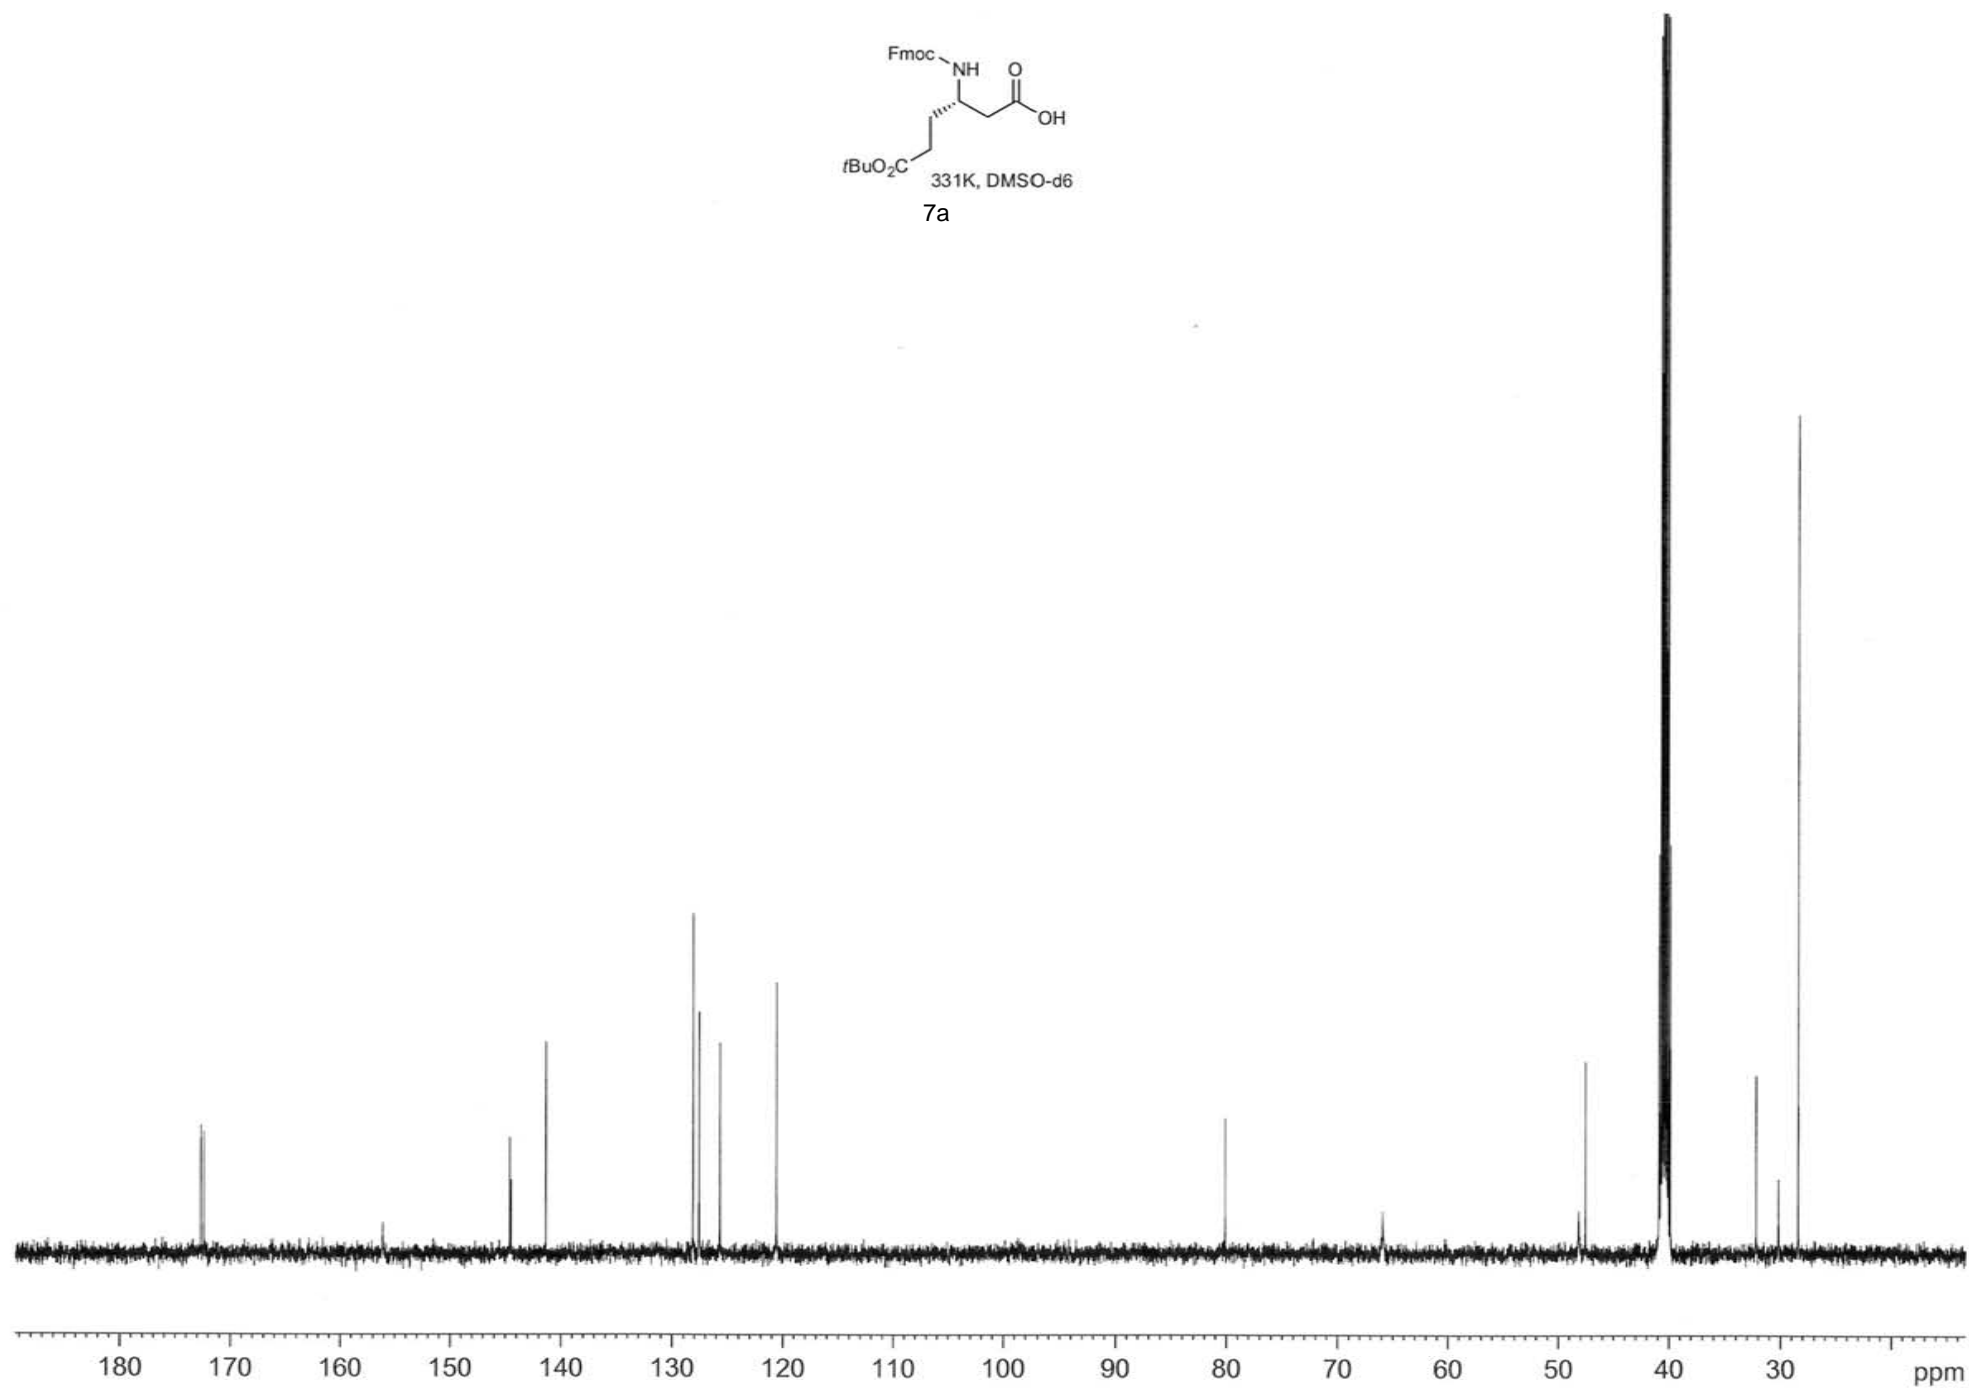

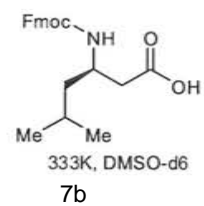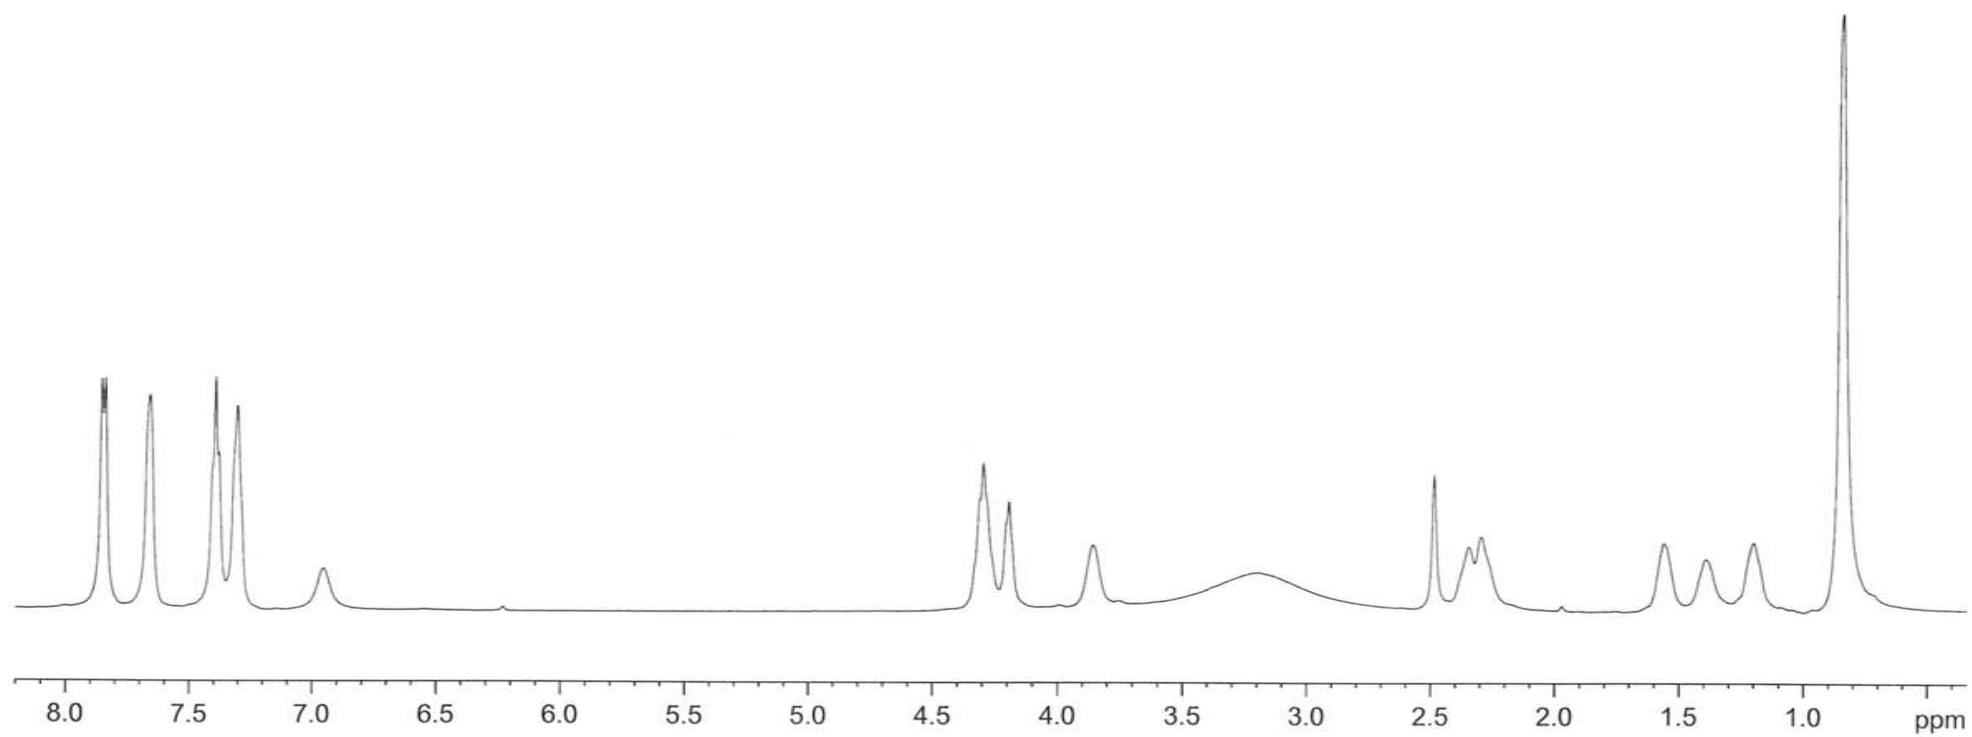

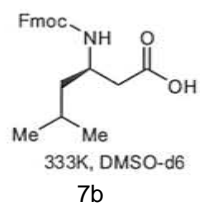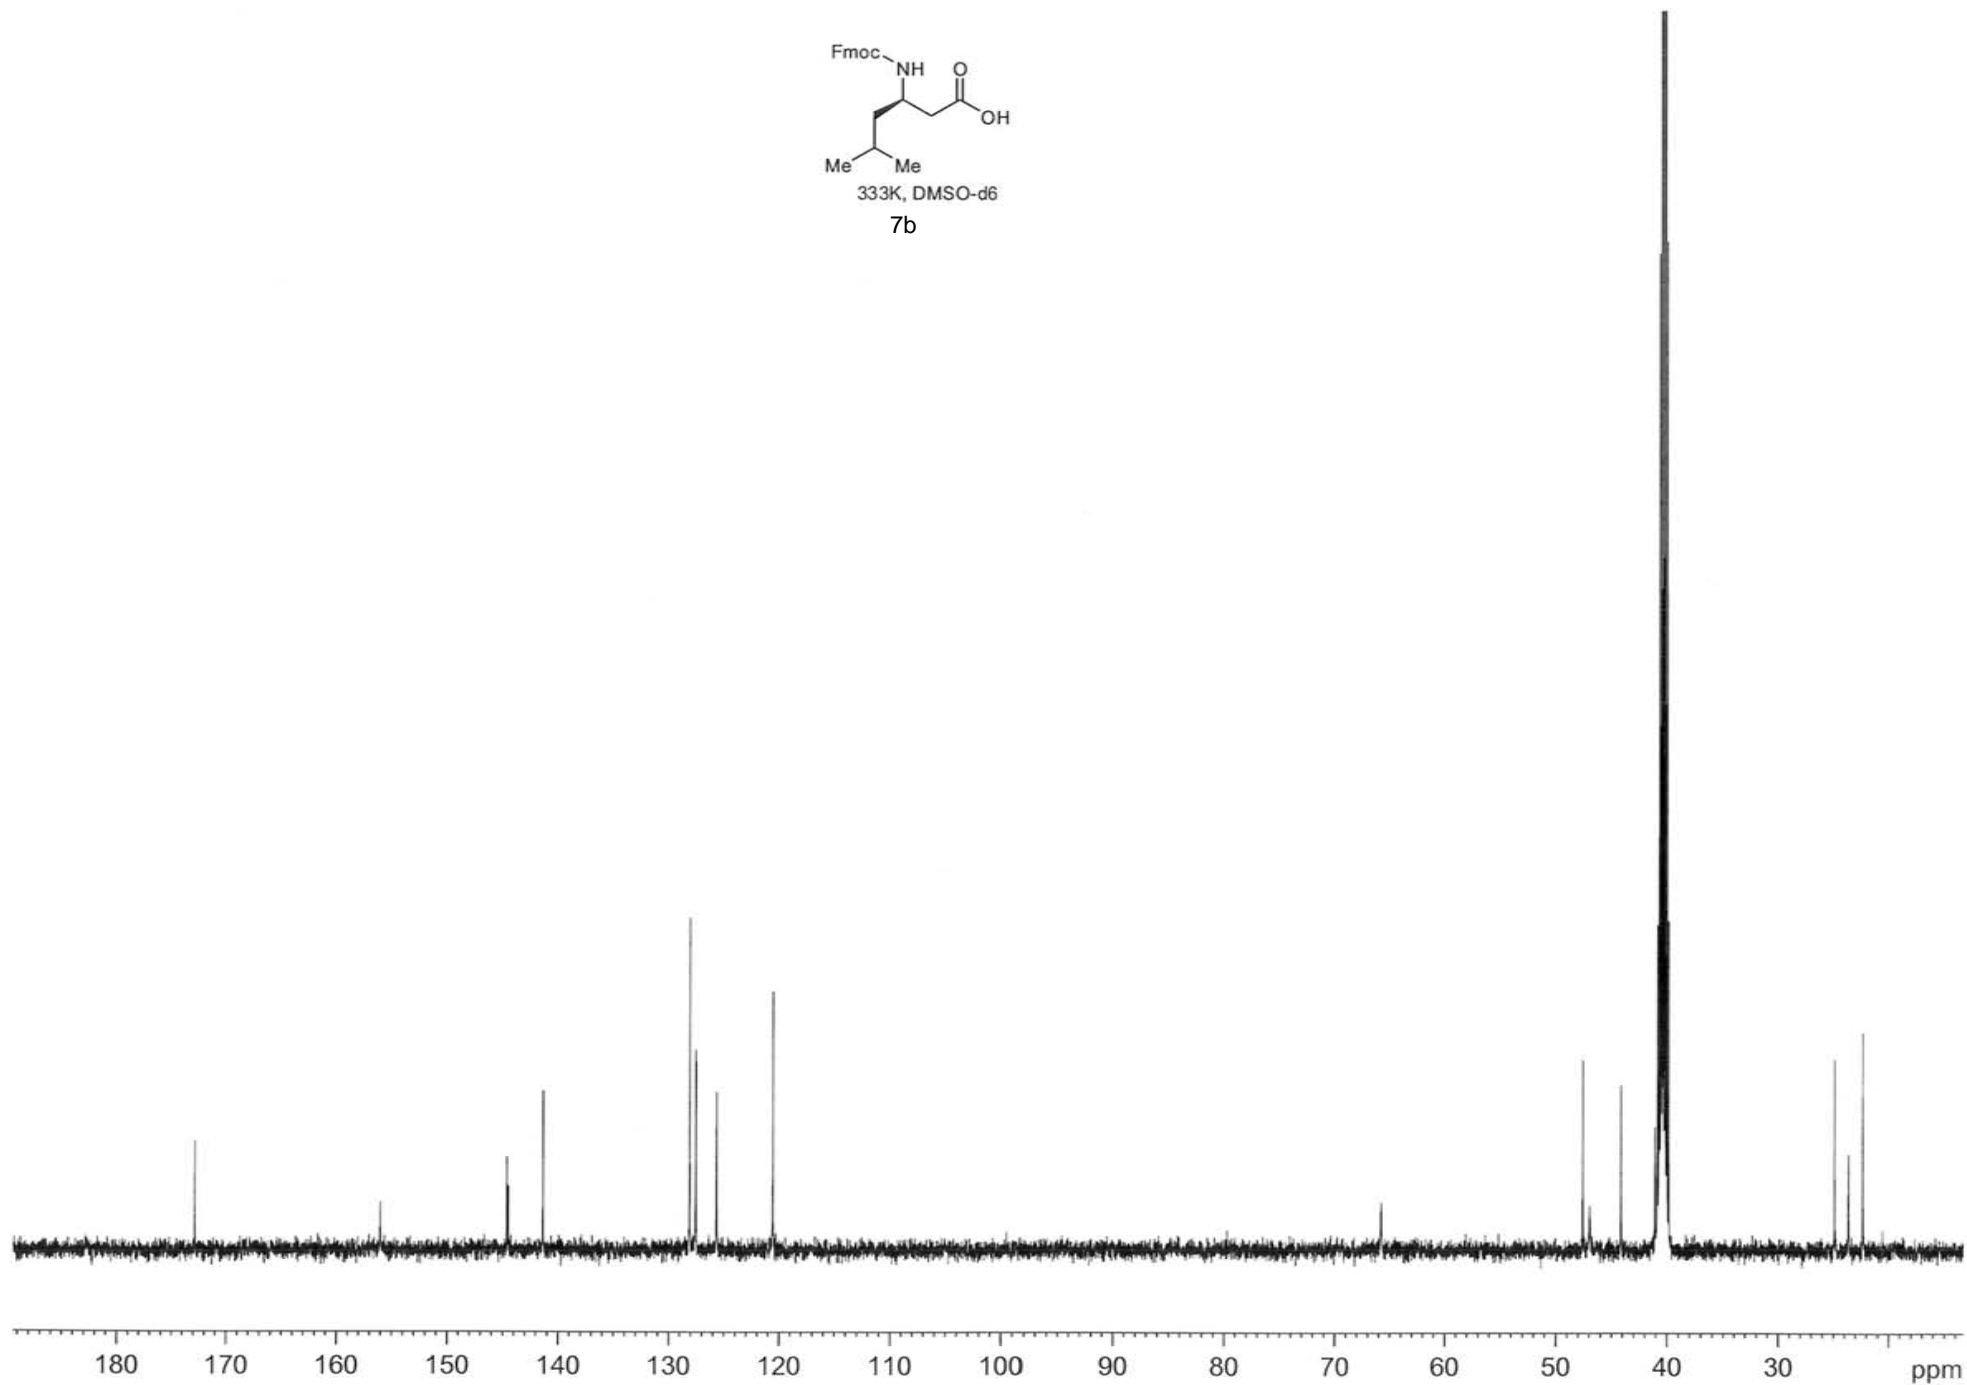

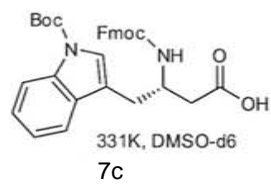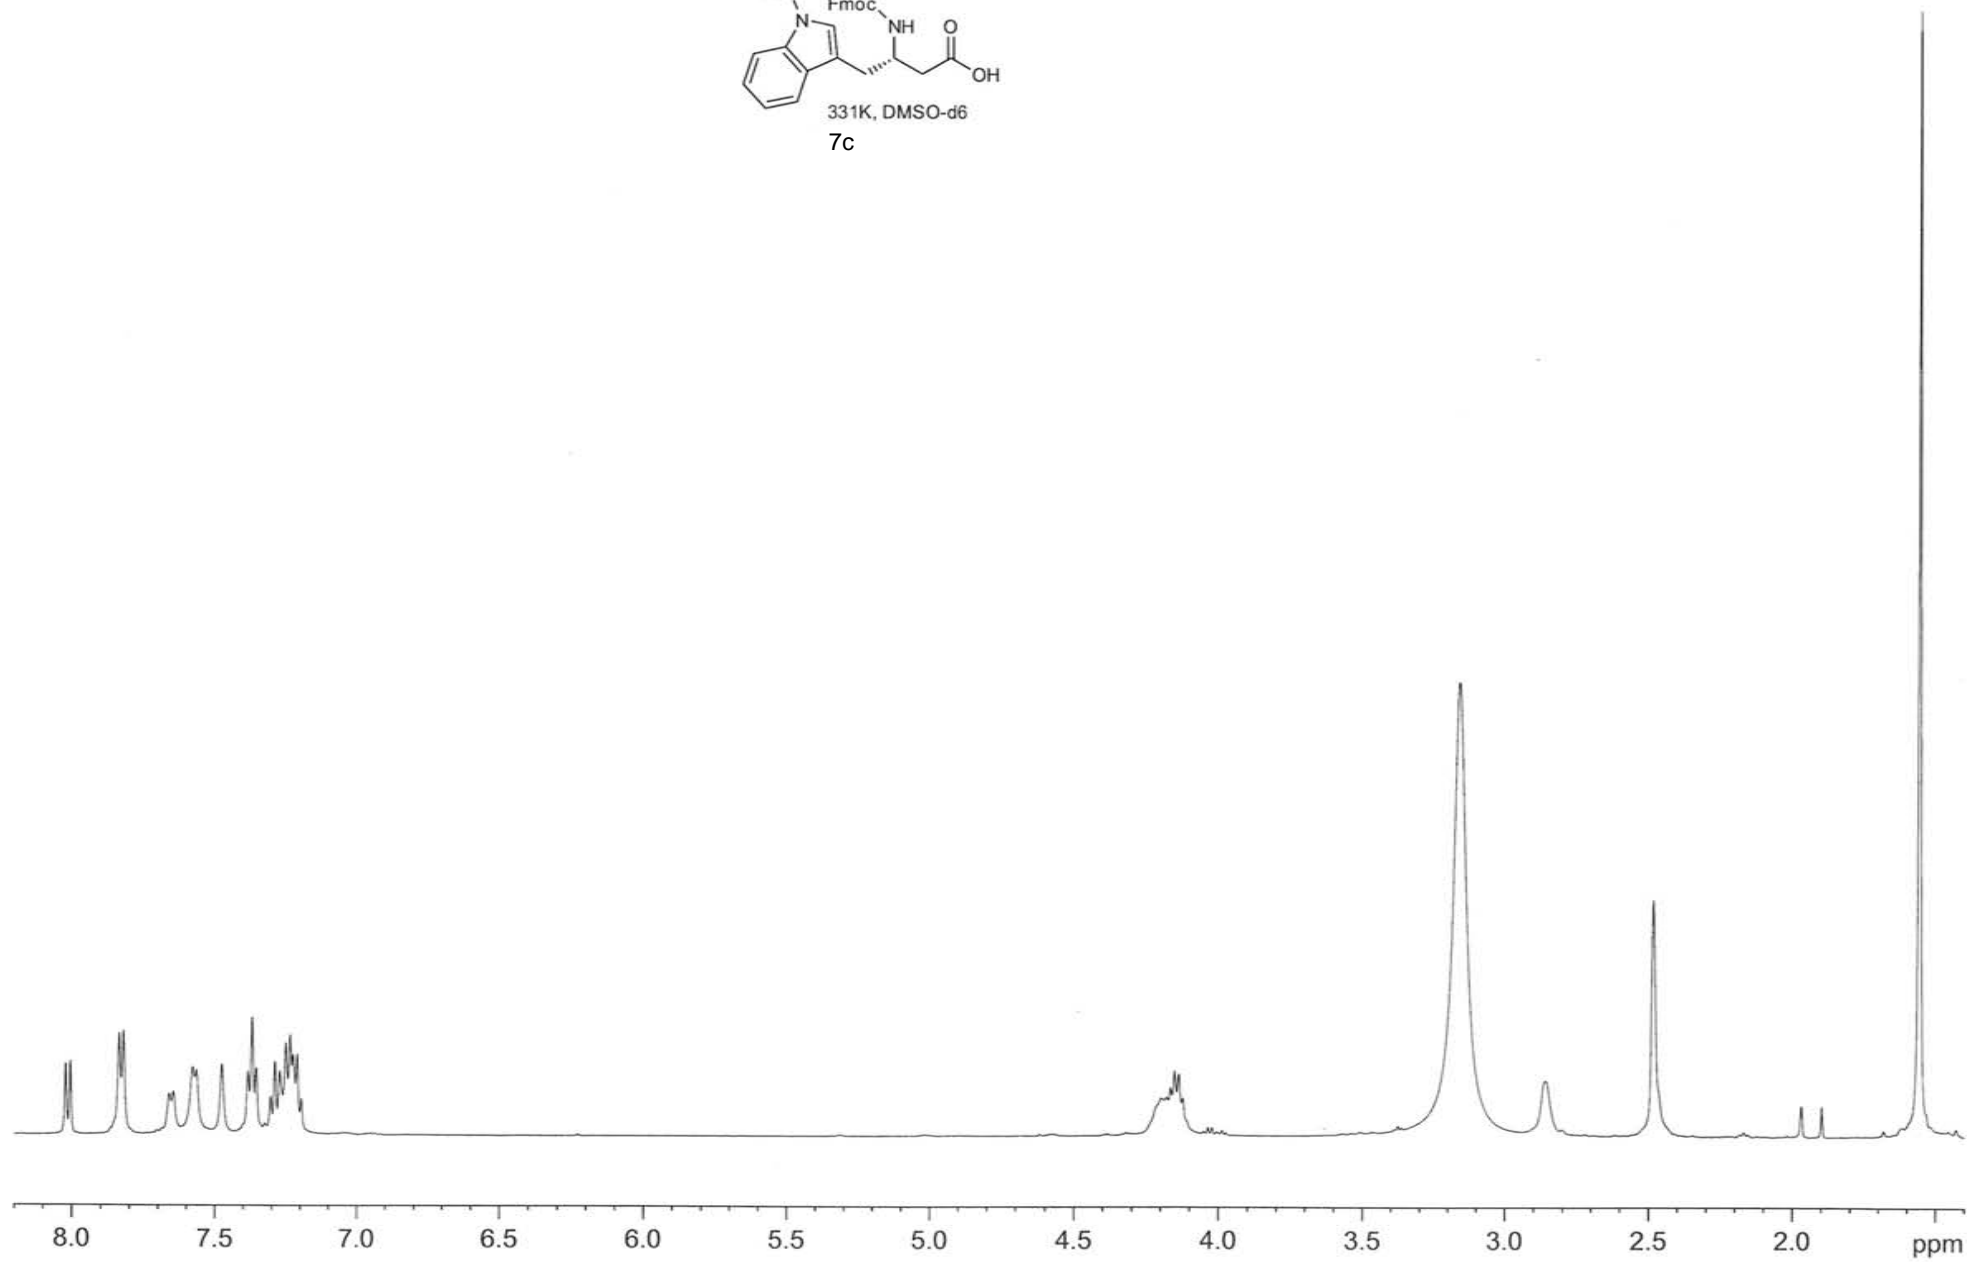

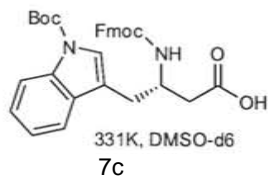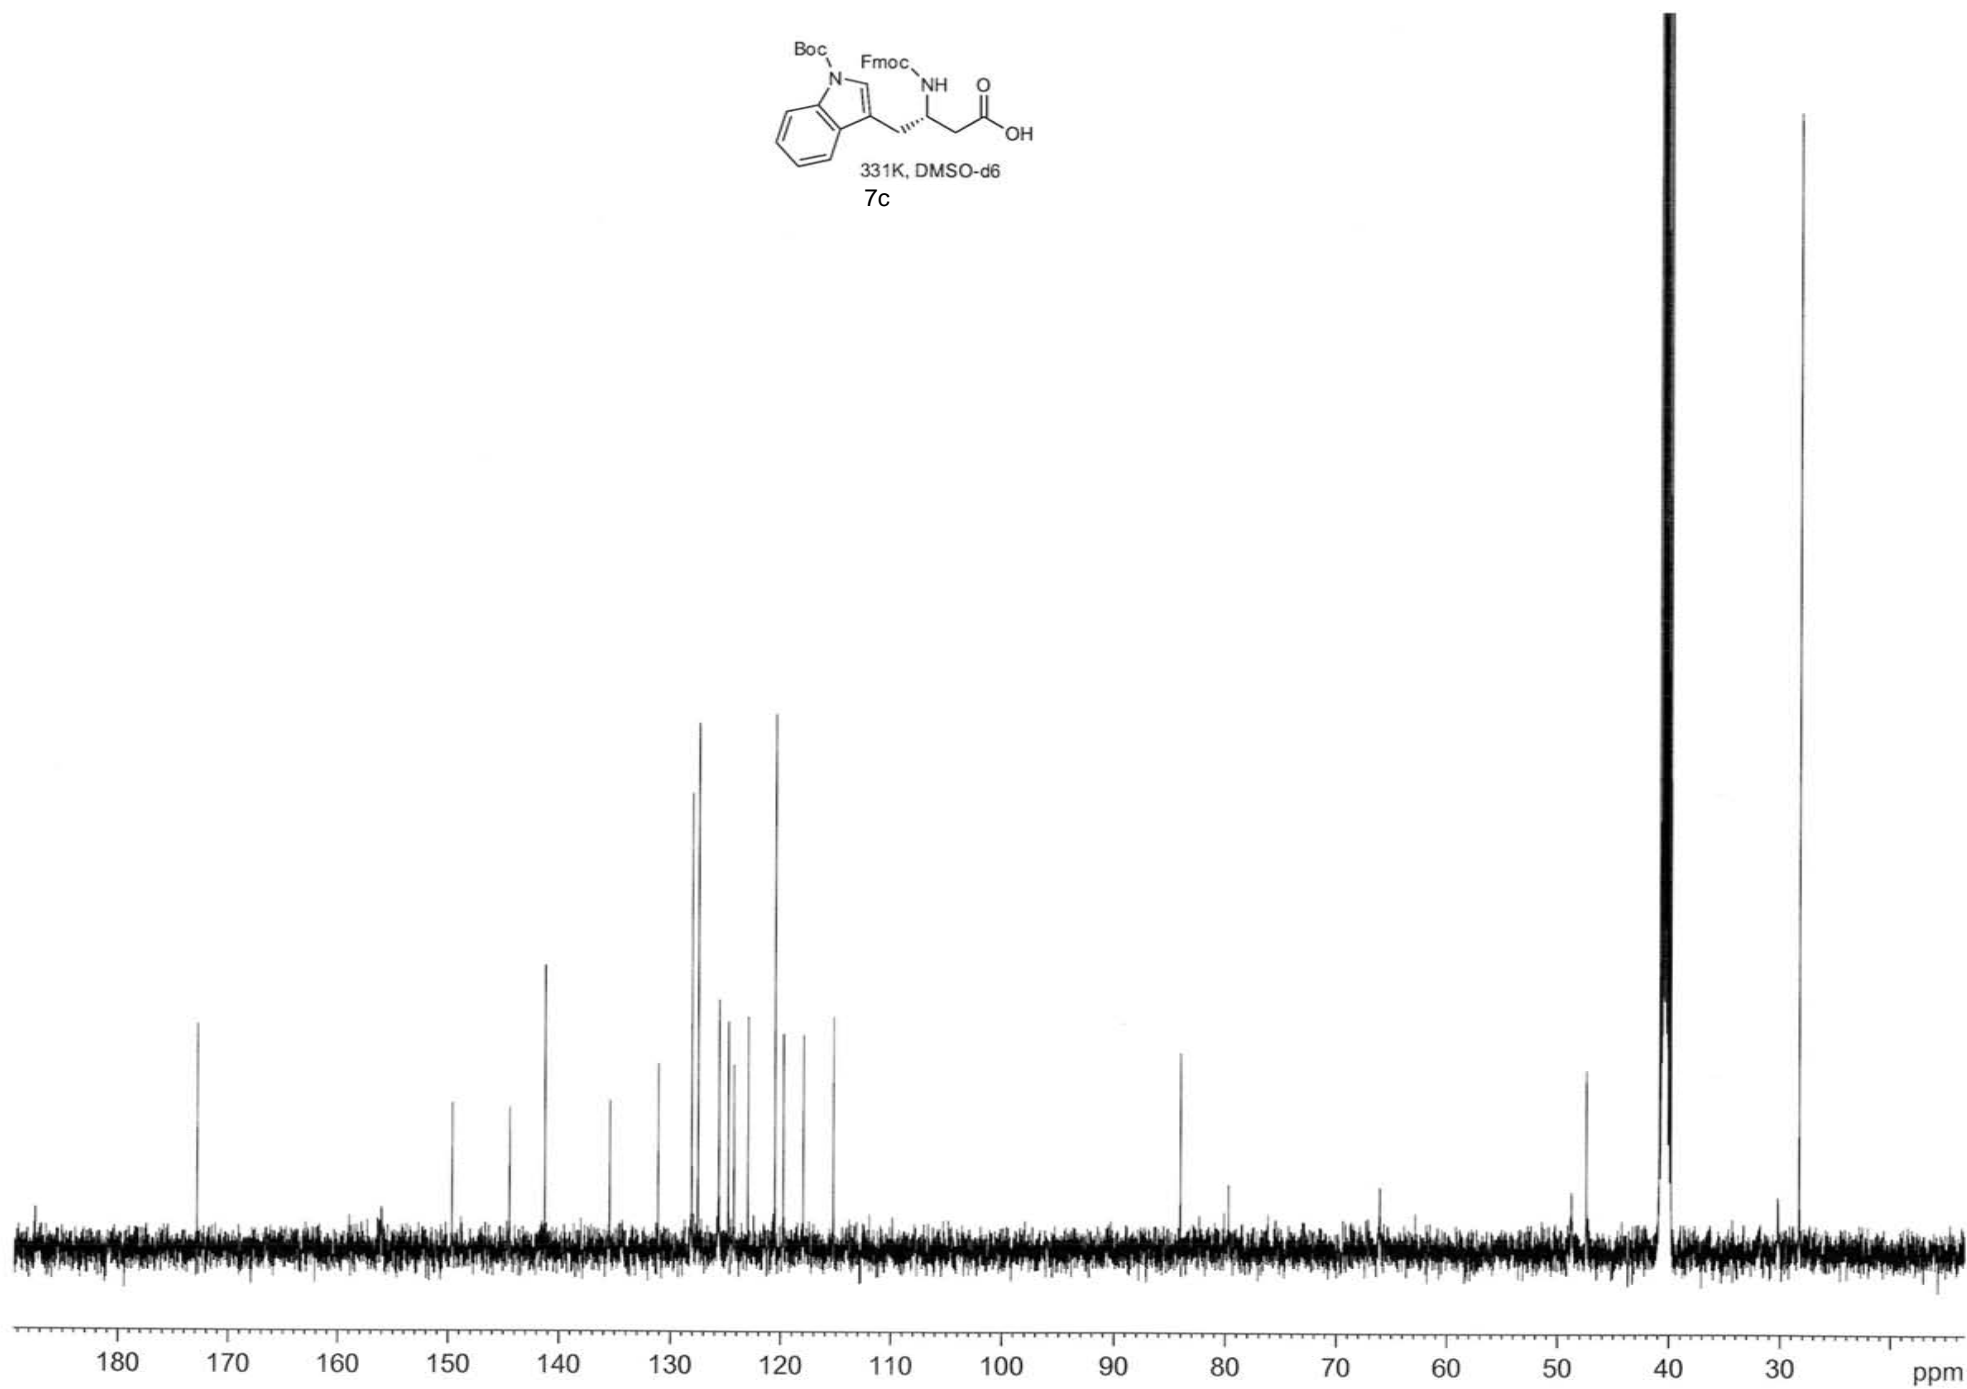

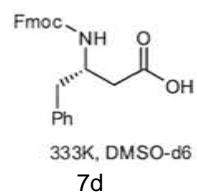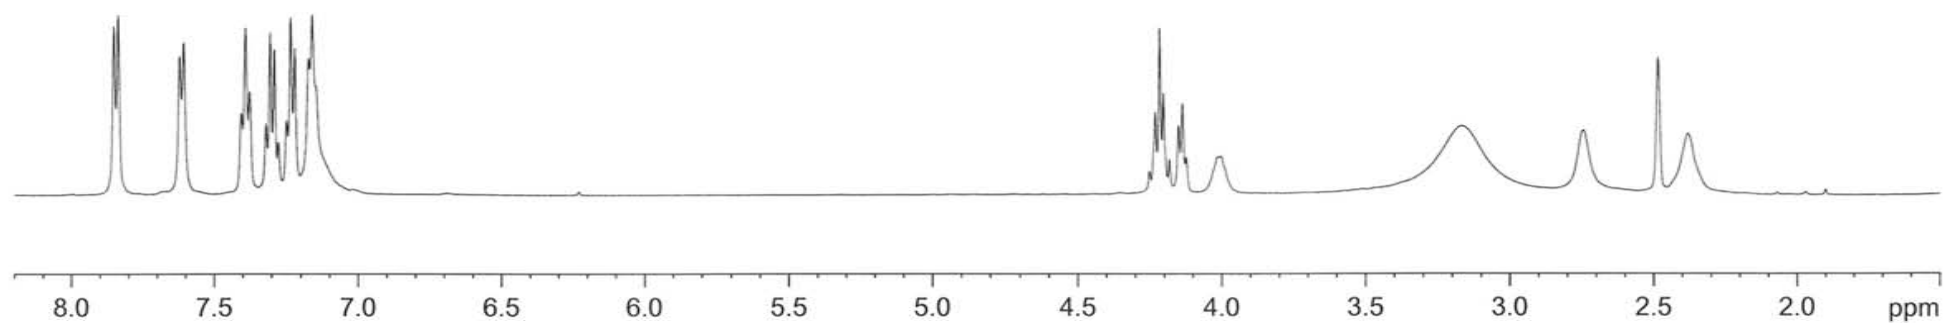

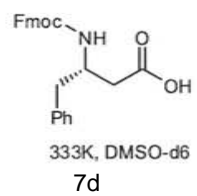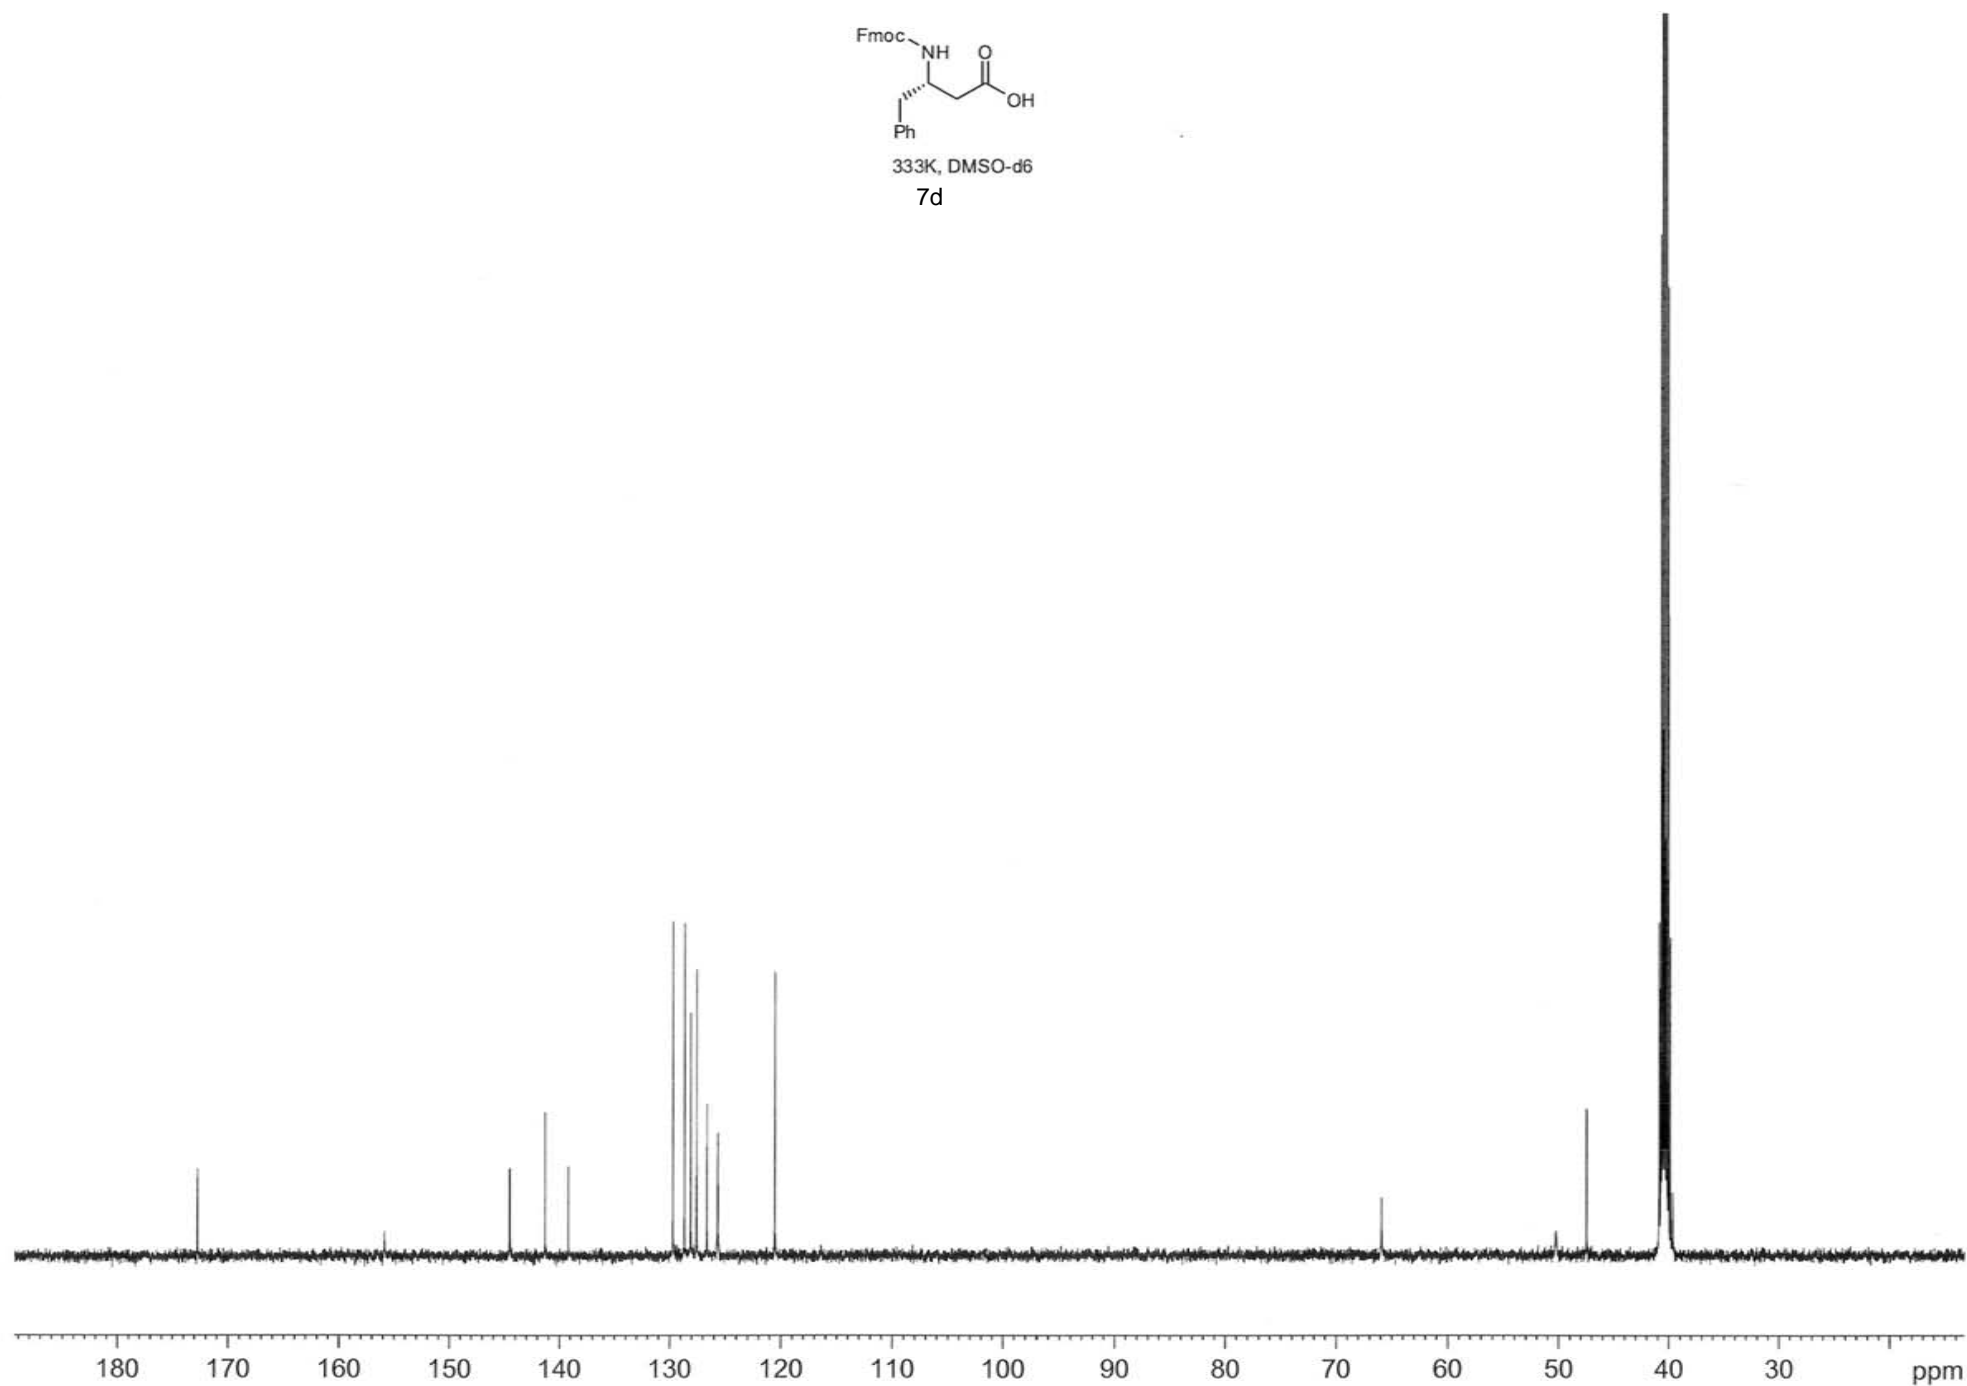

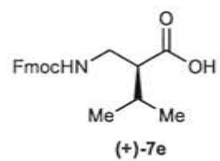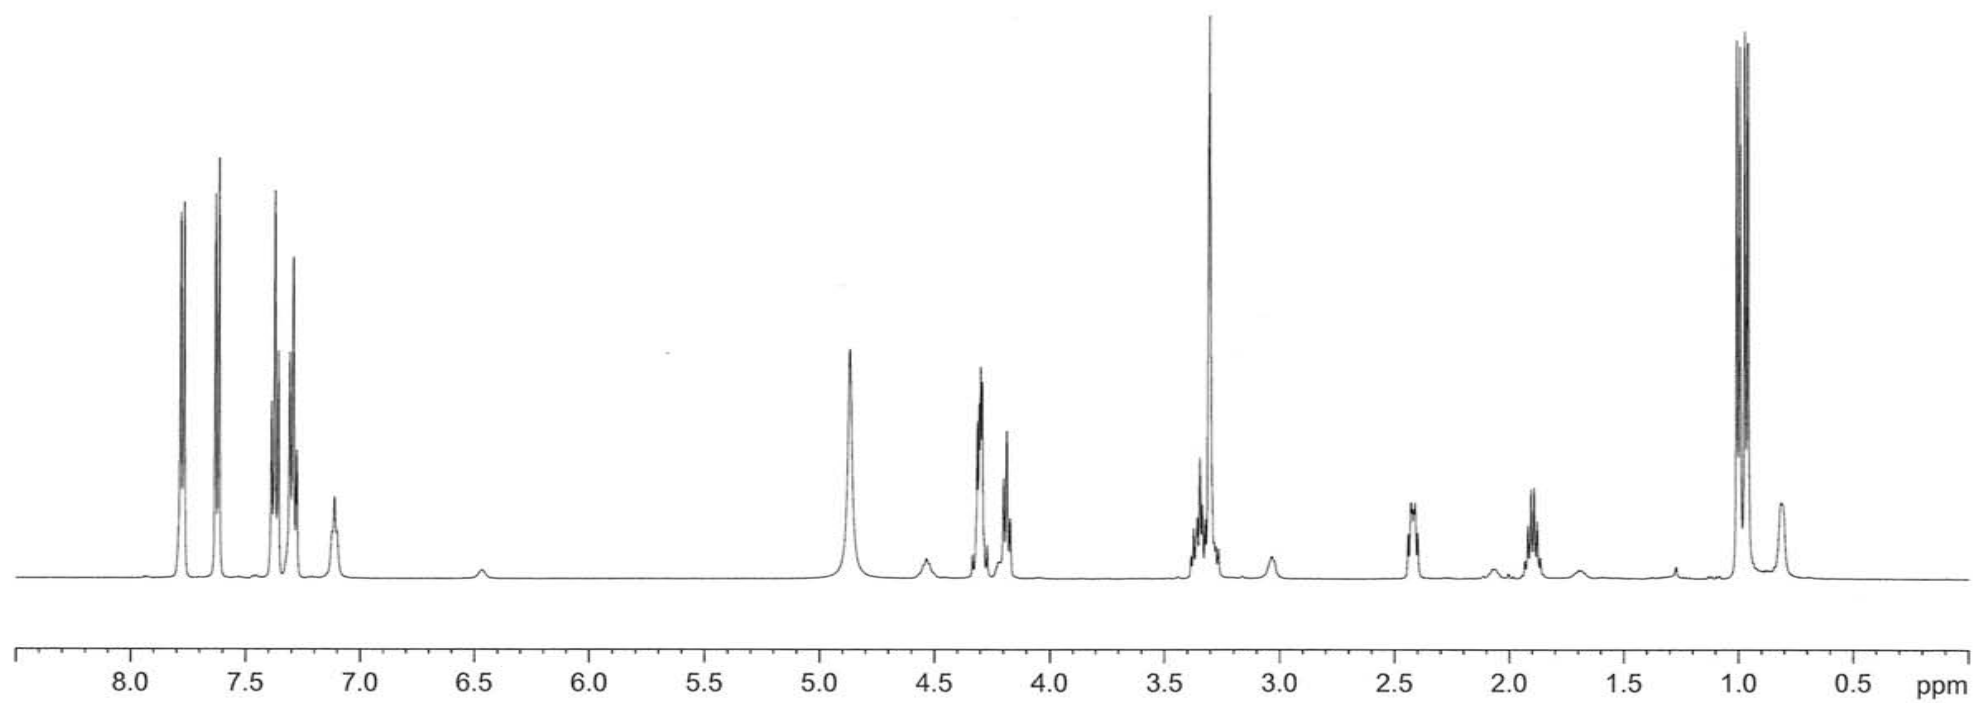



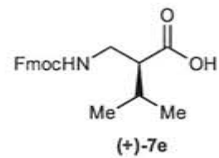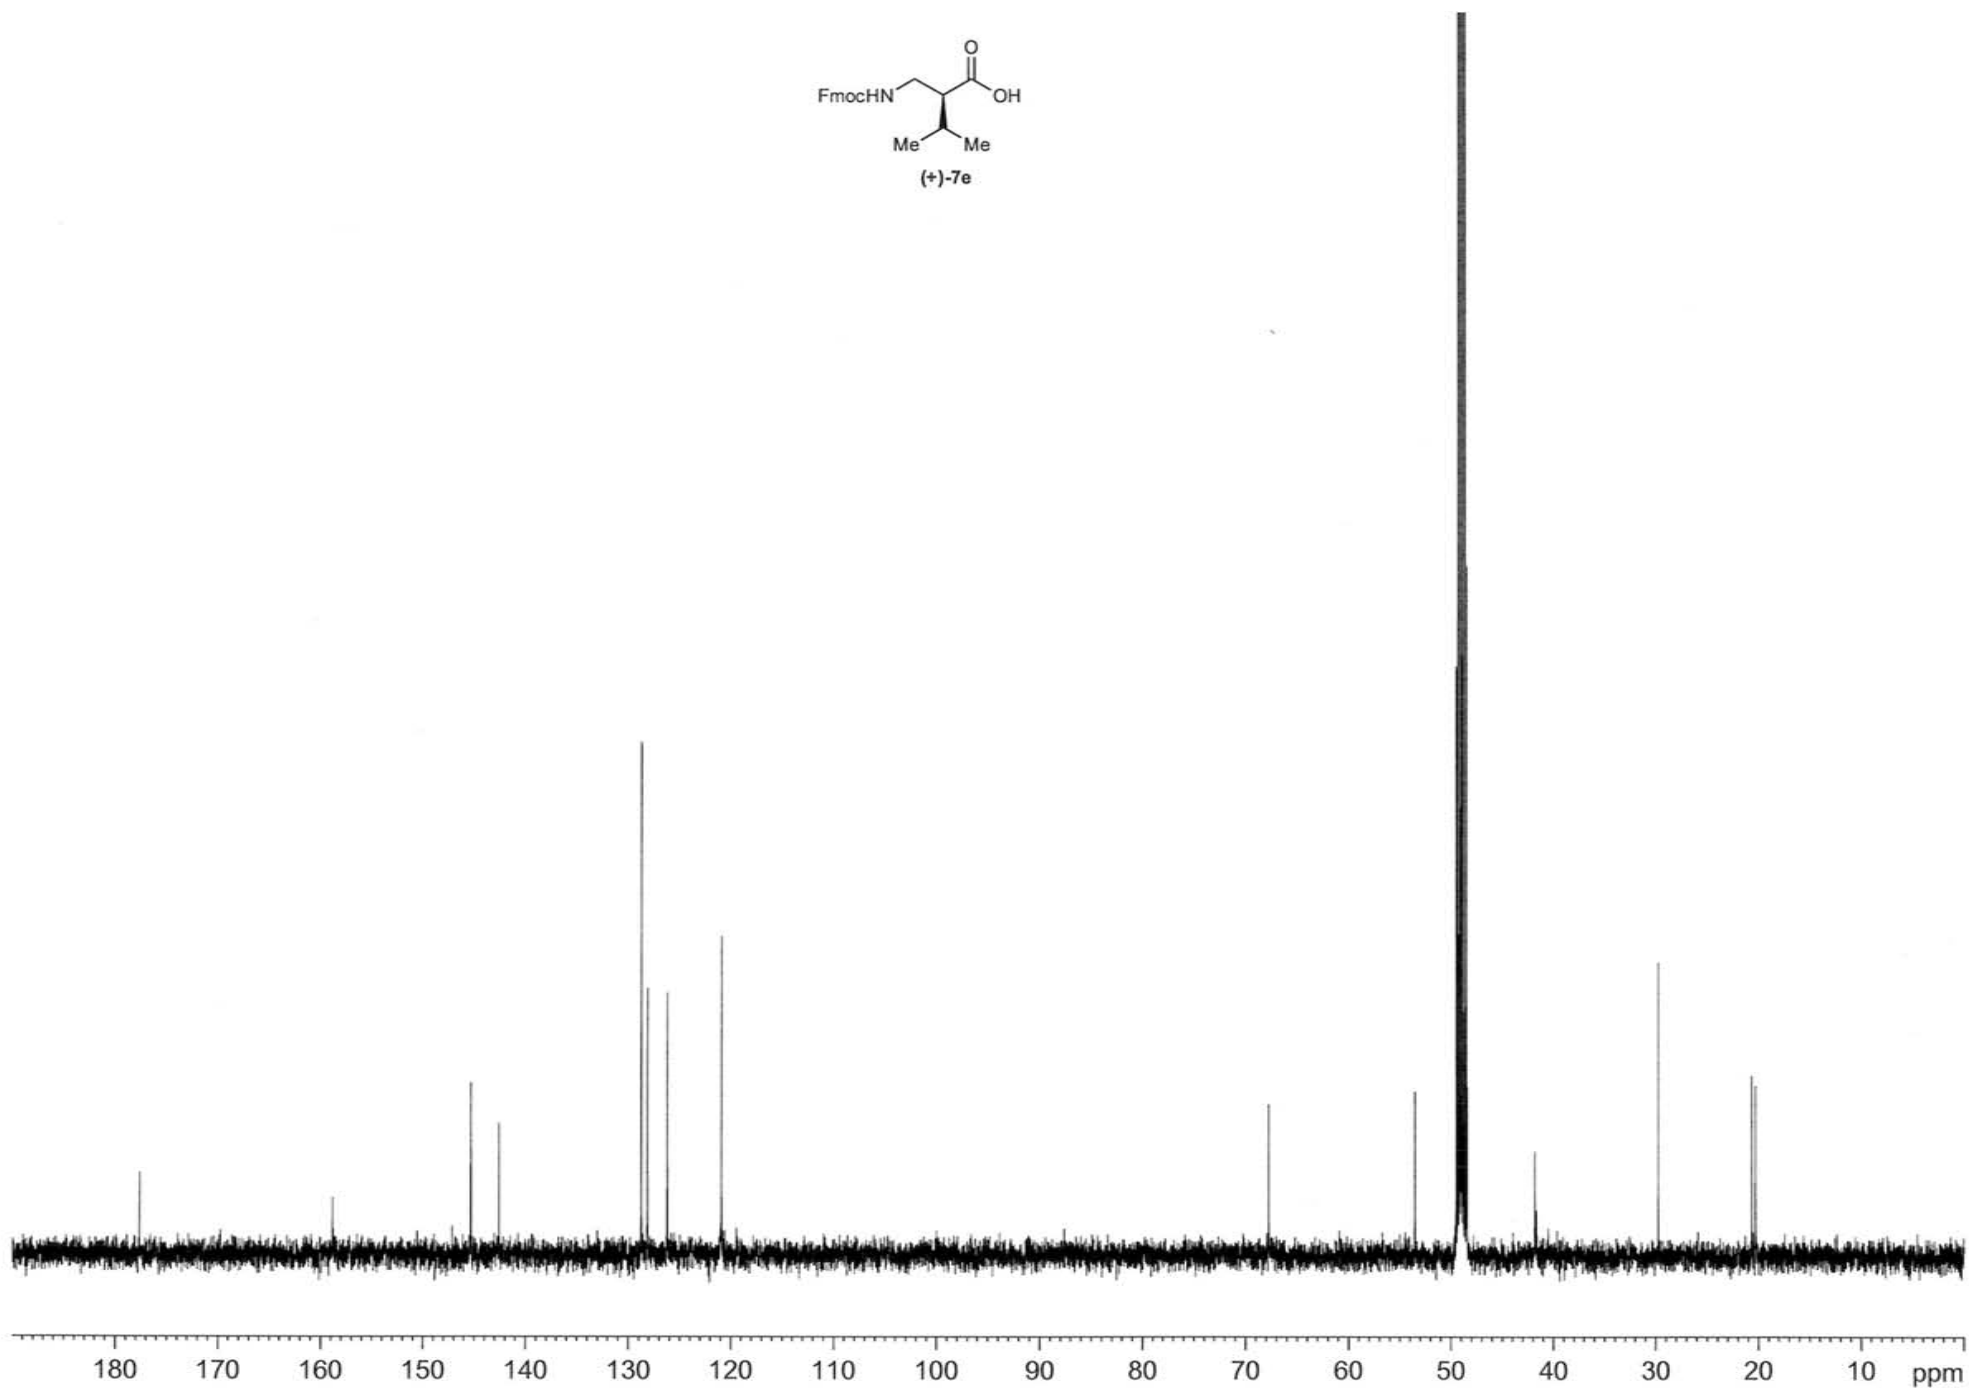

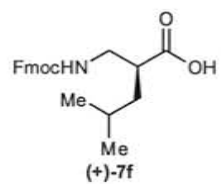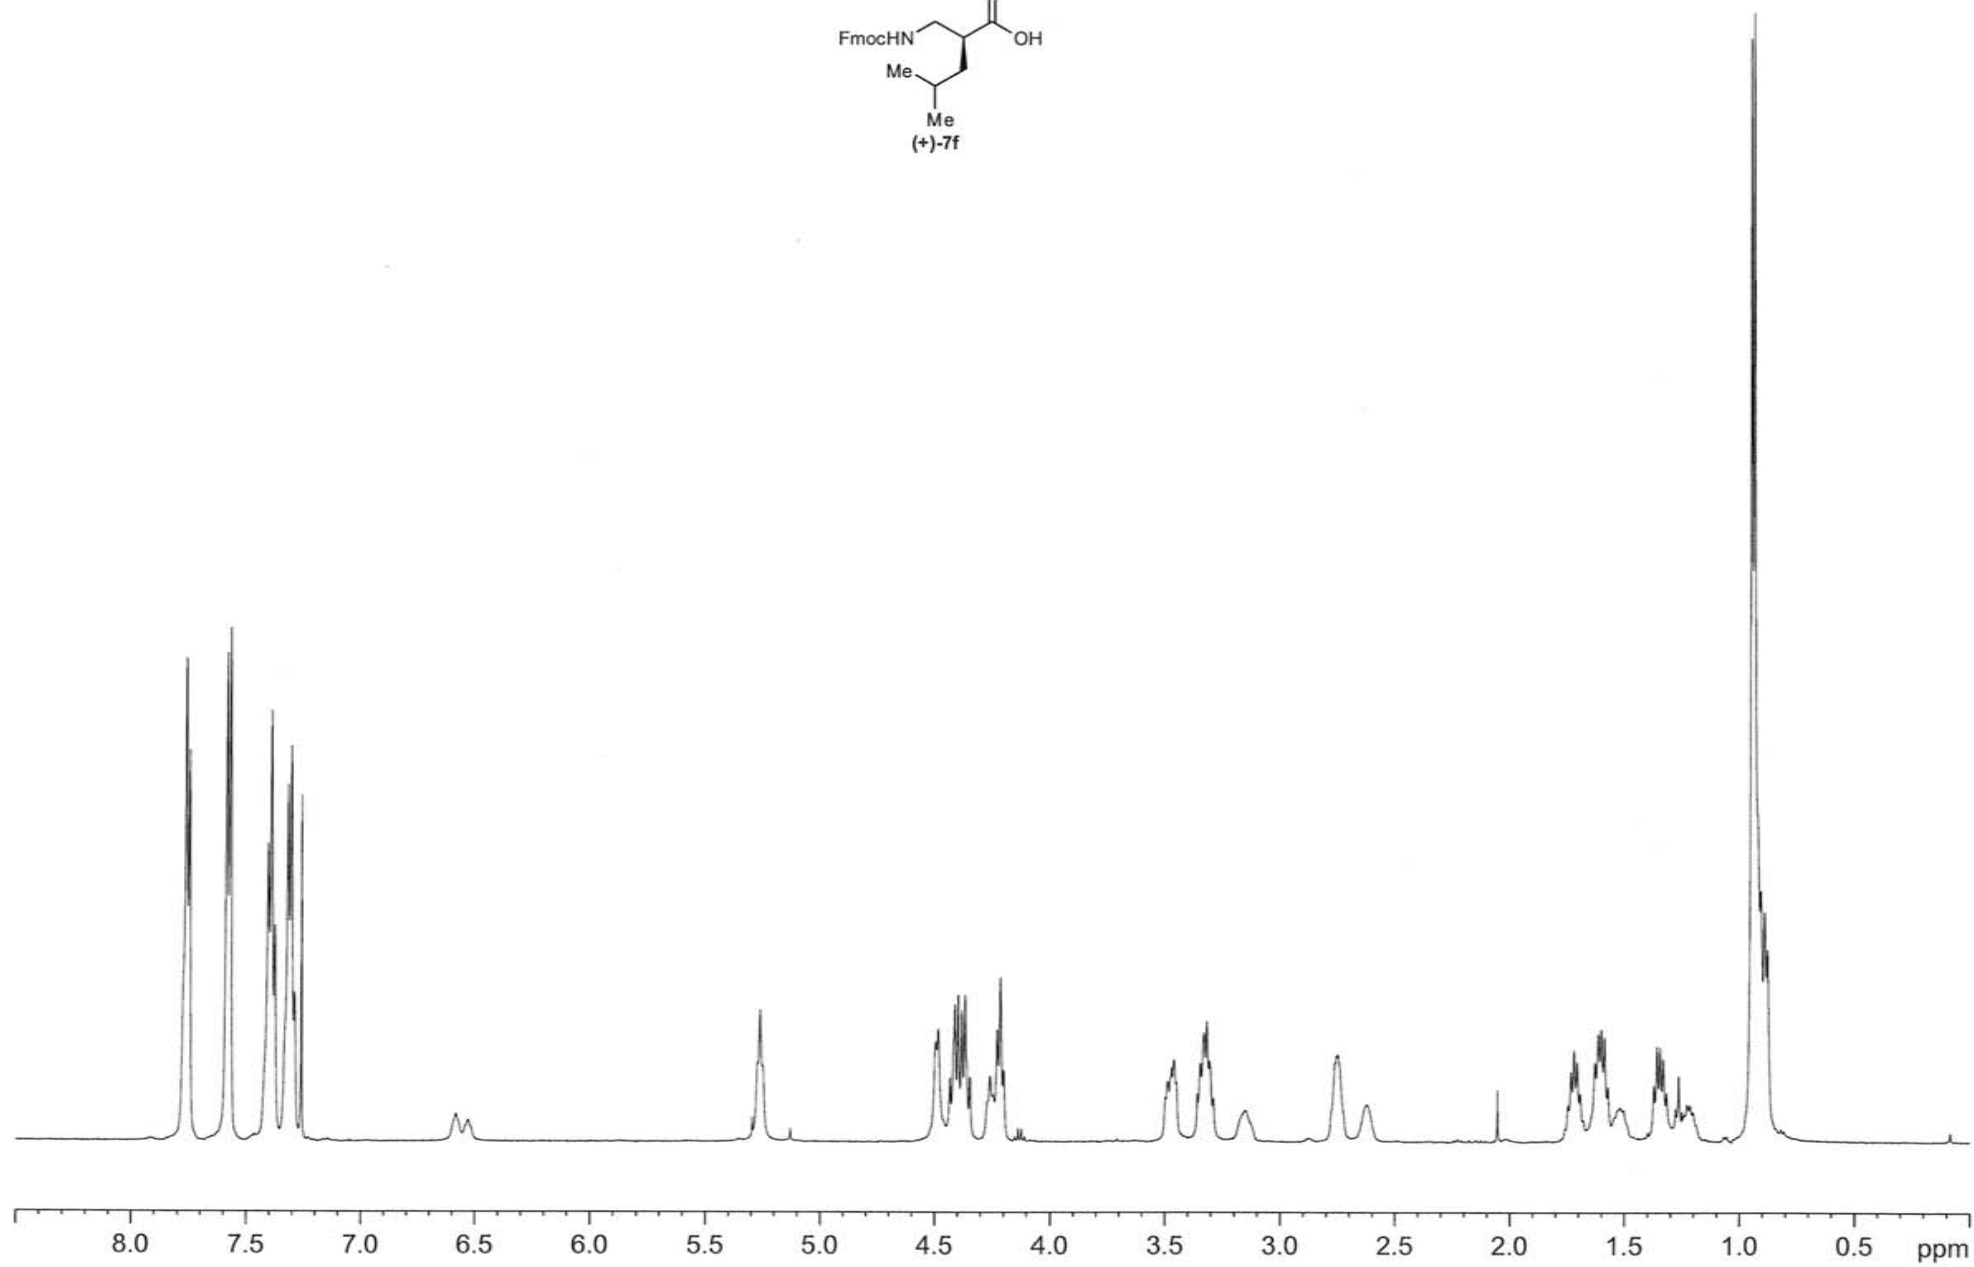

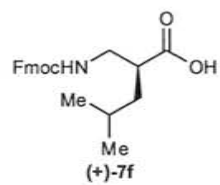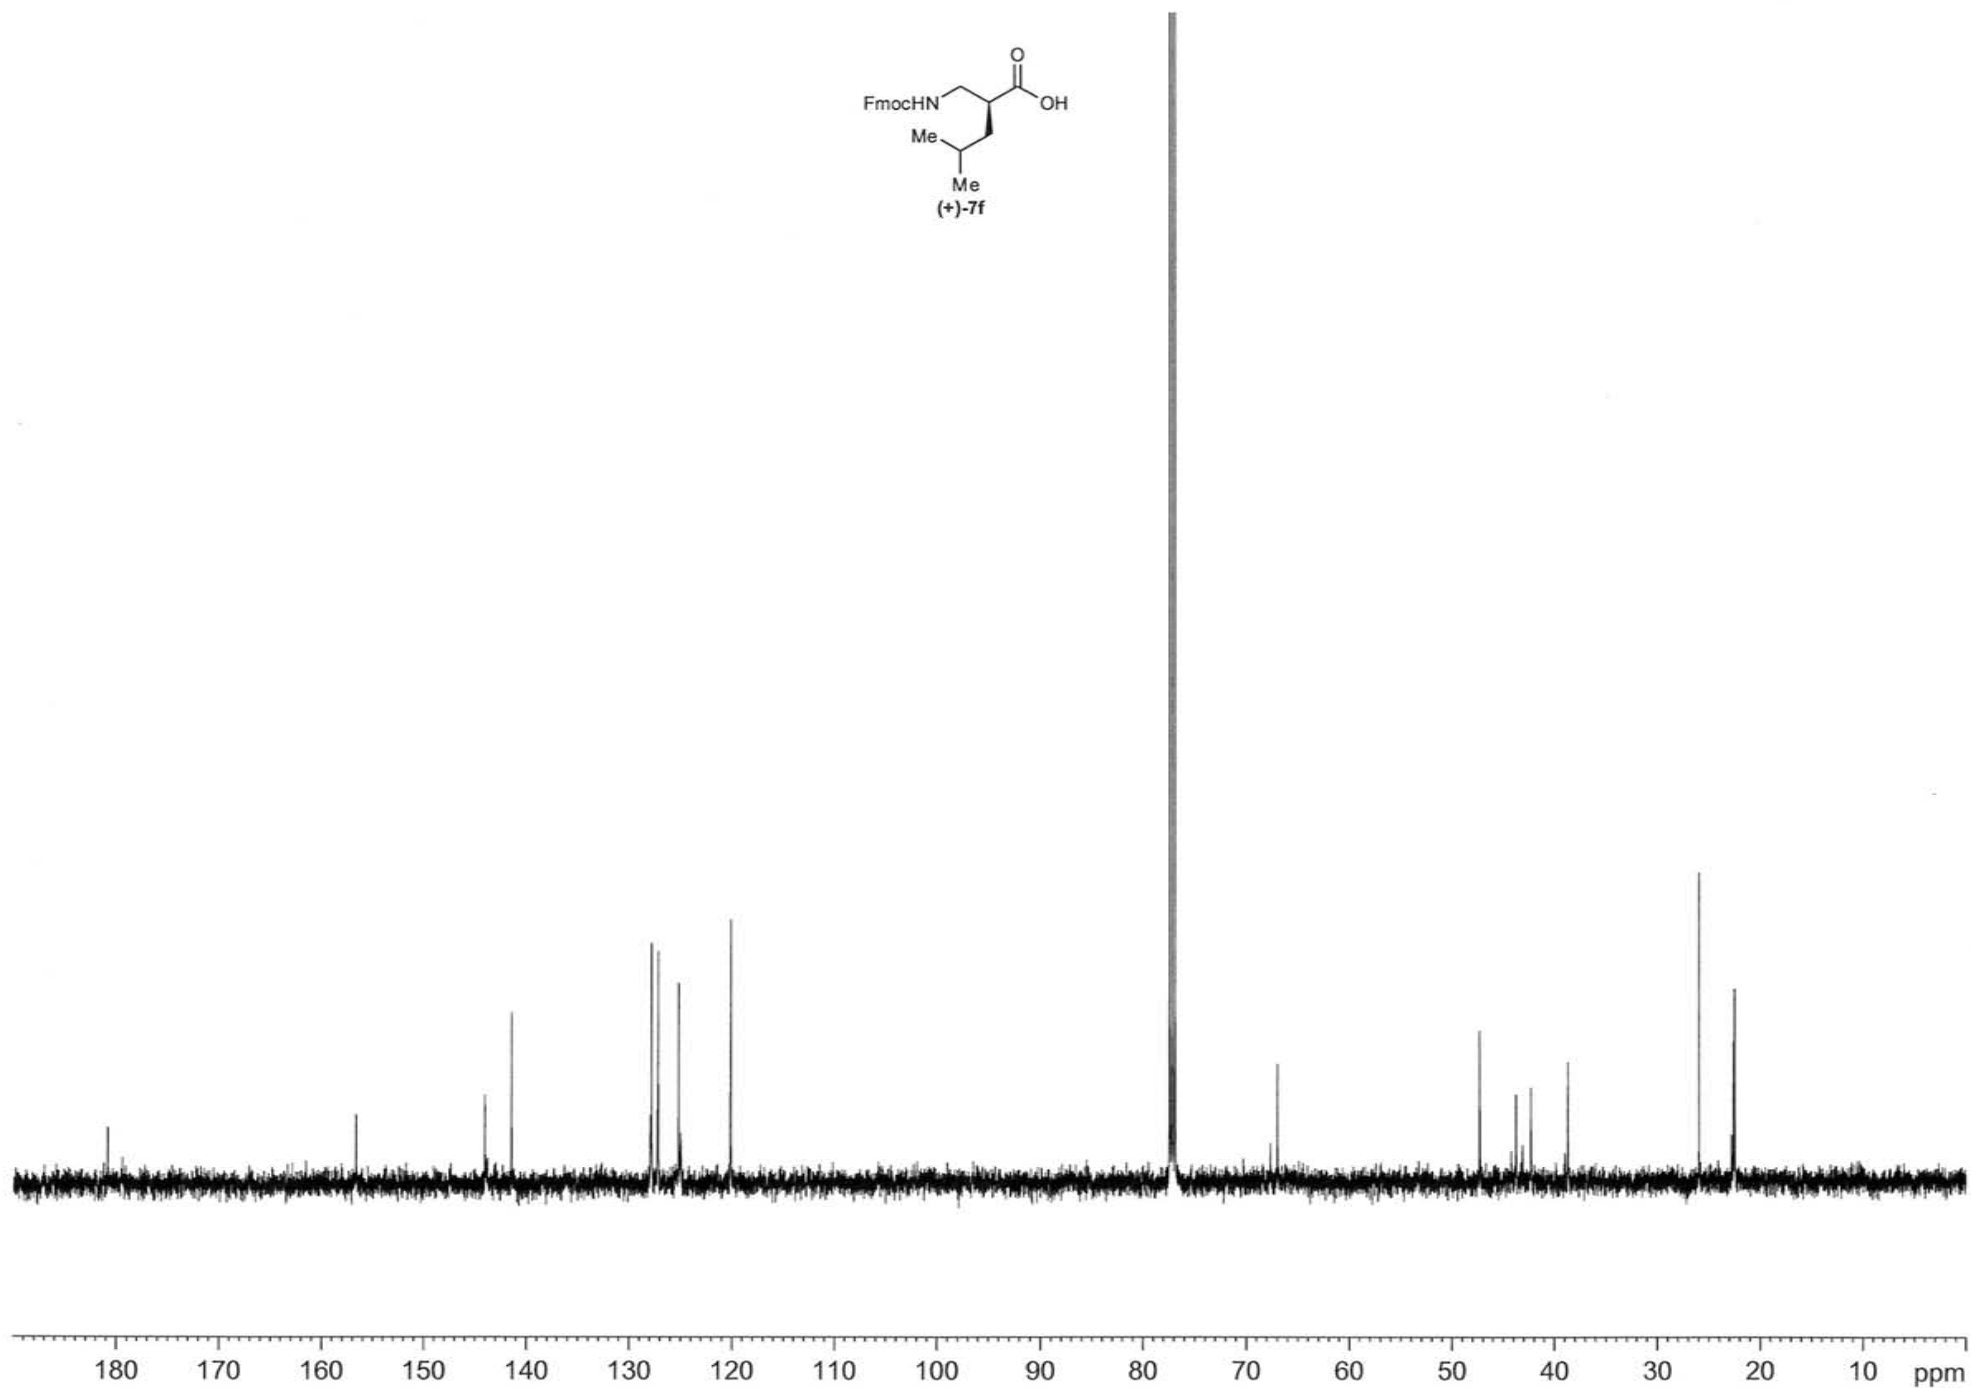

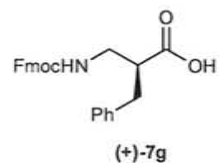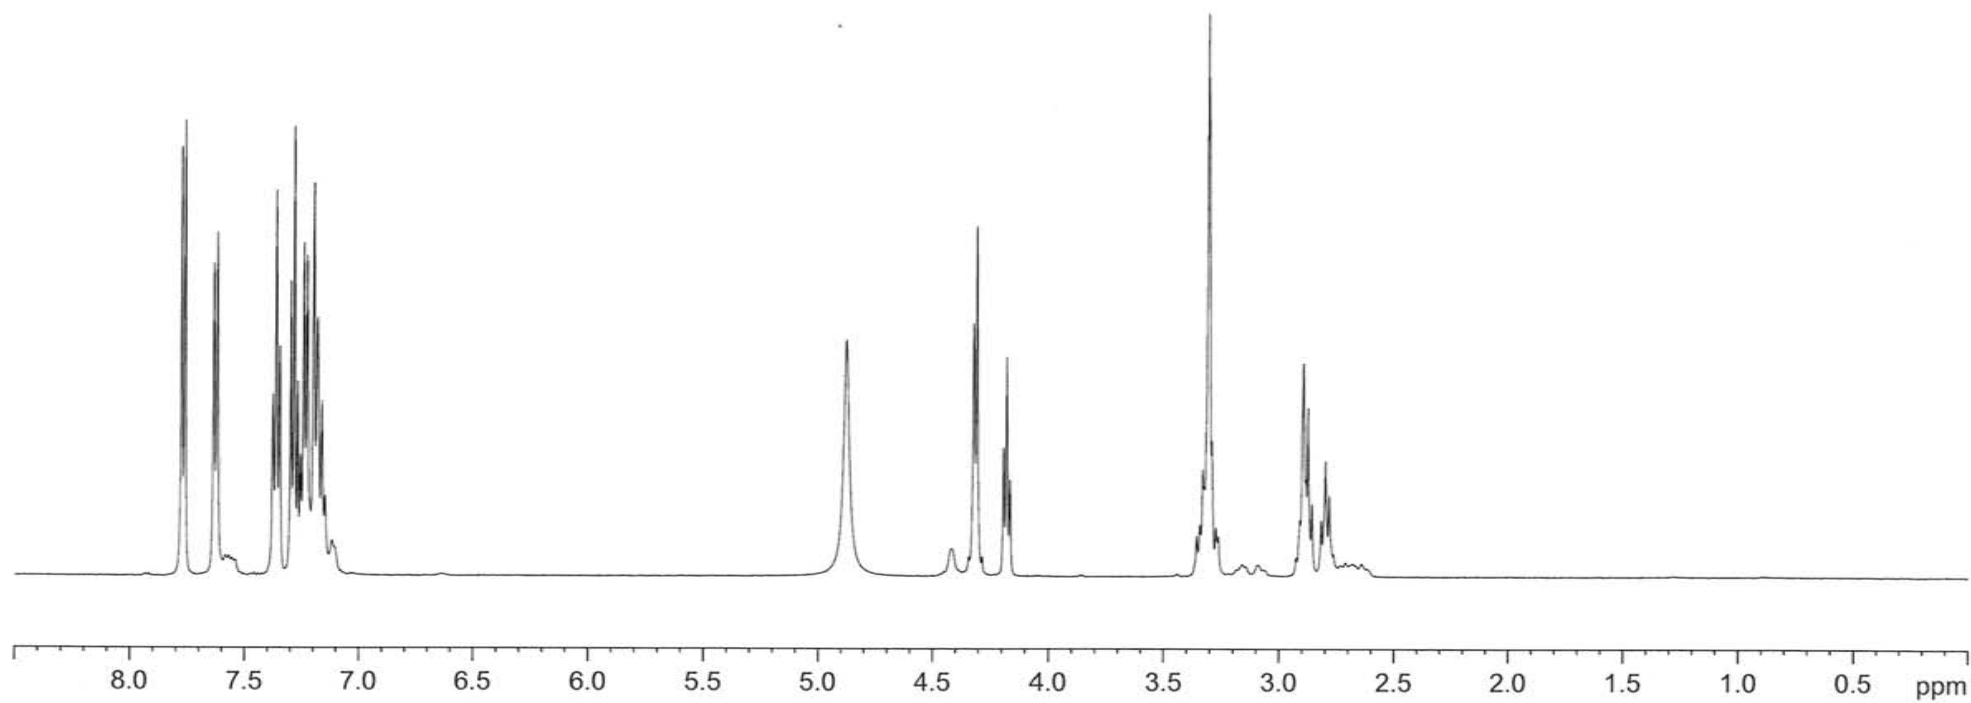

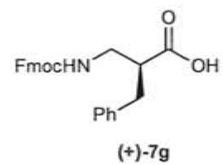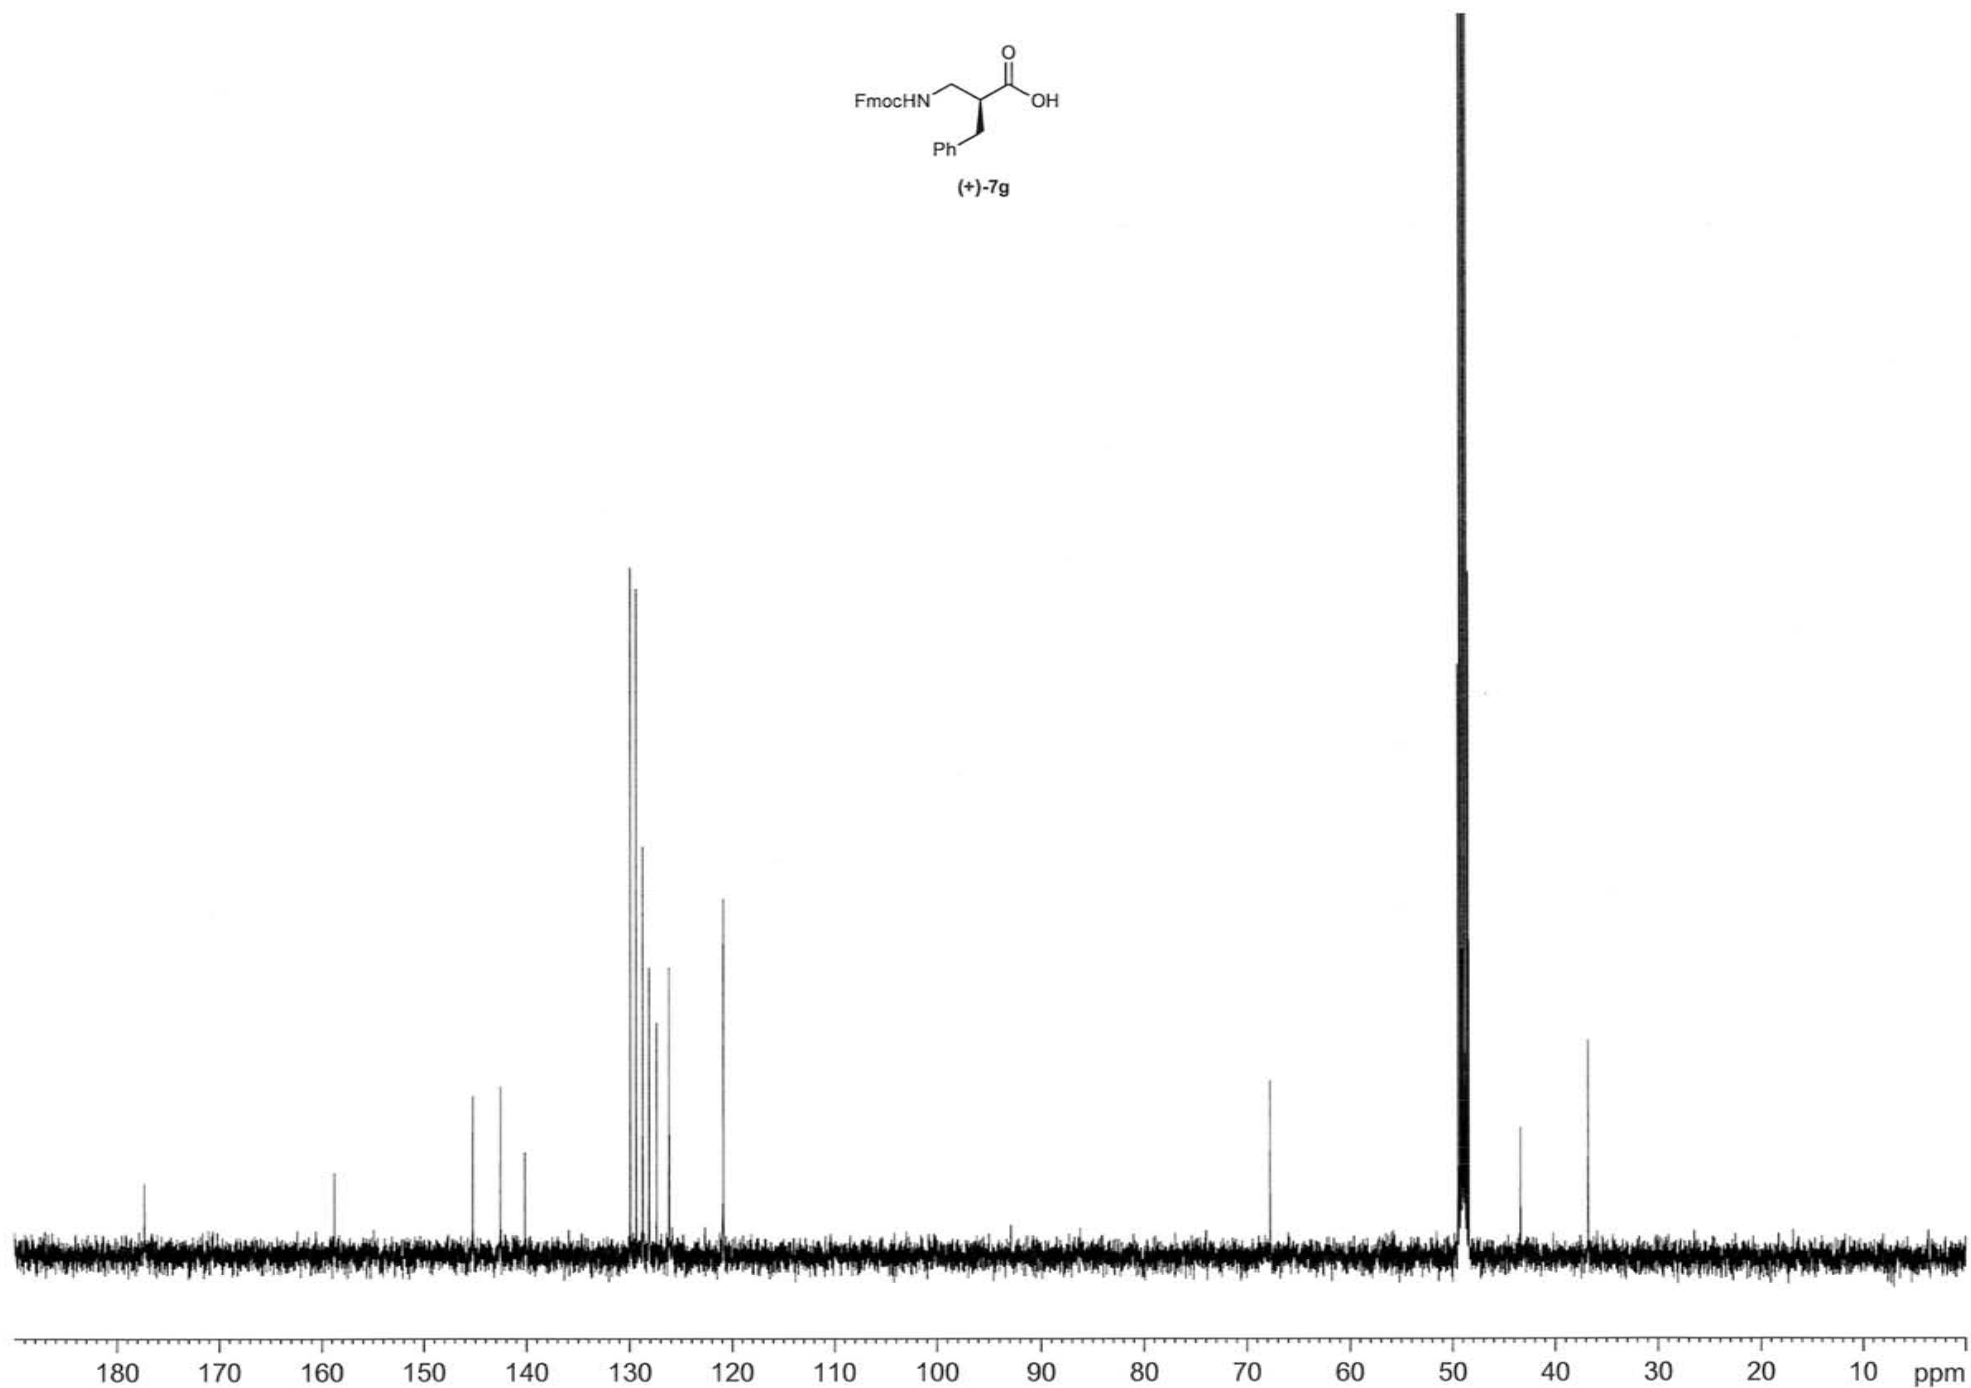

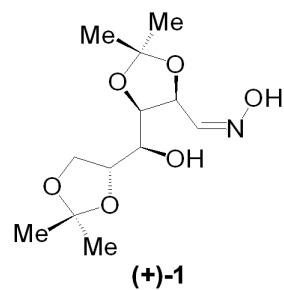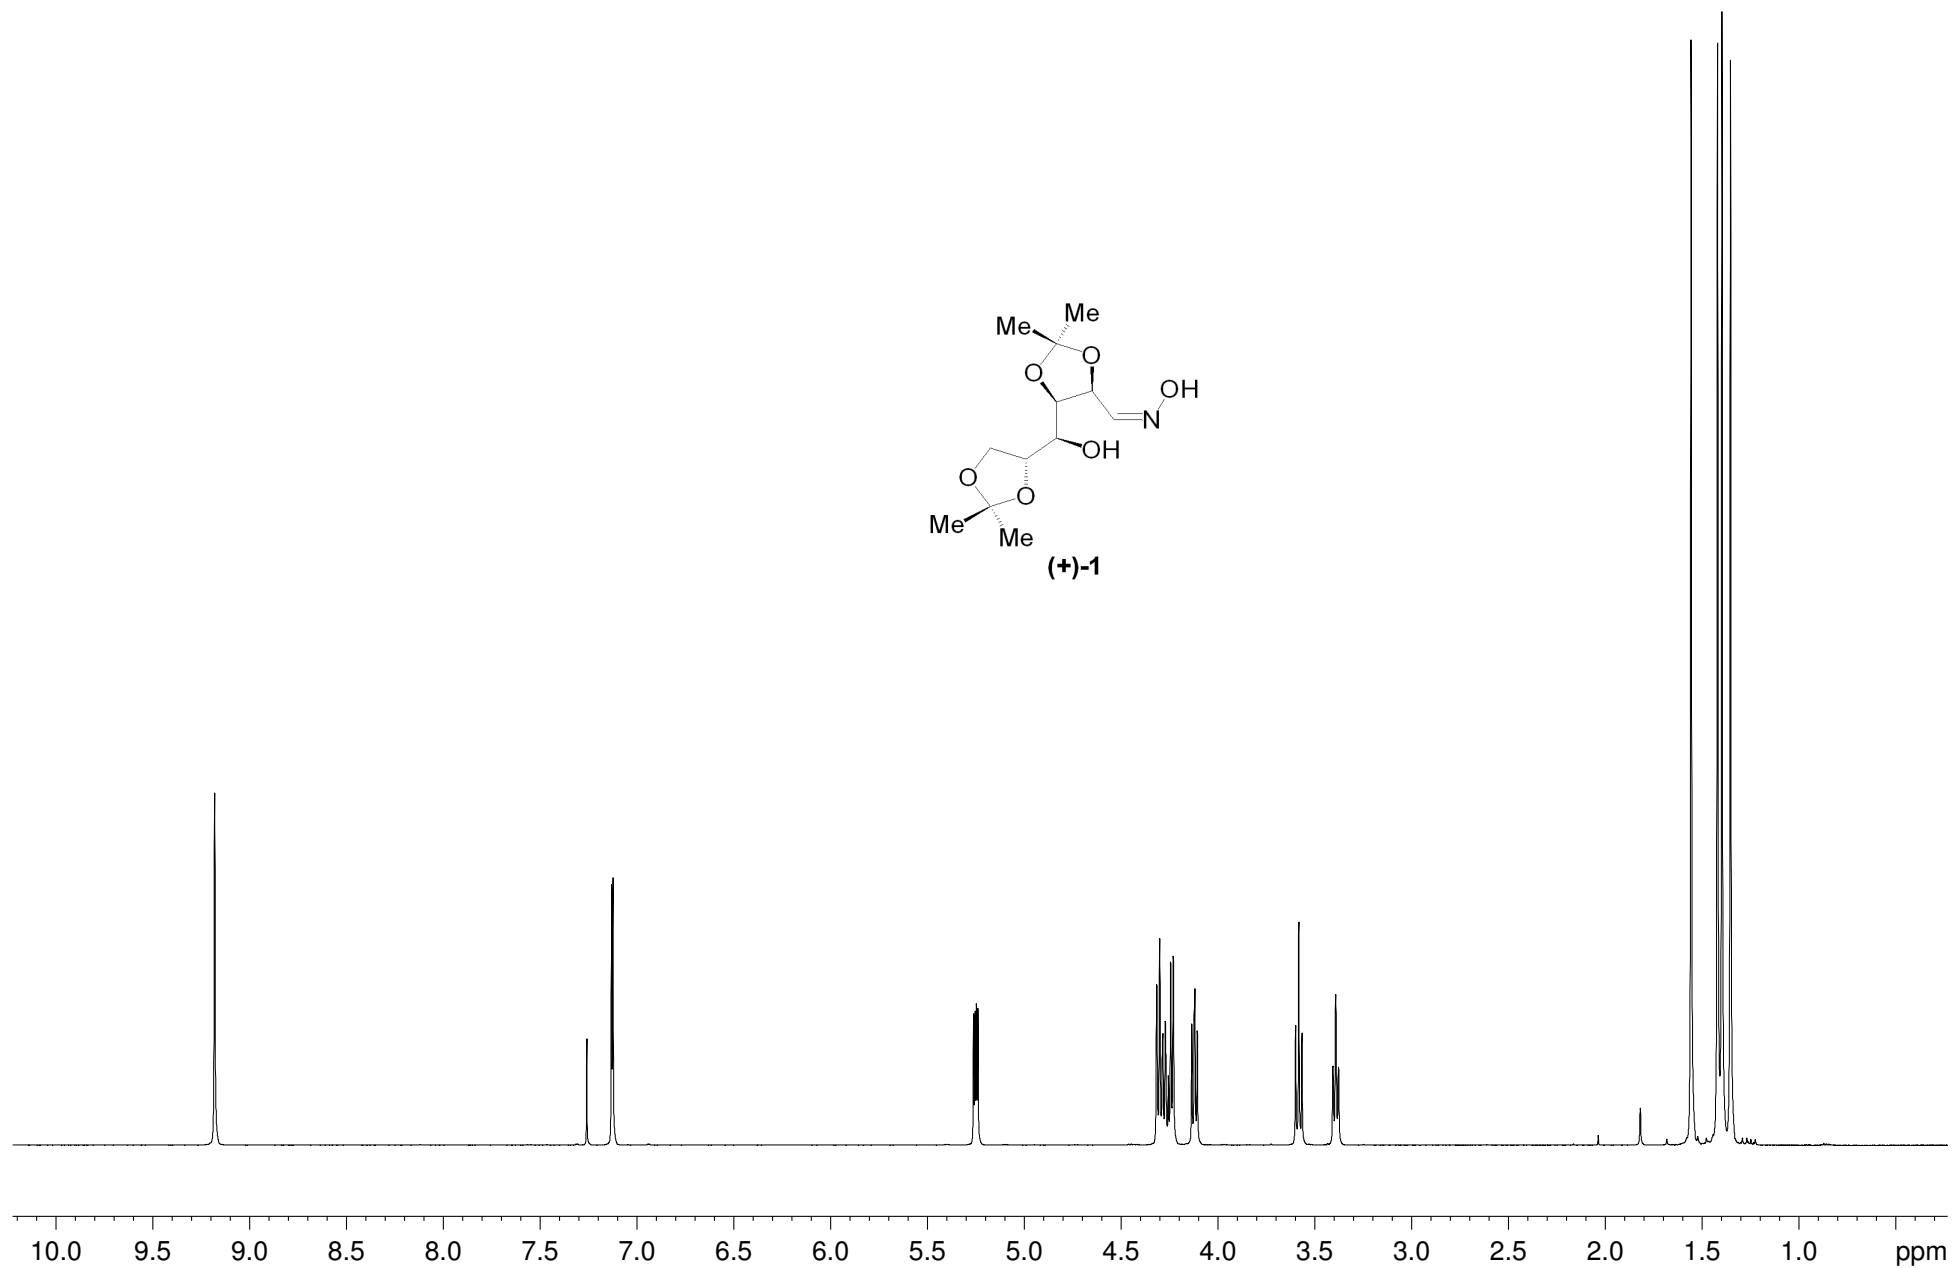

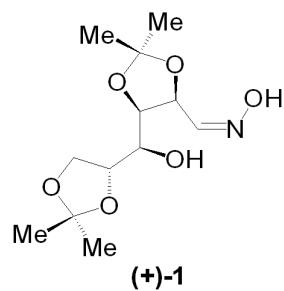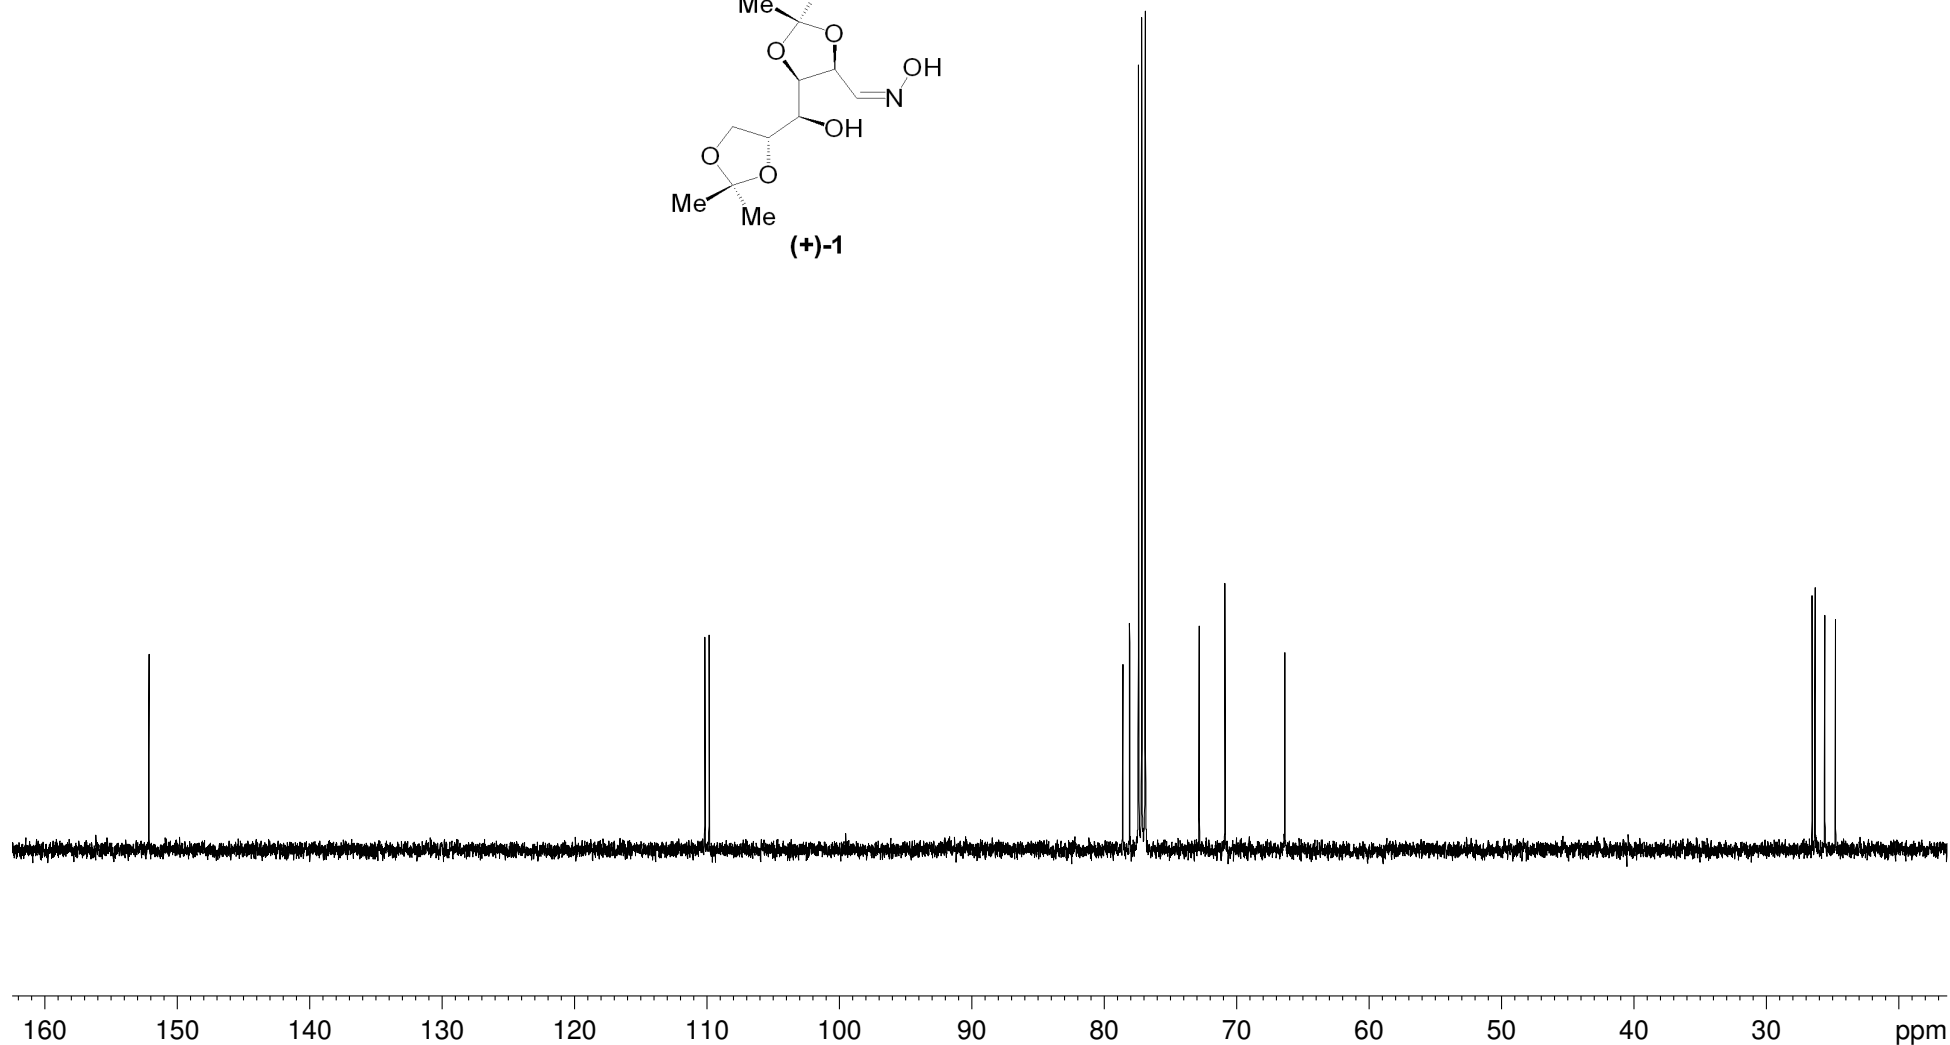

Supplement: c0sc00317d.pdf [file c0sc00317d.pdf]
